# Supplementary material for: A genome wide CRISPR/Cas9 screen identifies calreticulin as a selective repressor of ATF6α
Source: bioRxiv preprint, doi:10.1101/2024.02.10.579381, version 2 (2024-05-31)
Supplement: Table S1 [file 579381_file02.xlsx]

## Sheet: ATF6 Activators Gene List
id	num	neg|score	neg|p-value	neg|fdr	neg|rank	neg|goodsgrna	neg|lfc	pos|score	pos|p-value	pos|fdr	pos|rank	pos|goodsgrna	pos|lfc
Mbtps1	6	1	1	1	21908	0	6.2874	4.5591e-24	2.2597e-07	0.000619	1	6	6.2874
Mbtps2	6	1	1	1	21905	0	6.6365	1.5218e-19	2.2597e-07	0.000619	2	5	6.6365
Nup50	6	1	1	1	21906	0	5.1359	8.5989e-17	2.2597e-07	0.000619	3	5	5.1359
Sp2	6	0.99999	0.99999	1	21898	0	3.844	6.4487e-12	2.2597e-07	0.000619	4	5	3.844
Seh1l	5	1	1	1	21907	0	2.3723	8.294e-11	2.2597e-07	0.000619	5	5	2.3723
Atf6	6	0.74672	0.87858	1	17141	2	0.69695	2.2933e-09	2.2597e-07	0.000619	6	3	0.69695
Cxxc1	6	0.48436	0.72027	1	14101	1	2.2951	2.4414e-08	2.2597e-07	0.000619	7	4	2.2951
Igf1r	6	0.99691	0.99697	1	21231	0	2.6714	2.5424e-08	2.2597e-07	0.000619	8	4	2.6714
Furin	6	0.99999	1	1	21900	0	1.898	1.2247e-07	1.5818e-06	0.00385	9	5	1.898
Sec61a1	6	0.9995	0.99952	1	21641	0	2.5584	1.7097e-07	2.0337e-06	0.00405	10	4	2.5584
Dnajb9	5	0.99986	0.99987	1	21775	0	1.7666	5.5311e-07	2.0337e-06	0.00405	11	3	1.7666
Sec61b	6	0.99999	0.99999	1	21896	0	0.93629	2.1962e-06	1.1976e-05	0.021865	12	3	0.93629
Prmt8	5	0.99944	0.99944	1	21620	0	1.5012	4.4787e-06	1.514e-05	0.025514	13	4	1.5012
Rwdd3	6	0.9924	0.99243	1	20897	0	-5.4637	6.2074e-06	3.5025e-05	0.054809	14	2	-5.4637
Ankrd30a	6	0.17506	0.39972	0.973034	8605	2	-5.7216	6.6969e-06	3.7737e-05	0.055116	15	2	-5.7216
Cnpy2	6	0.40686	0.66362	1	13075	1	0.28029	9.9186e-06	5.0843e-05	0.069616	16	3	0.28029
Slc6a13	6	0.99889	0.99889	1	21496	0	0.39933	2.416e-05	0.00010598	0.127931	17	4	0.39933
Rbm15	6	0.99959	0.99959	1	21676	0	0.37949	2.6074e-05	0.00011095	0.127931	18	4	0.37949
Smad4	5	0.71116	0.83788	1	16836	2	1.1221	3.1757e-05	9.8296e-05	0.126674	19	3	1.1221
Dstn	6	0.45774	0.70094	1	13774	1	0.37249	3.467e-05	0.00015072	0.158641	20	4	0.37249
Tex264	6	0.66889	0.84805	1	16475	1	-5.1053	3.7021e-05	0.0001584	0.158641	21	2	-5.1053
Slc33a1	6	0.99988	0.99988	1	21788	0	0.69733	3.7195e-05	0.00015931	0.158641	22	4	0.69733
Ccdc113	6	0.61823	0.81671	1	15879	2	-2.893	4.1022e-05	0.00017015	0.162075	23	2	-2.893
Ogg1	6	0.99856	0.99857	1	21432	0	0.54407	4.9718e-05	0.00019727	0.180074	24	3	0.54407
Nxf1	4	0.99987	0.99986	1	21783	0	1.4665	8.1052e-05	0.00023614	0.206931	25	3	1.4665
Tmem208	6	0.99981	0.99981	1	21747	0	-1.4144	8.8602e-05	0.00030167	0.253942	26	3	-1.4144
Xbp1	6	0.40628	0.66319	1	13065	2	-2.2365	9.2543e-05	0.00031296	0.253942	27	3	-2.2365
Ccdc116	6	0.84901	0.92572	1	18308	1	-5.2166	0.0001089	0.00036539	0.277692	28	2	-5.2166
Stxbp6	6	0.47391	0.71265	1	13973	3	-2.1012	0.00011334	0.00037578	0.277692	29	3	-2.1012
LOC100754962	6	0.84199	0.92213	1	18228	1	-2.3275	0.000123	0.00039657	0.277692	30	3	-2.3275
LOC103162651	6	0.71832	0.86712	1	16893	1	-3.8407	0.00012461	0.00040019	0.277692	31	1	-3.8407
Ehmt1	6	0.28171	0.5417	1	10934	2	-2.8604	0.00012692	0.00040561	0.277692	32	2	-2.8604
Slc5a10	6	0.99993	0.99993	1	21836	0	0.26142	0.00017624	0.00055385	0.356577	33	3	0.26142
Lmntd1	6	0.71801	0.86699	1	16890	1	-5.3	0.00018136	0.00056966	0.356577	34	2	-5.3
Zbtb2	6	0.99375	0.99377	1	20988	0	-1.9718	0.0002208	0.00066095	0.402228	35	3	-1.9718
Smim8	3	0.99866	0.99868	1	21450	0	1.492	0.0002233	0.00051543	0.342184	36	2	1.492
LOC100768108	5	0.9154	0.93444	1	19135	1	-6.1422	0.00025381	0.00075677	0.448087	37	2	-6.1422
Frmd8	6	0.050423	0.16374	0.775607	4334	4	-5.3329	0.00028795	0.00085574	0.480659	38	2	-5.3329
Camsap1	6	0.63459	0.82812	1	16081	3	-1.5988	0.00030321	0.00089912	0.480659	39	3	-1.5988
Bcl2l13	6	0.016011	0.068211	0.599183	2358	3	-5.6562	0.0003133	0.00092669	0.480659	40	2	-5.6562
LOC100760278	6	0.17803	0.40391	0.974785	8700	1	-1.0197	0.00031555	0.00093076	0.480659	41	2	-1.0197
Stambpl1	6	0.88183	0.94349	1	18766	1	0.1656	0.00032056	0.00094341	0.480659	42	3	0.1656
Rnf151	6	0.41398	0.66885	1	13163	2	-2.4394	0.00041097	0.0012042	0.598233	43	2	-2.4394
Il17rc	6	0.20917	0.44714	0.998239	9432	3	-1.5093	0.00042951	0.0012503	0.598233	44	3	-1.5093
Tada2b	6	0.42394	0.67618	1	13298	2	-3.9188	0.00045585	0.0013104	0.598233	45	2	-3.9188
Unc5a	6	0.36317	0.63122	1	12498	3	-1.5598	0.00046122	0.0013217	0.598233	46	3	-1.5598
LOC100752198	5	0.9785	0.97858	1	20249	0	-1.7492	0.00046726	0.0013759	0.598233	47	2	-1.7492
Tmem201	6	0.22664	0.47069	1	9798	3	-2.6722	0.00047499	0.0013601	0.598233	48	2	-2.6722
Lrrc63	6	0.9454	0.96271	1	19506	1	-1.9359	0.00048437	0.0013859	0.598233	49	3	-1.9359
Carm1	6	0.88092	0.943	1	18747	2	-2.1016	0.00048637	0.0013926	0.598233	50	3	-2.1016
Afap1l1	6	0.5947	0.79999	1	15571	3	-2.1832	0.00051406	0.0014699	0.618625	51	3	-2.1832
LOC100760013	6	0.0172	0.071761	0.606303	2451	3	-6.1879	0.00052327	0.0014966	0.618625	52	1	-6.1879
LOC103161741	5	0.79287	0.88861	1	17628	2	0.23347	0.00055104	0.0016249	0.635697	53	3	0.23347
Tsc22d1	6	0.63067	0.82534	1	16031	2	-2.2376	0.00055269	0.0015786	0.628803	54	3	-2.2376
LOC100765294	6	0.31054	0.5774	1	11567	1	-2.4423	0.00058681	0.0016864	0.648167	55	3	-2.4423
Ttc36	6	0.92434	0.95628	1	19227	1	-0.080873	0.0006069	0.0017325	0.654404	56	3	-0.080873
Zc3h12a	6	0.71364	0.86523	1	16852	2	-2.625	0.00063359	0.0017989	0.658655	57	3	-2.625
Ccdc151	6	0.33377	0.60511	1	12045	3	-2.4225	0.00064602	0.001826	0.658655	58	3	-2.4225
LOC100754671	6	0.41471	0.66939	1	13177	3	-2.4274	0.00065084	0.0018419	0.658655	59	3	-2.4274
Cfap206	6	0.26402	0.51948	1	10552	2	-5.3543	0.00065982	0.001864	0.658655	60	2	-5.3543
Tmed5	6	0.73404	0.87338	1	17024	2	-3.3605	0.00067615	0.001916	0.666274	61	2	-3.3605
Spsb2	6	0.90088	0.95069	1	18987	1	-0.54928	0.00072974	0.0020669	0.700609	62	2	-0.54928
LOC100762307	6	0.26081	0.5154	1	10492	2	-2.8253	0.00073482	0.0020787	0.700609	63	3	-2.8253
Rheb	3	0.99923	0.99923	1	21565	0	1.2057	0.00075087	0.0015305	0.62092	64	2	1.2057
Dmbx1	6	0.20779	0.44527	0.996952	9407	3	-2.5221	0.00075433	0.0021388	0.701714	65	3	-2.5221
Idh3a	6	0.091163	0.26134	0.86637	6212	2	-3.0602	0.00075699	0.002146	0.701714	66	3	-3.0602
Hmgb4	6	0.66648	0.84711	1	16448	1	-1.6156	0.00078067	0.0022147	0.713526	67	3	-1.6156
CTRLX18787	1	0.9992	0.99923	1	21555	0	3.3344	0.00080169	0.00080603	0.464695	68	1	3.3344
LOC100751363	6	0.059906	0.18771	0.801665	4803	3	-4.896	0.00081567	0.0023182	0.72082	69	2	-4.896
Sh3bp2	6	0.05723	0.18106	0.794263	4673	5	-5.3563	0.00082218	0.0023361	0.72082	70	1	-5.3563
Ccdc60	6	0.050375	0.16362	0.775607	4331	3	-5.9099	0.00084842	0.0024154	0.722015	71	2	-5.9099
LOC100774323	6	0.7049	0.86181	1	16772	2	-2.9255	0.00084885	0.0024176	0.722015	72	3	-2.9255
Mrln	5	0.9937	0.99367	1	20985	0	-5.774	0.00084901	0.0023336	0.72082	73	2	-5.774
Fam173a	6	0.86605	0.93476	1	18529	2	-2.5123	0.00085748	0.002447	0.722015	74	3	-2.5123
Ranbp1	6	0.98846	0.98853	1	20677	0	-0.47686	0.00088964	0.0025383	0.722015	75	3	-0.47686
Ehmt2	6	0.9756	0.97729	1	20171	1	-0.0021825	0.00090451	0.0025744	0.722015	76	3	-0.0021825
Znf251	6	0.25642	0.50968	1	10406	2	-5.6171	0.0009218	0.0026237	0.722015	77	1	-5.6171
Sipa1l3	6	0.10529	0.29268	0.889565	6789	3	-2.2457	0.00092535	0.0026314	0.722015	78	2	-2.2457
Adgrg5	6	0.19219	0.42374	0.986152	9031	4	-3.7995	0.00093303	0.0026558	0.722015	79	2	-3.7995
Sec61g	6	0.99962	0.99963	1	21686	0	-2.149	0.00095237	0.0027073	0.722015	80	2	-2.149
Ccdc149	6	0.87579	0.9401	1	18663	2	-1.9803	0.00096187	0.0027333	0.722015	81	3	-1.9803
Prf1	6	0.58791	0.79511	1	15474	1	-5.2347	0.00097583	0.0027715	0.722015	82	2	-5.2347
Pkig	6	0.06727	0.20569	0.819003	5157	2	-0.28592	0.00098066	0.0027837	0.722015	83	3	-0.28592
Myom3	6	0.62363	0.82045	1	15944	2	-0.30034	0.00098824	0.0028013	0.722015	84	3	-0.30034
Ipo4	6	0.064869	0.19993	0.812185	5049	4	-5.9259	0.0010214	0.0028894	0.728158	85	1	-5.9259
Cpne9	6	0.8481	0.92525	1	18297	2	-0.65616	0.0010326	0.002922	0.728158	86	3	-0.65616
LOC100758825	6	0.44101	0.6887	1	13519	3	-2.6081	0.0010615	0.0030079	0.728158	87	3	-2.6081
Glis2	6	0.4127	0.66795	1	13144	2	-2.6734	0.0010641	0.0030169	0.728158	88	3	-2.6734
Sirpa	6	0.21896	0.46033	1	9640	3	-5.2314	0.0010663	0.0030246	0.728158	89	2	-5.2314
Cldn15	5	0.0097853	0.038845	0.517328	1727	3	-5.6266	0.0010688	0.0027114	0.722015	90	2	-5.6266
Znf467	6	0.030048	0.1092	0.689905	3255	2	-2.2469	0.0010963	0.0031172	0.734323	91	3	-2.2469
Hrh1	6	0.73407	0.87339	1	17025	2	-2.2945	0.0011388	0.0032293	0.752633	92	3	-2.2945
Foxred2	6	0.29079	0.55309	1	11151	3	-6.3566	0.0011708	0.0033097	0.763262	93	1	-6.3566
Tagln2	6	0.49328	0.72676	1	14235	3	-2.5507	0.0012161	0.003434	0.765891	94	3	-2.5507
Slc2a6	6	0.1307	0.33433	0.926098	7494	3	-3.8071	0.0012206	0.0034485	0.765891	95	1	-3.8071
LOC100766431	6	0.14573	0.35693	0.944044	7879	4	-5.035	0.001228	0.0034634	0.765891	96	2	-5.035
LOC100773612	6	0.88266	0.94395	1	18776	2	-5.5798	0.001239	0.0034959	0.765891	97	2	-5.5798
Wnt8a	6	0.71073	0.86409	1	16828	1	-3.0325	0.0013202	0.0037291	0.803485	98	1	-3.0325
Cpb1	6	0.23884	0.48676	1	10076	1	-1.7786	0.0013241	0.0037409	0.803485	99	3	-1.7786
Rybp	6	0.52549	0.75029	1	14640	1	-0.29251	0.0013588	0.0038349	0.803895	100	2	-0.29251
Gpr108	6	0.13281	0.3375	0.927777	7547	4	-5.9753	0.00137	0.0038593	0.803895	101	1	-5.9753
Vash1	6	0.42641	0.67799	1	13326	3	-2.8597	0.0013712	0.0038611	0.803895	102	3	-2.8597
Lbp	6	0.16944	0.39169	0.968735	8461	3	-1.7018	0.0014099	0.0039723	0.811109	103	3	-1.7018
Cep72	6	0.16756	0.38898	0.966452	8418	2	-2.2418	0.0014203	0.0040035	0.811109	104	3	-2.2418
R3hdm4	6	0.017218	0.071824	0.606442	2453	3	-1.7823	0.0014331	0.0040356	0.811109	105	3	-1.7823
Stxbp5l	6	0.28374	0.54422	1	10985	3	-5.5835	0.0014696	0.0040943	0.815437	106	1	-5.5835
Klhdc1	6	0.13764	0.34485	0.9348	7666	3	-5.4049	0.00154	0.0042263	0.830413	107	2	-5.4049
Irak1bp1	6	0.0017861	0.0089784	0.335713	555	4	-4.231	0.0015622	0.0042674	0.830413	108	2	-4.231
Cnot9	6	0.7733	0.89002	1	17414	1	-4.5674	0.0015691	0.0042832	0.830413	109	1	-4.5674
Myh7b	6	0.24287	0.492	1	10143	4	-5.1507	0.0016189	0.0043772	0.841193	110	1	-5.1507
Cldn1	6	0.00060575	0.003157	0.240632	280	5	-5.6661	0.0016687	0.0044807	0.853594	111	1	-5.6661
Map3k11	5	0.89435	0.92581	1	18930	1	-5.8403	0.0016918	0.0038896	0.803895	112	2	-5.8403
Ppfia2	6	0.86061	0.93182	1	18456	2	-5.2868	0.0017011	0.0045422	0.856943	113	2	-5.2868
Rasgef1c	6	0.018932	0.076976	0.620681	2563	4	-4.5845	0.0017185	0.0045765	0.856943	114	1	-4.5845
Foxr1	6	0.49741	0.72982	1	14290	2	-6.092	0.0017478	0.0046289	0.8581	115	2	-6.092
LOC100753897	6	0.17614	0.40126	0.973034	8644	4	-5.6755	0.0017682	0.004661	0.8581	116	1	-5.6755
Rep15	6	0.42315	0.67562	1	13290	2	-4.8081	0.001818	0.0047487	0.866955	117	1	-4.8081
Rhof	6	0.0028744	0.01413	0.377516	782	4	-5.5997	0.0018678	0.0048463	0.876197	118	1	-5.5997
Izumo2	6	0.099243	0.27945	0.88253	6527	4	-5.868	0.0019175	0.0049367	0.879296	119	1	-5.868
LOC100774329	6	0.18627	0.41552	0.981746	8889	4	-5.7771	0.0019673	0.0050407	0.881777	120	1	-5.7771
Ghrh	6	0.20027	0.43495	0.992409	9228	2	-5.5221	0.0019684	0.005042	0.881777	121	2	-5.5221
Rtkn2	6	0.0048971	0.023208	0.439506	1104	3	-3.1074	0.001985	0.0050714	0.881777	122	2	-3.1074
Rad9b	6	0.99265	0.99267	1	20912	0	-3.8414	0.0020171	0.0051261	0.884268	123	2	-3.8414
Adarb2	6	0.024894	0.094556	0.660354	2953	4	-5.5085	0.0020382	0.0051667	0.884321	124	2	-5.5085
Ears2	6	0.99514	0.99519	1	21086	0	-5.6931	0.0020668	0.0052174	0.886062	125	1	-5.6931
Chd3	6	0.8119	0.90746	1	17876	2	-5.7045	0.0021005	0.0052725	0.886139	126	2	-5.7045
Sall3	6	0.020092	0.080511	0.629488	2637	4	-6.2243	0.0021166	0.0052987	0.886139	127	1	-6.2243
LOC100766653	6	0.18052	0.4074	0.977628	8756	4	-4.9063	0.0021664	0.0053868	0.888595	128	1	-4.9063
Grip2	6	0.1032	0.28802	0.886637	6703	3	-2.3489	0.0021696	0.0053945	0.888595	129	2	-2.3489
LOC100774861	6	0.99814	0.99814	1	21382	0	-2.8707	0.0022161	0.0054804	0.896003	130	1	-2.8707
LOC107977713	6	0.27412	0.53221	1	10772	4	-5.7471	0.0023654	0.0057393	0.898943	131	2	-5.7471
Fbxo36	6	0.87794	0.94131	1	18700	2	-5.2732	0.0024649	0.0059237	0.898943	132	2	-5.2732
Mtmr14	6	0.60986	0.81069	1	15759	3	-4.8407	0.0025146	0.0060195	0.898943	133	2	-4.8407
Zg16	6	0.14309	0.35302	0.941396	7805	3	-5.8428	0.0025249	0.006044	0.898943	134	2	-5.8428
Pik3r6	6	0.2145	0.45444	1	9557	2	-3.8009	0.0026141	0.0062003	0.898943	135	1	-3.8009
Fbxo39	6	0.16683	0.38795	0.965271	8400	3	-5.8917	0.0026416	0.0062518	0.898943	136	2	-5.8917
Trim56	6	0.87309	0.93862	1	18624	1	-4.6082	0.0026512	0.0062672	0.898943	137	2	-4.6082
Bcas3	6	0.39584	0.65553	1	12916	3	-4.8131	0.0026638	0.0062934	0.898943	138	1	-4.8131
LOC100759962	6	0.13214	0.33648	0.92666	7530	3	-5.5613	0.0027136	0.0063915	0.898943	139	1	-5.5613
LOC100755736	6	0.33747	0.60945	1	12125	3	-4.8504	0.0027381	0.0064308	0.898943	140	2	-4.8504
LOC100755805	6	0.026746	0.099835	0.67305	3058	3	-5.4221	0.0027479	0.0064502	0.898943	141	2	-5.4221
Creld1	6	0.075972	0.22637	0.841284	5546	4	-5.5752	0.002813	0.0065474	0.898943	142	2	-5.5752
Hamp	6	0.16697	0.38815	0.965605	8404	4	-4.2367	0.0028264	0.0065723	0.898943	143	2	-4.2367
LOC100763561	6	0.042518	0.14318	0.746958	3944	3	-5.0461	0.0028363	0.0065921	0.898943	144	2	-5.0461
Dcdc2	6	0.014006	0.060809	0.579223	2169	5	-6.1391	0.0028627	0.0066355	0.898943	145	1	-6.1391
Klhl30	6	0.23152	0.47718	1	9915	3	-5.7344	0.0028694	0.0066473	0.898943	146	2	-5.7344
Surf2	6	0.19149	0.42279	0.985409	9015	3	-5.7988	0.0029161	0.0067187	0.898943	147	2	-5.7988
Serpinf1	6	0.27343	0.53135	1	10757	4	-5.9168	0.0029622	0.0068023	0.898943	148	1	-5.9168
Asic5	5	0.52041	0.7338	1	14592	2	-2.7184	0.0029623	0.0061931	0.898943	149	2	-2.7184
CTRLX17949	1	0.99702	0.99706	1	21241	0	1.7149	0.0029783	0.0029491	0.728158	150	1	1.7149
LOC100773877	5	0.80215	0.89474	1	17746	2	-6.4444	0.0030079	0.0062835	0.898943	151	1	-6.4444
Ptpru	6	0.017786	0.073549	0.610808	2494	3	-3.4997	0.0030547	0.0069822	0.898943	152	2	-3.4997
LOC100758506	6	0.48033	0.71734	1	14062	3	-5.5113	0.0030616	0.0069975	0.898943	153	2	-5.5113
Morf4l2	5	0.98914	0.98916	1	20713	0	-4.4814	0.0030653	0.0063883	0.898943	154	2	-4.4814
LOC107977693	6	0.15622	0.37242	0.953933	8143	4	-4.668	0.0030856	0.0070427	0.898943	155	2	-4.668
Ppm1k	6	0.081064	0.23822	0.850895	5769	3	-3.0654	0.0030959	0.007064	0.898943	156	2	-3.0654
LOC100758265	6	0.010348	0.046352	0.539867	1781	4	-5.7814	0.0031097	0.0070857	0.898943	157	2	-5.7814
CTRLX14775	1	0.99687	0.99692	1	21228	0	1.9885	0.0031279	0.0030928	0.734323	158	1	1.9885
Asb16	6	0.071372	0.21552	0.828773	5343	4	-5.3413	0.0031547	0.0071589	0.898943	159	2	-5.3413
Maf1	6	0.30091	0.5656	1	11360	3	-5.4997	0.0031611	0.0071706	0.898943	160	1	-5.4997
LOC100762081	5	0.16517	0.37407	0.955911	8360	2	-6.1542	0.0031728	0.0065768	0.898943	161	2	-6.1542
Irak1	6	0.55044	0.76821	1	14954	1	-3.2169	0.0032	0.0072321	0.898943	162	2	-3.2169
Ssr2	6	0.66444	0.84633	1	16430	1	-2.8958	0.0032035	0.0072371	0.898943	163	2	-2.8958
Cd59	6	0.50604	0.73619	1	14402	3	-5.5788	0.0032108	0.0072556	0.898943	164	1	-5.5788
Coro7	6	0.32457	0.59428	1	11860	4	-4.9382	0.003235	0.0072963	0.898943	165	2	-4.9382
Mroh8	5	0.85876	0.91388	1	18433	1	-4.8098	0.0032359	0.0066984	0.898943	166	2	-4.8098
LOC100769403	6	0.6193	0.81746	1	15890	3	-5.982	0.0032605	0.0073392	0.898943	167	1	-5.982
Fam104a	6	0.048323	0.15833	0.768693	4227	3	-6.2175	0.0032915	0.0073916	0.898943	168	2	-6.2175
E2f8	6	0.71743	0.86676	1	16884	2	-5.3189	0.0033102	0.0074214	0.898943	169	1	-5.3189
Sik3	6	0.21205	0.45107	0.999675	9508	4	-5.4229	0.0033378	0.007473	0.898943	170	2	-5.4229
LOC107977034	6	0.26282	0.51796	1	10527	3	-6.7146	0.0033599	0.0075222	0.898943	171	1	-6.7146
LOC100761801	6	0.17672	0.40204	0.973491	8662	4	-5.986	0.0033879	0.0075593	0.898943	172	2	-5.986
Pogz	6	0.49912	0.73107	1	14317	2	-4.3938	0.0034096	0.0076031	0.898943	173	1	-4.3938
Ift122	6	0.12077	0.31904	0.912111	7235	4	-4.4336	0.0034131	0.0076126	0.898943	174	2	-4.4336
LOC100762476	6	0.8585	0.93072	1	18428	2	-2.3569	0.0034239	0.007633	0.898943	175	2	-2.3569
Tst	6	0.81403	0.90844	1	17894	2	-4.5008	0.003442	0.007665	0.898943	176	2	-4.5008
Fam8a1	6	0.043741	0.14642	0.753509	3996	3	-6.5279	0.0034593	0.0076935	0.898943	177	1	-6.5279
CTRLX04697	1	0.99654	0.99659	1	21196	0	1.916	0.0034602	0.0034223	0.765891	178	1	1.916
Aimp2	6	0.19328	0.42524	0.987503	9056	2	-3.2194	0.003471	0.0077166	0.898943	179	2	-3.2194
Bfsp2	6	0.10449	0.29088	0.887789	6763	4	-5.7181	0.003509	0.0077794	0.898943	180	1	-5.7181
LOC100760802	6	0.45876	0.70167	1	13784	2	-5.7761	0.0035148	0.0077907	0.898943	181	2	-5.7761
LOC103164596	6	0.99952	0.99953	1	21647	0	-2.6859	0.0035258	0.0078051	0.898943	182	2	-2.6859
LOC107977558	6	0.81429	0.90856	1	17898	2	-5.0251	0.0035405	0.0078372	0.898943	183	2	-5.0251
Tnfsf10	6	0.051638	0.16694	0.778861	4396	4	-4.8354	0.0036581	0.0080451	0.903485	184	1	-4.8354
Mllt10	6	0.55098	0.76859	1	14966	2	-2.2967	0.0037037	0.0081233	0.903485	185	2	-2.2967
Rprd2	6	0.086442	0.25061	0.859047	6003	3	-3.0966	0.0037075	0.0081301	0.903485	186	2	-3.0966
Dclk2	6	0.010299	0.046132	0.538443	1777	4	-6.2648	0.0037078	0.008131	0.903485	187	2	-6.2648
Cryga	5	0.19359	0.41785	0.98286	9062	3	-5.5322	0.003734	0.0075882	0.898943	188	2	-5.5322
Ctsw	6	0.44502	0.69164	1	13577	2	-5.4411	0.0037489	0.0081992	0.903485	189	2	-5.4411
Nkain2	5	0.66029	0.80841	1	16389	2	-5.33	0.0037536	0.0076171	0.898943	190	1	-5.33
LOC100766051	6	0.82105	0.91176	1	17970	2	-5.3261	0.0037575	0.008211	0.903485	191	1	-5.3261
Wif1	6	0.573	0.78435	1	15260	2	-2.0917	0.0037602	0.008216	0.903485	192	2	-2.0917
LOC100766960	4	0.39041	0.58969	1	12843	2	-5.2367	0.0037664	0.007397	0.898943	193	1	-5.2367
LOC100759873	5	0.23007	0.45712	1	9884	2	-5.369	0.0038458	0.007792	0.898943	194	2	-5.369
Pcnx2	6	0.38575	0.64807	1	12784	2	-3.177	0.0038628	0.0084139	0.903485	195	2	-3.177
Med29	6	0.85094	0.92676	1	18333	1	-5.1111	0.0039746	0.0086218	0.903485	196	2	-5.1111
Nalcn	6	0.21256	0.45177	1	9520	4	-4.1596	0.0040057	0.0086692	0.903485	197	2	-4.1596
Sipa1l1	6	0.10254	0.28661	0.88605	6671	4	-5.7668	0.0040556	0.008751	0.903485	198	1	-5.7668
LOC103159607	6	0.30955	0.57618	1	11543	3	-4.9591	0.0041053	0.0088383	0.903485	199	1	-4.9591
Ssr1	6	0.66152	0.84524	1	16398	2	-2.1742	0.004143	0.0089106	0.903485	200	2	-2.1742
LOC107977665	6	0.99321	0.99325	1	20950	0	-4.8917	0.004155	0.0089332	0.903485	201	1	-4.8917
LOC100774487	6	0.99154	0.99155	1	20852	0	-1.2586	0.0041787	0.008977	0.903485	202	2	-1.2586
Tmem81	6	0.36359	0.63153	1	12505	2	-4.8947	0.0041986	0.0090086	0.903485	203	2	-4.8947
Dmwd	6	0.013851	0.060192	0.577584	2155	5	-6.2342	0.0042046	0.0090181	0.903485	204	1	-6.2342
LOC100772835	6	0.9865	0.98656	1	20571	0	-5.2669	0.0042185	0.0090453	0.903485	205	2	-5.2669
Slc25a31	6	0.00022429	0.0011933	0.170443	148	3	-2.6525	0.0042465	0.0090954	0.903485	206	2	-2.6525
Kcnk12	6	0.14716	0.35903	0.944887	7913	2	-5.6204	0.0042543	0.0091103	0.903485	207	1	-5.6204
Lcn10	6	0.041411	0.14024	0.743888	3880	4	-2.8444	0.0042706	0.0091442	0.903485	208	2	-2.8444
LOC100759732	6	0.031326	0.11278	0.697347	3332	3	-3.5236	0.0043472	0.0092848	0.903485	209	2	-3.5236
LOC100756292	5	0.62873	0.7908	1	16001	2	-0.98803	0.004362	0.0087411	0.903485	210	2	-0.98803
Gdpgp1	6	0.40751	0.6641	1	13086	3	-5.9405	0.0044033	0.009386	0.903485	211	1	-5.9405
Nkx2-8	6	0.91881	0.95489	1	19171	1	-5.351	0.0044858	0.0095356	0.903485	212	2	-5.351
Arrdc1	4	0.99197	0.99197	1	20874	0	-2.8607	0.0045332	0.0088374	0.903485	213	2	-2.8607
Ubac1	6	0.47759	0.71538	1	14025	3	-5.4137	0.0045523	0.0096477	0.903485	214	1	-5.4137
Prkd2	6	0.078851	0.23305	0.845935	5681	3	-5.6304	0.0045767	0.0096897	0.903485	215	2	-5.6304
Usp46	6	0.94933	0.96415	1	19577	1	-5.1802	0.0046057	0.0097408	0.903485	216	2	-5.1802
Ppp2r5b	6	0.11064	0.30341	0.895104	6996	2	-4.6971	0.0046516	0.0098244	0.903485	217	1	-4.6971
LOC100751403	6	0.013753	0.059814	0.576944	2140	3	-5.4689	0.0046516	0.0098244	0.903485	218	2	-5.4689
LOC100774460	4	0.37385	0.57782	1	12639	2	-3.3668	0.0046608	0.009076	0.903485	219	1	-3.3668
Vps11	6	0.57944	0.78895	1	15361	3	-4.8097	0.0046642	0.0098483	0.903485	220	2	-4.8097
Nanp	5	0.46484	0.69121	1	13861	2	-6.1952	0.0047471	0.0094466	0.903485	221	1	-6.1952
Clhc1	6	0.89369	0.9492	1	18925	1	-5.6397	0.0047509	0.01001	0.903485	222	1	-5.6397
Cftr	6	0.57503	0.78577	1	15293	2	-5.754	0.0047651	0.010039	0.903485	223	2	-5.754
LOC100761941	4	0.1255	0.27611	0.879276	7359	1	-4.8435	0.0047932	0.009344	0.903485	224	1	-4.8435
Tmem53	6	0.98909	0.98912	1	20711	0	-0.18755	0.004816	0.010127	0.903485	225	2	-0.18755
Cops7b	6	0.26772	0.52421	1	10628	3	-4.5081	0.0048245	0.010144	0.903485	226	2	-4.5081
Mxra8	6	0.26761	0.52408	1	10623	4	-6.0754	0.0048458	0.010182	0.903485	227	2	-6.0754
Ephb3	6	0.31116	0.57819	1	11583	3	-4.772	0.0048629	0.010212	0.903485	228	2	-4.772
Prrg1	5	0.24837	0.4766	1	10246	3	-6.2218	0.0048811	0.0096906	0.903485	229	2	-6.2218
Aco2	6	0.94579	0.96284	1	19520	1	-2.6979	0.0048928	0.010259	0.903485	230	2	-2.6979
Odf3b	6	0.279	0.53835	1	10877	2	-5.4042	0.0049185	0.010307	0.903485	231	2	-5.4042
R3hcc1l	6	0.74105	0.87622	1	17085	2	-4.7353	0.0049495	0.010364	0.903485	232	1	-4.7353
CTRLX14864	1	0.99504	0.99507	1	21076	0	1.8234	0.0049556	0.0048793	0.876197	233	1	1.8234
Ccdc7	6	0.57012	0.78227	1	15218	1	-2.4915	0.0049991	0.010451	0.903485	234	1	-2.4915
Erp44	5	0.091014	0.2383	0.850895	6206	2	-4.9228	0.0050368	0.0099912	0.903485	235	1	-4.9228
Syncrip	5	0.37486	0.60551	1	12655	1	-5.0937	0.0050401	0.009997	0.903485	236	2	-5.0937
LOC100754055	6	0.35041	0.62175	1	12320	3	-4.4403	0.0050487	0.010534	0.903485	237	1	-4.4403
Cnbd1	4	0.97802	0.97811	1	20235	0	-2.4523	0.0050912	0.0098859	0.903485	238	1	-2.4523
Bsn	6	0.41101	0.66668	1	13126	3	-5.685	0.0051004	0.010617	0.903485	239	2	-5.685
Kiaa0930	6	0.34065	0.61314	1	12182	4	-5.9208	0.005148	0.010702	0.903485	240	1	-5.9208
Grb7	6	0.74758	0.87894	1	17152	2	-4.3232	0.0051661	0.010733	0.903485	241	2	-4.3232
Cdip1	6	0.89205	0.94887	1	18917	1	-2.8206	0.0051969	0.010796	0.903485	242	2	-2.8206
Mcu	6	0.99421	0.99423	1	21018	0	-5.7832	0.0051976	0.010797	0.903485	243	1	-5.7832
Atrx	6	0.030388	0.11016	0.692332	3271	1	-5.4269	0.0052473	0.010878	0.903485	244	1	-5.4269
Cxcl12	6	0.93624	0.95968	1	19362	1	-3.3396	0.0053465	0.01105	0.903485	245	1	-3.3396
Als2cl	6	0.086583	0.25092	0.859047	6009	4	-4.7103	0.0053522	0.01106	0.903485	246	2	-4.7103
LOC100760332	5	0.32196	0.55272	1	11800	3	-4.9572	0.0053677	0.010617	0.903485	247	1	-4.9572
Lypd3	6	0.53478	0.75701	1	14757	1	-5.2869	0.005388	0.011124	0.903485	248	2	-5.2869
Klhl17	6	0.10774	0.29793	0.892166	6892	5	-5.549	0.0053962	0.011137	0.903485	249	1	-5.549
Rab43	6	0.021904	0.085857	0.640431	2765	3	-5.1809	0.0054104	0.011164	0.903485	250	2	-5.1809
Rab40c	6	0.28001	0.53963	1	10891	4	-5.0386	0.0054284	0.011193	0.903485	251	2	-5.0386
LOC100762656	6	0.15239	0.36677	0.951484	8042	4	-5.2965	0.0054954	0.011314	0.903485	252	1	-5.2965
LOC100761566	6	0.99775	0.99778	1	21325	0	-2.6464	0.0055141	0.01135	0.903485	253	2	-2.6464
Traf3	6	0.014765	0.063753	0.590294	2235	4	-5.2793	0.005545	0.0114	0.903485	254	1	-5.2793
Ahdc1	6	0.05376	0.17228	0.786426	4495	4	-5.9469	0.0055823	0.011468	0.903485	255	2	-5.9469
Atp5g1	6	0.46218	0.70413	1	13824	2	-5.5793	0.0055946	0.011488	0.903485	256	2	-5.5793
Khk	6	0.090264	0.25929	0.86545	6170	3	-3.5468	0.005628	0.011549	0.903485	257	2	-3.5468
Slmap	6	0.11627	0.31212	0.904399	7130	3	-4.5515	0.0056463	0.011583	0.903485	258	2	-4.5515
Por	6	0.2212	0.46332	1	9680	3	-5.1901	0.0057198	0.011712	0.903485	259	2	-5.1901
Hesx1	6	0.17862	0.40472	0.975953	8707	3	-3.199	0.0057336	0.011734	0.903485	260	2	-3.199
Pir	6	0.25891	0.51292	1	10457	2	-4.0741	0.0057435	0.011751	0.903485	261	1	-4.0741
Napsa	6	0.96598	0.97146	1	19898	1	-5.6539	0.0057567	0.01178	0.903485	262	2	-5.6539
Maea	6	0.87757	0.94111	1	18694	2	-5.3106	0.0057931	0.011845	0.903485	263	2	-5.3106
LOC100762114	6	0.077085	0.22896	0.843997	5595	2	-4.5115	0.005817	0.01189	0.903485	264	2	-4.5115
LOC103162688	6	0.01104	0.049105	0.54927	1847	1	-5.6647	0.0058427	0.01193	0.903485	265	1	-5.6647
Mapk8ip1	6	0.27484	0.53315	1	10790	2	-5.5593	0.0058729	0.011994	0.903485	266	2	-5.5593
Srpk3	6	0.27608	0.5347	1	10810	3	-5.855	0.0058923	0.012034	0.903485	267	1	-5.855
Micall2	6	0.98589	0.98599	1	20543	0	-5.1316	0.0059419	0.01212	0.903485	268	1	-5.1316
Rtn3	6	0.34214	0.61485	1	12207	1	-1.5173	0.0059572	0.012145	0.903485	269	2	-1.5173
LOC100770415	6	0.57908	0.78869	1	15356	2	-5.607	0.0059915	0.012211	0.903485	270	1	-5.607
CTRLX01635	1	0.99401	0.99403	1	21003	0	1.2887	0.005994	0.0059373	0.898943	271	1	1.2887
Znf24	5	0.5761	0.76245	1	15309	2	-3.5322	0.0060759	0.011892	0.903485	272	2	-3.5322
LOC107976971	6	0.99998	0.99999	1	21890	0	-2.6704	0.0060907	0.012381	0.903485	273	1	-2.6704
Foxo4	6	0.0001039	0.00055972	0.127733	96	4	-5.9888	0.0061403	0.012477	0.903485	274	1	-5.9888
Acpp	6	0.75113	0.88043	1	17186	1	-5.2703	0.0061609	0.012522	0.903485	275	2	-5.2703
Gpx8	4	0.56769	0.72063	1	15192	2	-4.8873	0.0061832	0.011872	0.903485	276	1	-4.8873
Zfhx4	6	0.042279	0.14251	0.746958	3928	5	-5.3942	0.0061898	0.012578	0.903485	277	1	-5.3942
Klhdc4	6	0.13341	0.33839	0.929095	7557	3	-3.6906	0.0062039	0.012603	0.903485	278	2	-3.6906
Cldn6	6	0.27014	0.52726	1	10681	3	-5.7464	0.0062087	0.01261	0.903485	279	2	-5.7464
Slc1a3	6	0.0027091	0.013412	0.374291	752	5	-5.4919	0.0062394	0.012676	0.903485	280	1	-5.4919
LOC100750833	5	0.99781	0.99782	1	21335	0	-0.99597	0.0062403	0.012197	0.903485	281	2	-0.99597
LOC100762681	6	0.022301	0.087001	0.643412	2790	4	-3.0248	0.0062423	0.01268	0.903485	282	2	-3.0248
Ergic2	6	0.67799	0.85141	1	16552	2	-5.9355	0.006289	0.012753	0.903485	283	1	-5.9355
Dagla	6	0.24401	0.49352	1	10166	4	-5.922	0.0063386	0.012846	0.903485	284	1	-5.922
Rbm12b	6	0.10115	0.28357	0.884412	6608	2	-3.3771	0.0063882	0.012936	0.903485	285	1	-3.3771
LOC100774078	5	0.84921	0.91109	1	18310	1	-2.6994	0.0064013	0.012518	0.903485	286	1	-2.6994
Sec63	5	0.85563	0.91294	1	18392	1	-0.99597	0.0064348	0.012572	0.903485	287	2	-0.99597
LOC100766914	6	0.18665	0.41606	0.982007	8894	4	-5.9455	0.0064456	0.013047	0.903485	288	2	-5.9455
Szrd1	5	0.31505	0.54581	1	11674	2	-4.3188	0.0064839	0.012661	0.903485	289	1	-4.3188
Rftn1	6	0.37136	0.63731	1	12609	3	-5.3267	0.0064896	0.013131	0.903485	290	2	-5.3267
Pls1	6	0.8411	0.92169	1	18216	2	-3.6896	0.0065042	0.013157	0.903485	291	2	-3.6896
Jagn1	6	0.023248	0.08981	0.649461	2853	4	-4.9127	0.0065369	0.013223	0.903485	292	2	-4.9127
LOC100755523	6	0.56525	0.77876	1	15161	3	-3.833	0.0065828	0.013296	0.903485	293	2	-3.833
LOC100760357	5	0.019923	0.074191	0.612529	2627	1	-2.3454	0.0066078	0.012884	0.903485	294	2	-2.3454
Pdlim2	6	0.0056829	0.026665	0.463619	1204	5	-7.0461	0.0066361	0.013393	0.903485	295	1	-7.0461
LOC100755916	6	0.72941	0.87149	1	16997	2	-3.3243	0.0066856	0.013478	0.903485	296	1	-3.3243
Rabgap1	6	0.8456	0.92392	1	18258	1	-2.3863	0.0067015	0.013507	0.903485	297	2	-2.3863
Sntn	6	0.30349	0.56877	1	11417	1	-5.5965	0.0067352	0.013568	0.903485	298	1	-5.5965
Btbd16	6	0.86471	0.93404	1	18511	2	-5.3928	0.0067463	0.013587	0.903485	299	2	-5.3928
Slc39a9	6	0.60105	0.80449	1	15667	3	-5.7559	0.0067513	0.013592	0.903485	300	2	-5.7559
LOC103162549	6	0.24951	0.50062	1	10267	2	-3.0901	0.0067613	0.013611	0.903485	301	2	-3.0901
Mif	6	0.94843	0.96383	1	19559	1	-5.833	0.0067848	0.013652	0.903485	302	1	-5.833
Kmt2c	6	0.9537	0.96584	1	19654	1	-2.5599	0.0068112	0.013702	0.903485	303	2	-2.5599
Pip	6	0.058084	0.1832	0.795926	4721	2	-5.3596	0.0068212	0.013716	0.903485	304	2	-5.3596
LOC100770860	6	0.17041	0.39311	0.969393	8487	3	-4.9818	0.0068343	0.013736	0.903485	305	2	-4.9818
Atp8b3	6	0.59618	0.80104	1	15586	2	-5.2331	0.0069016	0.013858	0.903485	306	2	-5.2331
LOC100754527	6	0.21696	0.4577	1	9600	3	-4.3681	0.0069066	0.013865	0.903485	307	2	-4.3681
Stab1	6	0.40073	0.65913	1	12988	3	-3.3974	0.0069318	0.013907	0.903485	308	2	-3.3974
P2ry2	6	0.04243	0.14293	0.746958	3939	4	-5.4139	0.0069773	0.013976	0.903485	309	2	-5.4139
Azin1	5	0.70499	0.83425	1	16773	1	-2.7174	0.0069797	0.013545	0.903485	310	1	-2.7174
Wdr6	6	0.87801	0.94135	1	18702	2	-5.5331	0.0069976	0.01401	0.903485	311	2	-5.5331
Mybphl	6	0.44187	0.68933	1	13538	2	-6.0876	0.0070326	0.014068	0.903485	312	1	-6.0876
Snx22	6	0.11971	0.31746	0.910265	7216	3	-5.7592	0.0070382	0.014076	0.903485	313	2	-5.7592
LOC100757622	6	0.73527	0.87387	1	17037	2	-5.143	0.0070534	0.014109	0.903485	314	2	-5.143
Paxip1	6	0.51471	0.74252	1	14518	2	-4.2995	0.0070738	0.014144	0.903485	315	2	-4.2995
Mllt6	6	0.23537	0.48222	1	9997	4	-4.9747	0.0071095	0.014204	0.903485	316	2	-4.9747
Serinc4	6	0.028614	0.10518	0.680889	3179	3	-5.5423	0.0071317	0.014242	0.903485	317	1	-5.5423
Dpy19l1	6	0.98999	0.99002	1	20767	0	-5.505	0.0071812	0.014325	0.903485	318	2	-5.505
LOC100764122	5	0.23705	0.46461	1	10036	1	-1.3617	0.0071985	0.013919	0.903485	319	2	-1.3617
Stx11	6	0.78391	0.89472	1	17522	2	-2.0226	0.0072171	0.014387	0.903485	320	2	-2.0226
LOC100764815	6	0.9606	0.96877	1	19795	1	-5.3144	0.0072308	0.014412	0.903485	321	1	-5.3144
Coasy	6	0.74952	0.87976	1	17175	1	-4.5879	0.0072803	0.014506	0.903485	322	1	-4.5879
Csad	6	0.29866	0.5628	1	11314	2	-5.3	0.0073151	0.014572	0.903485	323	2	-5.3
LOC103161395	6	0.14314	0.35312	0.941396	7806	4	-4.9336	0.0073298	0.0146	0.903485	324	1	-4.9336
Cdkal1	5	0.14988	0.34768	0.937243	7983	4	-5.9759	0.0073514	0.014182	0.903485	325	1	-5.9759
Nptn	6	0.99482	0.99486	1	21053	0	-4.9387	0.0073514	0.014635	0.903485	326	2	-4.9387
Bmper	6	0.53571	0.75766	1	14772	3	-4.0379	0.0073794	0.014694	0.903485	327	1	-4.0379
LOC107980088	6	0.74699	0.8787	1	17145	2	-2.8273	0.007393	0.014715	0.903485	328	2	-2.8273
Etv3	5	0.79192	0.88799	1	17619	1	-1.5796	0.0073936	0.014252	0.903485	329	2	-1.5796
Ubl7	6	0.36114	0.62968	1	12465	3	-4.9151	0.0073982	0.014728	0.903485	330	2	-4.9151
Bmp1	6	0.30405	0.56947	1	11425	2	-6.1569	0.0074034	0.014737	0.903485	331	2	-6.1569
Plac9	6	0.18481	0.41346	0.981224	8851	3	-4.5809	0.0074289	0.014781	0.903485	332	1	-4.5809
Vit	5	0.06874	0.19288	0.805366	5225	3	-5.7315	0.0074492	0.014348	0.903485	333	2	-5.7315
Kcnj11	6	0.060511	0.18922	0.801665	4844	4	-6.0528	0.0074503	0.014815	0.903485	334	2	-6.0528
Ccdc183	6	0.32137	0.59041	1	11788	3	-3.654	0.0074764	0.014864	0.903485	335	2	-3.654
Kdm6b	6	0.508	0.73763	1	14432	2	-3.1627	0.0074868	0.014879	0.903485	336	2	-3.1627
LOC103158573	6	0.68456	0.85395	1	16603	1	-5.8719	0.007528	0.014959	0.903485	337	1	-5.8719
CTRLX05581	1	0.99247	0.99244	1	20903	0	1.763	0.0075309	0.0074797	0.898943	338	1	1.763
Klhl2	6	0.23514	0.48192	1	9993	2	-4.7357	0.007555	0.015008	0.903485	339	2	-4.7357
Alox15b	6	0.039967	0.13639	0.735875	3810	5	-5.981	0.0075775	0.01505	0.903485	340	1	-5.981
Ppp1r42	5	0.57499	0.76188	1	15292	2	-4.6298	0.0076474	0.014712	0.903485	341	2	-4.6298
Clnk	6	0.46807	0.70843	1	13897	3	-5.3784	0.0077261	0.0153	0.903485	342	1	-5.3784
LOC100773429	6	0.53901	0.75997	1	14823	2	-2.6644	0.0077346	0.015315	0.903485	343	2	-2.6644
LOC100766772	3	0.90416	0.90422	1	19026	0	-6.2636	0.0077435	0.012454	0.903485	344	1	-6.2636
Klhl24	6	0.11865	0.31579	0.908363	7191	3	-2.9792	0.0078251	0.015471	0.903485	345	2	-2.9792
Ptprh	6	0.10584	0.29383	0.889992	6812	3	-4.7232	0.0078252	0.015471	0.903485	346	1	-4.7232
Khsrp	6	0.16743	0.3888	0.966452	8413	4	-5.5303	0.0078679	0.015543	0.903485	347	2	-5.5303
CTRL00103	1	0.99213	0.99211	1	20881	0	1.2862	0.0078716	0.0078255	0.898943	348	1	1.2862
Arhgap15	4	0.82913	0.86599	1	18065	1	-3.0889	0.007872	0.014947	0.903485	349	2	-3.0889
Adra1b	6	0.0056894	0.026697	0.463619	1205	4	-5.7128	0.0078733	0.015552	0.903485	350	2	-5.7128
Sec24b	6	0.066485	0.20379	0.817081	5121	2	-5.0585	0.0078747	0.015554	0.903485	351	2	-5.0585
LOC100753264	6	0.083723	0.24437	0.856579	5876	3	-1.9949	0.0078894	0.015582	0.903485	352	2	-1.9949
Vgll4	6	0.016943	0.070984	0.604871	2430	3	-2.6381	0.0079242	0.01564	0.903485	353	2	-2.6381
Ankrd61	6	0.29156	0.55409	1	11160	3	-3.7757	0.0079269	0.015646	0.903485	354	2	-3.7757
Tprg1	6	0.5288	0.7527	1	14682	2	-1.8235	0.0079538	0.015688	0.903485	355	2	-1.8235
Fbxo10	6	0.49347	0.72689	1	14238	2	-5.5826	0.0080077	0.015775	0.903485	356	2	-5.5826
Rbm18	6	0.59033	0.79686	1	15508	3	-4.9703	0.0080727	0.015892	0.903485	357	1	-4.9703
Siah1	6	0.069079	0.21003	0.822729	5235	1	-3.3146	0.0080834	0.015909	0.903485	358	2	-3.3146
LOC100773903	6	0.89248	0.94896	1	18920	1	-5.8394	0.0080943	0.015924	0.903485	359	2	-5.8394
Ccdc137	6	0.66371	0.84606	1	16428	2	-5.4954	0.0081222	0.015969	0.903485	360	1	-5.4954
LOC100770736	6	0.13409	0.33942	0.929838	7576	4	-5.5473	0.0081486	0.016013	0.903485	361	2	-5.5473
LOC100755549	6	0.0063882	0.029762	0.479053	1307	2	-3.0585	0.0081541	0.016021	0.903485	362	2	-3.0585
LOC100771492	6	0.9874	0.98744	1	20620	0	-4.8868	0.0081718	0.016048	0.903485	363	1	-4.8868
Scnn1a	6	0.88562	0.94565	1	18819	2	-2.4166	0.0081922	0.016084	0.903485	364	2	-2.4166
LOC100760414	6	0.056133	0.17833	0.790514	4618	4	-5.9108	0.0082031	0.016105	0.903485	365	2	-5.9108
Slc43a2	5	0.31581	0.54664	1	11684	2	-0.4263	0.0082209	0.015782	0.903485	366	2	-0.4263
LOC100770078	6	0.18212	0.40967	0.97954	8786	4	-6.8246	0.0082213	0.016135	0.903485	367	1	-6.8246
Nup85	6	0.99996	0.99996	1	21862	0	-4.7835	0.0082708	0.016217	0.903485	368	1	-4.7835
Lalba	5	0.93943	0.94682	1	19409	1	-2.3454	0.0082748	0.015878	0.903485	369	2	-2.3454
Zbtb7a	6	0.037508	0.12973	0.723732	3677	1	-4.6997	0.0082907	0.01626	0.903485	370	2	-4.6997
LOC100757097	5	0.45272	0.67994	1	13698	3	-6.0212	0.0083108	0.015946	0.903485	371	2	-6.0212
Tenm4	6	0.93674	0.95984	1	19368	1	-6.4111	0.0083203	0.016309	0.903485	372	1	-6.4111
LOC100774003	6	0.60854	0.80981	1	15743	2	-5.6523	0.0083732	0.01639	0.903485	373	2	-5.6523
Bspry	6	0.68529	0.85423	1	16611	2	-4.7479	0.0083842	0.016411	0.903485	374	2	-4.7479
Rcn3	6	0.04621	0.15282	0.760245	4126	3	-4.8214	0.0084008	0.016437	0.903485	375	2	-4.8214
Rapgef5	6	0.086843	0.25149	0.859137	6026	4	-5.1924	0.0084193	0.016466	0.903485	376	1	-5.1924
Ska1	6	0.91754	0.95457	1	19151	1	-1.6882	0.0084616	0.016539	0.903485	377	2	-1.6882
Figla	6	0.036281	0.1264	0.721111	3602	4	-4.7312	0.0084688	0.016555	0.903485	378	1	-4.7312
Id2	6	0.84645	0.92438	1	18271	2	-5.2916	0.0085004	0.01661	0.903485	379	2	-5.2916
Pccb	6	0.10019	0.28152	0.883465	6570	4	-4.1896	0.0085671	0.016732	0.903485	380	2	-4.1896
LOC100758625	6	0.11105	0.30405	0.895725	7006	4	-4.5768	0.0085677	0.016732	0.903485	381	1	-4.5768
S100a1	6	0.029416	0.10744	0.686615	3225	4	-5.1767	0.0086229	0.016842	0.903485	382	2	-5.1767
Ttc6	5	0.18754	0.41129	0.980007	8916	3	-6.121	0.0086338	0.016517	0.903485	383	2	-6.121
Strn	6	0.91013	0.95275	1	19084	1	0.033052	0.0086565	0.016899	0.903485	384	2	0.033052
Focad	5	0.97388	0.97393	1	20114	0	-4.8353	0.0086614	0.01656	0.903485	385	2	-4.8353
Ranbp10	6	0.87155	0.93777	1	18604	2	-5.6176	0.0087162	0.017007	0.903485	386	1	-5.6176
Poli	6	0.8514	0.92698	1	18339	2	-3.3006	0.0087519	0.017056	0.903485	387	2	-3.3006
Iqck	6	0.2632	0.51843	1	10533	3	-3.3665	0.0087657	0.017084	0.903485	388	1	-3.3665
Nupr1	6	0.5468	0.7656	1	14913	2	-4.0324	0.0087688	0.017089	0.903485	389	2	-4.0324
CTRLX12752	1	0.99115	0.99113	1	20829	0	1.3136	0.0088519	0.0088098	0.903485	390	1	1.3136
Nxpe3	6	0.28556	0.54656	1	11022	4	-5.9173	0.0088646	0.017266	0.903485	391	1	-5.9173
Fam159b	6	0.46429	0.70568	1	13852	2	-6.1154	0.0088647	0.017266	0.903485	392	2	-6.1154
Zdhhc13	6	0.49986	0.73161	1	14334	2	-5.4507	0.0089141	0.017367	0.903485	393	1	-5.4507
CTRLX16386	1	0.99106	0.99103	1	20822	0	1.354	0.0089433	0.0089024	0.903485	394	1	1.354
Ints10	5	0.94321	0.94907	1	19470	1	-3.0024	0.0089439	0.017054	0.903485	395	2	-3.0024
Bcap31	6	0.52212	0.74785	1	14609	3	-5.8101	0.0089636	0.017462	0.903485	396	1	-5.8101
Rexo1	6	0.18452	0.41304	0.981061	8842	4	-6.0362	0.0089783	0.017488	0.903485	397	2	-6.0362
Stil	6	0.31215	0.57935	1	11608	3	-4.8242	0.0090131	0.017551	0.903485	398	1	-4.8242
Bcan	6	0.23922	0.48726	1	10086	3	-3.19	0.0090239	0.017564	0.903485	399	2	-3.19
Ly6g5b	5	0.95247	0.95523	1	19632	1	-4.4051	0.0090433	0.017215	0.903485	400	1	-4.4051
Tex261	6	0.77665	0.89153	1	17453	2	-5.4722	0.0090625	0.01764	0.903485	401	1	-5.4722
B4galt5	6	0.45568	0.69946	1	13746	3	-4.9015	0.0090753	0.017672	0.903485	402	2	-4.9015
Xkr9	5	0.47411	0.69976	1	13976	2	-1.6169	0.0090938	0.017297	0.903485	403	2	-1.6169
Sesn3	6	0.18369	0.41184	0.98054	8819	3	-5.3189	0.009112	0.017734	0.903485	404	2	-5.3189
LOC100752306	6	0.64373	0.83455	1	16194	2	-2.5676	0.0091555	0.017806	0.903485	405	2	-2.5676
LOC100754186	6	0.9798	0.98042	1	20289	1	-4.7414	0.0091615	0.017815	0.903485	406	1	-4.7414
LOC100763798	6	0.036436	0.12682	0.721853	3610	5	-5.892	0.0092109	0.017891	0.903485	407	1	-5.892
LOC103158534	6	0.74284	0.87697	1	17111	2	-4.9343	0.0092131	0.017894	0.903485	408	2	-4.9343
Slc35f6	6	0.39162	0.65248	1	12858	3	-4.2132	0.0092246	0.017914	0.903485	409	2	-4.2132
Gp2	6	0.96748	0.97226	1	19939	1	-0.84071	0.0092997	0.018051	0.903485	410	2	-0.84071
Celf6	6	0.046878	0.15458	0.762846	4161	4	-6.3042	0.0093099	0.018065	0.903485	411	1	-6.3042
Golph3	4	0.040364	0.1198	0.708556	3830	2	-2.6769	0.0093275	0.017629	0.903485	412	2	-2.6769
Tmem239	6	0.84728	0.92482	1	18283	2	-5.6659	0.0093593	0.018158	0.903485	413	1	-5.6659
Lrrc19	4	0.9884	0.98844	1	20672	0	-3.7836	0.0093877	0.017743	0.903485	414	1	-3.7836
Capn6	5	0.61685	0.78436	1	15859	2	-3.736	0.0094114	0.017873	0.903485	415	2	-3.736
Atxn7l3b	5	0.35554	0.5863	1	12385	2	-5.5593	0.0094556	0.017958	0.903485	416	1	-5.5593
Vegfc	6	0.10357	0.28881	0.887123	6716	3	-5.2032	0.0094582	0.018333	0.903485	417	1	-5.2032
Camta1	6	0.55845	0.77391	1	15070	2	-1.5223	0.0094974	0.018404	0.903485	418	2	-1.5223
Calhm1	6	0.28666	0.54792	1	11048	3	-5.4912	0.0095077	0.01842	0.903485	419	1	-5.4912
Akap8l	6	0.53201	0.75502	1	14723	1	-3.2301	0.0095266	0.018451	0.903485	420	2	-3.2301
Wwc3	6	0.43248	0.68241	1	13401	2	-3.2185	0.0095325	0.018461	0.903485	421	2	-3.2185
Lrrn4	6	0.077438	0.22978	0.844227	5615	4	-4.8536	0.0095442	0.018479	0.903485	422	2	-4.8536
LOC100759693	6	0.037014	0.12839	0.722522	3645	4	-5.7062	0.0095571	0.018497	0.903485	423	1	-5.7062
LOC100764637	6	0.030534	0.11057	0.692527	3282	2	-5.1589	0.0096322	0.018647	0.903485	424	2	-5.1589
Trim35	6	0.25998	0.51432	1	10483	3	-2.9521	0.009644	0.01867	0.903485	425	2	-2.9521
LOC100774392	6	0.96065	0.96879	1	19796	1	-2.9618	0.0097055	0.018772	0.903485	426	1	-2.9618
Cyld	5	0.9621	0.96282	1	19825	1	-5.1526	0.0097147	0.01845	0.903485	427	2	-5.1526
Kif19	6	0.045587	0.15123	0.759489	4092	3	-5.8795	0.0097325	0.018823	0.903485	428	2	-5.8795
LOC100752743	6	0.20515	0.44167	0.995862	9337	4	-5.4215	0.0097549	0.018865	0.903485	429	1	-5.4215
Tusc5	6	0.27378	0.5318	1	10765	3	-5.0996	0.0098044	0.018957	0.903485	430	2	-5.0996
CTRLX06713	1	0.99019	0.99018	1	20773	0	1.6845	0.0098073	0.0097539	0.903485	431	1	1.6845
Fam193b	6	0.25776	0.51141	1	10439	4	-5.6068	0.0098272	0.018999	0.903485	432	2	-5.6068
Nova1	6	0.096542	0.27344	0.876961	6437	5	-6.467	0.0098538	0.019054	0.903485	433	1	-6.467
Pdgfc	5	0.56835	0.75848	1	15200	2	-5.2116	0.0098678	0.018706	0.903485	434	1	-5.2116
LOC100761874	4	0.99954	0.99952	1	21655	0	-2.3476	0.0098826	0.018648	0.903485	435	1	-2.3476
Il17rb	5	0.31138	0.54203	1	11587	3	-6.7404	0.0099502	0.018854	0.903485	436	1	-6.7404
Bmpr2	6	0.79534	0.8998	1	17663	2	-5.4923	0.0099527	0.019213	0.903485	437	1	-5.4923
Cdc42bpb	6	0.26003	0.5144	1	10486	2	-5.6205	0.0099881	0.019277	0.903485	438	2	-5.6205
Thoc6	6	0.044602	0.14865	0.757333	4033	3	-5.4007	0.010036	0.019359	0.903485	439	2	-5.4007
LOC100755866	6	0.013186	0.057609	0.569146	2082	5	-6.5238	0.010052	0.019385	0.903485	440	1	-6.5238
Pcgf6	5	0.99091	0.99094	1	20813	0	-3.6026	0.010072	0.01908	0.903485	441	2	-3.6026
Tctex1d1	6	0.99989	0.99989	1	21795	0	-0.48072	0.010101	0.019479	0.903485	442	2	-0.48072
Letm2	5	0.21634	0.44242	0.995862	9592	3	-5.3207	0.010126	0.01917	0.903485	443	2	-5.3207
Klf7	6	0.12624	0.3275	0.919961	7381	4	-5.335	0.01015	0.019559	0.903485	444	2	-5.335
Pdk2	5	0.82776	0.90536	1	18051	1	-3.8033	0.010185	0.019293	0.903485	445	2	-3.8033
LOC100750926	6	0.52071	0.74683	1	14597	3	-5.9253	0.010211	0.019661	0.903485	446	2	-5.9253
Pi16	6	0.013873	0.060282	0.577584	2158	4	-5.8377	0.010249	0.019731	0.903485	447	1	-5.8377
LOC100768921	5	0.95818	0.95956	1	19748	1	-5.0807	0.01028	0.019466	0.903485	448	1	-5.0807
LOC100760668	6	0.092441	0.2642	0.868836	6268	3	-5.2137	0.010283	0.01979	0.903485	449	2	-5.2137
Exoc6b	6	0.64399	0.83476	1	16197	1	-4.6697	0.010299	0.019815	0.903485	450	1	-4.6697
Arsa	6	0.45093	0.69599	1	13671	3	-4.96	0.010307	0.019833	0.903485	451	2	-4.96
Srgap3	6	0.27228	0.52992	1	10733	3	-3.1107	0.010344	0.019902	0.903485	452	2	-3.1107
LOC100768763	6	0.17582	0.40079	0.973034	8629	3	-6.0679	0.010348	0.019914	0.903485	453	1	-6.0679
Cacna2d1	6	0.42856	0.67958	1	13356	3	-5.5323	0.01035	0.019916	0.903485	454	2	-5.5323
Hoxc11	6	0.26892	0.52574	1	10651	3	-5.4711	0.010356	0.019924	0.903485	455	2	-5.4711
Myo1b	6	0.22709	0.47129	1	9803	3	-5.0462	0.010397	0.02	0.903485	456	1	-5.0462
Ttc33	6	0.78547	0.89539	1	17540	1	-5.1917	0.010447	0.020082	0.903485	457	1	-5.1917
Rho	6	0.34701	0.61915	1	12271	2	-5.1684	0.010454	0.020093	0.903485	458	2	-5.1684
Kcnn1	6	0.39911	0.65794	1	12962	3	-6.244	0.01046	0.020106	0.903485	459	2	-6.244
Cabs1	6	0.97547	0.9772	1	20165	1	-3.5668	0.010472	0.020123	0.903485	460	2	-3.5668
Sertad3	6	0.029708	0.10824	0.688551	3240	3	-3.0727	0.01049	0.020154	0.903485	461	2	-3.0727
Nfib	6	0.39337	0.65374	1	12880	2	-2.5066	0.010509	0.020187	0.903485	462	2	-2.5066
Znf827	5	0.49366	0.71772	1	14242	2	-5.4434	0.010527	0.019928	0.903485	463	1	-5.4434
LOC107977316	5	0.10828	0.27181	0.874925	6904	3	-5.3814	0.010568	0.019998	0.903485	464	1	-5.3814
Drc7	6	0.45708	0.70045	1	13767	3	-5.6782	0.010594	0.020345	0.903485	465	2	-5.6782
Fgd1	6	0.0086495	0.039329	0.518111	1573	5	-5.4605	0.010595	0.020345	0.903485	466	1	-5.4605
Pcnx4	6	0.45142	0.69635	1	13678	2	-5.7956	0.010625	0.020391	0.903485	467	2	-5.7956
Ifi44	6	0.75027	0.88008	1	17181	1	-3.1211	0.010631	0.0204	0.903485	468	2	-3.1211
Sbsn	6	0.27228	0.52992	1	10732	4	-3.8953	0.010645	0.020425	0.903485	469	2	-3.8953
Prkcd	5	0.3266	0.55742	1	11898	2	-6.5825	0.010651	0.020133	0.903485	470	1	-6.5825
LOC100768274	5	0.57472	0.76174	1	15289	1	-4.1977	0.010651	0.020134	0.903485	471	2	-4.1977
CTRLX01646	1	0.98934	0.98936	1	20733	0	1.6117	0.010663	0.010598	0.903485	472	1	1.6117
Chat	6	0.59317	0.79887	1	15549	1	-5.4905	0.010675	0.020469	0.903485	473	2	-5.4905
Hectd4	6	0.2281	0.47264	1	9828	3	-3.5838	0.010699	0.020517	0.903485	474	2	-3.5838
CTRLX00303	1	0.98926	0.98929	1	20724	0	1.2897	0.010738	0.010658	0.903485	475	1	1.2897
Nudt9	6	0.18461	0.41317	0.981061	8844	3	-5.4539	0.010743	0.020588	0.903485	476	1	-5.4539
CTRLX05466	1	0.98925	0.98928	1	20722	0	1.2878	0.010746	0.010665	0.903485	477	1	1.2878
Znf644	6	0.80749	0.90534	1	17819	1	-2.2688	0.01078	0.02065	0.903485	478	2	-2.2688
Slc7a7	6	0.045303	0.15049	0.758596	4078	4	-6.1917	0.010793	0.020672	0.903485	479	1	-6.1917
Usp16	6	0.97672	0.97806	1	20202	1	-4.7299	0.010842	0.020746	0.903485	480	2	-4.7299
Ccdc155	6	0.85393	0.92832	1	18365	2	-4.7044	0.010848	0.020754	0.903485	481	2	-4.7044
LOC100751526	5	0.21793	0.44412	0.99629	9623	2	-1.6268	0.010856	0.020494	0.903485	482	1	-1.6268
LOC100753077	6	0.40592	0.66294	1	13059	3	-4.7296	0.010879	0.020811	0.903485	483	2	-4.7296
Magi2	6	0.19728	0.4308	0.990562	9156	2	-5.8491	0.010892	0.020829	0.903485	484	1	-5.8491
Daam1	6	0.54013	0.76078	1	14831	3	-5.2065	0.010904	0.020848	0.903485	485	2	-5.2065
Phpt1	6	0.18532	0.41417	0.981293	8865	4	-6.0177	0.010929	0.020892	0.903485	486	2	-6.0177
Clec5a	6	0.14739	0.35935	0.944983	7919	3	-5.9009	0.010947	0.020922	0.903485	487	2	-5.9009
LOC100772063	6	0.31296	0.5803	1	11626	4	-5.9272	0.010985	0.020993	0.903485	488	2	-5.9272
Thop1	6	0.0014648	0.00743	0.320428	480	3	-4.9953	0.01099	0.021004	0.903485	489	1	-4.9953
Inhbe	6	0.0076697	0.035255	0.501709	1473	4	-6.0714	0.010991	0.021006	0.903485	490	2	-6.0714
Tbl1xr1	6	0.18245	0.41013	0.97954	8793	4	-4.5334	0.01104	0.02109	0.904177	491	1	-4.5334
Fras1	6	0.83701	0.91966	1	18158	2	-5.5764	0.011138	0.021264	0.909876	492	1	-5.5764
Hipk4	6	0.17145	0.39458	0.969904	8516	4	-5.3036	0.011236	0.02144	0.910862	493	2	-5.3036
LOC100760226	6	0.20791	0.44542	0.996952	9409	3	-5.6563	0.011237	0.021443	0.910862	494	1	-5.6563
Lime1	6	0.52506	0.74998	1	14635	2	-1.9154	0.011242	0.021454	0.910862	495	2	-1.9154
Cemip	6	0.27087	0.52817	1	10702	4	-5.7898	0.011249	0.021468	0.910862	496	2	-5.7898
Znf777	6	0.12736	0.32918	0.921534	7406	4	-5.8365	0.011268	0.021502	0.910862	497	2	-5.8365
LOC100773074	6	0.0080232	0.036749	0.50573	1518	4	-5.6113	0.011287	0.021537	0.910862	498	1	-5.6113
Pagr1	6	0.1065	0.29524	0.891642	6834	2	-0.93554	0.011325	0.0216	0.911759	499	2	-0.93554
Mansc4	6	0.13604	0.34238	0.93271	7625	4	-6.3288	0.011385	0.021697	0.914099	500	1	-6.3288
Eng	6	0.72863	0.87116	1	16990	2	-5.7686	0.011435	0.021783	0.915975	501	1	-5.7686
Grhl2	6	0.88122	0.94317	1	18755	2	-5.7904	0.011484	0.021863	0.917558	502	1	-5.7904
Impg2	6	0.55345	0.77035	1	15007	3	-5.2169	0.011533	0.021939	0.918039	503	2	-5.2169
Aqp11	6	0.33365	0.60496	1	12039	2	-5.9804	0.011583	0.022035	0.918039	504	1	-5.9804
Tff1	6	0.040576	0.13801	0.738131	3847	4	-5.6278	0.011618	0.022085	0.918039	505	2	-5.6278
Col6a2	6	0.81887	0.91071	1	17944	2	-4.7014	0.011663	0.022162	0.918039	506	2	-4.7014
Il21	6	0.00097161	0.0050375	0.285658	373	3	-5.6008	0.011682	0.02218	0.918039	507	2	-5.6008
Usp24	6	0.9792	0.97992	1	20268	1	-4.4248	0.011695	0.022204	0.918039	508	2	-4.4248
LOC100756712	6	0.28925	0.55119	1	11107	2	-4.4461	0.011708	0.022224	0.918039	509	2	-4.4461
LOC100770672	6	0.32346	0.59292	1	11835	1	-4.539	0.011731	0.022261	0.918039	510	1	-4.539
LOC100772045	6	0.57234	0.78385	1	15252	3	-4.3924	0.01174	0.022281	0.918039	511	2	-4.3924
Nars	4	0.99901	0.99901	1	21512	0	-3.5945	0.011761	0.020897	0.903485	512	1	-3.5945
LOC107980174	6	0.742	0.87662	1	17099	1	-5.2608	0.01178	0.022348	0.918039	513	1	-5.2608
Spert	6	0.34751	0.61953	1	12274	3	-5.3518	0.011798	0.022377	0.918039	514	2	-5.3518
Anapc1	6	0.97407	0.97623	1	20119	1	-4.9841	0.011879	0.02252	0.919918	515	1	-4.9841
Akt3	5	0.12361	0.30036	0.893885	7301	3	-3.5519	0.011885	0.022341	0.918039	516	1	-3.5519
Crabp1	6	0.048931	0.15989	0.770317	4257	3	-2.5158	0.011915	0.022579	0.919918	517	2	-2.5158
Rab10	6	0.13407	0.33938	0.929838	7575	3	-2.8216	0.011921	0.022591	0.919918	518	2	-2.8216
LOC100757490	5	0.0043032	0.018022	0.408179	1015	3	-5.1643	0.011973	0.0225	0.919918	519	2	-5.1643
2007-03-01	6	0.98647	0.98654	1	20569	0	-4.9349	0.011978	0.022696	0.921461	520	1	-4.9349
Anp32e	6	0.71035	0.86394	1	16823	1	-5.0902	0.011986	0.022713	0.921461	521	2	-5.0902
Timp3	6	0.3434	0.6163	1	12230	3	-5.5295	0.012019	0.022768	0.922009	522	2	-5.5295
Lamp5	6	0.14191	0.35125	0.940092	7770	2	-4.0482	0.012116	0.022949	0.9266	523	2	-4.0482
CTRLX10162	1	0.98787	0.98791	1	20649	0	1.1923	0.012125	0.012036	0.903485	524	1	1.1923
Tchh	6	0.85217	0.92737	1	18348	2	-5.4786	0.012126	0.022966	0.9266	525	1	-5.4786
LOC100756229	6	0.82896	0.91566	1	18063	2	-4.3574	0.012208	0.023104	0.92779	526	2	-4.3574
Snx9	6	0.46536	0.70646	1	13870	3	-3.1794	0.012241	0.023162	0.92779	527	2	-3.1794
Rasef	6	0.76023	0.88434	1	17280	2	-5.7971	0.012274	0.023213	0.92779	528	1	-5.7971
Raver2	6	0.0060232	0.028164	0.472586	1253	4	-5.5268	0.012287	0.023232	0.92779	529	2	-5.5268
Rph3a	6	0.044727	0.14896	0.757524	4042	4	-5.9031	0.012353	0.023362	0.92779	530	2	-5.9031
Mylk4	6	0.27179	0.52929	1	10722	1	-4.4969	0.012372	0.023401	0.92779	531	1	-4.4969
Itgae	6	0.037395	0.12943	0.723422	3669	4	-2.527	0.012399	0.023452	0.92779	532	2	-2.527
Tmx4	6	0.62915	0.8243	1	16008	2	-5.9644	0.012422	0.023492	0.92779	533	1	-5.9644
Tmc6	6	0.66611	0.84697	1	16444	2	-5.4135	0.012471	0.023579	0.92779	534	1	-5.4135
Ptpn13	6	0.5744	0.78532	1	15282	2	-2.7347	0.012485	0.023607	0.92779	535	2	-2.7347
Prop1	6	0.05528	0.1762	0.789323	4572	3	-3.6501	0.01252	0.023672	0.92779	536	2	-3.6501
Bcl2	6	0.72798	0.87091	1	16984	2	-5.1787	0.012531	0.023685	0.92779	537	2	-5.1787
Sbspon	6	0.090933	0.26081	0.86637	6204	4	-4.8412	0.012551	0.023724	0.92779	538	2	-4.8412
LOC100758350	6	0.76915	0.8882	1	17373	2	-5.2638	0.01257	0.023758	0.92779	539	1	-5.2638
Zc3h12c	5	0.89426	0.92578	1	18929	1	-5.2456	0.012626	0.023648	0.92779	540	1	-5.2456
Rph3al	6	0.58246	0.79113	1	15399	3	-5.6743	0.012631	0.023863	0.930226	541	2	-5.6743
Pla2g2c	6	0.76594	0.88677	1	17338	1	-5.072	0.012711	0.023999	0.931877	542	2	-5.072
Plxnc1	6	0.33737	0.60935	1	12123	2	-4.8202	0.012718	0.02401	0.931877	543	1	-4.8202
Sun1	6	0.60703	0.80875	1	15721	2	-3.5426	0.012745	0.02407	0.931877	544	2	-3.5426
Hn1	6	0.88087	0.94297	1	18746	2	-6.0466	0.012816	0.024194	0.931877	545	1	-6.0466
Sema4a	6	0.081965	0.24036	0.853164	5806	2	-4.5541	0.012832	0.024223	0.931877	546	2	-4.5541
Mogat2	6	0.19087	0.42191	0.984796	8999	3	-6.0399	0.012845	0.024249	0.931877	547	2	-6.0399
Znf784	6	0.83925	0.92077	1	18190	2	-5.9627	0.012852	0.024263	0.931877	548	2	-5.9627
Sv2c	6	0.07562	0.22555	0.840062	5530	4	-5.7224	0.012866	0.024286	0.931877	549	1	-5.7224
Armc9	6	0.39855	0.65753	1	12951	3	-5.3328	0.012906	0.024356	0.931877	550	2	-5.3328
Panx3	6	0.59704	0.80165	1	15603	2	-3.0938	0.012912	0.024367	0.931877	551	2	-3.0938
Prom1	6	0.42668	0.67816	1	13330	3	-3.5196	0.012915	0.024373	0.931877	552	1	-3.5196
Cdca4	6	0.23378	0.48012	1	9964	2	-0.50947	0.01298	0.024488	0.933125	553	2	-0.50947
LOC100770068	6	0.95485	0.96627	1	19680	1	-5.0728	0.013	0.02452	0.933125	554	2	-5.0728
Naxe	6	0.31747	0.58576	1	11714	3	-5.3848	0.013007	0.024534	0.933125	555	2	-5.3848
Nfatc3	6	0.1241	0.32415	0.917456	7315	2	-4.6053	0.013063	0.024634	0.935318	556	1	-4.6053
Gfi1	6	0.57749	0.78753	1	15330	3	-5.7967	0.013112	0.024725	0.935494	557	1	-5.7967
Tmem63c	6	0.99424	0.99427	1	21020	0	-4.0548	0.013156	0.024798	0.935494	558	2	-4.0548
Drg1	6	0.7791	0.89259	1	17476	2	-2.5029	0.013161	0.024808	0.935494	559	1	-2.5029
LOC103164223	6	0.057057	0.18062	0.793257	4666	4	-5.7565	0.01326	0.024967	0.935494	560	1	-5.7565
Kpna4	3	0.90552	0.90563	1	19044	0	-5.8514	0.013262	0.017479	0.903485	561	1	-5.8514
Mapk13	6	0.58263	0.79126	1	15401	2	-4.6301	0.013278	0.025	0.935494	562	2	-4.6301
LOC100772759	6	0.81093	0.907	1	17865	1	-5.6662	0.013305	0.025046	0.935494	563	2	-5.6662
Slc25a38	6	0.1927	0.42446	0.986527	9043	3	-5.1653	0.013319	0.025069	0.935494	564	2	-5.1653
LOC100766665	6	0.052516	0.16916	0.781503	4441	3	-3.6007	0.013333	0.025094	0.935494	565	2	-3.6007
Clec4f	6	0.18968	0.42028	0.984004	8969	3	-6.269	0.013359	0.025137	0.935494	566	1	-6.269
Adgre5	6	0.48904	0.7237	1	14172	3	-5.8606	0.013374	0.025157	0.935494	567	2	-5.8606
Zfp1	5	0.627	0.78986	1	15974	2	-4.8341	0.013407	0.024998	0.935494	568	1	-4.8341
Adgrv1	6	0.92135	0.95554	1	19192	1	-5.5954	0.013408	0.025222	0.935494	569	1	-5.5954
Lrtm1	6	0.6589	0.84427	1	16377	1	-3.4332	0.013457	0.025305	0.935494	570	1	-3.4332
Ldah	5	0.035802	0.12082	0.710953	3575	3	-5.1198	0.013466	0.025105	0.935494	571	2	-5.1198
Pdc	6	0.93859	0.96044	1	19399	1	-5.3044	0.01347	0.025324	0.935494	572	2	-5.3044
Vsx2	6	0.29952	0.56388	1	11330	4	-5.2082	0.01349	0.025367	0.935494	573	2	-5.2082
Wnt9a	6	0.15286	0.36746	0.951687	8056	4	-5.2449	0.013506	0.025392	0.935494	574	1	-5.2449
LOC100752553	6	0.11027	0.30284	0.894749	6983	4	-5.9322	0.013545	0.025464	0.935494	575	2	-5.9322
Rnft2	6	0.043915	0.14686	0.75352	4007	4	-4.3721	0.013556	0.025486	0.935494	576	1	-4.3721
Ppp1r9b	6	0.18486	0.41354	0.981236	8853	2	-4.5844	0.013559	0.025493	0.935494	577	2	-4.5844
Dhcr7	6	0.59832	0.80255	1	15624	3	-5.4093	0.013605	0.025577	0.935824	578	1	-5.4093
Ppef1	6	0.58087	0.78999	1	15376	3	-5.9248	0.013614	0.025587	0.935824	579	2	-5.9248
LOC100764785	6	0.10559	0.29327	0.889637	6800	2	-5.6209	0.013654	0.025666	0.935824	580	1	-5.6209
LOC100759552	6	0.37575	0.64058	1	12667	3	-5.7233	0.013704	0.025758	0.935824	581	1	-5.7233
Tshz2	6	0.20314	0.43896	0.994019	9297	4	-5.7044	0.013753	0.025834	0.937045	582	1	-5.7044
Catsper4	6	0.96929	0.97324	1	19982	1	-6.0165	0.013802	0.025918	0.937411	583	2	-6.0165
LOC100754758	5	0.6371	0.79544	1	16113	2	-5.4643	0.013806	0.025722	0.935824	584	2	-5.4643
Styk1	6	0.025291	0.095656	0.662548	2977	3	-3.1769	0.013828	0.025968	0.937411	585	2	-3.1769
LOC100766643	6	0.12181	0.32066	0.914	7260	3	-5.8372	0.013851	0.026002	0.937411	586	1	-5.8372
Pgm2l1	6	0.84088	0.92157	1	18213	2	-3.1601	0.013891	0.026073	0.937411	587	2	-3.1601
Ivd	6	0.4948	0.72788	1	14258	1	-1.5333	0.013912	0.02611	0.937411	588	2	-1.5333
Klf10	6	0.65571	0.84293	1	16351	3	-4.9731	0.01395	0.026177	0.937411	589	1	-4.9731
CTRLX12336	1	0.98603	0.98603	1	20549	0	1.1982	0.013969	0.013877	0.903485	590	1	1.1982
LOC100772869	6	0.55958	0.77469	1	15086	2	-3.0289	0.013988	0.026245	0.937411	591	2	-3.0289
Sh3bgrl2	6	0.24107	0.48969	1	10123	4	-4.6513	0.013995	0.026252	0.937411	592	2	-4.6513
Tespa1	6	0.29579	0.55929	1	11252	4	-6.2941	0.014098	0.026423	0.937411	593	1	-6.2941
LOC100774562	6	0.21944	0.46094	1	9652	4	-5.6459	0.014196	0.026598	0.937411	594	1	-5.6459
Rnf157	6	0.094885	0.26972	0.874407	6358	4	-5.9097	0.01422	0.026635	0.937411	595	2	-5.9097
Pnkd	6	0.66673	0.8472	1	16450	2	-2.547	0.014269	0.026727	0.937411	596	2	-2.547
Prkd1	5	0.78269	0.882	1	17511	2	-4.7323	0.014269	0.026514	0.937411	597	1	-4.7323
Cadps2	6	0.057485	0.18167	0.794534	4686	4	-5.6479	0.014295	0.026771	0.937411	598	1	-5.6479
LOC100750669	5	0.31338	0.54409	1	11632	3	-5.0503	0.014352	0.026668	0.937411	599	1	-5.0503
Pdp1	6	0.63206	0.82633	1	16049	2	-3.8606	0.014368	0.026906	0.937411	600	2	-3.8606
Myo15a	6	0.28861	0.55037	1	11096	3	-3.8433	0.014382	0.026929	0.937411	601	2	-3.8433
Chcr2	6	0.13776	0.34505	0.935054	7670	4	-5.9912	0.014393	0.026949	0.937411	602	1	-5.9912
Ggt7	6	0.25421	0.50684	1	10369	3	-4.5431	0.014424	0.027002	0.937411	603	2	-4.5431
Swsap1	6	0.077686	0.23033	0.844775	5625	3	-5.2991	0.014481	0.027096	0.937411	604	2	-5.2991
LOC100765065	6	0.9904	0.99043	1	20781	0	-4.0408	0.014488	0.027107	0.937411	605	2	-4.0408
Rp2	6	0.70101	0.86029	1	16739	2	-5.7459	0.014492	0.027114	0.937411	606	1	-5.7459
Pygo2	6	0.86467	0.93402	1	18510	2	-5.279	0.01459	0.02726	0.937411	607	1	-5.279
Cdkn1a	6	0.59009	0.79667	1	15506	3	-6.3449	0.014666	0.027397	0.937411	608	2	-6.3449
Fgf4	6	0.23331	0.47949	1	9954	4	-6.3115	0.014689	0.027435	0.937411	609	1	-6.3115
LOC103160806	4	0.3488	0.55984	1	12286	2	-6.3178	0.01469	0.023507	0.92779	610	1	-6.3178
Socs6	6	0.31492	0.58268	1	11672	2	-3.1276	0.014723	0.027487	0.937411	611	2	-3.1276
P4ha3	6	0.076381	0.22732	0.843066	5557	2	-3.292	0.01473	0.0275	0.937411	612	2	-3.292
LOC100750484	6	0.00073047	0.0038037	0.256893	316	5	-6.1752	0.014738	0.027512	0.937411	613	1	-6.1752
CTRLX16739	1	0.98523	0.98524	1	20502	0	1.1507	0.014767	0.014658	0.903485	614	1	1.1507
LOC103158824	6	0.72122	0.86823	1	16916	1	-5.2188	0.01483	0.02766	0.937411	615	2	-5.2188
Eml1	5	0.84099	0.9088	1	18215	1	-6.3109	0.014833	0.027555	0.937411	616	2	-6.3109
Bicdl1	6	0.85118	0.92687	1	18337	2	-4.8566	0.014866	0.027723	0.937411	617	2	-4.8566
C1qtnf3	6	0.00052327	0.0027254	0.227968	258	3	-3.908	0.014886	0.027755	0.937411	618	1	-3.908
Cln6	6	0.80149	0.90254	1	17738	2	-4.5368	0.014895	0.027774	0.937411	619	2	-4.5368
Reln	6	0.24472	0.49443	1	10182	4	-6.034	0.014909	0.027797	0.937411	620	2	-6.034
Cbl	6	0.111	0.30398	0.895725	7004	3	-6.1483	0.01493	0.027832	0.937411	621	2	-6.1483
Mthfd1l	6	0.016283	0.068996	0.601496	2378	5	-5.7012	0.014935	0.027839	0.937411	622	1	-5.7012
Rpusd3	6	0.11816	0.31504	0.907636	7179	3	-1.4939	0.015002	0.027953	0.937411	623	2	-1.4939
LOC100758622	6	0.36333	0.63134	1	12502	2	-1.6534	0.015024	0.027992	0.937411	624	2	-1.6534
Npw	6	0.0073843	0.034043	0.497271	1440	4	-6.1383	0.015033	0.028005	0.937411	625	1	-6.1383
Mcoln2	6	0.66744	0.84748	1	16459	2	-2.7652	0.015038	0.028013	0.937411	626	2	-2.7652
Sptlc3	5	0.46538	0.69173	1	13871	3	-5.706	0.015052	0.027949	0.937411	627	2	-5.706
Nr1i2	6	0.034469	0.12144	0.711771	3511	4	-5.4862	0.015169	0.028231	0.937411	628	2	-5.4862
LOC100772575	6	0.11684	0.31299	0.904982	7149	4	-5.7028	0.015181	0.028246	0.937411	629	1	-5.7028
Drd4	6	0.30713	0.57325	1	11481	3	-5.5927	0.015197	0.02827	0.937411	630	2	-5.5927
Mgp	6	0.10374	0.28921	0.887123	6724	4	-6.1071	0.015226	0.028323	0.937411	631	2	-6.1071
Adam22	6	0.91467	0.95384	1	19126	1	-4.7406	0.01523	0.028329	0.937411	632	2	-4.7406
Trpm8	6	0.019553	0.078864	0.626127	2600	3	-4.7082	0.015234	0.028336	0.937411	633	2	-4.7082
Slc25a20	6	0.092143	0.26353	0.867723	6259	2	-0.67347	0.015255	0.028367	0.937411	634	2	-0.67347
Klhdc3	6	0.97594	0.97752	1	20182	1	-5.0465	0.015277	0.028408	0.937411	635	2	-5.0465
Rif1	6	0.62312	0.82008	1	15938	2	-5.0279	0.015279	0.028412	0.937411	636	1	-5.0279
Sqrdl	6	0.37711	0.64161	1	12681	3	-5.524	0.015329	0.028485	0.937881	637	1	-5.524
Clk3	6	0.56972	0.78199	1	15214	3	-5.596	0.015343	0.028511	0.937881	638	2	-5.596
LOC100765627	6	0.1843	0.41271	0.980825	8840	4	-5.2299	0.015372	0.028567	0.938315	639	2	-5.2299
Prdx4	6	0.78846	0.89673	1	17577	2	-2.2469	0.015416	0.028647	0.938362	640	2	-2.2469
Tmem72	6	0.61249	0.81261	1	15802	2	-5.2337	0.015476	0.028755	0.938362	641	1	-5.2337
Slc30a6	6	0.097268	0.27505	0.878767	6460	3	-5.788	0.015525	0.028845	0.938362	642	1	-5.788
LOC100760452	6	0.95181	0.96509	1	19620	1	-5.1815	0.015547	0.028892	0.938362	643	2	-5.1815
Arhgef37	6	0.019259	0.077975	0.623894	2581	3	-5.0821	0.015562	0.028915	0.938362	644	2	-5.0821
LOC100771018	6	0.2811	0.54094	1	10916	4	-5.0691	0.015575	0.028938	0.938362	645	1	-5.0691
Farp2	6	0.74239	0.87677	1	17103	2	-4.417	0.015672	0.029106	0.938362	646	2	-4.417
LOC100769651	6	0.8302	0.91624	1	18081	2	-0.84427	0.015694	0.029136	0.938362	647	2	-0.84427
Pla2g5	5	0.93289	0.94319	1	19318	1	-5.5626	0.015717	0.029167	0.938362	648	2	-5.5626
Apobec3b	6	0.21361	0.45322	1	9540	2	-6.1811	0.015722	0.029188	0.938362	649	1	-6.1811
Slc35c2	6	0.18037	0.40717	0.977628	8751	4	-5.8292	0.015771	0.029282	0.938362	650	1	-5.8292
CTRLX05162	1	0.9842	0.98422	1	20455	0	1.1448	0.015797	0.015701	0.903485	651	1	1.1448
Tigar	6	0.25832	0.51215	1	10449	3	-4.59	0.015841	0.029399	0.938362	652	2	-4.59
Hpse2	6	0.63721	0.82997	1	16115	2	-4.7025	0.015856	0.029425	0.938362	653	2	-4.7025
Zranb3	6	0.6984	0.85927	1	16721	1	-4.7845	0.01587	0.029449	0.938362	654	1	-4.7845
Dmxl2	5	0.40526	0.6351	1	13050	3	-5.4441	0.01588	0.029452	0.938362	655	2	-5.4441
LOC100773165	5	0.49158	0.71582	1	14213	3	-3.3446	0.015911	0.029508	0.938362	656	1	-3.3446
Rpl4	3	0.98552	0.98567	1	20517	0	-5.0477	0.015928	0.019948	0.903485	657	1	-5.0477
Ralbp1	6	0.22903	0.4739	1	9852	3	-5.785	0.015959	0.029606	0.938362	658	2	-5.785
Nccrp1	6	0.95727	0.9673	1	19731	1	-2.4224	0.015967	0.029618	0.938362	659	2	-2.4224
Mau2	6	0.239	0.48698	1	10082	2	-5.4205	0.015968	0.029621	0.938362	660	1	-5.4205
Trim29	6	0.14818	0.36053	0.945783	7942	3	-5.7463	0.016017	0.029702	0.938362	661	1	-5.7463
CTRLX13456	1	0.98397	0.984	1	20450	0	0.95266	0.01603	0.015928	0.903485	662	1	0.95266
Dcbld2	6	0.41869	0.67234	1	13237	3	-5.9316	0.016041	0.029743	0.938362	663	2	-5.9316
Trib2	6	0.00040712	0.002151	0.21918	214	3	-2.1285	0.016048	0.029756	0.938362	664	2	-2.1285
LOC100772655	6	0.49856	0.73068	1	14307	3	-4.4822	0.016056	0.029765	0.938362	665	2	-4.4822
Usp3	5	0.98898	0.98902	1	20703	0	-4.4488	0.016076	0.029808	0.938362	666	2	-4.4488
Prr5l	6	0.36586	0.63325	1	12533	1	-4.2848	0.016115	0.029856	0.938362	667	2	-4.2848
Slc4a1	6	0.31115	0.57816	1	11582	4	-5.3892	0.01616	0.029941	0.938362	668	2	-5.3892
Dip2a	6	0.16395	0.3838	0.96248	8339	4	-5.8785	0.016214	0.030023	0.938362	669	1	-5.8785
Mmp16	6	0.23681	0.48413	1	10028	4	-6.3384	0.016263	0.030101	0.938362	670	1	-6.3384
LOC100767604	6	0.97732	0.97849	1	20216	1	-5.1215	0.016279	0.030134	0.938362	671	2	-5.1215
LOC100757974	6	0.46063	0.70304	1	13799	2	-5.7662	0.016302	0.030167	0.938362	672	2	-5.7662
Slc22a15	6	0.093806	0.26725	0.871696	6327	4	-4.8337	0.016312	0.030189	0.938362	673	1	-4.8337
Ttll3	6	0.78898	0.89697	1	17586	1	-4.3191	0.016324	0.030214	0.938362	674	2	-4.3191
Kiaa0907	6	0.97193	0.97485	1	20065	1	-3.8284	0.016332	0.030229	0.938362	675	2	-3.8284
LOC107976982	6	0.054002	0.1729	0.786955	4506	4	-6.2964	0.016362	0.030286	0.938362	676	1	-6.2964
LOC100768011	6	0.99406	0.99409	1	21007	0	-4.1579	0.016411	0.030371	0.938362	677	1	-4.1579
Tex26	6	0.30168	0.56654	1	11372	4	-5.5853	0.016437	0.030422	0.938362	678	2	-5.5853
CTRL00343	1	0.98355	0.98357	1	20437	0	1.0005	0.016453	0.016374	0.903485	679	1	1.0005
LOC100755298	6	0.010828	0.048265	0.545609	1830	4	-5.4682	0.01646	0.030452	0.938362	680	1	-5.4682
LOC100753900	6	0.99306	0.9931	1	20939	0	-5.1205	0.016509	0.030541	0.938362	681	1	-5.1205
Arfgef3	6	0.61587	0.81504	1	15846	3	-2.6083	0.016558	0.03062	0.938362	682	1	-2.6083
LOC100771436	6	0.046932	0.15472	0.762959	4166	2	-5.3893	0.016602	0.030694	0.938362	683	2	-5.3893
Reep2	6	0.18671	0.41614	0.982007	8896	2	-3.8897	0.016607	0.030705	0.938362	684	1	-3.8897
Adcy7	6	0.304	0.56941	1	11424	4	-5.3619	0.016656	0.030796	0.938362	685	1	-5.3619
Tmem25	6	0.1254	0.32619	0.918679	7355	4	-5.1378	0.01667	0.030813	0.938362	686	2	-5.1378
Neurod6	6	0.010241	0.045906	0.537817	1769	5	-5.833	0.016706	0.030871	0.938362	687	1	-5.833
Mief1	6	0.47563	0.71395	1	13998	2	-3.8969	0.01673	0.030913	0.938362	688	2	-3.8969
Ildr2	6	0.17569	0.40059	0.973034	8623	4	-5.6121	0.016738	0.030931	0.938362	689	2	-5.6121
Shisa3	6	0.015285	0.06574	0.591708	2290	4	-5.9866	0.016755	0.030955	0.938362	690	1	-5.9866
LOC100754546	5	0.30784	0.5384	1	11497	3	-6.1538	0.016773	0.031064	0.938362	691	2	-6.1538
Unc5d	6	0.84079	0.92152	1	18211	2	-5.8342	0.016804	0.031042	0.938362	692	1	-5.8342
Ccdc65	5	0.0002084	0.00099042	0.156966	144	3	-6.1127	0.016813	0.031128	0.938362	693	1	-6.1127
Ca3	6	0.23735	0.48485	1	10041	3	-2.7923	0.016837	0.031095	0.938362	694	2	-2.7923
Narf	6	0.99044	0.99046	1	20782	0	-2.1959	0.016852	0.031122	0.938362	695	2	-2.1959
LOC107977410	6	0.36237	0.63062	1	12485	2	-5.3341	0.016853	0.031125	0.938362	696	1	-5.3341
Slc1a7	6	0.097117	0.27474	0.878499	6452	4	-4.0523	0.016951	0.03128	0.938362	697	1	-4.0523
LOC100761514	5	0.71354	0.83931	1	16849	2	-5.4697	0.016977	0.031363	0.938362	698	1	-5.4697
Nfasc	6	0.1581	0.37521	0.956474	8191	3	-5.6193	0.017001	0.031379	0.938362	699	1	-5.6193
Ppfia4	6	0.029999	0.10906	0.689905	3251	4	-5.4948	0.01705	0.031461	0.938362	700	2	-5.4948
Hydin	6	0.097739	0.27606	0.879276	6480	5	-6.0776	0.01705	0.031462	0.938362	701	1	-6.0776
CTRLX18903	1	0.98294	0.98298	1	20410	0	1.0473	0.01706	0.017017	0.903485	702	1	1.0473
CTRLX06597	1	0.98292	0.98295	1	20406	0	0.80036	0.017085	0.017044	0.903485	703	1	0.80036
LOC100754037	5	0.39594	0.62612	1	12917	2	-4.6269	0.017141	0.031492	0.938362	704	1	-4.6269
Cdk5rap2	6	0.27713	0.536	1	10834	3	-5.528	0.017148	0.031637	0.938362	705	1	-5.528
LOC100765903	4	0.45343	0.63546	1	13709	1	-3.2265	0.017185	0.025755	0.935824	706	1	-3.2265
LOC100773747	6	0.99213	0.99215	1	20882	0	-5.7607	0.017246	0.031815	0.938362	707	1	-5.7607
Dclk1	6	0.011364	0.050412	0.554756	1873	4	-4.2746	0.017264	0.031841	0.938362	708	2	-4.2746
Smpdl3b	6	0.95073	0.96467	1	19606	1	-5.747	0.017294	0.031892	0.938362	709	2	-5.747
LOC103164102	6	0.706	0.86226	1	16783	2	-5.028	0.017295	0.031895	0.938362	710	1	-5.028
Sim2	6	0.0077346	0.035531	0.502677	1482	3	-2.937	0.017302	0.031904	0.938362	711	2	-2.937
Tctn1	6	0.99877	0.99878	1	21472	0	-2.6894	0.017318	0.031934	0.938362	712	2	-2.6894
Chst7	6	0.040145	0.13686	0.736158	3823	4	-6.2927	0.017341	0.03198	0.938362	713	2	-6.2927
LOC103159171	6	0.0040095	0.019273	0.418009	967	5	-5.6242	0.017344	0.031986	0.938362	714	1	-5.6242
Kcne4	6	0.25027	0.50159	1	10287	3	-2.3767	0.017356	0.032007	0.938362	715	2	-2.3767
Ctcf	6	0.28115	0.541	1	10919	1	-3.3358	0.017425	0.032128	0.938362	716	2	-3.3358
Bysl	6	0.61852	0.81694	1	15881	3	-5.7972	0.017433	0.032141	0.938362	717	2	-5.7972
Trim3	6	0.11011	0.30259	0.894609	6978	4	-5.47	0.017443	0.032162	0.938362	718	1	-5.47
Suv39h1	6	0.15405	0.36923	0.952671	8088	3	-5.83	0.017471	0.032223	0.938362	719	2	-5.83
Acot11	6	0.32606	0.59605	1	11886	2	-5.6436	0.017492	0.032257	0.938362	720	1	-5.6436
Ptprg	6	0.0009218	0.0047876	0.279749	364	3	-4.2548	0.017518	0.032301	0.938362	721	2	-4.2548
Shb	6	0.086752	0.25129	0.859133	6020	4	-6.0508	0.017541	0.032346	0.938362	722	1	-6.0508
Prox1	6	0.26726	0.52362	1	10618	4	-4.6265	0.017556	0.032374	0.938362	723	2	-4.6265
Serpinb10	6	0.23705	0.48445	1	10038	3	-1.6999	0.01758	0.032417	0.938362	724	2	-1.6999
LOC103164574	6	0.10625	0.29471	0.890933	6825	3	-3.1709	0.017639	0.032525	0.938362	725	1	-3.1709
Lama5	6	0.29438	0.55759	1	11223	3	-2.5373	0.01768	0.032592	0.938362	726	2	-2.5373
Cd164l2	6	0.58461	0.7927	1	15431	3	-5.6039	0.017735	0.032685	0.938362	727	2	-5.6039
Htr6	6	0.081269	0.2387	0.850895	5782	2	-3.0968	0.017781	0.032758	0.938362	728	2	-3.0968
Nbea	6	0.15377	0.36883	0.952196	8082	1	-4.5608	0.017786	0.032769	0.938362	729	1	-4.5608
CTRLX05986	1	0.98221	0.98227	1	20380	0	1.1018	0.017791	0.017744	0.903485	730	1	1.1018
Akt1	6	0.80365	0.90354	1	17760	2	-3.8647	0.017828	0.032841	0.938362	731	2	-3.8647
Rftn2	6	0.22609	0.46994	1	9789	3	-5.3064	0.017836	0.032851	0.938362	732	1	-5.3064
Ermard	6	0.63794	0.83048	1	16126	3	-6.2292	0.017906	0.032971	0.938362	733	2	-6.2292
Pih1d1	6	0.30949	0.5761	1	11541	4	-5.0001	0.017934	0.033024	0.938362	734	1	-5.0001
Lin7a	6	0.34866	0.62042	1	12283	3	-5.6347	0.017953	0.033055	0.938362	735	2	-5.6347
Ercc6	6	0.023972	0.091922	0.6549	2897	3	-6.0171	0.017983	0.033113	0.938362	736	1	-6.0171
Nosip	6	0.94937	0.96417	1	19579	1	-3.7555	0.018007	0.033159	0.938362	737	2	-3.7555
Cercam	6	0.014773	0.063784	0.590294	2237	3	-6.3008	0.018032	0.033194	0.938362	738	1	-6.3008
Ercc8	6	0.90141	0.9508	1	18990	1	-5.537	0.018086	0.033281	0.938362	739	2	-5.537
CTRLX19169	1	0.98189	0.98193	1	20373	0	0.9491	0.018107	0.018049	0.903485	740	1	0.9491
Slc27a6	6	0.02708	0.10076	0.674148	3079	3	-4.6109	0.01813	0.033363	0.938362	741	1	-4.6109
Bcl3	6	0.00219	0.010914	0.35291	638	3	-2.99	0.018148	0.03339	0.938362	742	2	-2.99
Gjb5	6	0.8003	0.90202	1	17720	1	-1.2312	0.018172	0.033429	0.938362	743	2	-1.2312
Nde1	6	0.016601	0.069965	0.603722	2399	5	-6.0626	0.018179	0.033438	0.938362	744	1	-6.0626
Tmem109	6	0.26771	0.5242	1	10627	4	-5.8246	0.018188	0.03345	0.938362	745	2	-5.8246
Smim17	6	0.062344	0.19378	0.807094	4927	1	-1.1123	0.018203	0.033476	0.938362	746	2	-1.1123
Sez6l2	6	0.089156	0.25679	0.864715	6117	4	-5.4332	0.018228	0.033518	0.938362	747	1	-5.4332
CTRLX09511	1	0.98177	0.98181	1	20368	0	1.1714	0.018231	0.018168	0.903485	748	1	1.1714
Mvb12a	6	0.30578	0.57158	1	11456	2	-1.89	0.01825	0.033561	0.938362	749	2	-1.89
Ehbp1	6	0.94555	0.96276	1	19513	1	-4.3807	0.018277	0.033617	0.938362	750	1	-4.3807
Caskin2	6	0.66502	0.84654	1	16434	1	-3.0493	0.018321	0.033685	0.938362	751	2	-3.0493
Garnl3	6	0.36472	0.6324	1	12521	3	-3.9377	0.018327	0.033698	0.938362	752	1	-3.9377
Ccl16	6	0.92607	0.95673	1	19246	1	-4.2714	0.018369	0.033767	0.938362	753	2	-4.2714
Psmc3ip	6	0.084747	0.24676	0.856934	5928	2	-2.8529	0.0184	0.033828	0.938362	754	2	-2.8529
Maml2	6	0.09094	0.26082	0.86637	6205	5	-6.4147	0.018425	0.033869	0.938362	755	1	-6.4147
LOC103159380	6	0.59824	0.8025	1	15623	3	-2.5898	0.018463	0.033943	0.938362	756	2	-2.5898
Phykpl	6	0.26245	0.51751	1	10521	3	-5.7541	0.018474	0.033959	0.938362	757	1	-5.7541
Fbxo25	6	0.71881	0.86732	1	16898	1	-2.9128	0.018511	0.034017	0.938362	758	2	-2.9128
Map3k3	6	0.61468	0.81417	1	15835	1	-4.1592	0.018572	0.034133	0.938362	759	1	-4.1592
Crtac1	6	0.81482	0.90882	1	17903	1	-5.5049	0.018574	0.034136	0.938362	760	2	-5.5049
Slc29a2	6	0.56991	0.78213	1	15215	2	-2.1125	0.018582	0.034148	0.938362	761	2	-2.1125
CTRLX12287	1	0.98137	0.98142	1	20352	0	0.87311	0.01863	0.018581	0.903485	762	1	0.87311
LOC100760352	6	0.58535	0.79325	1	15440	2	-1.5577	0.018661	0.034284	0.938362	763	2	-1.5577
LOC100758624	6	0.59709	0.80168	1	15604	2	-4.2724	0.018669	0.034301	0.938362	764	2	-4.2724
Xirp1	6	0.022394	0.087272	0.643973	2797	4	-5.9492	0.01867	0.034302	0.938362	765	1	-5.9492
Arid5b	6	0.15585	0.37188	0.953463	8135	4	-6.0806	0.018719	0.034386	0.938362	766	1	-6.0806
Znf397	6	0.11787	0.31459	0.907141	7171	3	-3.609	0.018765	0.034458	0.938362	767	2	-3.609
LOC100757909	6	0.67965	0.85206	1	16570	1	-5.8587	0.018768	0.034463	0.938362	768	1	-5.8587
CTRLX03455	1	0.98121	0.98124	1	20346	0	0.93126	0.018788	0.01873	0.903485	769	1	0.93126
Sirt2	6	0.21473	0.45473	1	9563	3	-5.2749	0.018789	0.034506	0.938362	770	2	-5.2749
Rab2b	6	0.33697	0.60888	1	12116	3	-5.7559	0.018817	0.034557	0.938362	771	1	-5.7559
LOC100752165	6	0.70521	0.86195	1	16777	1	-2.9064	0.018837	0.034593	0.938362	772	2	-2.9064
Emp3	6	0.27714	0.53601	1	10835	4	-5.2887	0.018866	0.03464	0.938362	773	1	-5.2887
Auh	6	0.92992	0.95779	1	19290	1	-3.2948	0.018869	0.034643	0.938362	774	2	-3.2948
Stx12	6	0.97834	0.97927	1	20243	1	-4.1467	0.018885	0.034669	0.938362	775	2	-4.1467
Lgi2	6	0.62067	0.81842	1	15908	3	-3.287	0.018893	0.034688	0.938362	776	2	-3.287
Map2k5	6	0.98612	0.98621	1	20556	0	-5.4781	0.018964	0.034824	0.938362	777	2	-5.4781
LOC100760559	6	0.84731	0.92484	1	18284	1	-3.8759	0.01898	0.034852	0.938362	778	2	-3.8759
Rab4b	6	0.01927	0.078001	0.623894	2583	4	-5.518	0.019004	0.034888	0.938362	779	2	-5.518
CTRLX07282	1	0.98095	0.98097	1	20336	0	0.83552	0.019054	0.019004	0.903485	780	1	0.83552
Laptm5	6	0.92795	0.95726	1	19268	1	-3.8918	0.019069	0.035005	0.938362	781	2	-3.8918
LOC100769463	6	0.47717	0.71507	1	14018	2	-5.3332	0.019141	0.035127	0.938362	782	2	-5.3332
Dusp6	6	0.0066856	0.03106	0.481483	1362	3	-6.261	0.019157	0.03515	0.938362	783	2	-6.261
LOC100755734	6	0.090399	0.25959	0.86545	6181	3	-5.8867	0.019161	0.035154	0.938362	784	1	-5.8867
Spata2l	6	0.41796	0.67179	1	13225	3	-5.6177	0.019189	0.035212	0.938362	785	2	-5.6177
Ephx3	6	0.29493	0.55824	1	11232	4	-5.968	0.019197	0.035224	0.938362	786	2	-5.968
LOC100774485	6	0.92502	0.95646	1	19236	1	-3.6821	0.019213	0.035251	0.938362	787	2	-3.6821
Tmco6	6	0.0080618	0.036908	0.506346	1521	3	-4.9317	0.019259	0.035324	0.939017	788	1	-4.9317
Plin3	6	0.097299	0.27511	0.87878	6461	4	-5.6374	0.019308	0.035409	0.939017	789	1	-5.6374
Phkg1	6	0.41968	0.67307	1	13247	1	-3.914	0.01935	0.03549	0.939017	790	2	-3.914
LOC103164035	6	0.73054	0.87194	1	16999	2	-5.6519	0.019357	0.035499	0.939017	791	1	-5.6519
Capn11	6	0.09468	0.26921	0.874243	6352	4	-6.0301	0.019406	0.035577	0.939017	792	1	-6.0301
Ca2	6	0.8509	0.92673	1	18332	2	-6.073	0.019415	0.035595	0.939017	793	2	-6.073
LOC107976989	6	0.040801	0.13864	0.739811	3855	3	-5.7559	0.019423	0.035609	0.939017	794	2	-5.7559
LOC100771471	6	0.81495	0.90887	1	17907	2	-5.3327	0.019455	0.035661	0.939017	795	1	-5.3327
C3ar1	6	0.41847	0.67217	1	13233	2	-0.48712	0.019536	0.035805	0.939265	796	2	-0.48712
Cachd1	6	0.38761	0.64947	1	12804	3	-4.6884	0.019561	0.035853	0.939265	797	2	-4.6884
Lace1	6	0.023423	0.090335	0.650613	2864	4	-5.6836	0.019569	0.035868	0.939265	798	2	-5.6836
Fam180b	6	0.96546	0.97118	1	19889	1	-3.359	0.019601	0.035922	0.939265	799	2	-3.359
Adprh	6	0.25747	0.51104	1	10428	3	-6.1328	0.019602	0.035923	0.939265	800	1	-6.1328
Ick	6	0.37187	0.63768	1	12619	3	-5.1533	0.019609	0.035928	0.939265	801	2	-5.1533
Dhx40	6	0.61628	0.81533	1	15852	1	-4.5481	0.019651	0.036011	0.940329	802	1	-4.5481
Shisa4	6	0.98376	0.98386	1	20447	1	-5.6928	0.0197	0.036109	0.940894	803	1	-5.6928
F12	6	0.53769	0.75908	1	14801	3	-5.7475	0.019707	0.036119	0.940894	804	2	-5.7475
Spata2	6	0.33975	0.6121	1	12171	4	-5.8907	0.019749	0.036193	0.941694	805	1	-5.8907
CTRLX02826	1	0.98021	0.98022	1	20301	0	0.63507	0.019793	0.019781	0.903485	806	1	0.63507
Ccdc173	6	0.44985	0.69519	1	13653	2	-5.7325	0.019896	0.036451	0.946172	807	1	-5.7325
Slc26a4	6	0.93721	0.96	1	19376	1	-2.1549	0.019945	0.036536	0.947244	808	1	-2.1549
Elf3	6	0.33306	0.60427	1	12028	4	-5.1547	0.020043	0.036709	0.949115	809	1	-5.1547
LOC100766228	6	0.60063	0.8042	1	15659	1	-5.1162	0.020066	0.03674	0.949115	810	2	-5.1162
Gpr25	6	0.15193	0.36608	0.95036	8037	4	-5.231	0.020116	0.036824	0.949115	811	2	-5.231
Gfra2	6	0.15581	0.37181	0.953463	8133	3	-5.7731	0.020149	0.036879	0.949396	812	2	-5.7731
Rfx5	6	0.83342	0.91787	1	18116	2	-5.9362	0.020239	0.037035	0.952302	813	1	-5.9362
2009-03-01	6	0.33177	0.60281	1	12001	3	-6.3077	0.020288	0.037109	0.952995	814	1	-6.3077
Tmem117	5	0.297	0.52732	1	11276	2	-5.4212	0.020332	0.034211	0.938362	815	1	-5.4212
LOC107977642	6	0.56189	0.77633	1	15114	3	-5.3699	0.020338	0.037202	0.952995	816	2	-5.3699
CTRLX09193	1	0.97958	0.9796	1	20280	0	0.79642	0.020425	0.020398	0.903485	817	1	0.79642
Gdf7	6	0.0221	0.08643	0.642085	2778	4	-3.7782	0.020435	0.037379	0.952995	818	1	-3.7782
LOC107977020	6	0.35982	0.62867	1	12449	2	-6.2155	0.020479	0.037439	0.952995	819	2	-6.2155
Ubac2	6	0.13309	0.33791	0.928411	7550	4	-4.9784	0.020595	0.037633	0.952995	820	2	-4.9784
Sdcbp	6	0.84922	0.92583	1	18311	2	-2.8228	0.020611	0.037664	0.952995	821	2	-2.8228
LOC100771787	5	0.19129	0.41535	0.981727	9010	2	-1.5921	0.020618	0.034447	0.938362	822	1	-1.5921
Lrrfip2	6	0.017407	0.072383	0.607404	2465	5	-5.5692	0.020631	0.037705	0.952995	823	1	-5.5692
Nek4	6	0.10319	0.28801	0.886637	6702	4	-3.9598	0.020636	0.037714	0.952995	824	2	-3.9598
Ankrd40	6	0.26939	0.52633	1	10666	4	-4.6937	0.020644	0.037733	0.952995	825	2	-4.6937
Tob1	6	0.46325	0.70492	1	13837	3	-6.4297	0.02068	0.037797	0.952995	826	1	-6.4297
Pdpn	5	0.80515	0.89673	1	17783	2	-5.7831	0.0207	0.034512	0.938362	827	1	-5.7831
Fitm2	6	0.20236	0.43787	0.993822	9276	4	-5.7027	0.020719	0.037854	0.952995	828	2	-5.7027
LOC100761051	6	0.39904	0.6579	1	12959	1	-5.363	0.020729	0.037869	0.952995	829	1	-5.363
LOC100774248	6	0.0065865	0.030631	0.48104	1339	3	-2.4831	0.020777	0.037953	0.952995	830	2	-2.4831
LOC100755463	6	0.11242	0.30618	0.897111	7040	3	-6.397	0.020827	0.038036	0.952995	831	1	-6.397
LOC100771782	6	0.51634	0.74373	1	14533	3	-5.8589	0.020844	0.038065	0.952995	832	2	-5.8589
Ptpn3	6	0.0022752	0.011325	0.354915	666	4	-5.0428	0.020876	0.038125	0.952995	833	1	-5.0428
Ano1	6	0.060689	0.18968	0.801763	4854	2	-5.315	0.020911	0.03819	0.952995	834	2	-5.315
LOC100771627	5	0.99651	0.99649	1	21192	0	-5.4616	0.020945	0.034698	0.938362	835	1	-5.4616
Hmox1	6	0.04633	0.15315	0.760245	4138	5	-6.314	0.020974	0.038291	0.952995	836	1	-6.314
Arid3b	6	0.59805	0.80237	1	15617	3	-5.7291	0.020986	0.03831	0.952995	837	2	-5.7291
Lrsam1	6	0.19766	0.43134	0.990727	9165	4	-5.6323	0.021023	0.03838	0.952995	838	1	-5.6323
Habp4	6	0.84652	0.92442	1	18273	2	-3.9355	0.021072	0.038469	0.952995	839	1	-3.9355
CTRLX14122	1	0.9789	0.97892	1	20260	0	0.99202	0.021097	0.021032	0.903485	840	1	0.99202
Flt3lg	6	0.68779	0.85518	1	16634	2	-5.885	0.021112	0.038546	0.952995	841	2	-5.885
Prr36	6	0.28269	0.54291	1	10956	4	-5.5275	0.021129	0.038576	0.952995	842	2	-5.5275
Uaca	6	0.72537	0.86985	1	16962	2	-1.4544	0.021146	0.038611	0.952995	843	2	-1.4544
LOC100753840	6	0.50457	0.73508	1	14385	3	-3.419	0.021154	0.038623	0.952995	844	2	-3.419
LOC100760759	6	0.042311	0.14261	0.746958	3930	4	-3.0013	0.02117	0.038647	0.952995	845	1	-3.0013
Nek5	6	0.97523	0.97703	1	20154	1	-2.974	0.021219	0.03874	0.952995	846	1	-2.974
LOC100768685	5	0.98464	0.9847	1	20475	0	-6.441	0.021231	0.034945	0.938362	847	1	-6.441
Bad	6	0.21904	0.46043	1	9644	2	-5.687	0.021263	0.038811	0.952995	848	2	-5.687
LOC100752402	6	0.10578	0.29367	0.889866	6811	4	-5.9063	0.021268	0.038825	0.952995	849	1	-5.9063
Slc11a1	6	0.31034	0.57713	1	11565	4	-5.7493	0.02128	0.038845	0.952995	850	2	-5.7493
Cd209	6	0.99206	0.99208	1	20878	0	-5.4393	0.021317	0.038907	0.952995	851	1	-5.4393
Cul3	6	0.90638	0.9519	1	19052	1	-3.4757	0.021339	0.038947	0.952995	852	2	-3.4757
LOC100758661	6	5.3721e-06	3.9544e-05	0.064604	13	5	-5.9988	0.021366	0.038993	0.952995	853	1	-5.9988
Sox10	6	0.05096	0.16514	0.777221	4364	5	-5.4911	0.021415	0.039079	0.952995	854	1	-5.4911
Prss16	6	0.14603	0.35734	0.944052	7886	4	-2.2985	0.021423	0.039094	0.952995	855	2	-2.2985
Triobp	6	0.25527	0.50817	1	10382	3	-6.1643	0.021464	0.039166	0.952995	856	1	-6.1643
Krt2	6	0.18259	0.41032	0.97966	8797	3	-4.4707	0.021513	0.03925	0.952995	857	1	-4.4707
Tmem185a	6	0.70041	0.86005	1	16736	2	-6.1447	0.021562	0.039335	0.952995	858	1	-6.1447
Wsb2	6	0.62275	0.81981	1	15934	3	-4.6658	0.021567	0.039345	0.952995	859	2	-4.6658
LOC100755455	6	0.18201	0.40951	0.97942	8783	3	-3.9138	0.021611	0.039418	0.952995	860	1	-3.9138
Dctn1	6	0.16202	0.38096	0.961299	8284	4	-6.0603	0.02166	0.039507	0.952995	861	1	-6.0603
Tti2	6	0.99971	0.99972	1	21709	0	-3.8415	0.021708	0.039593	0.952995	862	1	-3.8415
Syne4	6	0.012134	0.05345	0.560548	1966	4	-3.8151	0.021754	0.039665	0.952995	863	2	-3.8151
Camkk1	6	0.52794	0.75207	1	14672	3	-5.8954	0.021757	0.039667	0.952995	864	1	-5.8954
Phrf1	6	0.38037	0.64405	1	12719	3	-3.1329	0.021762	0.039673	0.952995	865	2	-3.1329
Lgals1	6	0.62631	0.82232	1	15968	3	-2.7548	0.021788	0.039723	0.952995	866	2	-2.7548
Hmx2	6	0.39332	0.6537	1	12879	3	-6.1369	0.021806	0.039749	0.952995	867	1	-6.1369
Ush1c	6	0.6336	0.82743	1	16069	2	-5.8502	0.021855	0.039832	0.952995	868	1	-5.8502
Dpp3	6	0.44551	0.69201	1	13582	3	-6.1278	0.021907	0.039925	0.952995	869	2	-6.1278
Slc30a1	6	0.018327	0.075155	0.615347	2529	2	-1.5369	0.02201	0.040092	0.952995	870	2	-1.5369
LOC100755927	6	0.22764	0.47204	1	9817	4	-5.0551	0.022078	0.040211	0.952995	871	2	-5.0551
LOC100771290	6	0.96503	0.97096	1	19885	1	-5.0794	0.022149	0.040328	0.952995	872	1	-5.0794
Runx3	6	0.19665	0.42994	0.989615	9145	3	-2.7735	0.022198	0.040412	0.952995	873	1	-2.7735
Tuba4a	6	0.98963	0.98969	1	20748	0	-3.249	0.022215	0.040438	0.952995	874	2	-3.249
Fundc1	6	0.41152	0.66705	1	13132	2	-4.2425	0.022224	0.040454	0.952995	875	2	-4.2425
Prelp	6	0.048225	0.1581	0.768655	4226	2	-3.9754	0.022232	0.040471	0.952995	876	2	-3.9754
LOC100773073	6	0.29824	0.56231	1	11300	3	-4.9468	0.022247	0.040495	0.952995	877	1	-4.9468
Znf503	6	0.94221	0.96163	1	19452	1	-5.7983	0.022267	0.040528	0.952995	878	2	-5.7983
Enpp3	6	0.72877	0.87123	1	16991	2	-2.6281	0.022353	0.040678	0.952995	879	2	-2.6281
Catsper3	6	0.55007	0.76793	1	14948	3	-4.9413	0.022393	0.040753	0.952995	880	1	-4.9413
Dusp16	6	0.056658	0.17964	0.792042	4649	5	-6.8363	0.022442	0.040838	0.952995	881	1	-6.8363
Lrrc10b	6	0.22939	0.47436	1	9864	3	-5.0037	0.022456	0.040864	0.952995	882	2	-5.0037
Tctn2	6	0.98496	0.98508	1	20490	0	-3.4461	0.02249	0.040921	0.952995	883	2	-3.4461
Cldn8	6	0.069736	0.21159	0.824018	5268	2	-0.63783	0.022491	0.040922	0.952995	884	1	-0.63783
Fsd2	6	0.72466	0.86957	1	16958	2	-5.5978	0.022499	0.040936	0.952995	885	2	-5.5978
LOC100754462	6	0.50877	0.73817	1	14445	3	-4.9269	0.02254	0.041021	0.952995	886	1	-4.9269
Mmp7	6	0.88307	0.94419	1	18777	2	-3.8698	0.022542	0.041025	0.952995	887	2	-3.8698
LOC100762270	6	0.09383	0.26731	0.871696	6328	3	-5.8805	0.022551	0.041042	0.952995	888	2	-5.8805
Rit1	6	0.63893	0.83118	1	16140	2	-4.1931	0.022585	0.041106	0.952995	889	2	-4.1931
Plac8	6	0.1841	0.41243	0.980825	8832	4	-5.6486	0.022629	0.041183	0.952995	890	2	-5.6486
Eqtn	6	0.54535	0.76458	1	14895	2	-5.3441	0.022638	0.041196	0.952995	891	1	-5.3441
Alkbh7	6	0.39816	0.65723	1	12944	2	-3.9402	0.022646	0.041211	0.952995	892	2	-3.9402
LOC103159238	6	0.034341	0.12109	0.711279	3498	4	-5.9185	0.022736	0.041362	0.952995	893	1	-5.9185
Nr6a1	6	0.94376	0.96216	1	19476	1	-2.7215	0.022811	0.041487	0.952995	894	2	-2.7215
Abhd15	6	0.15398	0.36913	0.952561	8086	3	-4.6793	0.022834	0.041531	0.952995	895	1	-4.6793
Gan	6	0.44159	0.68911	1	13531	3	-3.0695	0.022837	0.041536	0.952995	896	2	-3.0695
Trmo	6	0.13481	0.34054	0.930479	7597	2	-3.2499	0.022854	0.041567	0.952995	897	2	-3.2499
LOC100764948	6	0.60979	0.81064	1	15758	2	-3.9114	0.022863	0.041585	0.952995	898	2	-3.9114
Ptprcap	6	0.50025	0.73192	1	14339	3	-3.0254	0.022882	0.041617	0.952995	899	1	-3.0254
Itpripl2	6	0.26418	0.51969	1	10557	3	-3.3806	0.022924	0.041697	0.952995	900	2	-3.3806
Dzip3	6	0.99871	0.99871	1	21461	0	-3.7012	0.022931	0.041714	0.952995	901	1	-3.7012
LOC100758957	6	0.04689	0.1546	0.762846	4164	4	-5.1265	0.022985	0.041809	0.952995	902	2	-5.1265
Srms	6	0.0037442	0.018086	0.408179	923	4	-5.2902	0.023011	0.041855	0.952995	903	2	-5.2902
Znf703	6	0.24432	0.4939	1	10171	4	-4.9576	0.023029	0.041886	0.952995	904	1	-4.9576
Ppp1r32	6	0.11028	0.30284	0.894749	6984	1	-0.68567	0.023037	0.041899	0.952995	905	2	-0.68567
Hus1b	6	0.040495	0.13779	0.738093	3839	4	-6.0177	0.023046	0.041914	0.952995	906	2	-6.0177
LOC107977045	6	0.66265	0.84568	1	16411	2	-4.4604	0.023078	0.041967	0.952995	907	1	-4.4604
Tmem179	6	0.012571	0.055195	0.565623	2007	3	-5.8448	0.023098	0.042008	0.952995	908	2	-5.8448
LOC100761818	6	0.22593	0.46974	1	9785	4	-3.2982	0.023115	0.042043	0.952995	909	2	-3.2982
LOC100768826	6	0.62806	0.82353	1	15988	2	-5.7558	0.023127	0.04206	0.952995	910	1	-5.7558
Yif1b	6	0.17609	0.40118	0.973034	8641	4	-5.6604	0.023176	0.042138	0.952995	911	1	-5.6604
LOC100759508	6	0.39274	0.6533	1	12867	3	-5.2972	0.023203	0.042181	0.952995	912	2	-5.2972
LOC107980067	6	0.81458	0.9087	1	17901	2	-4.8139	0.023238	0.042244	0.952995	913	2	-4.8139
LOC100762197	6	0.92762	0.95717	1	19263	1	-1.9209	0.023273	0.042294	0.952995	914	2	-1.9209
Gipc3	6	0.5706	0.78261	1	15224	3	-6.1898	0.023274	0.042295	0.952995	915	1	-6.1898
Rasgrp1	6	0.10401	0.28982	0.887397	6738	5	-5.0655	0.023322	0.042382	0.952995	916	1	-5.0655
LOC100760951	6	0.10509	0.29222	0.888912	6787	3	-2.7031	0.023325	0.042385	0.952995	917	2	-2.7031
LOC100689011	6	0.071577	0.21598	0.829113	5358	4	-6.1711	0.023334	0.042398	0.952995	918	2	-6.1711
Slc39a3	6	0.08438	0.2459	0.856804	5904	4	-5.4059	0.02342	0.042551	0.952995	919	1	-5.4059
Wfdc2	6	0.075689	0.22572	0.840062	5534	4	-5.4755	0.023439	0.04259	0.952995	920	2	-5.4755
LOC103160794	6	0.45203	0.69679	1	13688	3	-4.8473	0.023457	0.042624	0.952995	921	2	-4.8473
Dytn	6	0.12367	0.32351	0.917203	7303	4	-5.7718	0.023466	0.042641	0.952995	922	2	-5.7718
Scnm1	6	0.21184	0.45079	0.999511	9504	3	-3.6971	0.023469	0.042646	0.952995	923	1	-3.6971
Pole4	6	0.49597	0.72876	1	14273	3	-5.9483	0.023492	0.042684	0.952995	924	2	-5.9483
Agrn	6	0.56857	0.78115	1	15205	3	-5.1089	0.023518	0.042725	0.952995	925	1	-5.1089
Spdef	6	0.27811	0.53725	1	10859	3	-4.5673	0.023527	0.042739	0.952995	926	2	-4.5673
Cntnap5	6	0.030998	0.1119	0.695472	3315	4	-5.0601	0.023563	0.042799	0.952995	927	2	-5.0601
Dkkl1	6	0.53815	0.75938	1	14811	2	-5.7561	0.023567	0.042804	0.952995	928	1	-5.7561
Spc24	6	0.9998	0.9998	1	21742	0	-4.5931	0.023616	0.042878	0.953469	929	1	-4.5931
CTRLX13540	1	0.97638	0.9764	1	20194	0	0.75653	0.023623	0.023537	0.92779	930	1	0.75653
Dchs1	6	0.49727	0.72973	1	14289	2	-3.741	0.023651	0.042931	0.953469	931	2	-3.741
LOC100760909	6	0.18784	0.41769	0.982712	8924	3	-5.9761	0.023665	0.042956	0.953469	932	1	-5.9761
Pkd2l2	6	0.013061	0.057115	0.567293	2070	5	-5.9478	0.023713	0.043044	0.95433	933	1	-5.9478
Ubxn6	6	0.51483	0.74261	1	14520	3	-3.9894	0.023739	0.043087	0.95433	934	2	-3.9894
Esrp1	6	0.47561	0.71395	1	13997	3	-4.8256	0.023762	0.043125	0.95433	935	1	-4.8256
LOC100750553	4	0.47956	0.65471	1	14047	1	-0.85109	0.023794	0.031629	0.938362	936	1	-0.85109
CTRLX10709	1	0.9762	0.97621	1	20187	0	0.87353	0.023797	0.02371	0.92779	937	1	0.87353
Phka2	6	0.36665	0.63383	1	12547	3	-5.8368	0.023811	0.043215	0.954367	938	1	-5.8368
Col4a3	6	0.18788	0.41775	0.98272	8926	4	-5.7143	0.023819	0.043229	0.954367	939	2	-5.7143
Ankrd2	6	0.25168	0.50346	1	10327	4	-5.3296	0.02386	0.0433	0.954367	940	1	-5.3296
Etv5	6	0.18425	0.41265	0.980825	8835	4	-5.6197	0.023889	0.043355	0.954367	941	2	-5.6197
Pla2g7	6	0.60093	0.80441	1	15663	3	-5.3291	0.023909	0.043388	0.954367	942	1	-5.3291
Usp7	6	0.99516	0.99521	1	21092	0	-4.1119	0.023958	0.04348	0.954829	943	1	-4.1119
Lamtor5	6	0.018861	0.076755	0.619975	2556	4	-2.0266	0.023987	0.043533	0.954829	944	2	-2.0266
Brk1	6	0.34765	0.61964	1	12275	2	-4.2108	0.024007	0.04357	0.954829	945	1	-4.2108
Zcchc14	5	0.13516	0.32142	0.914766	7605	3	-5.1925	0.024045	0.037365	0.952995	946	1	-5.1925
Slc26a11	6	0.80197	0.90277	1	17745	2	-5.0219	0.024055	0.043667	0.954829	947	2	-5.0219
LOC100754168	6	0.03757	0.12991	0.724352	3678	3	-2.2865	0.024067	0.043689	0.954829	948	2	-2.2865
Tctex1d4	6	0.45097	0.69602	1	13672	2	-5.9204	0.024102	0.043745	0.954829	949	2	-5.9204
Tex40	6	0.031487	0.11323	0.698763	3340	3	-5.7455	0.024104	0.043748	0.954829	950	1	-5.7455
Kiaa0556	5	0.29879	0.52917	1	11315	3	-5.5693	0.024126	0.037429	0.952995	951	1	-5.5693
Kmt2d	6	0.046549	0.15372	0.761759	4146	4	-5.661	0.024153	0.043832	0.954829	952	1	-5.661
Atp11b	5	0.13976	0.32977	0.922202	7719	3	-6.11	0.024167	0.037465	0.952995	953	1	-6.11
Gpc6	6	0.16811	0.38977	0.966942	8428	3	-4.9437	0.024202	0.04391	0.954829	954	1	-4.9437
LOC100772075	5	0.96206	0.96277	1	19823	1	-1.6045	0.024208	0.037503	0.952995	955	1	-1.6045
Prap1	6	0.40682	0.6636	1	13074	3	-5.1454	0.024218	0.04393	0.954829	956	2	-5.1454
LOC100765811	6	0.99878	0.99878	1	21474	0	-5.1696	0.024251	0.043981	0.954829	957	1	-5.1696
Stag2	6	0.29705	0.5608	1	11278	2	-4.8919	0.024254	0.043985	0.954829	958	2	-4.8919
Tgfbr3l	6	0.14571	0.35691	0.944044	7877	3	-5.5538	0.024289	0.04405	0.954829	959	2	-5.5538
Nox4	6	0.90967	0.95264	1	19080	1	-4.5553	0.0243	0.044063	0.954829	960	1	-4.5553
Semg1	5	0.49294	0.71705	1	14231	1	-4.6378	0.02433	0.0376	0.952995	961	1	-4.6378
LOC100773537	4	0.91479	0.9172	1	19128	1	-4.5929	0.024349	0.032126	0.938362	962	1	-4.5929
Epb41l4b	6	0.62181	0.8192	1	15923	3	-5.3629	0.024423	0.044276	0.954864	963	2	-5.3629
Kazald1	6	0.099325	0.27964	0.882692	6531	4	-5.7173	0.024441	0.0443	0.954864	964	2	-5.7173
Hs3st5	6	0.64391	0.83471	1	16195	3	-4.3291	0.024477	0.044381	0.954864	965	2	-4.3291
LOC100752871	6	0.0375	0.1297	0.723732	3676	5	-6.1708	0.024495	0.044418	0.954864	966	1	-6.1708
Rapgef3	6	0.046166	0.15272	0.760245	4124	3	-5.3912	0.024576	0.04457	0.954864	967	2	-5.3912
Ankrd29	6	0.26839	0.52509	1	10640	4	-5.9188	0.024593	0.044602	0.954864	968	1	-5.9188
Ube2j2	5	0.44142	0.66935	1	13529	3	-6.4855	0.024615	0.037844	0.952995	969	1	-6.4855
Ntn3	6	0.61114	0.81166	1	15780	3	-5.4526	0.024621	0.044651	0.954864	970	2	-5.4526
Arl6ip6	6	0.060594	0.18943	0.801763	4849	4	-5.427	0.02463	0.04467	0.954864	971	2	-5.427
Srpra	6	0.57125	0.78307	1	15237	3	-4.7888	0.024641	0.044688	0.954864	972	1	-4.7888
Asxl1	6	0.48928	0.72386	1	14177	2	-2.8728	0.024739	0.044789	0.954864	973	1	-2.8728
LOC103160020	5	0.98611	0.98611	1	20554	0	-6.5497	0.024778	0.037986	0.952995	974	1	-6.5497
Fhad1	6	0.93497	0.95928	1	19346	1	-2.8584	0.024837	0.044868	0.954864	975	1	-2.8584
LOC100750437	6	0.10356	0.28879	0.887123	6715	5	-5.5918	0.024885	0.044904	0.954864	976	1	-5.5918
Morn4	6	0.86974	0.93678	1	18575	2	-4.1562	0.024934	0.04494	0.954864	977	1	-4.1562
Gnai2	6	0.20923	0.44722	0.998239	9434	3	-5.6201	0.024983	0.044975	0.954864	978	1	-5.6201
Arl15	6	0.65317	0.84121	1	16312	2	-4.5656	0.025032	0.045011	0.954864	979	1	-4.5656
LOC100769977	6	0.9987	0.99871	1	21459	0	-5.742	0.025129	0.045083	0.954864	980	1	-5.742
Nanog	6	0.57638	0.78675	1	15315	3	-4.9942	0.025178	0.045125	0.954864	981	1	-4.9942
Rwdd4	6	0.98554	0.98565	1	20519	0	-4.4657	0.025227	0.045166	0.954864	982	1	-4.4657
Islr2	6	0.923	0.95594	1	19213	1	-5.1464	0.025325	0.045249	0.954864	983	1	-5.1464
Irs1	6	0.97878	0.97961	1	20257	1	-5.0844	0.025373	0.045285	0.954864	984	1	-5.0844
Map4k2	6	0.17232	0.39581	0.970383	8539	3	-5.7459	0.025471	0.045367	0.955512	985	1	-5.7459
LOC100753711	2	0.89924	0.89929	1	18975	0	-2.2372	0.025498	0.026384	0.937411	986	1	-2.2372
LOC100753397	6	0.68994	0.85602	1	16653	2	-5.8997	0.02552	0.045412	0.955512	987	1	-5.8997
Fam168a	6	0.37448	0.63962	1	12648	2	-5.5421	0.025569	0.04545	0.955512	988	1	-5.5421
Dxo	6	0.39277	0.65332	1	12868	3	-4.9556	0.025617	0.04549	0.955512	989	1	-4.9556
Thoc7	6	0.40292	0.66076	1	13027	2	-4.7393	0.025812	0.045642	0.95771	990	1	-4.7393
LOC100767734	6	0.83064	0.91647	1	18089	2	-4.986	0.025861	0.045682	0.95771	991	1	-4.986
LOC100763784	6	0.77782	0.89202	1	17463	1	-5.9318	0.025959	0.045768	0.957881	992	1	-5.9318
Hacd3	6	0.32195	0.59114	1	11799	4	-5.5659	0.026008	0.045798	0.957881	993	1	-5.5659
Fa2h	6	0.077384	0.22966	0.844227	5611	4	-5.288	0.026105	0.045883	0.957881	994	1	-5.288
Sfxn5	6	0.21402	0.45378	1	9548	4	-4.8701	0.026203	0.045955	0.957881	995	1	-4.8701
Lrrc14b	6	0.073745	0.22111	0.834617	5448	4	-5.9335	0.026251	0.046001	0.957881	996	1	-5.9335
Ina	6	0.023134	0.089477	0.648752	2847	4	-5.5459	0.0263	0.04604	0.957881	997	1	-5.5459
CTRLX01146	1	0.97368	0.97371	1	20105	0	0.5875	0.026323	0.026235	0.937411	998	1	0.5875
Cd86	6	0.44164	0.68915	1	13533	2	-6.1926	0.026398	0.046121	0.958426	999	1	-6.1926
Itga10	6	0.45155	0.69645	1	13683	3	-5.3274	0.026446	0.046164	0.958426	1000	1	-5.3274
CTRLX19575	1	0.97354	0.97358	1	20098	0	0.51729	0.026456	0.026375	0.937411	1001	1	0.51729
LOC100761519	6	0.13998	0.34839	0.937998	7724	1	-4.5074	0.026495	0.046214	0.958426	1002	1	-4.5074
CTRLX14233	1	0.9735	0.97354	1	20097	0	0.56645	0.026497	0.026418	0.937411	1003	1	0.56645
Nfkbid	6	0.9837	0.98381	1	20445	1	-5.6818	0.026544	0.046252	0.958426	1004	1	-5.6818
Rab32	6	0.30469	0.57025	1	11437	4	-5.8614	0.026593	0.046291	0.958426	1005	1	-5.8614
CTRLX05020	1	0.97339	0.97344	1	20093	0	0.67386	0.026614	0.026534	0.937411	1006	1	0.67386
Ap1s3	5	0.781	0.8809	1	17499	2	-3.7999	0.02669	0.039608	0.952995	1007	1	-3.7999
LOC103164589	6	0.022541	0.087702	0.645609	2803	3	-5.7633	0.02669	0.046379	0.958426	1008	1	-5.7633
LOC100765849	6	0.73379	0.87327	1	17021	2	-5.1566	0.026739	0.046424	0.958426	1009	1	-5.1566
Neurod1	6	0.16318	0.38268	0.962271	8313	3	-2.724	0.026787	0.046467	0.958426	1010	1	-2.724
Mycl	6	0.018443	0.0755	0.616946	2534	4	-5.5379	0.026836	0.046504	0.958426	1011	1	-5.5379
Tnfrsf21	6	0.11133	0.30447	0.895749	7013	4	-5.4445	0.026934	0.046579	0.958665	1012	1	-5.4445
CTRLX13976	1	0.97298	0.973	1	20084	0	0.52961	0.027021	0.026929	0.937411	1013	1	0.52961
Kcnb2	6	0.077734	0.23044	0.844775	5629	5	-5.6767	0.027031	0.046662	0.958665	1014	1	-5.6767
Gltscr2	6	0.9999	0.9999	1	21796	0	-4.9103	0.02708	0.046691	0.958665	1015	1	-4.9103
LOC100773198	5	0.32684	0.55768	1	11902	1	-3.9219	0.027137	0.039992	0.952995	1016	1	-3.9219
Dram2	5	0.88585	0.92268	1	18822	1	-5.748	0.027218	0.040061	0.952995	1017	1	-5.748
LOC100753862	6	0.023243	0.089794	0.649461	2852	3	-4.0983	0.027226	0.046817	0.960364	1018	1	-4.0983
Shh	6	0.25064	0.50209	1	10298	2	-4.7409	0.02747	0.047018	0.961565	1019	1	-4.7409
Sema6d	6	0.007693	0.035359	0.502034	1477	5	-6.0372	0.027518	0.047061	0.961565	1020	1	-6.0372
Ttn	6	0.46237	0.70426	1	13826	3	-6.224	0.027567	0.047093	0.961565	1021	1	-6.224
Spta1	5	0.015911	0.060499	0.578281	2353	2	-5.3908	0.027624	0.040407	0.952995	1022	1	-5.3908
Nkrf	6	0.94606	0.96293	1	19521	1	-6.1446	0.027664	0.047178	0.961565	1023	1	-6.1446
CTRLX01952	1	0.97226	0.97228	1	20071	0	0.4946	0.027735	0.027652	0.937411	1024	1	0.4946
Ccdc42	6	0.13382	0.33905	0.929528	7568	3	-5.6587	0.027762	0.047256	0.961565	1025	1	-5.6587
Lrig2	6	0.62172	0.81914	1	15922	3	-4.6091	0.02781	0.047294	0.961565	1026	1	-4.6091
Stat2	6	0.95849	0.96782	1	19752	1	-5.8478	0.027859	0.04733	0.961565	1027	1	-5.8478
LOC100751718	6	0.30168	0.56656	1	11373	3	-4.9725	0.027908	0.047364	0.961565	1028	1	-4.9725
CTRLX13341	1	0.97205	0.97207	1	20067	0	0.61656	0.027951	0.027875	0.937411	1029	1	0.61656
Cad	6	0.74713	0.87876	1	17146	1	-5.2088	0.027956	0.047402	0.961565	1030	1	-5.2088
Syne2	6	0.3178	0.58617	1	11724	4	-5.9335	0.028151	0.047561	0.963009	1031	1	-5.9335
CTRLX01056	1	0.97184	0.97186	1	20061	0	0.55392	0.028159	0.02807	0.937411	1032	1	0.55392
LOC100764434	6	0.0013198	0.0067395	0.308719	453	2	-6.1713	0.028249	0.047643	0.963765	1033	1	-6.1713
Oxtr	6	0.019439	0.078518	0.625138	2592	4	-1.2919	0.028297	0.047687	0.963771	1034	1	-1.2919
Slc38a2	4	0.82042	0.86197	1	17963	1	-4.4501	0.028323	0.035642	0.939017	1035	1	-4.4501
Uap1l1	6	0.87738	0.941	1	18690	2	-5.0996	0.028346	0.047736	0.963844	1036	1	-5.0996
P3h3	6	0.25759	0.5112	1	10433	3	-5.6629	0.028395	0.047779	0.963844	1037	1	-5.6629
LOC100761009	6	0.086771	0.25134	0.859137	6021	4	-6.2535	0.028443	0.047823	0.963844	1038	1	-6.2535
CTRLX06291	1	0.97151	0.97152	1	20052	0	0.62363	0.028491	0.028395	0.937411	1039	1	0.62363
LOC100766805	6	0.25091	0.50245	1	10309	1	-5.2024	0.02854	0.047892	0.964359	1040	1	-5.2024
Cbs	6	0.32957	0.60022	1	11963	4	-6.2954	0.028638	0.047977	0.965133	1041	1	-6.2954
LOC107977001	5	0.91603	0.93474	1	19139	1	-2.5305	0.02868	0.041312	0.952995	1042	1	-2.5305
Tlr6	6	0.87101	0.93748	1	18592	2	-5.0511	0.028686	0.048019	0.965133	1043	1	-5.0511
LOC100761938	6	0.13426	0.33968	0.929865	7581	4	-5.949	0.028832	0.048149	0.966862	1044	1	-5.949
LOC100761987	5	0.99969	0.99969	1	21703	0	-3.9416	0.029005	0.041602	0.952995	1045	1	-3.9416
CTRLX19123	1	0.97099	0.97102	1	20038	0	0.55685	0.029015	0.028923	0.938362	1046	1	0.55685
Gja3	6	0.29679	0.56049	1	11272	4	-5.6267	0.029076	0.048334	0.967782	1047	1	-5.6267
Lrrc49	6	0.20161	0.43681	0.993735	9259	2	-5.7897	0.029173	0.04842	0.967782	1048	1	-5.7897
Actl10	6	0.058433	0.18405	0.795926	4737	3	-5.066	0.029222	0.048455	0.967782	1049	1	-5.066
Zbed4	6	0.50861	0.73806	1	14440	2	-5.5358	0.029319	0.048542	0.967782	1050	1	-5.5358
LOC100773844	6	0.14375	0.35403	0.941396	7828	2	-5.7442	0.029416	0.048616	0.967782	1051	1	-5.7442
LOC100764913	6	0.10927	0.30116	0.893885	6952	4	-5.6343	0.029513	0.048693	0.967782	1052	1	-5.6343
Gadd45b	6	0.5652	0.77873	1	15160	3	-5.1743	0.029562	0.048735	0.967782	1053	1	-5.1743
LOC100757481	6	0.011908	0.052552	0.557806	1943	5	-6.1098	0.02961	0.048777	0.967782	1054	1	-6.1098
Tnfsf15	5	0.44585	0.67349	1	13589	2	-6.6071	0.029694	0.042172	0.952995	1055	1	-6.6071
Mcfd2	6	0.089952	0.2586	0.86545	6148	5	-5.5039	0.029708	0.048843	0.967782	1056	1	-5.5039
LOC103161045	6	0.5214	0.74733	1	14602	3	-5.5297	0.029756	0.048881	0.967782	1057	1	-5.5297
Slc39a1	6	0.091715	0.26257	0.866728	6244	5	-6.3762	0.029805	0.048924	0.967782	1058	1	-6.3762
Vgll2	6	0.27441	0.5326	1	10777	2	-6.3935	0.029854	0.048958	0.967782	1059	1	-6.3935
Pkn2	6	0.35292	0.62359	1	12348	2	-3.8416	0.029902	0.049004	0.967782	1060	1	-3.8416
Ceacam16	6	0.049466	0.16125	0.771637	4285	5	-5.9868	0.029951	0.049041	0.967782	1061	1	-5.9868
CTRLX19307	1	0.96999	0.97008	1	20008	0	0.48743	0.030012	0.029917	0.938362	1062	1	0.48743
Dydc2	5	0.99992	0.99992	1	21823	0	-1.8441	0.030059	0.042498	0.952995	1063	1	-1.8441
LOC100763303	6	0.86896	0.93634	1	18566	2	-6.2831	0.030097	0.049158	0.967782	1064	1	-6.2831
Dync1li1	6	0.075413	0.22508	0.839315	5521	5	-6.3523	0.030145	0.049191	0.967782	1065	1	-6.3523
LOC103163658	6	0.10379	0.28932	0.887123	6726	2	-5.3842	0.030194	0.049228	0.967782	1066	1	-5.3842
Ntn4	6	0.24006	0.48838	1	10100	3	-6.0062	0.030291	0.049312	0.967782	1067	1	-6.0062
Znf512b	6	0.058647	0.18459	0.796911	4750	5	-5.8711	0.030339	0.049344	0.967782	1068	1	-5.8711
Btbd19	6	0.20319	0.43901	0.994019	9298	1	-5.0881	0.030388	0.049385	0.967782	1069	1	-5.0881
Znf48	5	0.94048	0.94744	1	19422	1	-6.3018	0.030424	0.042802	0.952995	1070	1	-6.3018
Ccl20	6	0.26906	0.52594	1	10657	4	-5.9	0.030437	0.049425	0.967782	1071	1	-5.9
LOC100767714	6	0.13211	0.33644	0.92666	7529	4	-5.5512	0.030485	0.049465	0.967782	1072	1	-5.5512
CTRLX13635	1	0.96947	0.96957	1	19987	0	0.48802	0.030527	0.030401	0.938362	1073	1	0.48802
Arhgap32	6	0.95287	0.9655	1	19639	1	-5.0842	0.030534	0.049499	0.967782	1074	1	-5.0842
Fzd4	6	0.2504	0.50178	1	10293	3	-5.834	0.030582	0.04954	0.967782	1075	1	-5.834
LOC103164265	6	0.40363	0.66129	1	13035	3	-5.9442	0.030728	0.049657	0.967782	1076	1	-5.9442
Lrrc34	6	0.71889	0.86735	1	16899	2	-5.6801	0.030777	0.049697	0.967782	1077	1	-5.6801
Ski	6	0.25695	0.51038	1	10417	3	-2.9616	0.030825	0.049732	0.967782	1078	1	-2.9616
Claudin-4	6	0.34023	0.61266	1	12177	3	-5.8374	0.030874	0.049777	0.967782	1079	1	-5.8374
LOC100759701	6	0.06933	0.21063	0.822989	5253	4	-6.1562	0.030922	0.049817	0.967782	1080	1	-6.1562
Klk11	6	0.092522	0.26438	0.868839	6271	5	-6.5	0.030971	0.049858	0.967782	1081	1	-6.5
Acsf3	6	0.27106	0.52841	1	10708	3	-5.6496	0.031019	0.049895	0.967782	1082	1	-5.6496
LOC100765625	6	0.016274	0.068969	0.601496	2377	5	-4.1332	0.031068	0.049929	0.967782	1083	1	-4.1332
Kif5a	6	0.094335	0.26843	0.873439	6340	4	-5.8809	0.031117	0.04997	0.967782	1084	1	-5.8809
Irf2	6	0.084959	0.24725	0.856934	5940	3	-4.7142	0.031165	0.050006	0.967782	1085	1	-4.7142
Itpa	6	0.0047509	0.022561	0.435761	1083	4	-5.8157	0.031262	0.050092	0.968442	1086	1	-5.8157
Fabp1	6	0.16634	0.38726	0.965271	8387	4	-5.7411	0.031311	0.050128	0.968442	1087	1	-5.7411
CTRLX18437	1	0.96861	0.9687	1	19967	0	0.37748	0.031391	0.031273	0.938362	1088	1	0.37748
Fabp12	4	0.29013	0.50574	1	11133	3	-5.978	0.031408	0.03837	0.952995	1089	1	-5.978
Cap2	6	0.21983	0.46148	1	9658	4	-5.5514	0.031456	0.050251	0.969099	1090	1	-5.5514
CTRLX01200	1	0.96854	0.96864	1	19965	0	0.30077	0.031457	0.031347	0.938362	1091	1	0.30077
Pxmp2	6	0.14873	0.36134	0.946372	7957	3	-6.1182	0.031553	0.050333	0.969277	1092	1	-6.1182
Bdnf	6	0.1984	0.43237	0.991266	9183	4	-5.7176	0.03165	0.050416	0.969277	1093	1	-5.7176
Entpd8	6	0.97914	0.97988	1	20267	1	-4.2474	0.031699	0.05046	0.969277	1094	1	-4.2474
Tmem204	6	0.14293	0.3528	0.941396	7798	4	-5.2673	0.031796	0.050547	0.969522	1095	1	-5.2673
Aven	5	0.98827	0.98825	1	20665	0	-5.4882	0.031841	0.044032	0.954829	1096	1	-5.4882
LOC100753836	6	0.87534	0.93987	1	18658	1	-5.57	0.031893	0.050627	0.969522	1097	1	-5.57
CTRLX02881	1	0.96804	0.96815	1	19957	0	0.37007	0.031964	0.031883	0.938362	1098	1	0.37007
CTRLX17944	1	0.96802	0.96813	1	19956	0	0.33291	0.031981	0.031897	0.938362	1099	1	0.33291
Papln	6	0.41006	0.666	1	13116	2	-5.794	0.032136	0.050831	0.969701	1100	1	-5.794
LOC107977509	3	0.99882	0.99883	1	21481	0	-1.0332	0.032137	0.035088	0.938362	1101	1	-1.0332
Echs1	6	0.07805	0.23119	0.845935	5637	4	-5.5573	0.032184	0.050872	0.969701	1102	1	-5.5573
Znf660	6	0.57109	0.78295	1	15235	2	-6.0774	0.032233	0.050917	0.969701	1103	1	-6.0774
LOC100754040	6	0.9804	0.98089	1	20311	1	-5.4252	0.032281	0.050957	0.969701	1104	1	-5.4252
Rgs20	6	0.035374	0.12388	0.717927	3549	4	-5.1295	0.03233	0.050992	0.969701	1105	1	-5.1295
LOC107980176	6	0.63427	0.8279	1	16076	2	-4.7936	0.032378	0.05103	0.969701	1106	1	-4.7936
Pfdn1	6	0.02383	0.091503	0.653832	2889	4	-5.7374	0.032427	0.051079	0.969701	1107	1	-5.7374
Tmem176b	6	0.32417	0.59379	1	11852	4	-4.6568	0.032524	0.051162	0.970114	1108	1	-4.6568
CTRLX09923	1	0.96745	0.96756	1	19937	0	0.42253	0.032554	0.032485	0.938362	1109	1	0.42253
LOC100757182	6	0.041364	0.14012	0.743463	3879	3	-6.0354	0.032621	0.051247	0.970114	1110	1	-6.0354
Tbc1d23	6	0.5062	0.73631	1	14406	3	-6.0478	0.032669	0.05129	0.970114	1111	1	-6.0478
Abca13	6	0.50404	0.73469	1	14379	1	-5.467	0.032718	0.051331	0.970114	1112	1	-5.467
Insrr	6	0.1976	0.43127	0.99069	9164	3	-5.9757	0.032766	0.051368	0.970114	1113	1	-5.9757
Micu1	6	0.98692	0.98696	1	20594	0	-5.9932	0.032815	0.051409	0.970114	1114	1	-5.9932
Zfp36l1	6	0.85188	0.92723	1	18344	2	-4.6656	0.032911	0.051496	0.970898	1115	1	-4.6656
Tifa	6	0.9663	0.97163	1	19909	1	-4.2651	0.033008	0.051578	0.971604	1116	1	-4.2651
Znf438	6	0.2841	0.54468	1	10994	1	-5.018	0.033154	0.051697	0.972075	1117	1	-5.018
Tm9sf2	5	0.9452	0.95031	1	19500	1	-5.0772	0.033176	0.045177	0.954864	1118	1	-5.0772
CTRLX04951	1	0.9668	0.96693	1	19920	0	0.1175	0.033202	0.033138	0.938362	1119	1	0.1175
Smim3	6	0.50001	0.73173	1	14336	2	-5.7998	0.033202	0.051739	0.972075	1120	1	-5.7998
LOC100755657	6	0.95625	0.96686	1	19707	1	-5.5906	0.033348	0.051853	0.972075	1121	1	-5.5906
Fgf8	6	0.38435	0.64701	1	12771	3	-5.7302	0.033396	0.051889	0.972075	1122	1	-5.7302
Myo9b	6	0.53299	0.75574	1	14735	3	-5.3003	0.033445	0.05193	0.972075	1123	1	-5.3003
Lipe	6	0.49166	0.72557	1	14215	2	-2.5293	0.033493	0.051969	0.972075	1124	1	-2.5293
LOC100754918	4	0.36431	0.57095	1	12515	2	-5.255	0.033516	0.040289	0.952995	1125	1	-5.255
Diras1	6	0.67888	0.85176	1	16563	2	-5.8613	0.03359	0.05205	0.972141	1126	1	-5.8613
CTRLX03816	1	0.96637	0.96653	1	19911	0	0.35427	0.033625	0.03355	0.938362	1127	1	0.35427
Mapk8	6	0.61018	0.81095	1	15765	2	-4.0586	0.033638	0.052096	0.972165	1128	1	-4.0586
LOC100759699	6	0.19194	0.42339	0.985998	9026	2	-4.5725	0.033735	0.052169	0.972703	1129	1	-4.5725
Ucn3	6	0.60372	0.80639	1	15693	2	-4.2036	0.033832	0.052249	0.97324	1130	1	-4.2036
Wdr45	6	0.074446	0.22277	0.836693	5481	4	-5.8684	0.033881	0.052292	0.97324	1131	1	-5.8684
Tmem233	6	0.50077	0.73228	1	14346	3	-4.4996	0.033929	0.052339	0.97324	1132	1	-4.4996
CTRLX09576	1	0.96606	0.96622	1	19905	0	0.39685	0.033941	0.033862	0.938362	1133	1	0.39685
Lypd5	6	0.47276	0.71181	1	13955	3	-4.9763	0.033977	0.052376	0.97324	1134	1	-4.9763
Atp12a	6	0.31384	0.58134	1	11645	4	-5.9681	0.034123	0.052513	0.973705	1135	1	-5.9681
Wnt5a	6	0.18328	0.41128	0.980007	8810	3	-6.0039	0.034171	0.052548	0.973705	1136	1	-6.0039
LOC103163056	6	0.45257	0.6972	1	13697	3	-5.6243	0.03422	0.052579	0.973705	1137	1	-5.6243
Olr1	6	0.57893	0.78858	1	15354	3	-4.7231	0.034268	0.052623	0.973705	1138	1	-4.7231
Rab33b	6	0.076534	0.22767	0.843598	5565	5	-5.7269	0.034413	0.052736	0.97418	1139	1	-5.7269
Cobl	6	0.28332	0.54371	1	10975	3	-5.9219	0.034462	0.05277	0.97418	1140	1	-5.9219
Fryl	6	0.023469	0.090478	0.651165	2866	4	-5.8385	0.034655	0.052933	0.97418	1141	1	-5.8385
Lamp3	5	0.98154	0.98165	1	20363	0	-6.0379	0.034671	0.046442	0.958426	1142	1	-6.0379
Lipn	6	0.30808	0.5744	1	11502	4	-4.9007	0.034752	0.053016	0.97418	1143	1	-4.9007
Disc1	6	0.037356	0.12931	0.723422	3667	4	-5.7078	0.0348	0.053052	0.97418	1144	1	-5.7078
Rab3gap1	6	0.39676	0.65619	1	12927	3	-4.795	0.034849	0.053098	0.97418	1145	1	-4.795
CTRLX05765	1	0.96511	0.96528	1	19886	0	0.33995	0.034888	0.034833	0.938362	1146	1	0.33995
Tfap2e	6	0.60266	0.80565	1	15685	2	-2.1973	0.034897	0.053139	0.97418	1147	1	-2.1973
Nxpe4	5	0.64433	0.79939	1	16200	1	-5.557	0.034914	0.046658	0.958665	1148	1	-5.557
Ubfd1	6	0.75059	0.88021	1	17182	2	-3.7169	0.034946	0.053173	0.97418	1149	1	-3.7169
Znf568	6	0.54544	0.76465	1	14896	2	-5.7535	0.034994	0.053216	0.97418	1150	1	-5.7535
CTRLX10614	1	0.96496	0.96512	1	19883	0	0.29204	0.035038	0.034981	0.938362	1151	1	0.29204
LOC100766443	6	0.58301	0.79153	1	15404	3	-5.667	0.035042	0.053253	0.97418	1152	1	-5.667
Vcam1	6	0.23873	0.48662	1	10073	3	-5.3828	0.035139	0.053343	0.97418	1153	1	-5.3828
Fyn	6	0.040497	0.1378	0.738093	3840	3	-5.8405	0.035188	0.053378	0.97418	1154	1	-5.8405
Rpl13	6	0.99997	0.99997	1	21869	0	-3.3642	0.035236	0.053423	0.97418	1155	1	-3.3642
Ctnna1	6	0.44504	0.69166	1	13578	3	-5.8521	0.035284	0.053459	0.97418	1156	1	-5.8521
LOC100772504	6	0.30957	0.57619	1	11545	4	-5.6577	0.035333	0.053508	0.97418	1157	1	-5.6577
LOC107977535	5	0.96764	0.96783	1	19944	1	-5.7353	0.035358	0.04704	0.961565	1158	1	-5.7353
Ankrd42	5	0.70513	0.83432	1	16775	2	-5.4442	0.035519	0.047176	0.961565	1159	1	-5.4442
LOC100771214	6	0.46022	0.70274	1	13795	2	-6.2349	0.035575	0.053696	0.97418	1160	1	-6.2349
Ldhd	6	0.0045244	0.021586	0.431361	1049	5	-6.0697	0.035623	0.053731	0.97418	1161	1	-6.0697
Astn1	6	0.1936	0.4257	0.987503	9063	4	-6.2535	0.035671	0.053775	0.97418	1162	1	-6.2535
Asgr2	6	0.67947	0.85198	1	16569	2	-3.1934	0.03572	0.053819	0.97418	1163	1	-3.1934
Ptpre	5	0.53255	0.73999	1	14726	2	-5.7942	0.035761	0.047397	0.961565	1164	1	-5.7942
Tmem223	6	0.61078	0.81141	1	15774	3	-3.217	0.035768	0.05385	0.97418	1165	1	-3.217
Onecut1	6	0.77063	0.88888	1	17389	1	-4.712	0.035816	0.053892	0.97418	1166	1	-4.712
LOC107977591	5	0.21269	0.4386	0.993822	9524	2	-6.2075	0.035842	0.047473	0.962104	1167	1	-6.2075
LOC100760924	6	0.051147	0.16565	0.777988	4370	4	-4.3543	0.035865	0.053939	0.97418	1168	1	-4.3543
Tgm3	6	0.056423	0.17905	0.791663	4636	4	-5.8732	0.035913	0.053971	0.97418	1169	1	-5.8732
Hypk	6	0.46722	0.7078	1	13891	1	-5.0808	0.036058	0.05409	0.97418	1170	1	-5.0808
Aacs	6	0.080897	0.23783	0.850895	5758	2	-1.5182	0.036106	0.054138	0.97418	1171	1	-1.5182
Ndufa12	6	0.60669	0.8085	1	15717	1	-5.6679	0.036203	0.054209	0.97418	1172	1	-5.6679
Mat2b	6	0.7054	0.86202	1	16779	2	-5.4892	0.036251	0.054241	0.97418	1173	1	-5.4892
Scarb1	6	0.0081129	0.037122	0.507338	1527	3	-5.7386	0.036348	0.05433	0.97418	1174	1	-5.7386
CTRLX18821	1	0.96359	0.96373	1	19857	0	0.26845	0.036409	0.036329	0.944123	1175	1	0.26845
Braf	6	0.47854	0.71608	1	14034	3	-5.4212	0.036445	0.054415	0.97418	1176	1	-5.4212
Tmem242	6	0.98632	0.98639	1	20564	0	-4.7214	0.036638	0.054584	0.97418	1177	1	-4.7214
Pacrg	6	0.19532	0.4281	0.988214	9109	3	-4.9476	0.036686	0.054623	0.97418	1178	1	-4.9476
Sv2b	5	0.42294	0.652	1	13288	1	-1.9377	0.036729	0.048249	0.967782	1179	1	-1.9377
Fezf2	6	0.039802	0.13593	0.735875	3797	3	-5.4809	0.036735	0.054666	0.97418	1180	1	-5.4809
LOC100772459	6	0.51072	0.73958	1	14471	3	-5.6028	0.036783	0.054721	0.97418	1181	1	-5.6028
Cdyl	6	0.13672	0.34348	0.93406	7645	3	-5.8763	0.036831	0.054763	0.97418	1182	1	-5.8763
CTRLX13643	1	0.96317	0.9633	1	19847	0	0.28759	0.036832	0.036738	0.949115	1183	1	0.28759
Kiaa1324	6	0.50294	0.73387	1	14367	2	-5.3087	0.03688	0.054803	0.97418	1184	1	-5.3087
CTRLX13940	1	0.96311	0.96324	1	19845	0	0.25122	0.03689	0.036798	0.949115	1185	1	0.25122
Mal2	6	0.97846	0.97936	1	20246	1	-5.3313	0.036928	0.054835	0.97418	1186	1	-5.3313
LOC100757773	6	0.86487	0.93412	1	18515	1	-2.6858	0.036976	0.05488	0.97418	1187	1	-2.6858
Foxo6	6	0.22213	0.46459	1	9698	4	-5.5421	0.037025	0.054934	0.97418	1188	1	-5.5421
Bcl11b	6	0.020184	0.080755	0.630705	2641	4	-5.1777	0.037121	0.055014	0.97418	1189	1	-5.1777
Plau	6	0.082669	0.24197	0.855004	5828	5	-5.434	0.037169	0.055046	0.97418	1190	1	-5.434
LOC100765032	6	0.21095	0.44958	0.998979	9485	4	-4.9972	0.037314	0.055172	0.97418	1191	1	-4.9972
Fhl5	6	0.05425	0.17354	0.78727	4520	4	-6.3706	0.037363	0.055218	0.97418	1192	1	-6.3706
Cdh1	6	0.043921	0.14687	0.75352	4008	5	-5.7105	0.037411	0.055259	0.97418	1193	1	-5.7105
Hsf4	6	0.99234	0.99238	1	20892	0	-5.9284	0.037459	0.055298	0.97418	1194	1	-5.9284
Lonrf1	6	0.013556	0.059054	0.576027	2117	4	-5.6588	0.037652	0.05546	0.97418	1195	1	-5.6588
Dlst	6	0.8895	0.94791	1	18889	2	-5.0641	0.037701	0.0555	0.97418	1196	1	-5.0641
LOC100755104	6	0.061985	0.19289	0.805366	4916	4	-5.907	0.037749	0.055546	0.97418	1197	1	-5.907
Efcab5	6	0.15494	0.37054	0.953463	8105	3	-3.5166	0.037797	0.055581	0.97418	1198	1	-3.5166
Dpp6	6	0.065222	0.20079	0.81263	5067	5	-5.6955	0.037894	0.055658	0.97418	1199	1	-5.6955
Ccdc112	6	0.25152	0.50325	1	10322	4	-5.1051	0.037942	0.055697	0.97418	1200	1	-5.1051
Wscd1	6	0.075167	0.22447	0.838608	5510	3	-5.9346	0.03799	0.055739	0.97418	1201	1	-5.9346
LOC100756750	4	0.38582	0.58632	1	12785	1	-2.9289	0.038043	0.044378	0.954864	1202	1	-2.9289
Ldlrap1	6	0.014065	0.061039	0.580396	2172	5	-5.3854	0.038135	0.055873	0.97418	1203	1	-5.3854
S100a11	6	0.017492	0.072657	0.607404	2477	2	-5.3371	0.038183	0.05591	0.97418	1204	1	-5.3371
Them4	5	0.058975	0.1722	0.786426	4764	3	-4.8197	0.03822	0.049504	0.967782	1205	1	-4.8197
Stk31	6	0.50791	0.73758	1	14429	3	-6.0316	0.038232	0.05595	0.97418	1206	1	-6.0316
CTRLX01281	1	0.96176	0.96192	1	19815	0	0.21186	0.038236	0.03815	0.952995	1207	1	0.21186
Wdr27	6	0.82496	0.91369	1	18014	2	-4.8777	0.03828	0.055996	0.97418	1208	1	-4.8777
Cnn3	5	0.97345	0.97351	1	20094	0	-3.1958	0.0383	0.049565	0.967782	1209	1	-3.1958
Ttl	6	0.27241	0.53007	1	10737	4	-5.728	0.038328	0.056034	0.97418	1210	1	-5.728
Ktn1	6	0.077699	0.23036	0.844775	5626	4	-5.8677	0.038376	0.056075	0.97418	1211	1	-5.8677
Trim36	6	0.60262	0.80562	1	15683	2	-6.1304	0.038425	0.056109	0.97418	1212	1	-6.1304
Bak1	6	0.74998	0.87996	1	17179	2	-4.6715	0.038473	0.056147	0.97418	1213	1	-4.6715
LOC103162003	6	0.35116	0.62231	1	12332	2	-5.6617	0.038521	0.056197	0.97418	1214	1	-5.6617
Sema6c	6	0.039728	0.13572	0.735875	3792	5	-5.4988	0.038569	0.05623	0.97418	1215	1	-5.4988
Trpc6	5	0.50164	0.72433	1	14355	1	-5.3552	0.038582	0.049798	0.967782	1216	1	-5.3552
Aak1	6	0.0038943	0.018749	0.413227	947	4	-5.6663	0.038618	0.056267	0.97418	1217	1	-5.6663
Ormdl2	6	0.30547	0.5712	1	11449	3	-5.6225	0.038666	0.0563	0.97418	1218	1	-5.6225
Aida	6	0.15095	0.36463	0.949366	8007	2	-6.3189	0.038714	0.05634	0.97418	1219	1	-6.3189
Cst11	6	0.83922	0.92075	1	18189	1	-3.7949	0.038762	0.056374	0.97418	1220	1	-3.7949
Aif1	5	0.041798	0.13455	0.734166	3899	2	-4.2647	0.038783	0.049977	0.967782	1221	1	-4.2647
Spag5	6	0.92331	0.95602	1	19218	1	-5.8622	0.03881	0.056414	0.97418	1222	1	-5.8622
Pfas	6	0.98853	0.9886	1	20684	0	-3.8914	0.038859	0.056463	0.97418	1223	1	-3.8914
Gfpt2	6	0.26204	0.51695	1	10515	3	-6.0427	0.038907	0.0565	0.97418	1224	1	-6.0427
Efcc1	6	0.022941	0.088914	0.647585	2831	3	-5.0231	0.038955	0.056541	0.97418	1225	1	-5.0231
CTRLX00376	1	0.96102	0.96117	1	19801	0	0.23771	0.038976	0.0389	0.952995	1226	1	0.23771
CTRLX09430	1	0.961	0.96114	1	19800	0	0.21207	0.039001	0.038921	0.952995	1227	1	0.21207
LOC100756295	6	0.033062	0.11761	0.706881	3420	4	-5.2398	0.039003	0.056583	0.97418	1228	1	-5.2398
LOC100764401	4	0.9354	0.93528	1	19349	1	-4.1413	0.039043	0.04525	0.954864	1229	1	-4.1413
Drd2	6	0.02258	0.087811	0.645609	2809	5	-5.6914	0.039052	0.056613	0.97418	1230	1	-5.6914
Ppargc1b	6	0.035042	0.12299	0.716411	3533	3	-5.5893	0.039148	0.056694	0.97418	1231	1	-5.5893
Lsm4	6	0.40463	0.66201	1	13043	3	-5.2423	0.039196	0.056739	0.97418	1232	1	-5.2423
LOC107979436	6	0.086388	0.2505	0.859047	5996	5	-5.5811	0.039244	0.056783	0.97418	1233	1	-5.5811
Abcc10	5	0.03826	0.12646	0.721117	3714	3	-6.4455	0.039266	0.050421	0.969277	1234	1	-6.4455
Adamts9	6	0.036341	0.12656	0.721298	3608	5	-6.3481	0.039293	0.056813	0.97418	1235	1	-6.3481
Stap1	6	0.046597	0.15384	0.761981	4147	3	-5.2097	0.039341	0.056849	0.97418	1236	1	-5.2097
LOC100765688	6	0.98246	0.98269	1	20391	1	-4.8636	0.039389	0.056893	0.97418	1237	1	-4.8636
Sdk1	6	0.84173	0.92199	1	18225	1	-4.9656	0.039437	0.056938	0.97418	1238	1	-4.9656
Fzd3	5	0.30506	0.53557	1	11442	3	-4.8299	0.039467	0.050589	0.969522	1239	1	-4.8299
Mad1l1	6	0.86875	0.93623	1	18563	2	-5.7482	0.039534	0.05702	0.97418	1240	1	-5.7482
LOC100765599	6	0.92482	0.95641	1	19234	1	-3.1124	0.039582	0.05706	0.97418	1241	1	-3.1124
Prrc2b	6	0.19446	0.42692	0.987941	9084	3	-2.8502	0.03963	0.057102	0.97418	1242	1	-2.8502
LOC100772782	5	0.96448	0.96486	1	19876	1	-4.2421	0.039709	0.050815	0.969701	1243	1	-4.2421
Il23r	6	0.30854	0.57497	1	11518	4	-5.17	0.039726	0.057184	0.97418	1244	1	-5.17
Pigr	6	0.06875	0.20924	0.82179	5226	4	-6.1265	0.039775	0.057223	0.97418	1245	1	-6.1265
Ube2c	6	0.083155	0.24309	0.855868	5851	5	-5.2838	0.039823	0.057267	0.97418	1246	1	-5.2838
Sec24a	5	0.021543	0.079535	0.626929	2729	3	-6.0931	0.039869	0.05095	0.969701	1247	1	-6.0931
LOC100771909	6	0.42751	0.67879	1	13342	3	-5.6215	0.039871	0.057306	0.97418	1248	1	-5.6215
Fzd6	6	0.23902	0.487	1	10083	3	-5.5123	0.040064	0.057476	0.97418	1249	1	-5.5123
Serpine3	6	0.57127	0.78308	1	15238	3	-5.4987	0.040112	0.057517	0.97418	1250	1	-5.4987
LOC100764471	6	0.80118	0.9024	1	17732	2	-4.9008	0.04016	0.057559	0.97418	1251	1	-4.9008
Dkk2	6	0.98307	0.98322	1	20414	1	-4.478	0.040208	0.057602	0.97418	1252	1	-4.478
Myo5c	6	0.35028	0.62166	1	12318	3	-5.1468	0.040256	0.057638	0.97418	1253	1	-5.1468
Srl	6	0.049156	0.16048	0.771015	4269	4	-5.5925	0.040305	0.057685	0.97418	1254	1	-5.5925
Ezr	6	0.0049387	0.023395	0.440424	1110	5	-5.5884	0.040353	0.057728	0.97418	1255	1	-5.5884
CTRLX07344	1	0.95961	0.95979	1	19776	0	0.14505	0.040388	0.040292	0.952995	1256	1	0.14505
LOC100772074	5	0.14532	0.33959	0.929865	7866	2	-5.2932	0.040392	0.051411	0.970114	1257	1	-5.2932
Stpg1	6	0.97229	0.97507	1	20072	1	-3.8417	0.040401	0.057774	0.97418	1258	1	-3.8417
Chrna3	6	0.66885	0.84803	1	16474	1	-5.6288	0.040449	0.057813	0.97418	1259	1	-5.6288
Ubxn11	6	0.69334	0.85733	1	16677	2	-6.2359	0.040545	0.057896	0.97418	1260	1	-6.2359
Zer1	6	0.25468	0.50744	1	10377	3	-5.7736	0.040642	0.057988	0.97418	1261	1	-5.7736
Plxna1	6	0.038525	0.13248	0.731833	3724	4	-4.7939	0.040738	0.058076	0.97418	1262	1	-4.7939
Sgsh	6	0.12602	0.32715	0.91984	7371	4	-5.6809	0.040786	0.058117	0.97418	1263	1	-5.6809
Shroom1	6	0.19478	0.42736	0.988214	9091	4	-5.8355	0.040834	0.058148	0.97418	1264	1	-5.8355
Ccdc27	6	0.27606	0.53468	1	10809	3	-4.4458	0.040882	0.058188	0.97418	1265	1	-4.4458
Lhx1	6	0.023944	0.091831	0.654685	2895	4	-5.7673	0.040931	0.058227	0.97418	1266	1	-5.7673
Ctnnb1	6	0.090031	0.25879	0.86545	6154	4	-5.8167	0.040979	0.058268	0.97418	1267	1	-5.8167
CTRLX06778	1	0.95898	0.95916	1	19757	0	0.17166	0.041019	0.040911	0.952995	1268	1	0.17166
Awat2	6	0.98919	0.98922	1	20718	0	-5.4373	0.041027	0.058308	0.97418	1269	1	-5.4373
LOC100767577	5	0.9985	0.99852	1	21422	0	-3.5162	0.041035	0.051973	0.972075	1270	1	-3.5162
Coq10a	5	0.31787	0.54866	1	11725	3	-6.3141	0.041075	0.052003	0.972075	1271	1	-6.3141
Rarb	6	0.0063216	0.029475	0.477617	1300	4	-5.6029	0.041123	0.058388	0.97418	1272	1	-5.6029
G3bp2	6	0.515	0.74274	1	14522	2	-5.7258	0.041219	0.058464	0.97418	1273	1	-5.7258
LOC100760660	6	0.93595	0.95958	1	19357	1	-5.4811	0.041267	0.058502	0.97418	1274	1	-5.4811
Cldn25	6	0.085377	0.24821	0.8578	5954	5	-5.7211	0.041316	0.058539	0.97418	1275	1	-5.7211
LOC100764100	6	0.55059	0.76831	1	14957	2	-4.0295	0.041364	0.05858	0.97418	1276	1	-4.0295
Ric3	6	0.029562	0.10784	0.687784	3233	3	-5.9851	0.041556	0.058737	0.97418	1277	1	-5.9851
Echdc2	6	0.50659	0.73658	1	14409	3	-5.2895	0.041604	0.058773	0.97418	1278	1	-5.2895
Adssl1	6	0.57547	0.78609	1	15299	2	-6.0865	0.041652	0.058801	0.97418	1279	1	-6.0865
Ptpn22	5	0.64714	0.80097	1	16233	1	-5.1077	0.041677	0.052518	0.973705	1280	1	-5.1077
Adra1d	6	0.093077	0.26564	0.86964	6299	5	-5.1459	0.041701	0.058846	0.97418	1281	1	-5.1459
Ift20	6	0.7163	0.86632	1	16873	2	-3.2276	0.041797	0.058931	0.97418	1282	1	-3.2276
Pigm	6	0.0021215	0.010593	0.352161	625	5	-5.7355	0.041845	0.058971	0.97418	1283	1	-5.7355
Edc4	6	0.18651	0.41586	0.982007	8892	4	-5.9363	0.041941	0.059047	0.97418	1284	1	-5.9363
Reep6	6	0.28723	0.54862	1	11067	3	-4.7227	0.041989	0.059093	0.97418	1285	1	-4.7227
Prpf38b	6	0.59196	0.79802	1	15526	2	-5.8805	0.042037	0.059134	0.97418	1286	1	-5.8805
Xkrx	6	0.79448	0.89941	1	17650	1	-5.2471	0.042085	0.059173	0.97418	1287	1	-5.2471
Dgkh	6	0.082905	0.24251	0.855868	5835	5	-5.9304	0.042133	0.059212	0.97418	1288	1	-5.9304
CTRLX11676	1	0.95769	0.95786	1	19741	0	0.15179	0.042307	0.042236	0.952995	1289	1	0.15179
LOC100755132	6	0.57645	0.78679	1	15316	2	-5.3307	0.042374	0.059413	0.97418	1290	1	-5.3307
LOC100752889	6	0.007089	0.032801	0.490203	1410	4	-6.2694	0.042422	0.05945	0.97418	1291	1	-6.2694
LOC100689008	6	0.52137	0.74731	1	14601	1	-5.7881	0.042518	0.059544	0.97418	1292	1	-5.7881
Gprc5b	6	0.015344	0.065952	0.591819	2300	4	-5.2154	0.042566	0.059583	0.97418	1293	1	-5.2154
Unc13a	6	0.11534	0.31067	0.902675	7112	2	-5.9356	0.042614	0.059617	0.97418	1294	1	-5.9356
Mon1b	6	0.56775	0.78056	1	15194	3	-6.1435	0.042662	0.059662	0.97418	1295	1	-6.1435
Dnajb14	6	0.2868	0.54811	1	11054	3	-5.8197	0.04271	0.059711	0.97418	1296	1	-5.8197
LOC100759623	5	0.99997	0.99998	1	21875	0	-2.9249	0.042801	0.053474	0.97418	1297	1	-2.9249
LOC100759848	6	0.022018	0.08619	0.641387	2771	2	-5.3416	0.042806	0.059778	0.97418	1298	1	-5.3416
Paqr6	6	0.87817	0.94144	1	18705	2	-5.6641	0.042903	0.059865	0.97418	1299	1	-5.6641
LOC100769256	4	0.26948	0.47911	1	10669	3	-5.6936	0.042907	0.048709	0.967782	1300	1	-5.6936
Irf4	6	0.13011	0.33341	0.925108	7481	4	-5.0993	0.042999	0.059944	0.97418	1301	1	-5.0993
Wfdc5	6	0.19236	0.42398	0.986362	9035	3	-5.9423	0.043047	0.059986	0.97418	1302	1	-5.9423
Acer1	6	0.47756	0.71536	1	14024	3	-5.0975	0.043095	0.060024	0.97418	1303	1	-5.0975
Plekho1	6	0.01427	0.061838	0.58402	2189	4	-6.5919	0.043143	0.060062	0.97418	1304	1	-6.5919
Ung	6	0.42696	0.67837	1	13333	3	-5.1998	0.043191	0.060104	0.97418	1305	1	-5.1998
Map2k1	6	0.29262	0.55541	1	11181	3	-6.4751	0.043383	0.06025	0.97418	1306	1	-6.4751
CTRLX15148	1	0.9566	0.95672	1	19718	0	0.071461	0.043404	0.043356	0.954367	1307	0	0.071461
Smyd2	6	0.4	0.65858	1	12972	3	-4.5031	0.043431	0.060291	0.97418	1308	1	-4.5031
LOC100768782	6	0.71011	0.86386	1	16819	2	-5.5672	0.043479	0.060333	0.97418	1309	1	-5.5672
Foxf1	6	0.30333	0.56857	1	11414	4	-5.7617	0.043527	0.060377	0.97418	1310	1	-5.7617
LOC100774594	6	0.50786	0.73753	1	14428	3	-5.3923	0.043575	0.060421	0.97418	1311	1	-5.3923
Neu2	6	0.14704	0.35885	0.944887	7910	4	-6.0308	0.043623	0.060453	0.97418	1312	1	-6.0308
Plp1	6	0.36134	0.62984	1	12468	2	-3.3672	0.043671	0.060496	0.97418	1313	1	-3.3672
LOC100763839	6	0.37136	0.63731	1	12608	2	-4.7858	0.043719	0.060529	0.97418	1314	1	-4.7858
LOC100750792	6	0.036652	0.1274	0.72209	3624	5	-4.7703	0.043767	0.060569	0.97418	1315	1	-4.7703
Bbs4	5	0.003915	0.016468	0.396806	949	4	-4.9425	0.043803	0.054362	0.97418	1316	1	-4.9425
Pcsk9	6	0.041165	0.1396	0.742693	3867	5	-6.2968	0.043815	0.0606	0.97418	1317	1	-6.2968
Ubald1	6	0.089262	0.25703	0.864973	6121	5	-5.86	0.043959	0.060711	0.97418	1318	1	-5.86
LOC100754252	6	0.046796	0.15435	0.762846	4155	3	-5.1491	0.044007	0.060746	0.97418	1319	1	-5.1491
Abcg4	6	0.21049	0.44894	0.998979	9469	4	-5.9357	0.044055	0.060786	0.97418	1320	1	-5.9357
LOC100763823	6	0.43245	0.68239	1	13400	3	-5.5903	0.044103	0.060825	0.97418	1321	1	-5.5903
LOC103162474	4	0.9999	0.9999	1	21801	0	-0.24281	0.044193	0.049861	0.967782	1322	1	-0.24281
Zbtb25	6	0.97632	0.97778	1	20190	1	-5.0139	0.044199	0.060904	0.97464	1323	1	-5.0139
Cfap53	6	0.16602	0.38678	0.965137	8378	3	-5.945	0.044295	0.060982	0.97464	1324	1	-5.945
Abcc12	6	0.029692	0.10821	0.688516	3239	3	-3.7502	0.044391	0.061066	0.97464	1325	1	-3.7502
CTRLX18610	1	0.95558	0.95567	1	19689	0	0.049971	0.044417	0.044379	0.954864	1326	0	0.049971
CTRL00367	1	0.95557	0.95566	1	19688	0	0.066745	0.044426	0.044385	0.954864	1327	0	0.066745
LOC107977071	6	0.93461	0.95917	1	19343	1	-5.3433	0.044439	0.06111	0.97464	1328	1	-5.3433
Alox15	6	0.69969	0.85977	1	16732	2	-5.7987	0.044487	0.061146	0.97464	1329	1	-5.7987
LOC103160736	5	0.51918	0.73317	1	14575	1	-4.8488	0.044525	0.054995	0.97418	1330	1	-4.8488
Dhrs9	6	0.31986	0.58866	1	11759	3	-4.8231	0.044535	0.061187	0.97464	1331	1	-4.8231
Dnttip1	5	0.98878	0.98881	1	20696	0	-6.3404	0.044565	0.05502	0.97418	1332	1	-6.3404
LOC100763591	6	0.46269	0.7045	1	13830	2	-4.0665	0.044583	0.061225	0.97464	1333	1	-4.0665
Slc5a7	6	0.5328	0.75559	1	14730	2	-5.243	0.044631	0.061266	0.97464	1334	1	-5.243
Grp	6	0.13976	0.34806	0.937863	7718	2	-4.3583	0.044679	0.061304	0.97464	1335	1	-4.3583
LOC100751452	6	0.0092109	0.041653	0.524063	1644	4	-5.2058	0.044775	0.061381	0.975154	1336	1	-5.2058
LOC100762217	6	0.85353	0.92811	1	18358	1	-4.802	0.044823	0.061427	0.975179	1337	1	-4.802
Plcxd2	6	0.0056509	0.026526	0.463619	1197	4	-5.8572	0.044919	0.0615	0.975441	1338	1	-5.8572
LOC100756685	6	0.77408	0.89034	1	17421	1	-4.4815	0.045015	0.06158	0.975441	1339	1	-4.4815
CTRLX09716	1	0.95497	0.95505	1	19683	0	0.031877	0.045032	0.045012	0.954864	1340	0	0.031877
LOC100752545	6	0.18237	0.41002	0.97954	8790	3	-4.6728	0.045063	0.061616	0.975441	1341	1	-4.6728
CTRLX17828	1	0.95492	0.95499	1	19682	0	0.025646	0.045082	0.045066	0.954864	1342	0	0.025646
Phkg2	6	0.95424	0.96604	1	19667	1	-5.241	0.045111	0.061661	0.975441	1343	1	-5.241
CTRLX01299	1	0.95479	0.95488	1	19677	0	0.026084	0.045206	0.045192	0.954864	1344	0	0.026084
Kcnj8	6	0.19092	0.42199	0.984796	9001	4	-5.8875	0.045255	0.061772	0.975875	1345	1	-5.8875
LOC100753820	5	0.94282	0.94883	1	19465	1	-5.1191	0.045285	0.055664	0.97418	1346	1	-5.1191
Plekhg6	6	0.10202	0.28547	0.885352	6651	3	-5.8233	0.045303	0.061809	0.975875	1347	1	-5.8233
Mgst3	6	0.37817	0.64242	1	12691	1	-5.4746	0.045351	0.061837	0.975875	1348	1	-5.4746
LOC107977583	6	0.43123	0.68151	1	13381	1	-4.5973	0.045399	0.061872	0.975875	1349	1	-4.5973
Rbms1	6	0.28946	0.55145	1	11111	4	-4.9526	0.045495	0.061945	0.976237	1350	1	-4.9526
LOC100754933	5	0.42716	0.65599	1	13336	1	-4.484	0.045525	0.055874	0.97418	1351	1	-4.484
Clrn1	6	0.8311	0.9167	1	18097	2	-5.6951	0.045543	0.061984	0.976237	1352	1	-5.6951
LOC100755294	5	0.47725	0.70264	1	14020	2	-5.3171	0.045565	0.055909	0.97418	1353	1	-5.3171
Wdr44	6	0.9853	0.98542	1	20505	0	-3.4533	0.045639	0.062061	0.976752	1354	1	-3.4533
Mxra7	6	0.34215	0.61487	1	12209	4	-5.4886	0.045735	0.062142	0.977316	1355	1	-5.4886
Fam227a	6	0.61455	0.81408	1	15832	3	-6.2204	0.04583	0.062222	0.977872	1356	1	-6.2204
Phlpp2	5	0.321	0.55173	1	11776	3	-6.2115	0.045846	0.056156	0.97418	1357	1	-6.2115
Sirt4	6	0.17021	0.39282	0.969368	8482	4	-5.9066	0.045926	0.062299	0.978309	1358	1	-5.9066
CTRLX16374	1	0.954	0.95411	1	19659	0	0.0055405	0.045996	0.045983	0.957881	1359	0	0.0055405
Csrnp1	6	0.078156	0.23144	0.845935	5642	4	-5.892	0.046022	0.062384	0.978309	1360	1	-5.892
CTRLX12757	1	0.95396	0.95406	1	19658	0	0.0061688	0.046037	0.046028	0.957881	1361	0	0.0061688
Trappc6b	6	0.41955	0.67299	1	13244	2	-5.7549	0.04607	0.06243	0.978339	1362	1	-5.7549
Rtn4rl2	6	0.02695	0.10041	0.674137	3071	5	-5.532	0.046166	0.062507	0.97885	1363	1	-5.532
Il20rb	6	0.24487	0.49462	1	10184	4	-5.6835	0.046262	0.062581	0.97931	1364	1	-5.6835
Rhno1	6	0.23086	0.47629	1	9903	3	-5.92	0.046405	0.0627	0.980265	1365	1	-5.92
Ctps2	6	0.95178	0.96508	1	19619	1	-5.5246	0.046453	0.062732	0.980265	1366	1	-5.5246
Mpg	6	0.58646	0.79406	1	15454	3	-5.3715	0.046549	0.062825	0.980956	1367	1	-5.3715
Zswim8	6	0.27634	0.53503	1	10816	3	-5.4878	0.046597	0.062866	0.980956	1368	1	-5.4878
LOC100764817	5	0.68992	0.82544	1	16652	1	-5.3714	0.046685	0.056873	0.97418	1369	1	-5.3714
Isg15	6	0.84962	0.92604	1	18317	2	-5.2586	0.046789	0.063016	0.982605	1370	1	-5.2586
Fam199x	5	0.31634	0.54714	1	11694	3	-4.7289	0.046805	0.056978	0.97418	1371	1	-4.7289
Sh3rf3	6	0.048813	0.15958	0.770184	4248	3	-6.1226	0.04698	0.063177	0.983432	1372	1	-6.1226
Bambi	6	0.031996	0.11463	0.702469	3362	5	-4.9713	0.047028	0.063222	0.983432	1373	1	-4.9713
Ptpra	6	0.91666	0.95436	1	19144	1	-4.2648	0.047076	0.063256	0.983432	1374	1	-4.2648
Usp21	5	0.1884	0.41219	0.980814	8938	3	-5.9433	0.047085	0.057221	0.97418	1375	1	-5.9433
Fam213a	6	0.081221	0.23859	0.850895	5779	3	-5.571	0.047124	0.063294	0.983432	1376	1	-5.571
Tex101	6	0.32112	0.59012	1	11778	3	-6.1427	0.04722	0.063365	0.983572	1377	1	-6.1427
LOC100762786	6	0.87357	0.93888	1	18632	2	-5.4872	0.047268	0.0634	0.983572	1378	1	-5.4872
Sytl1	6	0.39986	0.65848	1	12969	3	-4.5919	0.047315	0.063437	0.983572	1379	1	-4.5919
Tbr1	6	0.34935	0.62095	1	12295	2	-1.6086	0.047411	0.063514	0.984067	1380	1	-1.6086
Atad1	5	0.78362	0.88259	1	17516	1	-5.4682	0.047485	0.057584	0.97418	1381	1	-5.4682
Manf	6	0.60499	0.80729	1	15702	3	-3.6896	0.047507	0.063603	0.984089	1382	1	-3.6896
Ms4a5	5	0.78987	0.88664	1	17594	1	-4.1281	0.047684	0.057773	0.97418	1383	1	-4.1281
Fkbp11	6	0.023078	0.08931	0.64831	2844	4	-6.0284	0.047698	0.06375	0.984461	1384	1	-6.0284
LOC107976969	6	0.076207	0.22692	0.842617	5552	4	-6.3837	0.047746	0.063788	0.984461	1385	1	-6.3837
Rnf215	6	0.16679	0.38789	0.965271	8397	4	-5.927	0.047794	0.063836	0.984461	1386	1	-5.927
Prelid3a	6	0.020256	0.080964	0.631382	2645	5	-5.5701	0.047842	0.063881	0.984461	1387	1	-5.5701
Rbck1	6	0.21009	0.44839	0.998979	9457	4	-5.4811	0.048033	0.064043	0.984461	1388	1	-5.4811
Htr2b	6	0.033224	0.11804	0.706973	3432	5	-5.9621	0.048081	0.064087	0.984461	1389	1	-5.9621
Mov10	6	0.88986	0.94812	1	18892	2	-5.0384	0.048129	0.064127	0.984461	1390	1	-5.0384
Lrp2bp	6	0.83346	0.91789	1	18117	1	-3.9186	0.048177	0.064168	0.984461	1391	1	-3.9186
Eml6	6	0.83029	0.91629	1	18083	2	-5.1018	0.048225	0.064204	0.984461	1392	1	-5.1018
Hrc	5	0.084515	0.22528	0.839362	5916	3	-4.8614	0.048284	0.058299	0.97418	1393	1	-4.8614
Actn1	5	0.25188	0.48019	1	10330	3	-5.6819	0.048323	0.058347	0.97418	1394	1	-5.6819
LOC100752657	4	0.65194	0.78586	1	16299	1	-4.3667	0.048362	0.053588	0.97418	1395	1	-4.3667
Nudt7	6	0.96709	0.97205	1	19925	1	-4.1514	0.048368	0.064325	0.984461	1396	1	-4.1514
Ccdc14	6	0.61178	0.81212	1	15791	2	-4.4907	0.048416	0.064363	0.984461	1397	1	-4.4907
LOC107977752	4	0.34927	0.56018	1	12294	1	-2.8398	0.048426	0.053652	0.97418	1398	1	-2.8398
Tmem63a	5	0.02932	0.10436	0.679116	3221	2	-5.9598	0.048443	0.058442	0.97418	1399	1	-5.9598
Lhpp	6	0.22904	0.47391	1	9853	4	-5.7729	0.048464	0.0644	0.984461	1400	1	-5.7729
Psapl1	6	0.068671	0.20906	0.82179	5217	5	-6.1605	0.048512	0.064441	0.984461	1401	1	-6.1605
Appbp2	6	0.58096	0.79006	1	15377	2	-2.0924	0.048559	0.064484	0.984461	1402	1	-2.0924
Mtmr2	4	0.6216	0.76236	1	15920	2	-6.0449	0.048586	0.053785	0.97418	1403	1	-6.0449
Tp53tg5	6	0.82482	0.91362	1	18011	2	-6.2083	0.048607	0.064516	0.984461	1404	1	-6.2083
Sepsecs	6	0.58595	0.79369	1	15448	2	-4.6935	0.048655	0.064556	0.984461	1405	1	-4.6935
Adgrb3	6	0.73837	0.87511	1	17061	2	-5.4947	0.048703	0.064596	0.984461	1406	1	-5.4947
Slc25a22	6	0.031366	0.11289	0.697443	3335	3	-5.4139	0.048751	0.064636	0.984461	1407	1	-5.4139
R3hdm1	6	0.1448	0.35558	0.943103	7852	3	-4.8708	0.048799	0.064677	0.984461	1408	1	-4.8708
Ccin	6	0.034268	0.12089	0.7112	3494	3	-5.3651	0.048846	0.064709	0.984461	1409	1	-5.3651
Palm2	6	0.11377	0.30826	0.899607	7070	4	-4.1863	0.048894	0.064753	0.984461	1410	1	-4.1863
Map4k3	6	0.082618	0.24185	0.855004	5823	5	-5.9111	0.04899	0.06483	0.98452	1411	1	-5.9111
Sec16b	6	0.074191	0.22217	0.835661	5472	5	-5.7634	0.049133	0.064957	0.98452	1412	1	-5.7634
Rubcn	6	0.024001	0.092011	0.655017	2899	5	-3.8349	0.049181	0.064991	0.98452	1413	1	-3.8349
Fbxl6	6	0.35963	0.62855	1	12448	3	-5.5724	0.049229	0.065029	0.98452	1414	1	-5.5724
Pacsin1	6	0.042001	0.1418	0.746123	3914	5	-5.6311	0.049277	0.065065	0.98452	1415	1	-5.6311
Btbd10	5	0.89687	0.92675	1	18953	1	-4.6601	0.049281	0.059143	0.97418	1416	1	-4.6601
Hcfc1	6	0.99788	0.9979	1	21342	0	-3.641	0.049324	0.065101	0.98452	1417	1	-3.641
LOC107980128	6	0.24039	0.48881	1	10104	3	-6.135	0.049372	0.065139	0.98452	1418	1	-6.135
Mrpl4	6	0.99985	0.99985	1	21768	0	-5.26	0.04942	0.065178	0.98452	1419	1	-5.26
Ovgp1	6	0.02443	0.093218	0.656346	2928	3	-5.3602	0.049468	0.065217	0.98452	1420	1	-5.3602
LOC100750962	5	0.89517	0.92611	1	18936	1	-4.2811	0.04956	0.05937	0.97418	1421	1	-4.2811
Metrnl	6	0.12216	0.32121	0.914744	7267	3	-6.3139	0.049563	0.065298	0.98452	1422	1	-6.3139
Pkd1	6	0.19739	0.43097	0.990597	9159	3	-5.5797	0.049611	0.065332	0.98452	1423	1	-5.5797
Klhl6	6	0.049515	0.16139	0.771637	4290	3	-4.1551	0.049707	0.065418	0.98452	1424	1	-4.1551
Casp7	6	0.10188	0.28511	0.885167	6637	5	-5.563	0.049754	0.06546	0.98452	1425	1	-5.563
Plcl2	5	0.0039925	0.016775	0.400651	963	4	-3.7554	0.049879	0.059658	0.97418	1426	1	-3.7554
Fbxo31	6	0.67756	0.85126	1	16550	2	-3.2872	0.049898	0.065574	0.98452	1427	1	-3.2872
Ak4	6	0.32612	0.59613	1	11887	2	-2.482	0.049945	0.065613	0.98452	1428	1	-2.482
Syce1l	6	0.10092	0.28308	0.884156	6595	3	-5.9304	0.049993	0.06565	0.98452	1429	1	-5.9304
CTRLX01195	1	0.94989	0.95008	1	19592	0	-0.042253	0.050108	0.050183	0.968644	1430	0	-0.042253
Ranbp3	6	0.89111	0.94867	1	18905	1	-5.7446	0.050136	0.065757	0.98452	1431	1	-5.7446
Rpl15	6	0.9494	0.96417	1	19580	1	-4.5464	0.050184	0.065792	0.98452	1432	1	-4.5464
Itgb8	5	0.00039725	0.0018315	0.199621	210	4	-4.3364	0.050198	0.059939	0.97418	1433	1	-4.3364
LOC100763166	6	0.45055	0.69569	1	13668	2	-5.0173	0.050232	0.065835	0.98452	1434	1	-5.0173
Phospho2	5	0.51291	0.73005	1	14500	2	-5.1366	0.050278	0.060007	0.97418	1435	1	-5.1366
Trim28	6	0.70603	0.86227	1	16784	2	-4.4686	0.050327	0.065918	0.985078	1436	1	-4.4686
Adad2	6	0.30128	0.56606	1	11367	3	-3.1174	0.050423	0.066001	0.985614	1437	1	-3.1174
CTRLX17571	1	0.94956	0.94975	1	19586	0	-0.061367	0.05044	0.050481	0.969277	1438	0	-0.061367
Proser1	6	0.089932	0.25855	0.86545	6146	5	-5.3473	0.050471	0.066048	0.985614	1439	1	-5.3473
Tspan14	6	0.80177	0.90268	1	17742	2	-5.0434	0.050518	0.066088	0.985614	1440	1	-5.0434
LOC100765371	6	0.16207	0.38104	0.961299	8286	3	-5.6675	0.050662	0.06621	0.986748	1441	1	-5.6675
LOC100760262	5	0.99955	0.99954	1	21661	0	-1.3617	0.050876	0.060541	0.97418	1442	1	-1.3617
Fam221b	6	0.087007	0.25189	0.859278	6034	4	-5.6173	0.0509	0.066406	0.988894	1443	1	-5.6173
Serpinb13	6	0.085996	0.24961	0.858712	5987	3	-2.7783	0.050996	0.066495	0.988894	1444	1	-2.7783
CTRLX19741	1	0.94897	0.94914	1	19572	0	-0.077472	0.05103	0.051063	0.969701	1445	0	-0.077472
Aldh1l1	6	0.52067	0.74681	1	14595	1	-4.5281	0.051043	0.066541	0.988894	1446	1	-4.5281
Ppp2r1b	6	0.29391	0.557	1	11214	2	-4.6246	0.051091	0.066579	0.988894	1447	1	-4.6246
Fam19a1	5	0.09286	0.2419	0.855004	6287	1	-5.5817	0.051115	0.060762	0.97418	1448	1	-5.5817
Znf22	6	0.73354	0.87316	1	17020	2	-5.5972	0.051187	0.066672	0.989147	1449	1	-5.5972
LOC100771526	5	0.98071	0.9808	1	20325	0	-5.3173	0.051195	0.060831	0.97418	1450	1	-5.3173
Lmna	6	0.030194	0.10962	0.689905	3267	4	-5.5693	0.051234	0.066714	0.989147	1451	1	-5.5693
Hnrnpab	6	0.54228	0.76237	1	14860	3	-5.4269	0.051282	0.066751	0.989147	1452	1	-5.4269
Sdf4	6	0.069515	0.21107	0.823833	5258	5	-5.2485	0.05133	0.066793	0.989147	1453	1	-5.2485
Abcb6	6	0.35631	0.62608	1	12397	3	-3.3023	0.051377	0.066838	0.989147	1454	1	-3.3023
Sfxn2	6	0.851	0.92679	1	18334	1	-4.5822	0.051425	0.066881	0.989147	1455	1	-4.5822
Cth	6	0.18834	0.41838	0.983262	8937	3	-5.7977	0.051473	0.066912	0.989147	1456	1	-5.7977
Atp5g2	6	0.12012	0.31808	0.91088	7227	4	-5.8624	0.051568	0.066994	0.989385	1457	1	-5.8624
Fis1	6	0.020001	0.08024	0.629085	2632	5	-6.2706	0.051616	0.067046	0.989385	1458	1	-6.2706
Ankrd24	6	0.0019271	0.009678	0.341975	584	5	-4.2382	0.051664	0.067098	0.989385	1459	1	-4.2382
LOC100773839	6	0.52741	0.75168	1	14666	2	-5.2809	0.051711	0.067135	0.989385	1460	1	-5.2809
Flvcr1	6	0.039776	0.13585	0.735875	3795	3	-6.2504	0.051759	0.067174	0.989385	1461	1	-6.2504
Poc1b	6	0.30117	0.56593	1	11361	4	-6.6678	0.051807	0.067216	0.989385	1462	1	-6.6678
Itgb1bp1	6	0.0017457	0.008798	0.335213	545	3	-5.2477	0.051854	0.067262	0.989385	1463	1	-5.2477
CTRLX01762	1	0.94814	0.94831	1	19556	0	-0.092643	0.051861	0.051885	0.972075	1464	0	-0.092643
Chpf	6	0.10117	0.2836	0.884412	6609	4	-5.5531	0.051997	0.067393	0.990023	1465	1	-5.5531
Cplx2	6	0.0023499	0.011673	0.355671	685	4	-5.8148	0.052045	0.067423	0.990023	1466	1	-5.8148
LOC100768582	5	0.97481	0.97489	1	20139	0	-5.7133	0.05215	0.061666	0.975441	1467	1	-5.7133
Dlgap4	6	0.082969	0.24267	0.855868	5840	4	-6.3553	0.052236	0.067578	0.991628	1468	1	-6.3553
B4galt6	6	0.44076	0.6885	1	13512	2	-4.968	0.052426	0.06773	0.99167	1469	1	-4.968
Bicc1	6	0.80599	0.90463	1	17794	2	-6.0556	0.052522	0.067806	0.99167	1470	1	-6.0556
LOC100772658	6	0.29162	0.55416	1	11162	3	-5.6938	0.052569	0.067849	0.99167	1471	1	-5.6938
LOC100766209	6	0.18639	0.41569	0.981783	8891	4	-5.1008	0.052665	0.067923	0.99167	1472	1	-5.1008
Dido1	6	0.11765	0.31425	0.906588	7168	4	-4.0936	0.052712	0.067959	0.99167	1473	1	-4.0936
Crebzf	6	0.024392	0.093108	0.656346	2925	5	-6.1238	0.05276	0.067999	0.99167	1474	1	-6.1238
LOC107980300	6	0.81477	0.90879	1	17902	1	-5.9507	0.052808	0.068042	0.99167	1475	1	-5.9507
Elmod1	6	0.2618	0.51666	1	10510	2	-6.317	0.052855	0.068077	0.99167	1476	1	-6.317
Necab2	6	0.013055	0.05709	0.567293	2068	5	-5.7487	0.052903	0.06811	0.99167	1477	1	-5.7487
LOC100772772	5	0.96838	0.96853	1	19963	1	-5.6622	0.052946	0.062347	0.978309	1478	1	-5.6622
Mrpl32	6	0.99891	0.99892	1	21498	0	-5.8797	0.052951	0.068149	0.99167	1479	1	-5.8797
Ccl21	6	0.094197	0.26813	0.872961	6337	1	-5.9211	0.052998	0.068185	0.99167	1480	1	-5.9211
Tppp	6	0.20616	0.44302	0.995862	9368	3	-5.6753	0.053046	0.068229	0.99167	1481	1	-5.6753
Muc20	6	0.058178	0.18344	0.795926	4726	4	-5.3839	0.053093	0.068269	0.99167	1482	1	-5.3839
Hic1	6	0.21515	0.45529	1	9571	3	-6.6507	0.053141	0.068305	0.99167	1483	1	-6.6507
Npm2	6	0.39258	0.65318	1	12864	2	-5.6422	0.053284	0.06842	0.992679	1484	1	-5.6422
LOC100753143	6	0.20526	0.44181	0.995862	9343	4	-5.769	0.053379	0.068502	0.992768	1485	1	-5.769
Tmem91	6	0.64645	0.83651	1	16227	2	-4.3417	0.053474	0.06858	0.992768	1486	1	-4.3417
LOC107978598	4	0.095241	0.22905	0.843997	6376	2	-2.8695	0.053507	0.058297	0.97418	1487	1	-2.8695
Fam219b	6	0.9809	0.98131	1	20334	1	-5.4092	0.053522	0.068613	0.992768	1488	1	-5.4092
Dedd2	6	0.33764	0.60965	1	12130	4	-5.6619	0.05357	0.068651	0.992768	1489	1	-5.6619
Mbp	6	0.015301	0.065792	0.591708	2292	4	-5.7348	0.053665	0.068726	0.992768	1490	1	-5.7348
Csf3	6	0.98379	0.9839	1	20448	1	-5.591	0.05376	0.068805	0.992768	1491	1	-5.591
LOC100750627	6	0.42803	0.67918	1	13350	2	-5.7846	0.053808	0.06885	0.992768	1492	1	-5.7846
Trabd2b	6	0.40672	0.66351	1	13072	3	-4.471	0.053855	0.068881	0.992768	1493	1	-4.471
Nlrp2	5	0.08189	0.22002	0.833449	5804	3	-3.7711	0.05394	0.06326	0.983432	1494	1	-3.7711
Arhgef1	6	0.17814	0.40405	0.974987	8703	3	-5.1279	0.053998	0.069007	0.992768	1495	1	-5.1279
LOC100769262	4	0.99239	0.99239	1	20896	0	-4.5561	0.05408	0.058822	0.97418	1496	1	-4.5561
LOC100758976	6	0.63734	0.83006	1	16118	3	-3.8996	0.054141	0.069134	0.993415	1497	1	-3.8996
Ebf4	6	0.11942	0.31699	0.910173	7207	3	-4.9918	0.054236	0.069203	0.993415	1498	1	-4.9918
Pde3a	6	0.05851	0.18425	0.795926	4747	3	-4.7277	0.054331	0.069275	0.993415	1499	1	-4.7277
LOC100756005	5	0.96943	0.96953	1	19986	0	-5.2198	0.054337	0.063606	0.984089	1500	1	-5.2198
Dao	6	0.39367	0.65397	1	12883	2	-5.6418	0.054569	0.069464	0.993415	1501	1	-5.6418
Efcab6	6	0.011811	0.052176	0.556507	1933	4	-4.0243	0.054617	0.069507	0.993415	1502	1	-4.0243
Col10a1	6	0.039747	0.13577	0.735875	3793	5	-4.8829	0.054664	0.069545	0.993415	1503	1	-4.8829
Dpf2	6	0.39866	0.65761	1	12953	2	-5.7875	0.054712	0.069594	0.993415	1504	1	-5.7875
Hps3	6	0.039762	0.13581	0.735875	3794	5	-5.8989	0.054807	0.069675	0.993415	1505	1	-5.8989
Polr3c	6	0.99997	0.99998	1	21883	0	-4.7093	0.054854	0.069717	0.993415	1506	1	-4.7093
LOC100767270	6	0.080601	0.23714	0.850034	5747	5	-5.6912	0.054902	0.069761	0.993415	1507	1	-5.6912
LOC100750595	4	0.97717	0.97729	1	20211	0	-2.5668	0.054909	0.059542	0.97418	1508	1	-2.5668
Psmb6	6	0.97098	0.97427	1	20037	1	-5.0783	0.054949	0.069798	0.993415	1509	1	-5.0783
Adra2a	6	0.045069	0.14986	0.757527	4066	4	-6.0284	0.054997	0.069853	0.993415	1510	1	-6.0284
LOC100763061	6	0.42003	0.67333	1	13253	3	-5.9907	0.055045	0.069894	0.993415	1511	1	-5.9907
LOC100772170	5	0.57402	0.76139	1	15277	1	-3.4206	0.055091	0.064277	0.984461	1512	1	-3.4206
Sh2b2	6	0.5297	0.75337	1	14692	3	-6.2701	0.055092	0.069937	0.993415	1513	1	-6.2701
Mettl11b	5	0.93561	0.94467	1	19353	1	-5.6792	0.05521	0.06438	0.984461	1514	1	-5.6792
CTRLX13192	1	0.94478	0.94496	1	19488	0	-0.10981	0.055217	0.05519	0.97418	1515	0	-0.10981
LOC100760064	4	0.37806	0.58079	1	12688	2	-6.2655	0.055227	0.059842	0.97418	1516	1	-6.2655
Slc15a1	6	0.16987	0.39232	0.969107	8472	3	-5.8236	0.055235	0.070065	0.993415	1517	1	-5.8236
LOC100761725	6	0.057846	0.18261	0.795408	4705	4	-6.4456	0.055282	0.070105	0.993415	1518	1	-6.4456
LOC100756575	6	0.0044492	0.021254	0.429943	1037	5	-5.124	0.05533	0.070149	0.993415	1519	1	-5.124
Slc35b1	6	0.2767	0.53549	1	10828	3	-4.29	0.055377	0.070189	0.993415	1520	1	-4.29
Crbn	6	0.4495	0.69493	1	13645	3	-5.5783	0.055425	0.070234	0.993415	1521	1	-5.5783
Hras	6	0.13014	0.33345	0.925108	7482	4	-5.8437	0.055472	0.070272	0.993415	1522	1	-5.8437
Anapc7	6	0.054474	0.17412	0.78727	4534	5	-5.2558	0.05552	0.070311	0.993415	1523	1	-5.2558
Theg	6	0.029065	0.10644	0.682926	3205	4	-6.3526	0.055568	0.070355	0.993415	1524	1	-6.3526
Porcn	6	0.23911	0.48711	1	10084	4	-5.7824	0.055615	0.070394	0.993415	1525	1	-5.7824
Rassf9	6	0.19743	0.43103	0.990597	9160	3	-5.6691	0.055663	0.070432	0.993415	1526	1	-5.6691
Lyzl4	6	0.31489	0.58263	1	11671	2	-5.4995	0.05571	0.070466	0.993415	1527	1	-5.4995
Slc6a4	6	0.19284	0.42464	0.986842	9046	4	-6.275	0.055805	0.07054	0.993814	1528	1	-6.275
Ssna1	6	0.22567	0.46937	1	9778	4	-5.1393	0.055948	0.070661	0.994881	1529	1	-5.1393
CTRLX01603	1	0.94405	0.94422	1	19479	0	-0.14491	0.055948	0.055903	0.97418	1530	0	-0.14491
Itpr2	6	0.32895	0.59951	1	11953	2	-5.4889	0.056043	0.070742	0.995142	1531	1	-5.4889
Iqcf6	6	0.034653	0.12193	0.71379	3515	3	-3.1094	0.05609	0.070775	0.995142	1532	1	-3.1094
Tacr1	6	0.078123	0.23136	0.845935	5640	5	-5.9826	0.056138	0.070818	0.995142	1533	1	-5.9826
LOC100763914	6	0.98937	0.98942	1	20736	0	-5.1279	0.056185	0.070861	0.995142	1534	1	-5.1279
Dhrs7c	6	0.63852	0.8309	1	16137	2	-5.0639	0.05628	0.070931	0.995417	1535	1	-5.0639
Ldb3	6	0.001628	0.008211	0.325881	523	5	-6.0694	0.056328	0.070972	0.995417	1536	1	-6.0694
Il12rb2	5	0.27086	0.50018	1	10700	2	-5.5412	0.056361	0.065397	0.98452	1537	1	-5.5412
Bri3bp	6	0.98155	0.98188	1	20364	1	-5.323	0.056375	0.071017	0.995417	1538	1	-5.323
LOC103160509	5	0.71026	0.83736	1	16821	2	-4.8295	0.05644	0.065466	0.98452	1539	1	-4.8295
LOC100757836	5	0.004469	0.018694	0.413227	1040	3	-6.0961	0.05648	0.065506	0.98452	1540	1	-6.0961
Plekhh3	6	0.073786	0.22121	0.834617	5449	2	-6.2461	0.056565	0.07117	0.996891	1541	1	-6.2461
Snx1	6	0.10489	0.29177	0.888667	6776	4	-5.0846	0.056613	0.071213	0.996891	1542	1	-5.0846
LOC100762892	4	0.52178	0.68618	1	14604	2	-2.9261	0.056691	0.06119	0.97464	1543	1	-2.9261
Gab3	5	0.77415	0.87649	1	17422	1	-4.7967	0.056718	0.065726	0.98452	1544	1	-4.7967
Smdt1	6	0.27246	0.53013	1	10739	4	-4.946	0.056755	0.071326	0.997504	1545	1	-4.946
Hipk2	5	0.11047	0.27593	0.879276	6990	3	-3.9865	0.056757	0.065754	0.98452	1546	1	-3.9865
Mylk	6	0.015673	0.067192	0.596179	2328	4	-5.0928	0.056803	0.071367	0.997504	1547	1	-5.0928
Gng5	6	0.0048323	0.022929	0.437944	1097	5	-5.4637	0.056897	0.071439	0.997504	1548	1	-5.4637
Mrpl12	6	0.99938	0.9994	1	21606	0	-6.0942	0.056992	0.071521	0.997936	1549	1	-6.0942
Msi2	6	0.015022	0.064767	0.591708	2263	4	-5.7426	0.05704	0.071561	0.997936	1550	1	-5.7426
Slc13a1	6	0.33334	0.6046	1	12034	3	-5.7858	0.057182	0.071682	0.99877	1551	1	-5.7858
Flt1	6	0.17354	0.39753	0.972106	8569	4	-4.2805	0.05723	0.07172	0.99877	1552	1	-4.2805
CTRLX14993	1	0.94268	0.94286	1	19460	0	-1.3321	0.057323	0.057283	0.97418	1553	0	-1.3321
Tmem141	6	0.528	0.7521	1	14674	3	-5.4719	0.057325	0.071812	0.998828	1554	1	-5.4719
LOC100760560	6	0.59303	0.79877	1	15548	3	-6.1986	0.057372	0.071853	0.998828	1555	1	-6.1986
LOC100762660	6	0.12439	0.3246	0.917542	7324	4	-4.1879	0.057467	0.071923	0.999037	1556	1	-4.1879
Testin-2	6	0.44966	0.69504	1	13650	3	-5.6373	0.057514	0.071962	0.999037	1557	1	-5.6373
Vstm2b	6	0.26939	0.52632	1	10665	3	-5.807	0.057562	0.072005	0.999037	1558	1	-5.807
Suv39h2	5	0.68542	0.82279	1	16613	1	-4.5638	0.05759	0.066471	0.988894	1559	1	-4.5638
LOC103164262	6	0.55623	0.77233	1	15045	3	-5.3417	0.057609	0.072057	0.999126	1560	1	-5.3417
LOC100767490	6	0.5424	0.76246	1	14862	3	-5.5439	0.057752	0.072173	0.999999	1561	1	-5.5439
Ptrhd1	6	0.078386	0.23198	0.845935	5657	4	-6.2161	0.057894	0.072306	0.999999	1562	1	-6.2161
LOC103158572	6	0.75288	0.88119	1	17214	1	-5.5968	0.058036	0.072437	0.999999	1563	1	-5.5968
Tbc1d30	6	0.12263	0.3219	0.914943	7279	3	-5.7807	0.058084	0.072477	0.999999	1564	1	-5.7807
Rnf31	6	0.16865	0.39053	0.967619	8442	4	-5.9266	0.058131	0.072513	0.999999	1565	1	-5.9266
Agtr1	6	0.17442	0.3988	0.973034	8589	4	-5.9801	0.058178	0.072552	0.999999	1566	1	-5.9801
Ttc38	6	0.26094	0.51557	1	10495	2	-5.2637	0.058226	0.072585	0.999999	1567	1	-5.2637
Astl	6	0.087784	0.25364	0.860003	6069	3	-5.4021	0.058368	0.072703	0.999999	1568	1	-5.4021
LOC100759980	1	0.94161	0.94179	1	19436	0	-0.4098	0.058391	0.058368	0.97418	1569	0	-0.4098
Six2	6	0.21541	0.45565	1	9578	3	-3.4003	0.058416	0.07274	0.999999	1570	1	-3.4003
LOC100771812	5	0.67552	0.8171	1	16533	2	-3.5978	0.05854	0.06729	0.989385	1571	1	-3.5978
LOC100767606	6	0.14988	0.36305	0.947773	7984	4	-5.9347	0.058558	0.072858	0.999999	1572	1	-5.9347
Pcdhac1	6	0.95712	0.96724	1	19728	1	-1.711	0.058605	0.072904	0.999999	1573	1	-1.711
Thnsl2	6	0.022388	0.087257	0.643973	2795	5	-5.6482	0.058653	0.072942	0.999999	1574	1	-5.6482
Fbxw8	6	0.89732	0.94996	1	18956	1	-3.327	0.0587	0.072981	0.999999	1575	1	-3.327
Pdgfa	6	0.31878	0.58735	1	11745	4	-5.6417	0.058747	0.073024	0.999999	1576	1	-5.6417
LOC103158998	6	0.99045	0.99047	1	20784	0	-5.7036	0.058795	0.07307	0.999999	1577	1	-5.7036
LOC100772276	6	0.2419	0.49073	1	10132	4	-5.3029	0.05889	0.073152	0.999999	1578	1	-5.3029
Cep170	6	0.041893	0.14151	0.745585	3906	4	-4.3736	0.058937	0.073193	0.999999	1579	1	-4.3736
CTRLX02037	1	0.941	0.94119	1	19429	0	-0.16136	0.058997	0.058976	0.97418	1580	0	-0.16136
LOC100774112	6	0.185	0.41373	0.981293	8854	3	-5.9093	0.059032	0.073266	0.999999	1581	1	-5.9093
Hgsnat	6	0.6367	0.82961	1	16107	2	-5.297	0.059126	0.073356	0.999999	1582	1	-5.297
Phyh	6	0.74147	0.87639	1	17088	2	-4.9731	0.059221	0.073434	0.999999	1583	1	-4.9731
LOC100764469	6	0.86986	0.93685	1	18578	2	-5.5183	0.059269	0.073472	0.999999	1584	1	-5.5183
Lhfpl2	6	0.45164	0.6965	1	13685	3	-5.3468	0.059316	0.073519	0.999999	1585	1	-5.3468
Cdh18	5	0.18112	0.40084	0.973034	8765	1	-1.1944	0.059331	0.067979	0.99167	1586	1	-1.1944
Lep	6	0.59618	0.80105	1	15587	2	-5.5095	0.059411	0.073608	0.999999	1587	1	-5.5095
Hopx	6	0.51549	0.74309	1	14527	2	-4.6342	0.059458	0.073647	0.999999	1588	1	-4.6342
LOC100754300	6	0.74079	0.87612	1	17080	1	-5.5008	0.059505	0.073687	0.999999	1589	1	-5.5008
CTRLX18470	1	0.94048	0.94067	1	19423	0	-0.13278	0.059521	0.059507	0.97418	1590	0	-0.13278
Baiap3	6	0.050925	0.16505	0.777221	4360	3	-5.3488	0.059647	0.073802	0.999999	1591	1	-5.3488
Man1a1	6	0.47521	0.71365	1	13988	3	-5.7053	0.059695	0.073844	0.999999	1592	1	-5.7053
Abcb7	6	0.13107	0.33489	0.926514	7500	3	-5.5808	0.059742	0.073884	0.999999	1593	1	-5.5808
LOC103158641	4	0.98763	0.98766	1	20636	0	-4.7392	0.059773	0.063875	0.984461	1594	1	-4.7392
Rab15	6	0.00037379	0.0019756	0.208611	204	4	-5.6152	0.05979	0.073925	0.999999	1595	1	-5.6152
Lrrc73	6	0.21619	0.45667	1	9590	3	-5.9826	0.059837	0.073969	0.999999	1596	1	-5.9826
LOC100761248	6	0.0058381	0.027345	0.468167	1225	5	-5.8324	0.059884	0.074009	0.999999	1597	1	-5.8324
Sun2	6	0.040509	0.13783	0.738093	3842	2	-5.5118	0.059979	0.074082	0.999999	1598	1	-5.5118
Depdc1b	6	0.23335	0.47954	1	9955	3	-4.4139	0.060121	0.074196	0.999999	1599	1	-4.4139
Becn2	5	0.045932	0.14379	0.747683	4114	3	-5.6158	0.060122	0.068704	0.992768	1600	1	-5.6158
Slain2	6	0.28946	0.55146	1	11112	3	-5.4252	0.060168	0.074245	0.999999	1601	1	-5.4252
LOC100763983	6	0.54055	0.76111	1	14835	2	-5.7853	0.060216	0.074287	0.999999	1602	1	-5.7853
Rnf168	6	0.23773	0.48534	1	10049	4	-6.4512	0.060263	0.074328	0.999999	1603	1	-6.4512
Pla2g4e	6	0.53888	0.7599	1	14820	2	-5.1474	0.06031	0.074374	0.999999	1604	1	-5.1474
C5ar1	6	0.19098	0.42207	0.984796	9003	3	-5.2186	0.060358	0.074415	0.999999	1605	1	-5.2186
Krt8	6	0.12541	0.3262	0.918679	7356	4	-5.7627	0.060405	0.074457	0.999999	1606	1	-5.7627
LOC100770238	4	0.95429	0.95413	1	19670	0	-3.7919	0.060407	0.064457	0.984461	1607	1	-3.7919
Spz1	5	0.8266	0.90507	1	18033	1	-5.984	0.060438	0.068977	0.992768	1608	1	-5.984
Nlrp14	5	0.84749	0.91059	1	18289	1	-3.2001	0.060478	0.069015	0.992768	1609	1	-3.2001
Arf6	6	0.70797	0.86304	1	16803	2	-6.5346	0.060547	0.074588	0.999999	1610	1	-6.5346
Tmub1	6	0.13536	0.34137	0.931556	7610	4	-5.8581	0.060594	0.074623	0.999999	1611	1	-5.8581
Ap1g1	6	0.51999	0.74633	1	14588	2	-5.103	0.060642	0.074671	0.999999	1612	1	-5.103
Rdh14	6	0.11584	0.31144	0.903687	7121	4	-5.8447	0.060689	0.074706	0.999999	1613	1	-5.8447
Epn1	6	0.084348	0.24582	0.856804	5902	5	-5.8424	0.060831	0.074832	0.999999	1614	1	-5.8424
LOC100765383	5	0.010321	0.040808	0.521076	1779	2	-4.1617	0.060873	0.069353	0.993415	1615	1	-4.1617
Ctps1	6	0.36657	0.63377	1	12544	2	-5.252	0.060878	0.07488	0.999999	1616	1	-5.252
Gigyf2	6	0.0052729	0.024841	0.454033	1146	5	-6.1953	0.060973	0.074957	0.999999	1617	1	-6.1953
Litaf	6	0.95585	0.96669	1	19697	1	-5.4425	0.061162	0.075115	0.999999	1618	1	-5.4425
Cdc42ep3	6	0.79347	0.89894	1	17633	2	-5.3066	0.061256	0.075194	0.999999	1619	1	-5.3066
Nrip2	6	0.35119	0.62233	1	12334	3	-5.0552	0.061304	0.075237	0.999999	1620	1	-5.0552
LOC100765573	5	0.44869	0.67622	1	13632	3	-5.7265	0.061307	0.069761	0.993415	1621	1	-5.7265
Pdzrn4	6	0.29174	0.55431	1	11164	4	-5.1264	0.061398	0.075313	0.999999	1622	1	-5.1264
Evx2	6	0.1716	0.39478	0.96993	8520	4	-5.4935	0.061446	0.075359	0.999999	1623	1	-5.4935
Apoe	6	0.013207	0.057686	0.569273	2085	5	-5.7512	0.06154	0.075443	0.999999	1624	1	-5.7512
Rpe65	5	0.30709	0.53764	1	11480	1	-5.1746	0.061584	0.070006	0.993415	1625	1	-5.1746
LOC103162296	6	0.33323	0.60447	1	12032	2	-4.2786	0.061587	0.075484	0.999999	1626	1	-4.2786
Taar1	6	0.9711	0.97434	1	20042	1	-6.4599	0.061635	0.075523	0.999999	1627	1	-6.4599
Mmp8	6	0.097987	0.27663	0.879957	6487	4	-5.5433	0.061682	0.075568	0.999999	1628	1	-5.5433
Hsd11b2	6	0.40187	0.65998	1	13003	3	-2.8248	0.061729	0.07561	0.999999	1629	1	-2.8248
Osgepl1	6	0.63035	0.82514	1	16026	1	-5.4975	0.061776	0.075649	0.999999	1630	1	-5.4975
LOC100750453	5	0.97462	0.97469	1	20132	0	-5.5335	0.06186	0.070255	0.993415	1631	1	-5.5335
Plp2	6	0.0016251	0.0081943	0.325807	522	3	-5.1299	0.061871	0.075729	0.999999	1632	1	-5.1299
Septin-12	6	0.46548	0.70656	1	13872	3	-4.7649	0.061918	0.075769	0.999999	1633	1	-4.7649
Nceh1	6	0.56753	0.78041	1	15187	1	-5.4896	0.061966	0.075809	0.999999	1634	1	-5.4896
Kcnh7	6	0.3967	0.65615	1	12925	2	-5.4719	0.06206	0.075886	0.999999	1635	1	-5.4719
Tpmt	5	0.79612	0.89072	1	17670	1	-3.8609	0.062097	0.070454	0.993415	1636	1	-3.8609
Hells	6	0.4993	0.7312	1	14321	2	-5.703	0.062107	0.075929	0.999999	1637	1	-5.703
Ghdc	6	0.0024763	0.01228	0.361399	711	5	-5.7818	0.062155	0.075969	0.999999	1638	1	-5.7818
Rab3a	6	0.003193	0.015607	0.387221	842	4	-6.6013	0.062202	0.076005	0.999999	1639	1	-6.6013
Il11	6	0.81226	0.90762	1	17879	1	-5.4742	0.062344	0.076138	0.999999	1640	1	-5.4742
Fabp4	6	0.045782	0.15172	0.759489	4103	2	-5.8312	0.062391	0.076177	0.999999	1641	1	-5.8312
Nit1	6	0.69223	0.8569	1	16669	2	-5.3871	0.062438	0.076222	0.999999	1642	1	-5.3871
LOC100770729	6	0.10966	0.30187	0.894192	6970	4	-5.0757	0.062485	0.076257	0.999999	1643	1	-5.0757
Prdm11	6	0.030406	0.11022	0.692413	3273	3	-5.3925	0.062533	0.076297	0.999999	1644	1	-5.3925
Erbin	6	0.52398	0.7492	1	14627	3	-4.8603	0.06258	0.076333	0.999999	1645	1	-4.8603
Il17ra	6	0.26563	0.52152	1	10583	2	-5.2767	0.062627	0.07637	0.999999	1646	1	-5.2767
Brwd1	6	0.62101	0.81865	1	15913	3	-5.4568	0.062674	0.076408	0.999999	1647	1	-5.4568
Inpp1	6	0.32303	0.59241	1	11824	4	-6.0975	0.062816	0.076524	0.999999	1648	1	-6.0975
Abtb2	6	0.13219	0.33654	0.92666	7531	4	-3.991	0.062863	0.076563	0.999999	1649	1	-3.991
Dspp	6	0.0018678	0.0093887	0.339419	573	4	-4.6546	0.06291	0.076606	0.999999	1650	1	-4.6546
LOC107977719	6	0.88215	0.94368	1	18770	1	-6.3805	0.062958	0.076643	0.999999	1651	1	-6.3805
Aar2	6	0.15232	0.36666	0.951484	8040	4	-5.8206	0.063005	0.07668	0.999999	1652	1	-5.8206
Chrm5	6	0.38522	0.64766	1	12781	2	-6.1706	0.063052	0.076709	0.999999	1653	1	-6.1706
LOC100752122	6	0.040836	0.13872	0.739811	3859	5	-5.8724	0.063146	0.0768	0.999999	1654	1	-5.8724
Ice2	5	0.98141	0.98152	1	20355	0	-5.3031	0.063201	0.071413	0.997504	1655	1	-5.3031
Qdpr	6	0.00051644	0.0026942	0.227968	254	4	-4.7362	0.063288	0.076934	0.999999	1656	1	-4.7362
Ankzf1	6	0.28006	0.53968	1	10893	3	-6.1165	0.063335	0.076973	0.999999	1657	1	-6.1165
Calml5	6	0.32701	0.5972	1	11907	4	-5.3782	0.063382	0.077017	0.999999	1658	1	-5.3782
LOC100755699	6	0.27087	0.52815	1	10701	1	-4.7461	0.06343	0.07706	0.999999	1659	1	-4.7461
Lnx1	6	0.083681	0.24428	0.856532	5874	3	-5.1292	0.063524	0.077127	0.999999	1660	1	-5.1292
Fam71f1	6	0.19938	0.43374	0.991692	9209	3	-5.2957	0.063571	0.077168	0.999999	1661	1	-5.2957
LOC100765963	5	0.17895	0.3972	0.971743	8719	4	-4.7326	0.063596	0.071758	0.99877	1662	1	-4.7326
Vsig4	6	0.095767	0.27166	0.874725	6409	5	-5.173	0.063618	0.077211	0.999999	1663	1	-5.173
Cfap157	6	0.038681	0.1329	0.733138	3730	4	-5.7702	0.063713	0.07729	0.999999	1664	1	-5.7702
Il1rap	6	0.12291	0.32234	0.915817	7285	2	-5.0396	0.06376	0.077334	0.999999	1665	1	-5.0396
LOC100759389	6	0.036976	0.12827	0.722522	3640	5	-6.3382	0.063807	0.07738	0.999999	1666	1	-6.3382
Gnb3	6	0.30724	0.57339	1	11487	3	-5.989	0.063854	0.077426	0.999999	1667	1	-5.989
Il17rd	6	0.28215	0.54225	1	10946	4	-5.7026	0.063996	0.077538	0.999999	1668	1	-5.7026
Smim24	6	0.12097	0.31936	0.912111	7241	4	-5.7344	0.064279	0.077776	0.999999	1669	1	-5.7344
Ctrl	6	0.56087	0.7756	1	15103	2	-5.1936	0.064326	0.077814	0.999999	1670	1	-5.1936
Acp7	6	0.030994	0.11189	0.695472	3314	4	-4.5236	0.06442	0.077886	0.999999	1671	1	-4.5236
Kcnc3	6	0.27026	0.5274	1	10684	4	-6.0059	0.064467	0.077921	0.999999	1672	1	-6.0059
LOC100772787	6	0.13252	0.33706	0.927093	7543	2	-5.5839	0.064515	0.077972	0.999999	1673	1	-5.5839
Nol11	6	0.99887	0.99886	1	21489	0	-4.4636	0.064562	0.07801	0.999999	1674	1	-4.4636
Cdc42ep1	6	0.25462	0.50735	1	10375	3	-4.9277	0.064609	0.078044	0.999999	1675	1	-4.9277
Arhgap35	6	0.87709	0.94085	1	18686	2	-4.6548	0.064656	0.078095	0.999999	1676	1	-4.6548
Znf423	6	0.74944	0.87973	1	17173	2	-5.573	0.06475	0.078169	0.999999	1677	1	-5.573
LOC100773668	6	0.0045523	0.021701	0.432043	1052	3	-5.8607	0.064798	0.078208	0.999999	1678	1	-5.8607
Ntpcr	6	0.23586	0.48287	1	10007	4	-5.1258	0.064892	0.078287	0.999999	1679	1	-5.1258
Bdkrb2	6	0.29026	0.55244	1	11137	2	-5.3307	0.064939	0.078334	0.999999	1680	1	-5.3307
Pnldc1	6	0.9613	0.96911	1	19807	1	-5.6366	0.064986	0.078368	0.999999	1681	1	-5.6366
Acvr1	6	0.16908	0.39117	0.968402	8452	4	-5.5603	0.065033	0.078401	0.999999	1682	1	-5.5603
Atp6ap1l	6	0.11407	0.30876	0.900236	7081	3	-5.4786	0.06508	0.078439	0.999999	1683	1	-5.4786
LOC100773725	6	0.65184	0.84027	1	16297	3	-6.1718	0.065127	0.078478	0.999999	1684	1	-6.1718
LOC100770451	6	0.92063	0.95536	1	19183	1	-5.4578	0.065175	0.07852	0.999999	1685	1	-5.4578
Epb41	6	0.10379	0.28932	0.887123	6727	3	-5.6966	0.065222	0.078565	0.999999	1686	1	-5.6966
Trip10	6	0.011195	0.049751	0.553028	1859	5	-5.6922	0.065269	0.078609	0.999999	1687	1	-5.6922
Reps2	6	0.20601	0.44282	0.995862	9362	4	-5.5648	0.065316	0.078645	0.999999	1688	1	-5.5648
LOC100757320	6	0.18024	0.407	0.977585	8749	4	-5.2984	0.065363	0.07869	0.999999	1689	1	-5.2984
Ift52	6	0.82328	0.91285	1	17992	1	-5.3226	0.06541	0.078725	0.999999	1690	1	-5.3226
Arl2	6	0.99868	0.99869	1	21455	0	-6.0327	0.065457	0.07876	0.999999	1691	1	-6.0327
Plxna4	6	0.13183	0.33602	0.9266	7524	4	-4.0409	0.065504	0.078802	0.999999	1692	1	-4.0409
Adcy2	6	0.018967	0.077097	0.620987	2564	5	-6.277	0.065599	0.078884	0.999999	1693	1	-6.277
Gabrr3	5	0.98662	0.98661	1	20579	0	-5.8526	0.065643	0.073536	0.999999	1694	1	-5.8526
LOC100756412	6	0.23268	0.47868	1	9937	2	-6.0196	0.065693	0.078965	0.999999	1695	1	-6.0196
Cd151	6	0.97286	0.97542	1	20080	1	-5.3675	0.065787	0.079041	0.999999	1696	1	-5.3675
Il6st	4	0.66003	0.7921	1	16386	1	-3.1752	0.065787	0.069459	0.993415	1697	1	-3.1752
Gpr156	6	0.049413	0.16112	0.771637	4282	5	-5.1984	0.065834	0.079081	0.999999	1698	1	-5.1984
Dnaja4	6	0.06596	0.20253	0.814466	5101	5	-5.6261	0.065928	0.079162	0.999999	1699	1	-5.6261
Pla1a	6	0.62167	0.81909	1	15921	3	-4.7429	0.065975	0.079204	0.999999	1700	1	-4.7429
Ccdc9	6	0.022042	0.086258	0.64168	2773	4	-3.951	0.066117	0.079319	0.999999	1701	1	-3.951
LOC103164553	6	0.59289	0.79867	1	15543	2	-6.045	0.066164	0.079365	0.999999	1702	1	-6.045
Ankrd7	6	0.10384	0.28943	0.887123	6729	2	-4.0316	0.066211	0.079406	0.999999	1703	1	-4.0316
Atxn1l	6	0.48066	0.71759	1	14067	3	-6.2139	0.066258	0.079448	0.999999	1704	1	-6.2139
Nmrk2	6	0.42651	0.67806	1	13328	3	-6.0512	0.066305	0.07949	0.999999	1705	1	-6.0512
Hp1bp3	6	0.095298	0.27064	0.874407	6381	3	-5.3023	0.066352	0.079523	0.999999	1706	1	-5.3023
Syt7	6	0.63586	0.82903	1	16099	2	-5.3188	0.066399	0.079566	0.999999	1707	1	-5.3188
Mybl2	6	0.64447	0.83511	1	16204	3	-6.0796	0.066446	0.079604	0.999999	1708	1	-6.0796
LOC100765921	6	0.22242	0.46501	1	9705	4	-4.8345	0.066493	0.079644	0.999999	1709	1	-4.8345
Rsad1	6	0.0079242	0.036334	0.505496	1505	5	-3.8606	0.06654	0.079687	0.999999	1710	1	-3.8606
Ubqln2	6	0.036017	0.12566	0.720491	3588	4	-5.5755	0.066587	0.079721	0.999999	1711	1	-5.5755
LOC100773113	6	0.25719	0.51068	1	10421	4	-6.1768	0.066634	0.079761	0.999999	1712	1	-6.1768
LOC100750593	6	0.80395	0.90368	1	17764	2	-4.1429	0.066682	0.079801	0.999999	1713	1	-4.1429
LOC100762832	6	0.0009378	0.0048669	0.280403	368	4	-5.5667	0.066729	0.079839	0.999999	1714	1	-5.5667
H6pd	6	0.28758	0.54909	1	11072	3	-5.1723	0.066776	0.079881	0.999999	1715	1	-5.1723
Hoxd3	6	0.26751	0.52393	1	10622	3	-4.5955	0.066823	0.079915	0.999999	1716	1	-4.5955
LOC100773492	6	0.27095	0.52827	1	10705	3	-5.7121	0.06687	0.079953	0.999999	1717	1	-5.7121
Dnpep	6	0.019799	0.079624	0.626929	2622	5	-6.0605	0.066917	0.079995	0.999999	1718	1	-6.0605
LOC100753541	6	0.0065369	0.030411	0.48104	1330	3	-6.3231	0.067011	0.080075	0.999999	1719	1	-6.3231
Znf652	6	0.21527	0.45545	1	9576	4	-6.0229	0.067058	0.080112	0.999999	1720	1	-6.0229
LOC100772164	6	0.83593	0.91913	1	18147	1	-5.3979	0.067199	0.080231	0.999999	1721	1	-5.3979
Ncmap	5	0.97765	0.97774	1	20229	0	-3.4029	0.067216	0.074961	0.999999	1722	1	-3.4029
LOC103162172	6	0.035575	0.12442	0.718729	3561	2	-6.6417	0.067293	0.080312	0.999999	1723	1	-6.6417
Mast3	6	0.19892	0.4331	0.991266	9195	3	-5.5184	0.067434	0.080447	0.999999	1724	1	-5.5184
Ctsz	6	0.4379	0.68634	1	13466	3	-5.3737	0.067481	0.080484	0.999999	1725	1	-5.3737
Slc17a7	6	0.35746	0.62692	1	12413	3	-5.5635	0.067528	0.080522	0.999999	1726	1	-5.5635
Kcng2	6	0.4376	0.68612	1	13460	3	-5.537	0.067575	0.080563	0.999999	1727	1	-5.537
Tmem2	6	0.062552	0.1943	0.807727	4937	4	-6.2754	0.067622	0.080602	0.999999	1728	1	-6.2754
CTRLX17971	1	0.93228	0.93242	1	19314	0	-2.0312	0.067716	0.067738	0.99167	1729	0	-2.0312
Elfn1	6	0.072221	0.21752	0.831076	5384	3	-6.1756	0.067763	0.08072	0.999999	1730	1	-6.1756
LOC100767998	5	0.62604	0.78936	1	15964	2	-5.9445	0.067805	0.075467	0.999999	1731	1	-5.9445
Ppfibp1	6	0.95339	0.96572	1	19648	1	-5.8029	0.067857	0.080802	0.999999	1732	1	-5.8029
Setd2	6	0.84043	0.92136	1	18208	2	-6.4813	0.067904	0.080839	0.999999	1733	1	-6.4813
Tpgs1	6	0.033657	0.11924	0.707324	3466	5	-5.459	0.067951	0.08088	0.999999	1734	1	-5.459
Bbs7	6	0.056897	0.18024	0.792591	4661	2	-4.3983	0.067998	0.080914	0.999999	1735	1	-4.3983
Heph	6	0.27987	0.53946	1	10888	2	-5.7849	0.068045	0.080961	0.999999	1736	1	-5.7849
Pak1	6	0.28003	0.53964	1	10892	3	-6.4824	0.068139	0.081043	0.999999	1737	1	-6.4824
LOC100773591	5	0.4564	0.68336	1	13755	1	-5.8375	0.068198	0.075823	0.999999	1738	1	-5.8375
LOC100768553	6	0.88647	0.94614	1	18835	1	-5.7062	0.068233	0.081124	0.999999	1739	1	-5.7062
Stx16	6	0.12439	0.3246	0.917542	7325	4	-5.1453	0.06828	0.08117	0.999999	1740	1	-5.1453
Tcn2	6	0.27242	0.53009	1	10738	4	-6.1079	0.068327	0.08121	0.999999	1741	1	-6.1079
LOC107979952	6	0.21864	0.45991	1	9634	4	-5.63	0.068468	0.081322	0.999999	1742	1	-5.63
Cdk13	6	0.070427	0.21326	0.826129	5298	5	-5.7896	0.068515	0.081361	0.999999	1743	1	-5.7896
Mdp1	6	0.65278	0.84094	1	16308	2	-5.9703	0.06875	0.081563	0.999999	1744	1	-5.9703
Sh2d3c	5	0.26592	0.49502	1	10587	3	-6.0022	0.068786	0.07637	0.999999	1745	1	-6.0022
Esyt1	6	0.093649	0.26688	0.871344	6321	5	-6.4198	0.068797	0.081595	0.999999	1746	1	-6.4198
Olfm1	6	0.21733	0.45817	1	9610	2	-4.8986	0.068844	0.081639	0.999999	1747	1	-4.8986
Flnc	6	0.35794	0.62726	1	12419	3	-5.034	0.068891	0.081679	0.999999	1748	1	-5.034
Mtmr1	5	0.079249	0.21455	0.827959	5704	2	-4.2261	0.068904	0.076475	0.999999	1749	1	-4.2261
CTRLX09134	1	0.93108	0.93121	1	19301	0	-0.24038	0.068917	0.068911	0.992768	1750	0	-0.24038
LOC100754363	6	0.033414	0.11857	0.707025	3446	5	-4.9285	0.069032	0.081801	0.999999	1751	1	-4.9285
Trpm7	6	0.060316	0.18874	0.801665	4831	5	-5.8115	0.06922	0.081973	0.999999	1752	1	-5.8115
LOC100772973	5	0.551	0.74947	1	14967	1	-4.5548	0.069257	0.076782	0.999999	1753	1	-4.5548
Tekt2	6	0.81547	0.90914	1	17912	2	-3.2209	0.069267	0.082012	0.999999	1754	1	-3.2209
Lig1	6	0.11973	0.31748	0.910265	7218	3	-5.5614	0.069314	0.082052	0.999999	1755	1	-5.5614
LOC107977672	6	0.46055	0.70298	1	13797	2	-3.8939	0.069361	0.082088	0.999999	1756	1	-3.8939
Ntn5	6	0.078431	0.23209	0.845935	5659	5	-6.2752	0.069502	0.082207	0.999999	1757	1	-6.2752
Qki	6	0.99852	0.99853	1	21426	0	-5.3304	0.069549	0.08225	0.999999	1758	1	-5.3304
LOC100756006	6	0.085441	0.24836	0.8578	5958	4	-4.434	0.069595	0.082296	0.999999	1759	1	-4.434
LOC100770989	6	0.53717	0.75869	1	14797	2	-4.9218	0.069642	0.08233	0.999999	1760	1	-4.9218
Rbfox1	6	0.0060373	0.028233	0.472586	1256	4	-6.1097	0.069689	0.082369	0.999999	1761	1	-6.1097
Zmat4	6	0.651	0.83968	1	16285	3	-4.7297	0.069736	0.082408	0.999999	1762	1	-4.7297
Tlcd1	6	0.99939	0.99941	1	21608	0	-4.8915	0.069783	0.082447	0.999999	1763	1	-4.8915
Ntrk2	6	0.27605	0.53467	1	10808	4	-5.2626	0.069877	0.082529	0.999999	1764	1	-5.2626
Odc1	6	0.63489	0.82834	1	16086	2	-5.0279	0.069924	0.082565	0.999999	1765	1	-5.0279
LOC103160866	4	0.42686	0.61613	1	13331	2	-4.9796	0.069948	0.073321	0.999999	1766	1	-4.9796
Npc1	6	0.98985	0.9899	1	20758	0	-6.9942	0.069971	0.0826	0.999999	1767	1	-6.9942
Psd4	6	0.069967	0.21213	0.824817	5276	4	-5.9829	0.070112	0.082726	0.999999	1768	1	-5.9829
LOC100760619	6	0.71943	0.86754	1	16907	2	-4.3484	0.070159	0.082766	0.999999	1769	1	-4.3484
Pus7l	6	0.038135	0.13143	0.728534	3705	2	-6.1334	0.070299	0.082884	0.999999	1770	1	-6.1334
Ankdd1a	6	0.0065702	0.030561	0.48104	1334	4	-5.5359	0.070346	0.082924	0.999999	1771	1	-5.5359
Gjb2	6	0.32638	0.59645	1	11893	4	-5.9376	0.070393	0.082972	0.999999	1772	1	-5.9376
Btnl2	6	0.0056141	0.026355	0.463127	1190	5	-5.4488	0.07044	0.083017	0.999999	1773	1	-5.4488
Tpd52l3	6	0.18925	0.41965	0.984004	8959	4	-5.5776	0.070487	0.08306	0.999999	1774	1	-5.5776
Vip	5	0.31434	0.54509	1	11658	2	-5.7057	0.070511	0.077874	0.999999	1775	1	-5.7057
Chrnb3	6	0.98574	0.98585	1	20529	0	-1.8657	0.070534	0.083098	0.999999	1776	1	-1.8657
Ushbp1	6	0.52754	0.75179	1	14668	3	-4.5965	0.070628	0.08318	0.999999	1777	1	-4.5965
LOC100766630	5	0.94524	0.95034	1	19501	1	-5.1885	0.070629	0.077963	0.999999	1778	1	-5.1885
Rin2	6	0.22938	0.47433	1	9862	3	-5.4186	0.070675	0.083224	0.999999	1779	1	-5.4186
Cobll1	6	0.72315	0.86899	1	16939	2	-4.8706	0.070721	0.083271	0.999999	1780	1	-4.8706
Zdhhc14	6	0.19654	0.42979	0.98936	9144	3	-6.0647	0.070862	0.083398	0.999999	1781	1	-6.0647
Stap2	6	0.12241	0.32156	0.914766	7274	4	-4.8445	0.070909	0.083436	0.999999	1782	1	-4.8445
Katnal1	6	0.17597	0.40099	0.973034	8636	3	-5.0731	0.070956	0.083478	0.999999	1783	1	-5.0731
Traf1	6	0.10739	0.29719	0.892166	6875	5	-5.5839	0.071003	0.083523	0.999999	1784	1	-5.5839
LOC100753218	6	0.043697	0.14629	0.753509	3990	4	-6.5407	0.07105	0.083556	0.999999	1785	1	-6.5407
Rai14	6	0.15436	0.36967	0.953184	8092	4	-6.2132	0.071096	0.083601	0.999999	1786	1	-6.2132
Ehhadh	6	0.53707	0.75862	1	14796	3	-3.7745	0.07119	0.083675	0.999999	1787	1	-3.7745
Irf9	6	0.10662	0.29552	0.891776	6841	4	-5.8671	0.071237	0.083716	0.999999	1788	1	-5.8671
Epb41l4a	6	0.55789	0.77353	1	15062	3	-5.5241	0.071284	0.08375	0.999999	1789	1	-5.5241
Chst10	6	0.93988	0.96084	1	19413	1	-5.3312	0.071331	0.083784	0.999999	1790	1	-5.3312
Slc2a3	6	0.22684	0.47096	1	9801	2	-4.5068	0.071378	0.083821	0.999999	1791	1	-4.5068
Mta2	6	0.077314	0.22949	0.843997	5608	4	-5.8788	0.071471	0.083903	0.999999	1792	1	-5.8788
Rab44	6	0.020778	0.082496	0.633568	2685	3	-2.6751	0.071518	0.083937	0.999999	1793	1	-2.6751
LOC100751617	6	0.14305	0.35297	0.941396	7802	4	-5.7837	0.071565	0.083981	0.999999	1794	1	-5.7837
LOC100765926	6	0.090196	0.25914	0.86545	6163	3	-6.1401	0.071612	0.084021	0.999999	1795	1	-6.1401
Smtnl1	6	0.37999	0.64376	1	12714	3	-5.5174	0.071846	0.084227	0.999999	1796	1	-5.5174
LOC103162167	6	0.22496	0.46843	1	9762	3	-4.8608	0.071893	0.084269	0.999999	1797	1	-4.8608
LOC100768939	6	0.32642	0.5965	1	11894	4	-6.3163	0.07194	0.084313	0.999999	1798	1	-6.3163
Cldn7	6	0.0032875	0.016023	0.389606	856	5	-5.5799	0.072034	0.084399	0.999999	1799	1	-5.5799
Golt1b	6	0.062047	0.19304	0.805707	4917	2	-4.0392	0.072221	0.084557	0.999999	1800	1	-4.0392
Hmha1	6	0.24726	0.49773	1	10226	4	-5.3091	0.072268	0.084596	0.999999	1801	1	-5.3091
Trim47	6	0.025617	0.096607	0.664926	2994	1	-5.328	0.072315	0.084629	0.999999	1802	1	-5.328
LOC103164371	6	0.79891	0.90141	1	17713	1	-5.5496	0.072361	0.084665	0.999999	1803	1	-5.5496
Loxl1	6	0.073843	0.22134	0.834617	5454	5	-5.7809	0.072455	0.084742	0.999999	1804	1	-5.7809
Ky	6	0.40498	0.66224	1	13047	3	-5.2399	0.072502	0.084786	0.999999	1805	1	-5.2399
Gramd2	6	0.18281	0.41063	0.9798	8801	4	-5.3108	0.072689	0.084937	0.999999	1806	1	-5.3108
Trim42	6	0.1141	0.3088	0.900236	7082	4	-5.8647	0.072736	0.084976	0.999999	1807	1	-5.8647
Cldnd2	6	0.97556	0.97725	1	20169	1	-1.4018	0.072783	0.085009	0.999999	1808	1	-1.4018
Wdr37	6	0.62552	0.8218	1	15962	2	-5.4414	0.07283	0.085052	0.999999	1809	1	-5.4414
LOC100757467	6	0.8715	0.93773	1	18603	2	-5.8758	0.072876	0.085093	0.999999	1810	1	-5.8758
LOC100773576	6	0.57494	0.78571	1	15290	2	-6.0493	0.072923	0.085125	0.999999	1811	1	-6.0493
Sobp	6	0.29571	0.55919	1	11251	3	-5.9305	0.07297	0.08517	0.999999	1812	1	-5.9305
Hnrnpul1	6	0.23207	0.47789	1	9923	3	-4.2283	0.073017	0.085209	0.999999	1813	1	-4.2283
Olfm2	6	0.34123	0.61379	1	12191	4	-5.9816	0.073063	0.085251	0.999999	1814	1	-5.9816
Otof	6	0.98059	0.98106	1	20322	1	-4.7563	0.073157	0.085337	0.999999	1815	1	-4.7563
Ypel5	6	0.87102	0.93748	1	18593	1	-5.9496	0.073204	0.08538	0.999999	1816	1	-5.9496
Syt17	6	0.29716	0.56093	1	11281	4	-5.6051	0.073251	0.085412	0.999999	1817	1	-5.6051
Pax8	6	0.0086667	0.039407	0.518206	1577	3	-5.5199	0.073297	0.085445	0.999999	1818	1	-5.5199
Bbs1	6	0.75378	0.88157	1	17222	1	-3.0441	0.073344	0.085483	0.999999	1819	1	-3.0441
Kctd21	6	0.63282	0.82686	1	16058	3	-4.918	0.073391	0.085515	0.999999	1820	1	-4.918
Tmc4	6	0.43974	0.68776	1	13498	3	-5.7348	0.073485	0.085593	0.999999	1821	1	-5.7348
Odf3l1	6	0.43458	0.68394	1	13424	3	-5.3564	0.073531	0.085636	0.999999	1822	1	-5.3564
Rhoq	5	0.19482	0.41917	0.983413	9093	3	-5.5951	0.073563	0.080637	0.999999	1823	1	-5.5951
Mcur1	6	0.99796	0.99797	1	21358	0	-4.9979	0.073578	0.085676	0.999999	1824	1	-4.9979
Dnase1l3	6	0.3323	0.60342	1	12010	4	-3.9678	0.073672	0.085748	0.999999	1825	1	-3.9678
Snrnp27	6	0.049908	0.16239	0.773335	4310	4	-4.2843	0.073859	0.085904	0.999999	1826	1	-4.2843
Prr14l	6	0.62974	0.82472	1	16016	3	-4.7562	0.073952	0.085989	0.999999	1827	1	-4.7562
Isyna1	6	0.063854	0.19749	0.811156	4988	2	-6.4432	0.073999	0.086036	0.999999	1828	1	-6.4432
Srr	5	0.77772	0.87878	1	17462	1	-4.0775	0.074032	0.08105	0.999999	1829	1	-4.0775
Txndc5	6	0.34548	0.61802	1	12251	3	-5.0075	0.074092	0.086117	0.999999	1830	1	-5.0075
Ntm	5	0.10705	0.2694	0.874407	6852	3	-5.9031	0.07411	0.081118	0.999999	1831	1	-5.9031
LOC103161573	6	0.059478	0.18665	0.800847	4783	4	-4.9639	0.074186	0.086198	0.999999	1832	1	-4.9639
Herc4	5	0.20504	0.43033	0.989985	9336	3	-5.8278	0.074227	0.081228	0.999999	1833	1	-5.8278
LOC100760082	6	0.262	0.5169	1	10513	3	-5.6478	0.074233	0.086243	0.999999	1834	1	-5.6478
LOC107980387	6	0.1557	0.37165	0.953463	8129	3	-5.471	0.074279	0.086282	0.999999	1835	1	-5.471
LOC100770100	5	0.9752	0.97527	1	20153	0	-4.8982	0.074306	0.081295	0.999999	1836	1	-4.8982
Nit2	6	0.2287	0.47344	1	9845	2	-5.9447	0.074373	0.086367	0.999999	1837	1	-5.9447
LOC100769844	6	0.51999	0.74634	1	14589	3	-5.7458	0.07442	0.086407	0.999999	1838	1	-5.7458
Kcnip2	6	0.55635	0.77242	1	15048	2	-4.6164	0.074466	0.086445	0.999999	1839	1	-4.6164
LOC100771247	5	0.64511	0.79983	1	16209	1	-4.6532	0.074501	0.081468	0.999999	1840	1	-4.6532
Mc5r	6	0.96807	0.97256	1	19959	1	-4.4008	0.074513	0.08648	0.999999	1841	1	-4.4008
Spop	6	0.10839	0.29932	0.893885	6907	3	-5.9026	0.074607	0.086565	0.999999	1842	1	-5.9026
LOC100750843	6	0.93825	0.96034	1	19394	1	-2.6092	0.0747	0.086649	0.999999	1843	1	-2.6092
Tff3	6	0.69473	0.85783	1	16692	2	-5.3381	0.074747	0.086697	0.999999	1844	1	-5.3381
Sdccag8	6	0.040499	0.1378	0.738093	3841	4	-4.7713	0.074793	0.086735	0.999999	1845	1	-4.7713
Prlhr	6	0.097429	0.27538	0.879057	6466	5	-5.6481	0.07484	0.086772	0.999999	1846	1	-5.6481
LOC100757248	5	0.011927	0.046504	0.540412	1944	4	-6.7061	0.074852	0.081782	0.999999	1847	1	-6.7061
Flii	6	0.36288	0.63099	1	12497	3	-4.212	0.074887	0.086813	0.999999	1848	1	-4.212
Bpifb3	6	0.83126	0.91679	1	18099	2	-5.1289	0.074934	0.086863	0.999999	1849	1	-5.1289
Wdr24	6	0.89587	0.94967	1	18940	1	-1.2847	0.07498	0.086901	0.999999	1850	1	-1.2847
Wasf1	6	0.16876	0.39069	0.967905	8443	3	-5.8169	0.075027	0.086938	0.999999	1851	1	-5.8169
Ska3	6	0.77558	0.89107	1	17441	1	-5.4427	0.075074	0.086978	0.999999	1852	1	-5.4427
Sh3rf1	5	0.1316	0.31492	0.907546	7517	3	-5.7016	0.075125	0.082032	0.999999	1853	1	-5.7016
Gal3st4	6	0.23897	0.48694	1	10080	4	-6.1439	0.075167	0.087063	0.999999	1854	1	-6.1439
LOC100755327	6	0.0085824	0.039041	0.517328	1563	5	-4.3878	0.075214	0.087103	0.999999	1855	1	-4.3878
Lin37	6	0.8723	0.93817	1	18614	2	-5.2492	0.075261	0.087144	0.999999	1856	1	-5.2492
LOC100766145	6	0.95834	0.96775	1	19749	1	-6.1064	0.075307	0.08719	0.999999	1857	1	-6.1064
Ear10	6	0.89144	0.94874	1	18909	1	-5.5185	0.075401	0.087262	0.999999	1858	1	-5.5185
Terf2ip	6	0.97459	0.97658	1	20130	1	-3.1442	0.075447	0.087305	0.999999	1859	1	-3.1442
LOC103158783	6	0.078758	0.23282	0.845935	5673	3	-5.5136	0.075494	0.087339	0.999999	1860	1	-5.5136
Ptcd3	6	0.99626	0.99631	1	21170	0	-5.9181	0.075541	0.087378	0.999999	1861	1	-5.9181
LOC103159730	5	0.99495	0.99492	1	21068	0	-2.402	0.075554	0.0824	0.999999	1862	1	-2.402
LOC100765759	6	0.31113	0.57813	1	11581	3	-4.6955	0.075634	0.087465	0.999999	1863	1	-4.6955
Rel	5	0.76796	0.87256	1	17361	1	-4.4132	0.075671	0.082512	0.999999	1864	1	-4.4132
LOC100771621	6	0.95597	0.96674	1	19701	1	-5.641	0.075681	0.087506	0.999999	1865	1	-5.641
Fmn1	6	0.67556	0.85052	1	16535	1	-3.3777	0.075727	0.087543	0.999999	1866	1	-3.3777
Cdh23	6	0.075969	0.22636	0.841284	5545	3	-5.0782	0.075774	0.087584	0.999999	1867	1	-5.0782
Cks2	6	0.99814	0.99815	1	21383	0	-5.1822	0.076008	0.08778	0.999999	1868	1	-5.1822
CTRLX06142	1	0.92396	0.92426	1	19226	0	-2.4868	0.076045	0.076015	0.999999	1869	0	-2.4868
Ramp1	6	0.065419	0.20123	0.81263	5078	5	-6.0964	0.076054	0.087816	0.999999	1870	1	-6.0964
Trappc9	6	0.37194	0.63773	1	12620	3	-6.1129	0.076101	0.087859	0.999999	1871	1	-6.1129
LOC100767461	6	0.35424	0.62453	1	12366	2	-5.1612	0.076148	0.087899	0.999999	1872	1	-5.1612
LOC103158822	6	0.55779	0.77346	1	15058	3	-5.9096	0.076194	0.087935	0.999999	1873	1	-5.9096
Ces3	6	0.61818	0.81668	1	15876	2	-5.5154	0.076287	0.088015	0.999999	1874	1	-5.5154
Cacfd1	6	0.0013082	0.006678	0.308254	449	5	-5.6557	0.076334	0.08806	0.999999	1875	1	-5.6557
Defb123	6	0.6144	0.81396	1	15830	3	-3.4215	0.076381	0.088097	0.999999	1876	1	-3.4215
Zmiz1	6	0.15026	0.36359	0.948329	7992	2	-4.9318	0.076474	0.088164	0.999999	1877	1	-4.9318
Zbtb9	6	0.72075	0.86805	1	16914	2	-5.9185	0.076567	0.088241	0.999999	1878	1	-5.9185
Gtf2ird1	6	0.67284	0.8495	1	16504	2	-3.2525	0.076707	0.08837	0.999999	1879	1	-3.2525
Desi2	6	0.34161	0.61422	1	12200	2	-3.5034	0.076754	0.088408	0.999999	1880	1	-3.5034
Layn	6	0.25669	0.51004	1	10414	3	-0.79752	0.076801	0.088457	0.999999	1881	1	-0.79752
Thbd	6	0.43774	0.68623	1	13464	3	-4.8014	0.076894	0.088531	0.999999	1882	1	-4.8014
Mogs	6	0.14241	0.35201	0.940922	7779	3	-1.1472	0.076987	0.088605	0.999999	1883	1	-1.1472
Zc3h7b	6	0.2656	0.52149	1	10581	3	-6.2165	0.077034	0.088646	0.999999	1884	1	-6.2165
Prodh2	6	0.031786	0.11407	0.700789	3352	5	-5.6015	0.07708	0.088681	0.999999	1885	1	-5.6015
Lrrc31	5	0.28084	0.51062	1	10910	2	-6.0602	0.077153	0.083831	0.999999	1886	1	-6.0602
Wdr11	6	0.82381	0.91312	1	17996	1	-5.9473	0.077174	0.088762	0.999999	1887	1	-5.9473
LOC100766034	6	0.4659	0.70687	1	13876	3	-5.4413	0.07722	0.088799	0.999999	1888	1	-5.4413
LOC100755335	5	0.75423	0.86388	1	17226	1	-3.5615	0.077231	0.083897	0.999999	1889	1	-3.5615
Defb113	4	0.11025	0.25257	0.859606	6981	1	-4.0814	0.07726	0.080065	0.999999	1890	1	-4.0814
Zbtb38	6	0.03799	0.13103	0.727957	3697	2	-4.9089	0.077267	0.088831	0.999999	1891	1	-4.9089
Farp1	6	0.26943	0.52638	1	10668	3	-6.1541	0.077313	0.088874	0.999999	1892	1	-6.1541
Auts2	6	0.040573	0.138	0.738131	3846	3	-6.4231	0.077407	0.088965	0.999999	1893	1	-6.4231
Tekt5	6	0.058403	0.18398	0.795926	4735	5	-6.126	0.077453	0.089006	0.999999	1894	1	-6.126
Mea1	6	0.92826	0.95734	1	19271	1	-5.5687	0.0775	0.089051	0.999999	1895	1	-5.5687
Cxcl14	6	0.86834	0.936	1	18560	1	-3.3373	0.07764	0.089173	0.999999	1896	1	-3.3373
Slc12a3	6	0.82968	0.91598	1	18074	2	-5.9097	0.077686	0.089212	0.999999	1897	1	-5.9097
LOC103158566	6	0.33879	0.61098	1	12157	1	-5.2278	0.077733	0.089253	0.999999	1898	1	-5.2278
LOC100752606	6	0.014312	0.061998	0.584693	2191	4	-5.6735	0.077779	0.089293	0.999999	1899	1	-5.6735
Rnf6	6	0.16225	0.3813	0.961299	8294	4	-5.6614	0.077873	0.089364	0.999999	1900	1	-5.6614
Nasp	6	0.93542	0.95943	1	19350	1	-5.246	0.077919	0.089402	0.999999	1901	1	-5.246
Bud13	6	0.99502	0.99506	1	21075	0	-4.9123	0.077966	0.08944	0.999999	1902	1	-4.9123
LOC100751467	6	0.013047	0.057056	0.567293	2067	4	-5.9322	0.078012	0.089472	0.999999	1903	1	-5.9322
Lmod3	6	0.18882	0.41901	0.983413	8953	4	-4.9787	0.078106	0.089558	0.999999	1904	1	-4.9787
Sulf1	6	0.044108	0.14737	0.755057	4015	4	-5.6844	0.078199	0.089644	0.999999	1905	1	-5.6844
LOC100765388	6	0.37167	0.63753	1	12613	3	-4.3571	0.078338	0.089761	0.999999	1906	1	-4.3571
Fam196b	5	0.027147	0.097584	0.667802	3087	4	-6.4414	0.078399	0.084937	0.999999	1907	1	-6.4414
Gpa33	6	0.065674	0.20186	0.813512	5089	4	-5.7022	0.078432	0.08984	0.999999	1908	1	-5.7022
LOC100763934	6	0.56942	0.78178	1	15211	3	-4.9607	0.078478	0.089879	0.999999	1909	1	-4.9607
Ube3b	6	0.98901	0.98907	1	20707	0	-5.8779	0.078618	0.089994	0.999999	1910	1	-5.8779
Gabrd	6	0.51654	0.74388	1	14537	3	-5.4091	0.078664	0.090038	0.999999	1911	1	-5.4091
Kcns2	6	0.32977	0.60046	1	11968	3	-5.9404	0.078711	0.090074	0.999999	1912	1	-5.9404
Elf2	6	0.6811	0.85261	1	16581	2	-6.0665	0.078758	0.090116	0.999999	1913	1	-6.0665
Anks1a	6	0.11928	0.31677	0.909896	7204	4	-5.5876	0.078897	0.090229	0.999999	1914	1	-5.5876
Wdr41	6	0.46866	0.70884	1	13901	2	-6.2895	0.078944	0.090265	0.999999	1915	1	-6.2895
Kdm2b	6	0.74854	0.87936	1	17163	2	-5.0794	0.07899	0.090307	0.999999	1916	1	-5.0794
Pde6d	6	0.013593	0.059211	0.576184	2120	5	-5.9302	0.079037	0.090349	0.999999	1917	1	-5.9302
Cpped1	6	0.051399	0.1663	0.778321	4386	5	-6.0156	0.079083	0.090388	0.999999	1918	1	-6.0156
LOC107977257	6	0.43161	0.68178	1	13389	3	-5.7595	0.07913	0.090428	0.999999	1919	1	-5.7595
Fam120c	6	0.26404	0.51951	1	10553	4	-5.3117	0.079223	0.090518	0.999999	1920	1	-5.3117
Tigit	6	0.98665	0.98669	1	20584	0	-4.0942	0.079316	0.090589	0.999999	1921	1	-4.0942
LOC100769444	6	0.26523	0.52101	1	10573	4	-4.883	0.079409	0.09066	0.999999	1922	1	-4.883
Scn3a	5	0.094971	0.24604	0.856804	6363	2	-5.2278	0.07941	0.085837	0.999999	1923	1	-5.2278
LOC100774306	6	0.072033	0.21706	0.830355	5374	5	-5.5198	0.079456	0.0907	0.999999	1924	1	-5.5198
Mylk3	6	0.057568	0.18188	0.794534	4694	5	-5.8221	0.079502	0.090739	0.999999	1925	1	-5.8221
LOC100756907	4	0.44726	0.63089	1	13611	2	-6.1737	0.079541	0.082231	0.999999	1926	1	-6.1737
Ccdc36	6	0.94343	0.96203	1	19472	1	-5.2412	0.079549	0.090778	0.999999	1927	1	-5.2412
Tirap	6	0.30845	0.57486	1	11514	2	-4.9312	0.079642	0.090853	0.999999	1928	1	-4.9312
Hgh1	6	0.20836	0.44604	0.997288	9418	4	-6.1189	0.079688	0.090891	0.999999	1929	1	-6.1189
Ptchd4	6	0.53462	0.75689	1	14755	3	-4.7842	0.079735	0.090931	0.999999	1930	1	-4.7842
LOC100762472	6	0.27167	0.52915	1	10718	3	-4.4696	0.079828	0.091003	0.999999	1931	1	-4.4696
Irf5	6	0.021098	0.083447	0.635137	2706	5	-4.3162	0.079967	0.091113	0.999999	1932	1	-4.3162
LOC100766932	1	0.92003	0.92038	1	19179	0	-0.27795	0.079974	0.07999	0.999999	1933	0	-0.27795
Sh3glb1	6	0.94223	0.96164	1	19453	1	-4.7922	0.08006	0.091192	0.999999	1934	1	-4.7922
Nfxl1	6	0.18474	0.41334	0.981091	8850	2	-3.2828	0.080246	0.091353	0.999999	1935	1	-3.2828
LOC100756319	6	0.00021367	0.0011454	0.170443	145	5	-6.4853	0.080293	0.091387	0.999999	1936	1	-6.4853
Isl1	6	0.00088604	0.0046113	0.278188	352	4	-4.7632	0.080339	0.091428	0.999999	1937	1	-4.7632
LOC100766833	6	0.10686	0.29602	0.892166	6848	4	-5.877	0.080386	0.091475	0.999999	1938	1	-5.877
Myo7b	6	0.049882	0.16233	0.773305	4309	3	-5.4636	0.080432	0.091512	0.999999	1939	1	-5.4636
Myot	6	0.053799	0.17237	0.786426	4496	4	-5.4455	0.080479	0.091541	0.999999	1940	1	-5.4455
Plin1	6	0.17498	0.3996	0.973034	8604	3	-5.4509	0.080525	0.091593	0.999999	1941	1	-5.4509
Kpna1	6	0.088998	0.25645	0.864212	6113	2	-5.9161	0.080572	0.09163	0.999999	1942	1	-5.9161
Galnt11	6	0.52437	0.74947	1	14631	3	-5.2391	0.080618	0.09167	0.999999	1943	1	-5.2391
LOC107980143	6	0.83107	0.91669	1	18096	2	-5.8342	0.080665	0.091706	0.999999	1944	1	-5.8342
Clec16a	6	0.55782	0.77348	1	15060	2	-3.324	0.080711	0.091751	0.999999	1945	1	-3.324
Mitf	6	0.12597	0.32706	0.91984	7370	4	-6.4135	0.080897	0.091915	0.999999	1946	1	-6.4135
Smad7	6	0.58825	0.79535	1	15483	3	-6.4916	0.08099	0.091992	0.999999	1947	1	-6.4916
Plekhn1	6	0.35542	0.62543	1	12380	2	-5.9509	0.081083	0.092083	0.999999	1948	1	-5.9509
Psd	6	0.68176	0.85287	1	16585	2	-5.1427	0.081129	0.092133	0.999999	1949	1	-5.1427
LOC100759105	5	0.08108	0.21833	0.832243	5770	1	-6.0205	0.081197	0.087481	0.999999	1950	1	-6.0205
LOC100751656	6	0.96874	0.97293	1	19971	1	-3.5711	0.081315	0.092274	0.999999	1951	1	-3.5711
Tnf	6	0.59296	0.79872	1	15546	3	-6.4972	0.081408	0.092353	0.999999	1952	1	-6.4972
LOC100769300	6	0.61	0.81081	1	15763	2	-4.5252	0.081454	0.092395	0.999999	1953	1	-4.5252
LOC100769409	6	0.46669	0.70744	1	13886	1	-4.0394	0.081501	0.092437	0.999999	1954	1	-4.0394
LOC100754253	5	0.0077643	0.03136	0.482765	1486	3	-5.5263	0.081507	0.087758	0.999999	1955	1	-5.5263
Sri	6	0.078804	0.23294	0.845935	5679	3	-5.2669	0.081547	0.092472	0.999999	1956	1	-5.2669
Odam	6	0.40754	0.66413	1	13087	3	-4.162	0.081594	0.092512	0.999999	1957	1	-4.162
LOC100768662	4	0.99294	0.99294	1	20929	0	-4.8041	0.081663	0.084248	0.999999	1958	1	-4.8041
Ch25h	6	0.17264	0.39627	0.971085	8544	3	-5.277	0.081733	0.092632	0.999999	1959	1	-5.277
LOC100769232	6	0.99346	0.99349	1	20969	0	-5.4489	0.081826	0.092727	0.999999	1960	1	-5.4489
Sertad4	6	0.03013	0.10943	0.689905	3260	5	-5.1918	0.081872	0.092762	0.999999	1961	1	-5.1918
Atp6v1h	6	0.99998	0.99998	1	21884	0	-2.6787	0.082058	0.092935	0.999999	1962	1	-2.6787
Cwf19l2	3	0.99922	0.99922	1	21561	0	-1.347	0.082073	0.08259	0.999999	1963	1	-1.347
CTRLX05879	1	0.91789	0.91827	1	19156	0	-2.7562	0.082109	0.082089	0.999999	1964	0	-2.7562
LOC100765263	6	0.31847	0.58697	1	11736	3	-5.7952	0.082151	0.093007	0.999999	1965	1	-5.7952
LOC100768264	6	0.0197	0.07932	0.626929	2612	2	-5.9155	0.082197	0.093042	0.999999	1966	1	-5.9155
LOC103162718	6	0.18389	0.41214	0.980801	8826	3	-6.1453	0.082243	0.093088	0.999999	1967	1	-6.1453
Abhd17b	5	0.26711	0.4963	1	10616	3	-5.5869	0.082283	0.088452	0.999999	1968	1	-5.5869
CTRLX05332	1	0.91768	0.91805	1	19153	0	-0.31163	0.082317	0.082279	0.999999	1969	0	-0.31163
Mab21l2	6	0.28436	0.54502	1	11000	3	-5.8006	0.082429	0.093238	0.999999	1970	1	-5.8006
Kif2a	6	0.93281	0.95864	1	19317	1	-5.3001	0.082475	0.093279	0.999999	1971	1	-5.3001
Spg11	6	0.42886	0.6798	1	13358	2	-3.8908	0.082661	0.093438	0.999999	1972	1	-3.8908
Tsn	6	0.91566	0.95411	1	19137	1	-5.7362	0.082707	0.093484	0.999999	1973	1	-5.7362
Apoa1	6	0.28577	0.5468	1	11027	3	-5.2839	0.082754	0.09353	0.999999	1974	1	-5.2839
Mcf2	5	0.16431	0.37259	0.953933	8345	4	-5.7205	0.082787	0.088925	0.999999	1975	1	-5.7205
Lsamp	6	0.090837	0.2606	0.86623	6202	5	-5.5176	0.0828	0.093564	0.999999	1976	1	-5.5176
LOC100757422	6	0.042326	0.14264	0.746958	3932	2	-5.6604	0.082847	0.093604	0.999999	1977	1	-5.6604
LOC107977268	6	0.842	0.92213	1	18229	2	-5.6528	0.082893	0.093651	0.999999	1978	1	-5.6528
Rgl2	6	0.87374	0.93897	1	18635	2	-5.2804	0.082986	0.093737	0.999999	1979	1	-5.2804
Parvg	6	0.013067	0.057138	0.567293	2072	5	-5.7688	0.083032	0.093777	0.999999	1980	1	-5.7688
Slc46a3	6	0.31851	0.58702	1	11739	4	-5.2111	0.083078	0.093812	0.999999	1981	1	-5.2111
LOC100772342	6	0.077204	0.22924	0.843997	5601	3	-5.2553	0.083125	0.093855	0.999999	1982	1	-5.2553
Igfn1	6	0.053284	0.17105	0.785279	4470	5	-5.9986	0.083171	0.093896	0.999999	1983	1	-5.9986
Nod1	6	0.10614	0.29448	0.890875	6820	4	-5.92	0.083218	0.093932	0.999999	1984	1	-5.92
Il31	6	0.38888	0.65042	1	12821	3	-5.9687	0.083264	0.09397	0.999999	1985	1	-5.9687
Itih4	6	0.31372	0.5812	1	11642	3	-5.4673	0.08331	0.094013	0.999999	1986	1	-5.4673
LOC100772034	6	0.25084	0.50236	1	10305	2	-6.287	0.083357	0.094051	0.999999	1987	1	-6.287
Ryr3	6	0.24071	0.4892	1	10111	3	-5.8012	0.083403	0.094088	0.999999	1988	1	-5.8012
Grem1	6	0.66109	0.84508	1	16393	2	-5.9374	0.083449	0.094127	0.999999	1989	1	-5.9374
Enam	6	0.13889	0.34673	0.935958	7702	4	-5.5981	0.083496	0.094159	0.999999	1990	1	-5.5981
Slc10a3	6	0.60373	0.8064	1	15694	2	-5.3876	0.083542	0.0942	0.999999	1991	1	-5.3876
Gjb3	6	0.32414	0.59375	1	11849	4	-5.8576	0.083588	0.094244	0.999999	1992	1	-5.8576
Nudt13	6	0.35532	0.62535	1	12377	3	-5.224	0.083635	0.094276	0.999999	1993	1	-5.224
LOC100765053	5	0.15532	0.35714	0.944044	8117	3	-2.4788	0.083678	0.089742	0.999999	1994	1	-2.4788
LOC100752760	6	0.21099	0.44962	0.998979	9487	3	-3.2916	0.083681	0.094325	0.999999	1995	1	-3.2916
LOC100763909	6	0.097573	0.2757	0.879276	6473	5	-5.9119	0.083727	0.094363	0.999999	1996	1	-5.9119
Amh	6	0.014889	0.06423	0.591264	2248	4	-5.5675	0.083774	0.094409	0.999999	1997	1	-5.5675
Lrrc10	6	0.1838	0.41199	0.980549	8824	3	-5.1362	0.083866	0.094501	0.999999	1998	1	-5.1362
LOC100764302	5	0.67226	0.81525	1	16499	2	-3.2787	0.083872	0.089904	0.999999	1999	1	-3.2787
[truncated: 19,909 more rows]

## Sheet: ATF6 Repressors Gene List
id	num	neg|score	neg|p-value	neg|fdr	neg|rank	neg|goodsgrna	neg|lfc	pos|score	pos|p-value	pos|fdr	pos|rank	pos|goodsgrna	pos|lfc
Setdb1	6	1	1	1	21908	0	8.0094	8.96e-23	2.26e-07	0.000215	1	6	8.0094
Atf7ip	6	1	1	1	21904	0	7.9593	1.51e-19	2.26e-07	0.000215	2	6	7.9593
Calr	6	0.53008	0.75342	1	14558	1	7.1706	2.88e-19	2.26e-07	0.000215	3	5	7.1706
Dpm3	6	1	1	1	21909	0	6.3681	2.73e-18	2.26e-07	0.000215	4	6	6.3681
Dpm2	6	1	1	1	21907	0	5.8686	9.95e-17	2.26e-07	0.000215	5	6	5.8686
Ube2g2	6	1	1	1	21906	0	6.4431	8.7e-16	2.26e-07	0.000215	6	6	6.4431
Sel1l	5	1	1	1	21905	0	7.1973	1.17e-15	2.26e-07	0.000215	7	5	7.1973
Syvn1	6	1	1	1	21901	0	7.1845	4.63e-15	2.26e-07	0.000215	8	6	7.1845
Dpm1	6	1	1	1	21903	0	5.353	1.18e-13	2.26e-07	0.000215	9	6	5.353
Ganab	6	0.96777	0.97232	1	19772	1	7.1533	8.89e-13	2.26e-07	0.000215	10	5	7.1533
Mpdu1	6	1	1	1	21902	0	3.9373	2.55e-12	2.26e-07	0.000215	11	6	3.9373
Alg3	6	0.88492	0.94523	1	18653	1	4.8889	2.61e-12	2.26e-07	0.000215	12	5	4.8889
Mogs	6	0.9919	0.99184	1	20748	0	6.8356	3.29e-12	2.26e-07	0.000215	13	5	6.8356
Alg12	6	1	1	1	21900	0	3.9908	1.13e-11	2.26e-07	0.000215	14	6	3.9908
Derl2	6	1	1	1	21898	0	4.4613	3.9e-11	2.26e-07	0.000215	15	6	4.4613
Faf2	5	1	1	1	21899	0	5.7658	5e-11	2.26e-07	0.000215	16	5	5.7658
Nfe2l1	6	1	1	1	21897	0	2.0872	1.39e-10	2.26e-07	0.000215	17	6	2.0872
Ccdc134	6	1	1	1	21896	0	3.1714	1.91e-10	2.26e-07	0.000215	18	6	3.1714
Pdia6	6	0.99937	0.99934	1	21532	0	5.1351	3.17e-09	2.26e-07	0.000215	19	4	5.1351
Tmed10	5	1	1	1	21895	0	3.137	1.19e-08	2.26e-07	0.000215	20	5	3.137
Alg9	6	0.99999	0.99999	1	21870	0	2.202	1.83e-08	2.26e-07	0.000215	21	5	2.202
Uggt1	6	0.99999	0.99999	1	21868	0	4.2367	2.89e-08	2.26e-07	0.000215	22	5	4.2367
Gphr	6	0.99997	0.99997	1	21838	0	1.1021	7.64e-08	2.26e-07	0.000215	23	5	1.1021
Aup1	6	0.79467	0.89951	1	17485	1	3.1445	2.05e-07	6.78e-07	0.000619	24	4	3.1445
Sox15	6	0.887	0.94639	1	18687	1	1.3506	1.18e-06	4.29e-06	0.003762	25	4	1.3506
Arf4	5	0.98638	0.98639	1	20431	0	3.4361	2.31e-06	8.81e-06	0.007426	26	3	3.4361
Tmed2	6	0.99998	0.99998	1	21851	0	1.1397	6.33e-06	2.96e-05	0.024019	27	4	1.1397
Hsp90b1	6	0.99998	0.99998	1	21856	0	0.89024	7.53e-06	3.46e-05	0.027051	28	4	0.89024
LOC103164454	6	0.44545	0.6918	1	13452	3	-1.1387	1.92e-05	7.12e-05	0.053773	29	3	-1.1387
Ngly1	6	0.12741	0.32943	0.933371	7332	2	0.31174	4.07e-05	0.00013128	0.095875	30	3	0.31174
LOC100752128	5	0.45814	0.68497	1	13608	1	1.0248	9.52e-05	0.00027047	0.186108	31	3	1.0248
Hnrnpk	5	0.99967	0.99968	1	21638	0	0.82977	0.00014385	0.00041915	0.275626	32	3	0.82977
Prpf3	5	0.99602	0.99598	1	21049	0	0.54402	0.00016614	0.00049417	0.302668	33	3	0.54402
Tnfrsf21	6	0.94067	0.961	1	19251	1	-2.3406	0.00016728	0.00049733	0.302668	34	3	-2.3406
Tlx1	6	0.91621	0.95414	1	18954	1	-2.6176	0.00019205	0.00056105	0.332218	35	3	-2.6176
Sln	6	0.071974	0.21724	0.830361	5410	3	-5.9246	0.00020465	0.0005972	0.34432	36	2	-5.9246
CTRLX04583	1	0.99973	0.99975	1	21663	0	7.0611	0.00026959	0.00027183	0.186108	37	1	7.0611
Mon2	6	0.99483	0.99479	1	20943	0	-0.77642	0.00027352	0.0007974	0.426105	38	3	-0.77642
Lrrc45	6	0.92523	0.95644	1	19056	1	-4.471	0.00030124	0.00087197	0.454856	39	2	-4.471
LOC100762490	6	0.021954	0.085929	0.615527	2891	4	-5.4449	0.00033403	0.00096823	0.493323	40	2	-5.4449
LOC100760187	6	0.083076	0.24317	0.855524	5871	3	-5.3459	0.00037337	0.0010785	0.537016	41	2	-5.3459
Prkcsh	6	0.99596	0.99595	1	21045	0	-0.27906	0.00041272	0.0011856	0.577228	42	3	-0.27906
CTRLX01200	1	0.99958	0.99961	1	21607	0	6.5098	0.0004189	0.00042774	0.275626	43	1	6.5098
Aplf	6	0.99808	0.99806	1	21285	0	-0.57221	0.00045725	0.0013049	0.621502	44	3	-0.57221
Mitd1	6	0.28362	0.54416	1	10939	4	-4.919	0.00048604	0.0013759	0.641352	45	2	-4.919
Fgl2	6	0.15827	0.37547	0.969143	8096	3	-4.5496	0.00052877	0.0014766	0.660234	46	2	-4.5496
LOC103164428	6	0.033323	0.11851	0.685257	3578	4	-4.0814	0.00060859	0.001619	0.702494	47	2	-4.0814
Iffo1	6	0.52676	0.75104	1	14512	3	-2.8623	0.00063855	0.0016673	0.702494	48	2	-2.8623
CTRLX05100	1	0.99934	0.99938	1	21527	0	6.3648	0.00065946	0.00066996	0.376365	49	1	6.3648
CTRLX12442	1	0.99927	0.99931	1	21507	0	6.4366	0.00072582	0.00072781	0.398639	50	1	6.4366
Lrrc75a	6	0.030634	0.11093	0.671346	3418	4	-3.7041	0.00072925	0.0018384	0.759948	51	2	-3.7041
LOC100764148	5	0.48904	0.71345	1	14003	2	-5.7302	0.00073078	0.0016628	0.702494	52	2	-5.7302
Gpr176	6	0.5254	0.75003	1	14491	3	-4.0769	0.00076718	0.0019055	0.773102	53	2	-4.0769
Foxf2	6	0.129	0.33184	0.934053	7387	4	-3.0752	0.00082584	0.0020248	0.792168	54	2	-3.0752
Mri1	6	0.97109	0.9742	1	19853	1	-6.083	0.00087067	0.0021129	0.801041	55	1	-6.083
Nudt7	6	0.97643	0.97764	1	20014	1	-4.8307	0.0009204	0.002211	0.821027	56	1	-4.8307
LOC100764446	6	0.16882	0.39072	0.978594	8351	3	-5.7337	0.00097014	0.0023032	0.825758	57	1	-5.7337
LOC100765594	5	0.38149	0.61192	1	12641	2	-1.2103	0.00098655	0.0021206	0.801041	58	2	-1.2103
Zfp36l1	6	0.60074	0.8042	1	15476	2	-4.3476	0.0010199	0.0023886	0.825758	59	1	-4.3476
LOC103163901	6	0.75925	0.88389	1	17108	1	-3.2365	0.0010286	0.0024051	0.825758	60	2	-3.2365
LOC103162295	6	0.68721	0.85482	1	16453	2	-4.4327	0.0010387	0.0024288	0.825758	61	2	-4.4327
Nploc4	6	0.99994	0.99994	1	21807	0	-3.5888	0.001059	0.002465	0.825758	62	2	-3.5888
Wdr35	6	0.29642	0.56005	1	11217	4	-5.7486	0.0010696	0.0024876	0.825758	63	1	-5.7486
LOC100770645	6	0.93524	0.95934	1	19179	1	-5.1223	0.0011193	0.002573	0.836561	64	1	-5.1223
Cfap69	6	0.30561	0.57126	1	11402	3	-4.0971	0.0011317	0.0025965	0.836561	65	2	-4.0971
Asb10	6	0.24916	0.5003	1	10201	4	-2.6105	0.0012177	0.002751	0.848905	66	2	-2.6105
Armcx2	6	0.082772	0.24248	0.855182	5860	3	-1.9696	0.0012397	0.0027912	0.849354	67	2	-1.9696
LOC100750903	6	0.40944	0.66527	1	12970	2	-5.5153	0.0013364	0.0029734	0.88151	68	2	-5.5153
Adamts13	6	0.39529	0.65482	1	12793	3	-4.2281	0.0013942	0.0030732	0.88151	69	2	-4.2281
CTRLX11314	1	0.99859	0.99862	1	21363	0	5.4843	0.0014143	0.0014075	0.64243	70	1	5.4843
Slc6a12	6	0.01384	0.060143	0.545397	2294	4	-3.3248	0.0014652	0.0032075	0.882094	71	2	-3.3248
LOC103161777	6	0.20232	0.43782	1	9133	3	-6.0792	0.0014673	0.0032097	0.882094	72	1	-6.0792
Tgm2	5	0.055366	0.16451	0.762375	4656	4	-5.8377	0.0014715	0.0030452	0.88151	73	1	-5.8377
Vmo1	6	0.64324	0.83414	1	16045	3	-6.1617	0.0014748	0.0032269	0.882094	74	2	-6.1617
Ccdc112	6	0.88028	0.94261	1	18574	2	-2.001	0.0014964	0.003263	0.882094	75	2	-2.001
LOC100758507	5	0.74079	0.8556	1	16920	2	-5.8965	0.0015011	0.0030981	0.88151	76	2	-5.8965
LOC100752747	6	0.76102	0.88469	1	17122	2	-4.6361	0.001517	0.0033015	0.882094	77	1	-4.6361
Slc16a13	6	0.0067637	0.031347	0.442139	1490	5	-5.335	0.0015668	0.0034059	0.899022	78	1	-5.335
LOC103164384	6	0.047484	0.15638	0.753872	4271	2	-5.4773	0.0016883	0.0036571	0.938625	79	2	-5.4773
Palm3	6	0.32514	0.5947	1	11791	3	-6.2065	0.0017159	0.0037091	0.938625	80	1	-6.2065
Ankrd13a	5	0.030091	0.10674	0.662882	3392	4	-4.5741	0.00172	0.0035202	0.91814	81	1	-4.5741
Igsf22	6	0.33229	0.60315	1	11935	2	-3.851	0.0017296	0.0037317	0.938625	82	2	-3.851
LOC100766939	6	0.63345	0.82729	1	15915	1	-1.9186	0.0017504	0.0037701	0.938625	83	2	-1.9186
Cdc5l	6	0.99222	0.99218	1	20763	0	-4.5526	0.0018189	0.0039021	0.95099	84	2	-4.5526
Gpc2	6	0.49701	0.72938	1	14112	3	-3.5423	0.0018649	0.0039911	0.951302	85	1	-3.5423
Sla2	6	0.055749	0.17743	0.780362	4674	3	-5.1866	0.0018671	0.0039947	0.951302	86	2	-5.1866
Cenpp	5	0.60979	0.78051	1	15588	1	-4.5732	0.0019271	0.0039066	0.95099	87	1	-4.5732
Ndel1	6	0.23358	0.47997	1	9826	3	-5.0217	0.0019643	0.0041967	0.969684	88	1	-5.0217
Slc19a3	6	0.026553	0.099304	0.64809	3180	4	-6.0645	0.002014	0.0042871	0.969684	89	1	-6.0645
CTRLX00131	1	0.99797	0.99798	1	21266	0	5.5076	0.0020282	0.0020117	0.792168	90	1	5.5076
Skap2	6	0.15904	0.37658	0.969725	8117	4	-6.0146	0.0021057	0.0044493	0.969684	91	2	-6.0146
LOC100772624	6	0.16772	0.38912	0.977718	8323	3	-5.7622	0.0021134	0.0044615	0.969684	92	1	-5.7622
Fbxl20	6	0.99986	0.99986	1	21740	0	-2.1812	0.0021458	0.0045261	0.969684	93	2	-2.1812
Sertm1	6	0.387	0.64866	1	12695	2	-4.4363	0.0021516	0.0045356	0.969684	94	2	-4.4363
Iqcf6	6	0.0033796	0.016318	0.355516	965	5	-3.0979	0.0021631	0.0045569	0.969684	95	1	-3.0979
Tmbim4	6	0.91612	0.95412	1	18953	1	-4.1319	0.0021834	0.0045962	0.969684	96	2	-4.1319
LOC107977149	6	0.92446	0.95626	1	19045	1	-3.5621	0.0021892	0.0046066	0.969684	97	2	-3.5621
Fos	6	0.52067	0.74661	1	14419	3	-5.6787	0.0022009	0.004626	0.969684	98	2	-5.6787
LOC100769429	5	0.4929	0.71702	1	14051	2	-5.9634	0.0022076	0.0044362	0.969684	99	2	-5.9634
Brca1	6	0.99524	0.99521	1	20976	0	-5.7835	0.0022128	0.0046473	0.969684	100	1	-5.7835
LOC100754485	5	0.99958	0.99958	1	21610	0	-4.3082	0.002217	0.0044547	0.969684	101	1	-4.3082
Vav2	6	0.97269	0.97515	1	19906	1	-1.7405	0.0022624	0.0047395	0.979591	102	2	-1.7405
LOC100766962	6	0.64852	0.83787	1	16113	2	-4.8774	0.002316	0.0048325	0.979671	103	2	-4.8774
CTRLX14398	1	0.99763	0.99765	1	21213	0	5.3157	0.0023683	0.0023579	0.825758	104	1	5.3157
Ccdc105	6	0.73968	0.87571	1	16912	2	-4.8168	0.0023701	0.0049252	0.979671	105	2	-4.8168
Rad18	6	0.28805	0.54975	1	11023	3	-2.3887	0.0024096	0.0049993	0.979671	106	2	-2.3887
Cbx6	6	0.050968	0.16532	0.763028	4458	2	-6.0993	0.0024114	0.005002	0.979671	107	1	-6.0993
LOC100753678	6	0.55874	0.77406	1	14951	2	-4.5135	0.0024611	0.0051019	0.979671	108	1	-4.5135
Rhoj	6	0.03461	0.12207	0.693954	3637	4	-6.8822	0.0024802	0.0051353	0.979671	109	2	-6.8822
Atxn7l2	6	0.81944	0.91108	1	17761	2	-4.703	0.0025111	0.0051954	0.979671	110	2	-4.703
Amer1	6	0.033443	0.11885	0.685523	3581	4	-3.923	0.0025205	0.0052203	0.979671	111	2	-3.923
Arl6ip5	6	0.24196	0.49094	1	10023	3	-2.6267	0.0025486	0.0052673	0.979671	112	2	-2.6267
LOC100764539	6	0.38045	0.64377	1	12621	2	-2.6021	0.0025548	0.0052799	0.979671	113	2	-2.6021
Scube3	6	0.18651	0.41586	0.994798	8762	4	-5.2877	0.0025605	0.0052863	0.979671	114	1	-5.2877
Cacng4	6	0.099103	0.2794	0.885373	6525	3	-3.9019	0.0026147	0.0053916	0.979671	115	2	-3.9019
Pdcd7	6	0.96457	0.97066	1	19696	1	-3.8831	0.0026306	0.0054255	0.979671	116	2	-3.8831
Lcp2	6	0.0070714	0.032632	0.449131	1525	4	-3.4884	0.0026433	0.0054494	0.979671	117	2	-3.4884
Plin2	6	0.33059	0.60112	1	11899	4	-4.4336	0.0026465	0.0054553	0.979671	118	2	-4.4336
CTRLX11108	1	0.99729	0.99731	1	21173	0	5.0441	0.0027084	0.002686	0.848905	119	1	5.0441
Spaca1	6	0.51805	0.74469	1	14384	1	-2.6166	0.0027094	0.0055823	0.987624	120	1	-2.6166
Pard6a	6	0.82925	0.91585	1	17871	2	-5.6379	0.0027591	0.0056659	0.987624	121	1	-5.6379
CTRLX04698	1	0.99723	0.99725	1	21163	0	4.7573	0.0027747	0.0027483	0.848905	122	1	4.7573
Dnajc1	6	0.12041	0.31873	0.924166	7153	3	-6.2855	0.0028087	0.0057531	0.987624	123	1	-6.2855
Edem3	6	0.90569	0.95166	1	18863	1	-3.4596	0.0028443	0.0058127	0.987624	124	2	-3.4596
Glod4	6	0.56527	0.77874	1	15043	1	-4.5781	0.0028576	0.0058313	0.987624	125	2	-4.5781
Dusp2	6	0.14853	0.36121	0.958427	7858	3	-6.1075	0.0029174	0.0059361	0.987624	126	2	-6.1075
Wbp1	6	0.836	0.91924	1	17946	2	-4.6511	0.0029241	0.0059443	0.987624	127	2	-4.6511
Ttc29	6	0.055868	0.17773	0.780362	4683	5	-5.9554	0.0030073	0.006092	0.987624	128	1	-5.9554
Ebf4	6	0.98003	0.98037	1	20146	1	-5.1813	0.0030456	0.0061693	0.987624	129	2	-5.1813
Spen	6	0.40572	0.66251	1	12926	1	-2.4992	0.003057	0.0061905	0.987624	130	1	-2.4992
Rnf224	6	0.42849	0.67935	1	13241	3	-5.0165	0.0030867	0.0062507	0.987624	131	2	-5.0165
Trh	6	0.026571	0.099355	0.64809	3181	5	-3.7752	0.0031066	0.0062882	0.987624	132	1	-3.7752
Lyn	6	0.98673	0.98666	1	20452	0	-4.8814	0.0031142	0.0063026	0.987624	133	2	-4.8814
CTRLX08171	1	0.99687	0.99692	1	21121	0	4.3868	0.0031314	0.0030954	0.88151	134	1	4.3868
LOC100774037	6	0.25622	0.50952	1	10362	3	-6.4807	0.0031563	0.0063722	0.987624	135	1	-6.4807
LOC100767190	5	0.86634	0.91624	1	18364	1	-4.5348	0.0031689	0.0062	0.987624	136	1	-4.5348
Pafah1b3	6	0.12354	0.32351	0.928908	7230	4	-5.4757	0.0032059	0.006459	0.987624	137	1	-5.4757
Asb8	6	0.13339	0.33862	0.938259	7507	3	-5.5822	0.0032556	0.0065412	0.987624	138	1	-5.5822
LOC100764431	6	0.16145	0.38012	0.97228	8175	4	-5.5518	0.0032641	0.0065543	0.987624	139	2	-5.5518
Eif4e1b	6	0.42478	0.67669	1	13190	2	-5.7659	0.0033052	0.0066289	0.987624	140	1	-5.7659
Pla2g12b	6	0.21265	0.45209	1	9380	3	-4.4935	0.0033243	0.0066664	0.987624	141	2	-4.4935
LOC100755444	6	0.74597	0.87829	1	16973	2	-4.4466	0.0033548	0.0067256	0.987624	142	1	-4.4466
Cntrl	6	0.018846	0.076716	0.591974	2690	3	-2.6246	0.0033599	0.0067365	0.987624	143	2	-2.6246
LOC100759356	5	0.11509	0.28465	0.890656	7023	3	-5.9925	0.0033757	0.00659	0.987624	144	1	-5.9925
Herc1	6	0.74714	0.87878	1	16986	2	-4.0546	0.0034541	0.0069091	0.994321	145	1	-4.0546
Rasgef1c	6	0.60224	0.80527	1	15493	3	-0.95177	0.0034753	0.0069552	0.994321	146	2	-0.95177
Ephb4	6	0.26259	0.51768	1	10520	2	-1.252	0.0035037	0.0070053	0.994321	147	1	-1.252
Focad	5	0.72106	0.84372	1	16736	2	-3.5222	0.0035411	0.0068924	0.994321	148	1	-3.5222
LOC100751114	6	0.23923	0.4873	1	9964	2	-1.9071	0.0035533	0.0071003	0.994321	149	1	-1.9071
Szt2	6	0.17149	0.39455	0.981286	8410	4	-5.938	0.003603	0.0071902	0.994321	150	1	-5.938
Hrh3	6	0.22549	0.46923	1	9639	3	-2.5974	0.003622	0.0072236	0.994321	151	2	-2.5974
Fam92a1	5	0.52071	0.73395	1	14420	1	-2.6395	0.0036372	0.0070664	0.994321	152	2	-2.6395
LOC103159402	6	0.090384	0.25986	0.872037	6146	5	-6.7089	0.0036526	0.0072783	0.994321	153	1	-6.7089
Gck	6	0.60995	0.81074	1	15590	3	-3.7204	0.0037227	0.0074184	0.994321	154	2	-3.7204
Ankrd10	6	0.039033	0.13413	0.718107	3855	5	-5.518	0.0037518	0.0074649	0.994321	155	1	-5.518
Apcs	6	0.99815	0.99812	1	21293	0	-0.3351	0.0037944	0.0075517	0.994321	156	2	-0.3351
LOC100763769	5	0.9956	0.99556	1	21012	0	-3.5679	0.00385	0.0074604	0.994321	157	2	-3.5679
Prr3	6	0.12323	0.32306	0.928908	7211	4	-5.4401	0.003851	0.0076566	0.994321	158	1	-5.4401
Spdl1	5	0.99903	0.99905	1	21455	0	-4.221	0.003872	0.0075065	0.994321	159	1	-4.221
Ect2	6	0.96794	0.97242	1	19775	1	-6.2649	0.0039006	0.0077478	0.994321	160	1	-6.2649
Ptch2	6	0.1318	0.33619	0.936286	7470	3	-6.1303	0.0039203	0.0077849	0.994321	161	2	-6.1303
Nagk	6	0.95172	0.96496	1	19425	1	-1.2641	0.0039999	0.0079259	0.994321	162	2	-1.2641
LOC100759749	5	0.017172	0.064904	0.559396	2567	4	-5.8023	0.0040373	0.0078215	0.994321	163	1	-5.8023
Myct1	6	0.077723	0.2308	0.84373	5656	4	-5.0166	0.0041032	0.0081049	0.994321	164	2	-5.0166
Sbno2	6	0.028458	0.10483	0.659594	3296	4	-5.89	0.0041229	0.0081442	0.994321	165	2	-5.89
Cd164	6	0.9901	0.99005	1	20657	0	-3.8995	0.0041743	0.0082409	0.994321	166	2	-3.8995
Gemin2	6	0.87807	0.94137	1	18545	1	-5.277	0.0041983	0.0082788	0.994321	167	1	-5.277
Abcd1	6	0.012958	0.056718	0.538054	2196	4	-5.6984	0.0042259	0.0083218	0.994321	168	2	-5.6984
Lat2	6	0.67802	0.8514	1	16375	1	-4.4923	0.0042459	0.0083638	0.994321	169	2	-4.4923
Pde10a	6	0.049241	0.16093	0.758952	4366	3	-6.0251	0.0042539	0.0083801	0.994321	170	2	-6.0251
Trafd1	6	0.14188	0.35136	0.948914	7706	2	-5.5402	0.004298	0.0084673	0.994321	171	2	-5.5402
Chrnb2	6	0.65592	0.84302	1	16195	3	-3.1476	0.0043869	0.0086399	0.994321	172	2	-3.1476
Plekhm2	6	0.42118	0.67403	1	13128	3	-4.9345	0.004395	0.0086503	0.994321	173	2	-4.9345
Adgre3	6	0.89207	0.94878	1	18753	1	-3.5204	0.0044462	0.0087466	0.994321	174	1	-3.5204
LOC100769733	4	0.8997	0.90582	1	18807	1	-1.4017	0.0044516	0.0086074	0.994321	175	2	-1.4017
Angptl8	6	0.057939	0.18301	0.787376	4786	3	-4.3187	0.0044958	0.008832	0.994321	176	2	-4.3187
Dnph1	6	0.67515	0.85031	1	16352	2	-5.0824	0.0045259	0.0088876	0.994321	177	2	-5.0824
Klk11	6	0.12821	0.33063	0.933666	7359	4	-6.2451	0.0045454	0.0089192	0.994321	178	1	-6.2451
Wnt7b	6	0.55725	0.773	1	14931	3	-3.7027	0.0045548	0.0089319	0.994321	179	2	-3.7027
Cndp1	6	0.99287	0.99283	1	20805	0	-1.2416	0.004559	0.0089391	0.994321	180	2	-1.2416
Tmem229b	6	0.13109	0.3351	0.93562	7449	3	-6.0862	0.004595	0.0090082	0.994321	181	1	-6.0862
Smoc2	5	0.21294	0.43884	1	9387	2	-2.7877	0.0046419	0.0089436	0.994321	182	2	-2.7877
LOC100764471	6	0.93859	0.96033	1	19219	1	-2.2323	0.0046504	0.0091113	0.994321	183	2	-2.2323
LOC100772006	6	0.46216	0.70394	1	13651	2	-3.9166	0.0047384	0.0092807	0.994321	184	2	-3.9166
LOC103164026	6	0.18159	0.40899	0.991204	8644	2	-5.8153	0.0047437	0.0092884	0.994321	185	1	-5.8153
Mdm4	4	0.99693	0.99693	1	21128	0	-5.012	0.0047529	0.0092017	0.994321	186	1	-5.012
Khsrp	6	0.088123	0.25475	0.867065	6066	4	-5.8009	0.0047933	0.0093786	0.994321	187	1	-5.8009
Zgpat	6	0.24847	0.49941	1	10185	2	-2.6753	0.0047933	0.0093788	0.994321	188	2	-2.6753
LOC100753484	4	0.16667	0.3375	0.936987	8293	1	-5.1983	0.004819	0.0093273	0.994321	189	1	-5.1983
Adgrb2	6	0.73238	0.87273	1	16841	2	-4.329	0.0048272	0.0094452	0.994321	190	2	-4.329
Vsig2	6	0.96823	0.97259	1	19783	1	-5.7571	0.0048442	0.0094764	0.994321	191	2	-5.7571
LOC100770313	4	0.11276	0.25678	0.869256	6970	3	-5.5136	0.0048521	0.0093978	0.994321	192	1	-5.5136
Aqp4	6	0.64459	0.83513	1	16054	3	-5.4302	0.0048783	0.0095316	0.994321	193	2	-5.4302
Gp9	6	0.095574	0.27161	0.879978	6374	3	-3.0344	0.0049641	0.0096857	0.994321	194	2	-3.0344
Abhd14b	6	0.2826	0.5429	1	10908	3	-6.0755	0.0049684	0.0096938	0.994321	195	2	-6.0755
Araf	6	0.26297	0.51815	1	10530	3	-4.2715	0.0050411	0.0098176	0.994321	196	1	-4.2715
Fam171a1	6	0.49107	0.72507	1	14023	3	-5.1691	0.0050548	0.0098447	0.994321	197	2	-5.1691
Snap47	6	0.37313	0.63836	1	12529	2	-2.7103	0.0050984	0.0099256	0.994321	198	2	-2.7103
LOC100774399	6	0.64242	0.83355	1	16034	2	-4.3916	0.0051114	0.0099392	0.994321	199	2	-4.3916
LOC103163020	6	0.23669	0.48399	1	9907	4	-5.6235	0.0051402	0.0099975	0.994321	200	1	-5.6235
Mrgbp	6	0.26147	0.51626	1	10491	1	-3.2792	0.0051683	0.01005	0.994321	201	2	-3.2792
Arap3	6	0.61583	0.81494	1	15661	1	-6.2398	0.0051898	0.010092	0.994321	202	1	-6.2398
Ngrn	5	0.62712	0.78992	1	15835	1	-3.8298	0.0052948	0.010176	0.994321	203	2	-3.8298
LOC103162217	6	0.63363	0.82741	1	15917	3	-4.3237	0.0053096	0.010313	0.994321	204	2	-4.3237
Rspo3	5	0.47396	0.69961	1	13814	1	-5.2061	0.0053183	0.010219	0.994321	205	1	-5.2061
Enox2	6	0.27729	0.5363	1	10798	3	-4.6319	0.0053384	0.010364	0.994321	206	1	-4.6319
Chst12	6	0.073334	0.22045	0.834598	5465	4	-5.3427	0.005388	0.010461	0.994321	207	1	-5.3427
LOC100766243	6	0.20841	0.44624	1	9269	4	-5.9468	0.0054034	0.010487	0.994321	208	2	-5.9468
Adam19	6	0.15987	0.37779	0.970334	8142	3	-4.5082	0.0054528	0.010575	0.994321	209	2	-4.5082
Lca5l	6	0.043919	0.14712	0.739981	4098	4	-5.8833	0.0054663	0.010602	0.994321	210	2	-5.8833
CTRLX10809	1	0.99452	0.99455	1	20922	0	3.9294	0.0054789	0.005411	0.979671	211	1	3.9294
LOC100761326	6	0.24783	0.49857	1	10175	2	-6.086	0.0054871	0.010643	0.994321	212	1	-6.086
Srgap3	6	0.0061805	0.028845	0.427878	1418	2	-2.9791	0.0055366	0.010722	0.994321	213	1	-2.9791
Scara3	6	0.38349	0.64602	1	12659	2	-5.3445	0.0055431	0.010733	0.994321	214	2	-5.3445
Otud4	6	0.96396	0.97037	1	19680	1	-3.7033	0.0055613	0.010768	0.994321	215	2	-3.7033
LOC100765921	6	0.50323	0.73394	1	14186	3	-3.9142	0.0055862	0.010814	0.994321	216	1	-3.9142
Smpd3	6	0.77998	0.89296	1	17327	1	-3.5886	0.005625	0.010884	0.994321	217	2	-3.5886
Ptges3l	6	0.75275	0.88113	1	17048	2	-6.0594	0.0056357	0.010905	0.994321	218	1	-6.0594
LOC100756820	6	0.14686	0.35881	0.956467	7820	2	-3.2717	0.0056387	0.010915	0.994321	219	2	-3.2717
Tmem87b	5	0.79151	0.88772	1	17451	2	-4.089	0.0056533	0.010858	0.994321	220	2	-4.089
Ip6k3	6	0.0077144	0.035321	0.462346	1603	2	-3.3355	0.0056937	0.011021	0.994321	221	2	-3.3355
Qrich1	5	0.30759	0.53812	1	11436	1	-4.2661	0.0056985	0.010936	0.994321	222	2	-4.2661
Lrrn1	6	0.18695	0.41647	0.994798	8779	3	-4.9822	0.0057675	0.011155	0.994321	223	2	-4.9822
LOC100764703	6	0.24654	0.49693	1	10141	2	-2.5924	0.0057767	0.011173	0.994321	224	2	-2.5924
Lkaaear1	6	0.056316	0.17887	0.781913	4703	5	-6.5372	0.0057843	0.011187	0.994321	225	1	-6.5372
LOC100760636	6	0.037479	0.12998	0.711766	3771	4	-5.7666	0.0058833	0.011378	0.994321	226	1	-5.7666
LOC100773414	6	0.27149	0.52898	1	10697	4	-5.9795	0.0059537	0.011503	0.994321	227	2	-5.9795
LOC107977023	6	0.14643	0.35817	0.955812	7811	4	-5.1088	0.0060319	0.011675	0.994321	228	1	-5.1088
LOC100750729	5	0.24515	0.47313	1	10105	1	-1.7313	0.006124	0.01174	0.994321	229	2	-1.7313
Cab39	6	0.05724	0.18122	0.784658	4754	4	-6.1435	0.006131	0.011852	0.994321	230	1	-6.1435
LOC100773267	6	0.088223	0.25498	0.867189	6070	3	-3.459	0.0061809	0.01195	0.994321	231	2	-3.459
Rab7b	6	0.3946	0.65429	1	12777	3	-3.5391	0.00623	0.012042	0.994321	232	1	-3.5391
Tinagl1	6	0.75572	0.88237	1	17073	2	-4.1496	0.0062479	0.012078	0.994321	233	2	-4.1496
Mxi1	6	0.60019	0.8038	1	15466	2	-2.861	0.0062959	0.012157	0.994321	234	2	-2.861
Chd1l	6	0.61493	0.8143	1	15648	2	-4.0599	0.0063008	0.012166	0.994321	235	2	-4.0599
Slc1a7	6	0.020925	0.082902	0.604647	2830	5	-5.5495	0.006329	0.012224	0.994321	236	1	-5.5495
CTRLX10910	1	0.99365	0.99366	1	20862	0	3.0762	0.0063499	0.0063117	0.987624	237	1	3.0762
CTRLX01049	1	0.99363	0.99363	1	20859	0	3.5255	0.0063748	0.0063324	0.987624	238	1	3.5255
LOC100757474	6	0.017188	0.071737	0.577055	2569	4	-5.8308	0.0063829	0.012328	0.994321	239	2	-5.8308
CTRLX03460	1	0.99361	0.99362	1	20856	0	3.3858	0.0063914	0.0063469	0.987624	240	1	3.3858
Canx	6	0.52545	0.75007	1	14493	2	-4.2832	0.0064775	0.01252	0.994321	241	1	-4.2832
LOC107976979	6	0.16918	0.39125	0.979185	8357	3	-4.0064	0.0064949	0.012556	0.994321	242	2	-4.0064
Capn9	6	0.39333	0.65332	1	12768	3	-5.4117	0.0065046	0.012573	0.994321	243	2	-5.4117
LOC100774366	6	0.22661	0.47073	1	9660	3	-2.8882	0.0065291	0.012619	0.994321	244	2	-2.8882
Ap3d1	6	0.73729	0.87475	1	16885	2	-4.5792	0.0065438	0.012644	0.994321	245	2	-4.5792
Ppp1r12c	6	0.3887	0.64993	1	12717	3	-5.1741	0.0065765	0.012704	0.994321	246	2	-5.1741
Slc37a4	6	0.4109	0.66636	1	12993	2	-5.4347	0.006626	0.012794	0.994321	247	1	-5.4347
CTRL00267	1	0.99337	0.99335	1	20841	0	3.3965	0.0066319	0.0065887	0.987624	248	1	3.3965
LOC100757305	6	0.035618	0.12493	0.699924	3692	2	-3.3996	0.0066422	0.012825	0.994321	249	2	-3.3996
Tfap2e	6	0.25321	0.5056	1	10299	4	-4.2029	0.0066755	0.012873	0.994321	250	1	-4.2029
LOC100752097	6	0.7675	0.88751	1	17197	2	-5.7773	0.0067016	0.012918	0.994321	251	2	-5.7773
LOC100757955	5	0.9978	0.9978	1	21235	0	-5.2416	0.0067216	0.01286	0.994321	252	1	-5.2416
Ralgapa1	6	0.46874	0.70877	1	13731	2	-5.3941	0.006725	0.012962	0.994321	253	1	-5.3941
Ildr2	6	0.051983	0.16796	0.767266	4502	5	-5.2542	0.0067745	0.013044	0.994321	254	1	-5.2542
CTRLX16991	1	0.99319	0.99319	1	20828	0	3.3554	0.0068061	0.0067618	0.987624	255	1	3.3554
LOC100755925	6	0.28802	0.54973	1	11020	4	-4.5596	0.006824	0.013135	0.994321	256	1	-4.5596
LOC100754853	5	0.91263	0.93316	1	18917	1	-5.9434	0.0068454	0.01309	0.994321	257	1	-5.9434
LOC100769651	6	0.060993	0.19063	0.801941	4906	5	-5.7339	0.0068735	0.01322	0.994321	258	1	-5.7339
Fut2	6	0.87048	0.9372	1	18423	2	-1.9187	0.0069316	0.013329	0.994321	259	2	-1.9187
Ska2	6	0.79192	0.89829	1	17459	2	-3.0466	0.0069724	0.013398	0.994321	260	1	-3.0466
Nipa1	5	0.55418	0.75114	1	14888	2	-2.1608	0.0069769	0.013328	0.994321	261	2	-2.1608
LOC100759689	6	0.012488	0.05484	0.533794	2140	3	-4.6232	0.0070219	0.013487	0.994321	262	1	-4.6232
Cited2	6	0.14883	0.36166	0.958675	7867	4	-3.7828	0.0070327	0.013502	0.994321	263	2	-3.7828
LOC100752412	6	1	0.99999	1	21880	0	-2.8085	0.0071549	0.013721	0.994321	264	2	-2.8085
Hapln3	6	0.64849	0.83786	1	16112	2	-4.1001	0.0071703	0.013749	0.994321	265	1	-4.1001
Rxrg	6	0.94154	0.96129	1	19267	1	-5.7804	0.0072524	0.013891	0.994321	266	2	-5.7804
Ncapg2	6	0.98222	0.98226	1	20242	1	-3.2919	0.0072782	0.013939	0.994321	267	2	-3.2919
LOC100768770	6	0.19567	0.42871	1	8982	2	-4.3062	0.0073143	0.014009	0.994321	268	2	-4.3062
Lrp8	6	0.90699	0.95195	1	18875	1	-4.2825	0.0073188	0.014019	0.994321	269	1	-4.2825
Rab3b	6	0.098086	0.27718	0.883267	6487	4	-5.139	0.0073682	0.014109	0.994321	270	1	-5.139
LOC100760289	5	0.94685	0.95138	1	19338	1	-1.8245	0.0074059	0.014082	0.994321	271	2	-1.8245
Sytl1	6	0.85525	0.9291	1	18212	2	-2.3768	0.0074388	0.014225	0.994321	272	2	-2.3768
Depdc5	6	0.76173	0.88499	1	17134	2	-3.315	0.0074671	0.01428	0.994321	273	1	-3.315
LOC100769787	6	0.99654	0.99651	1	21090	0	-5.0623	0.0075166	0.014372	0.994321	274	1	-5.0623
Sigirr	6	0.051406	0.16645	0.766048	4470	4	-5.7378	0.0075661	0.014461	0.994321	275	1	-5.7378
Stx16	6	0.42408	0.67617	1	13178	3	-4.6816	0.0075747	0.014475	0.994321	276	2	-4.6816
Kiaa1683	6	0.18603	0.41523	0.994798	8749	4	-5.1851	0.00758	0.014486	0.994321	277	2	-5.1851
Gc	6	0.64215	0.83336	1	16031	3	-5.4766	0.0076155	0.014544	0.994321	278	1	-5.4766
Jdp2	6	0.33265	0.60356	1	11942	3	-5.3372	0.007665	0.01463	0.994321	279	1	-5.3372
CTRLX18107	1	0.99233	0.99231	1	20768	0	3.1304	0.0076688	0.0076195	0.994321	280	1	3.1304
Znf804b	5	0.73417	0.85159	1	16854	2	-2.9863	0.0077029	0.01464	0.994321	281	2	-2.9863
LOC100765625	6	0.012168	0.053568	0.530814	2109	5	-5.817	0.0077144	0.014707	0.994321	282	1	-5.817
Aldh9a1	6	0.22518	0.46884	1	9632	3	-3.6523	0.0077384	0.014753	0.994321	283	2	-3.6523
Arhgap20	6	0.26686	0.52308	1	10613	4	-3.8686	0.0077639	0.014796	0.994321	284	1	-3.8686
LOC107977081	6	0.81386	0.90843	1	17708	2	-5.6279	0.0078133	0.014896	0.994321	285	1	-5.6279
Crkl	6	0.51148	0.73988	1	14299	3	-2.0024	0.0078341	0.014928	0.994321	286	2	-2.0024
Pfkl	6	0.28248	0.54275	1	10904	3	-5.3347	0.0078628	0.014978	0.994321	287	1	-5.3347
Ccdc9	6	0.12599	0.32731	0.931914	7289	4	-3.7868	0.0078929	0.015032	0.994321	288	2	-3.7868
Trim2	6	0.01923	0.07787	0.594034	2721	3	-4.1607	0.0079122	0.015069	0.994321	289	1	-4.1607
Spats1	5	0.45592	0.68289	1	13583	3	-5.9957	0.0079586	0.015108	0.994321	290	1	-5.9957
Pla2g4c	6	0.0097258	0.0438	0.494134	1861	4	-5.1745	0.0079616	0.015154	0.994321	291	1	-5.1745
Il6	5	0.94665	0.95126	1	19334	1	-3.8428	0.0079701	0.015132	0.994321	292	2	-3.8428
Tmf1	6	0.61248	0.81251	1	15623	1	-5.2579	0.0080273	0.015262	0.994321	293	2	-5.2579
Stx19	6	0.44485	0.69136	1	13444	2	-3.6618	0.0080327	0.015272	0.994321	294	2	-3.6618
Hrh2	6	0.17668	0.4019	0.986664	8537	3	-4.368	0.0081247	0.015434	0.994321	295	2	-4.368
LOC100766489	6	0.47505	0.71342	1	13826	3	-5.1491	0.0081464	0.01547	0.994321	296	2	-5.1491
Abcc9	6	0.002675	0.013126	0.330539	834	5	-5.4226	0.0081594	0.015491	0.994321	297	1	-5.4226
Lysmd2	5	0.40557	0.63538	1	12922	3	-2.3302	0.0081646	0.015511	0.994321	298	1	-2.3302
Ehf	6	0.071305	0.21568	0.829337	5369	3	-4.7303	0.0081682	0.015508	0.994321	299	2	-4.7303
Nyx	6	0.094345	0.26883	0.877108	6330	4	-6.312	0.0081954	0.015549	0.994321	300	2	-6.312
Il1a	6	0.34085	0.61312	1	12086	3	-5.6896	0.0082583	0.01566	0.994321	301	1	-5.6896
LOC100771673	6	0.25173	0.50366	1	10257	3	-4.3939	0.0082718	0.015687	0.994321	302	2	-4.3939
LOC100762819	6	0.026182	0.098238	0.646815	3158	5	-6.0104	0.0083077	0.015752	0.994321	303	1	-6.0104
LOC100770026	5	0.99294	0.99292	1	20808	0	-4.4174	0.0083294	0.015834	0.994321	304	1	-4.4174
LOC100766431	6	0.83617	0.91932	1	17952	2	-1.1166	0.0083321	0.015785	0.994321	305	2	-1.1166
Kiaa0319	6	0.35236	0.62293	1	12251	3	-6.0644	0.0083571	0.015824	0.994321	306	1	-6.0644
Tnk1	6	0.3564	0.62594	1	12321	3	-4.2255	0.0083651	0.015839	0.994321	307	2	-4.2255
LOC100757095	3	0.66348	0.72814	1	16254	1	-1.5473	0.0083753	0.010476	0.994321	308	1	-1.5473
Dcx	6	0.15312	0.36796	0.963837	7974	3	-4.6179	0.0083816	0.015873	0.994321	309	2	-4.6179
Anks1b	6	0.5984	0.80254	1	15443	3	-4.3691	0.0084037	0.015915	0.994321	310	2	-4.3691
LOC100753188	6	0.63583	0.82897	1	15943	2	-3.3772	0.0084065	0.01592	0.994321	311	1	-3.3772
Akain1	6	0.7201	0.86777	1	16728	1	-3.5819	0.0084368	0.015976	0.994321	312	2	-3.5819
Krt15	6	0.023483	0.090464	0.629598	2983	3	-5.1947	0.0084644	0.016032	0.994321	313	2	-5.1947
CTRLX00686	1	0.99151	0.99148	1	20721	0	2.9276	0.00849	0.0084533	0.994321	314	1	2.9276
Ube2r2	6	0.51242	0.74058	1	14308	3	-6.1894	0.0085054	0.016103	0.994321	315	1	-6.1894
Cdc73	5	0.98788	0.98786	1	20513	0	-3.431	0.0085766	0.016084	0.994321	316	1	-3.431
Armt1	6	0.59992	0.8036	1	15463	3	-4.2494	0.0086042	0.016299	0.994321	317	1	-4.2494
LOC100772944	6	0.78598	0.89563	1	17395	1	-3.986	0.0086088	0.016308	0.994321	318	2	-3.986
LOC100762574	6	0.55963	0.77468	1	14969	3	-1.6663	0.0086478	0.016382	0.994321	319	2	-1.6663
Popdc3	6	0.010036	0.045069	0.500736	1884	2	-5.6121	0.0086536	0.016388	0.994321	320	1	-5.6121
Acads	6	0.024551	0.093558	0.635934	3049	3	-3.382	0.0086982	0.016472	0.994321	321	2	-3.382
Rasgrp1	6	0.15181	0.36603	0.96247	7938	4	-4.3819	0.008703	0.016482	0.994321	322	1	-4.3819
Ttc5	6	0.82485	0.91371	1	17827	1	-5.0196	0.0087094	0.016496	0.994321	323	2	-5.0196
Ahnak2	6	0.64153	0.83294	1	16024	3	-2.6283	0.0087206	0.016513	0.994321	324	2	-2.6283
Tmem163	5	0.7612	0.86827	1	17125	2	-2.924	0.0087413	0.01624	0.994321	325	1	-2.924
Rcn3	6	0.018993	0.077172	0.592836	2703	5	-5.8759	0.0087524	0.016562	0.994321	326	1	-5.8759
Rnf212b	6	0.23791	0.48558	1	9936	3	-5.763	0.0087768	0.016617	0.994321	327	2	-5.763
Atp13a3	6	0.99395	0.99389	1	20882	0	-4.8452	0.0087993	0.016663	0.994321	328	2	-4.8452
Grk4	5	0.99635	0.99632	1	21079	0	-4.7829	0.0088237	0.016298	0.994321	329	1	-4.7829
Taf4b	6	0.71159	0.86439	1	16663	2	-4.1073	0.0088512	0.016755	0.994321	330	1	-4.1073
Slc3a1	5	0.24375	0.47161	1	10064	2	-5.1886	0.0088649	0.016345	0.994321	331	1	-5.1886
Dnajb12	6	0.077213	0.22962	0.842952	5633	4	-4.0489	0.0089006	0.016857	0.994321	332	1	-4.0489
Stt3a	6	0.99987	0.99986	1	21746	0	-1.3072	0.0089576	0.016968	0.994321	333	2	-1.3072
Gatad2a	6	0.11106	0.30432	0.91084	6932	4	-4.5197	0.0090202	0.017089	0.994321	334	2	-4.5197
Mapt	6	0.95835	0.96776	1	19556	1	-4.1408	0.0090488	0.017139	0.994321	335	1	-4.1408
Snap29	6	0.31689	0.58488	1	11639	2	-5.3999	0.0090982	0.017243	0.994321	336	1	-5.3999
CTRLX02737	1	0.99089	0.99086	1	20695	0	2.6376	0.0091122	0.0090701	0.994321	337	1	2.6376
Arid3b	6	0.2619	0.51682	1	10501	4	-6.2004	0.0091476	0.017332	0.994321	338	1	-6.2004
Drd2	6	0.11973	0.31771	0.922896	7140	4	-5.8526	0.009197	0.017411	0.994321	339	1	-5.8526
LOC100756505	6	0.38466	0.6469	1	12672	2	-6.1526	0.0092091	0.017436	0.994321	340	2	-6.1526
Fgfr4	6	0.16149	0.38017	0.97228	8176	4	-5.0097	0.0092464	0.017503	0.994321	341	1	-5.0097
Helb	6	0.15215	0.36655	0.962674	7950	4	-4.1299	0.0092552	0.017519	0.994321	342	2	-4.1299
Il34	6	0.19098	0.4221	0.996777	8879	4	-3.7682	0.0093245	0.017641	0.994321	343	2	-3.7682
LOC107977693	6	0.88181	0.94346	1	18604	2	-2.3428	0.0093302	0.017655	0.994321	344	2	-2.3428
LOC100757183	6	0.63213	0.82637	1	15896	3	-6.0343	0.0093452	0.017687	0.994321	345	1	-6.0343
Atp6v0d2	6	0.44134	0.68875	1	13399	3	-4.8956	0.0093708	0.017738	0.994321	346	2	-4.8956
Sgf29	6	0.34908	0.62049	1	12214	2	-5.6831	0.0093766	0.017746	0.994321	347	2	-5.6831
LOC103161373	6	0.11393	0.30874	0.915558	7003	4	-4.1527	0.0093945	0.017783	0.994321	348	1	-4.1527
Ucp1	5	0.61475	0.7832	1	15645	1	-6.1503	0.0094413	0.016844	0.994321	349	1	-6.1503
P4htm	6	0.41744	0.67123	1	13069	3	-4.6367	0.0094933	0.017965	0.994321	350	1	-4.6367
Epha2	6	0.77779	0.89201	1	17300	2	-5.3659	0.0095104	0.017999	0.994321	351	2	-5.3659
Bsx	6	0.82451	0.91354	1	17822	2	-4.8349	0.0095221	0.018019	0.994321	352	2	-4.8349
Apbb2	6	0.29583	0.55935	1	11205	4	-4.6094	0.0095572	0.018068	0.994321	353	2	-4.6094
LOC100759157	6	0.20979	0.44819	1	9307	4	-4.3776	0.0095689	0.018086	0.994321	354	2	-4.3776
LOC103164099	6	0.18624	0.41552	0.994798	8752	4	-2.8062	0.0095982	0.01815	0.994321	355	2	-2.8062
Inpp4a	6	0.44507	0.69152	1	13447	2	-5.0906	0.0096334	0.018217	0.994321	356	2	-5.0906
Lcp1	6	0.781	0.89343	1	17340	2	-5.979	0.0096414	0.018231	0.994321	357	1	-5.979
LOC100774703	6	0.76003	0.88424	1	17110	2	-2.4255	0.0096804	0.018298	0.994321	358	2	-2.4255
Kif5a	6	0.0098585	0.044369	0.496863	1871	4	-5.6534	0.0096908	0.018316	0.994321	359	1	-5.6534
Paics	6	0.33848	0.61035	1	12046	3	-5.9449	0.0098389	0.018592	0.994321	360	1	-5.9449
Abcb4	6	0.072371	0.21816	0.831591	5422	3	-3.8664	0.0098883	0.018681	0.994321	361	1	-3.8664
Gnpda1	6	0.62292	0.81988	1	15772	3	-5.7136	0.0099376	0.018759	0.994321	362	1	-5.7136
Klhdc9	6	0.048918	0.1601	0.757277	4352	3	-4.7584	0.0099649	0.018802	0.994321	363	2	-4.7584
Tnfsf10	6	0.021414	0.084359	0.609531	2859	4	-3.5517	0.010025	0.01891	0.994321	364	2	-3.5517
Tex33	6	0.20865	0.44659	1	9277	4	-5.2802	0.010036	0.018926	0.994321	365	1	-5.2802
Rap1gap	6	0.080036	0.23607	0.849127	5749	3	-3.7552	0.010049	0.018946	0.994321	366	2	-3.7552
Sult4a1	6	0.096742	0.27421	0.881302	6425	5	-4.5273	0.010086	0.019011	0.994321	367	1	-4.5273
Xylt1	6	0.42979	0.68027	1	13255	3	-3.5267	0.010103	0.019045	0.994321	368	2	-3.5267
F2rl1	6	0.72716	0.87061	1	16795	2	-3.8682	0.010135	0.019094	0.994321	369	1	-3.8682
Lrrc73	6	0.29583	0.55935	1	11206	3	-4.4599	0.010234	0.019261	0.994321	370	1	-4.4599
Arfgap1	6	0.78467	0.89508	1	17379	2	-5.7792	0.010247	0.019285	0.994321	371	2	-5.7792
LOC100752545	6	0.29312	0.55598	1	11140	3	-4.6406	0.010332	0.019434	0.994321	372	2	-4.6406
Slc9a3r2	6	0.031462	0.11328	0.675007	3468	4	-4.5382	0.010332	0.019436	0.994321	373	1	-4.5382
LOC100751148	5	0.99179	0.9918	1	20739	0	-3.7898	0.010347	0.017677	0.994321	374	1	-3.7898
Adcy10	6	0.14197	0.3515	0.948986	7712	2	-5.6838	0.010431	0.019624	0.994321	375	1	-5.6838
Slc9c1	5	0.10283	0.26126	0.872966	6661	2	-3.8797	0.01047	0.017798	0.994321	376	1	-3.8797
Kirrel3	6	0.026037	0.097804	0.645418	3151	4	-5.0937	0.010478	0.019714	0.994321	377	2	-5.0937
Mycbp	6	0.13937	0.34759	0.945293	7637	4	-5.662	0.01053	0.019814	0.994321	378	1	-5.662
Pcdh8	6	0.093816	0.26765	0.875882	6306	4	-5.8219	0.010539	0.019829	0.994321	379	2	-5.8219
Stard9	5	0.0015202	0.0067301	0.276125	556	4	-5.938	0.010552	0.017879	0.994321	380	1	-5.938
Ddx59	6	0.92005	0.95512	1	19001	1	-2.5259	0.0106	0.01994	0.994321	381	2	-2.5259
Pdzk1	6	0.99316	0.9931	1	20826	0	-5.2815	0.010606	0.019949	0.994321	382	2	-5.2815
Rnf185	6	0.27857	0.53789	1	10829	2	-5.2645	0.010649	0.02002	0.994321	383	2	-5.2645
Tbx4	6	0.0060668	0.02832	0.423234	1404	5	-6.4251	0.010678	0.020062	0.994321	384	1	-6.4251
Lrg1	6	0.038897	0.13377	0.718107	3843	2	-5.5642	0.010705	0.020114	0.994321	385	2	-5.5642
Nhsl2	6	0.44495	0.69143	1	13445	3	-5.2704	0.010717	0.020137	0.994321	386	2	-5.2704
Prkcb	6	0.054992	0.17551	0.777897	4642	4	-3.6501	0.010727	0.020153	0.994321	387	1	-3.6501
Dnah6	6	0.16244	0.38156	0.973184	8193	4	-4.8683	0.010776	0.020233	0.994321	388	1	-4.8683
Amigo1	6	0.13705	0.34415	0.942604	7589	2	-4.45	0.010816	0.020303	0.994321	389	2	-4.45
Hhip	6	0.025714	0.096888	0.643251	3132	5	-6.0531	0.010826	0.020323	0.994321	390	1	-6.0531
LOC100770743	6	0.72998	0.87175	1	16818	1	-0.1231	0.010866	0.020397	0.994321	391	2	-0.1231
Colgalt2	6	0.58587	0.79362	1	15286	3	-5.1906	0.010875	0.020416	0.994321	392	1	-5.1906
Erh	4	0.60539	0.74909	1	15535	2	-3.9599	0.010888	0.015209	0.994321	393	1	-3.9599
Slc35f6	6	0.19822	0.43225	1	9034	4	-4.5769	0.010924	0.020501	0.994321	394	1	-4.5769
Aak1	6	0.097029	0.27486	0.881509	6443	2	-1.7055	0.010934	0.02052	0.994321	395	2	-1.7055
LOC100756957	6	0.14643	0.35817	0.955812	7810	4	-4.6991	0.010953	0.020549	0.994321	396	2	-4.6991
LOC103159091	6	0.56619	0.77938	1	15057	3	-4.1956	0.010974	0.020592	0.994321	397	1	-4.1956
Mt4	6	0.013444	0.058606	0.540861	2252	4	-5.0948	0.010978	0.020598	0.994321	398	2	-5.0948
Lmod1	6	0.097858	0.27664	0.882858	6477	3	-2.494	0.010984	0.02061	0.994321	399	2	-2.494
Npm2	6	0.7632	0.88564	1	17150	2	-4.7038	0.011003	0.020653	0.994321	400	2	-4.7038
Ing4	6	0.87128	0.93763	1	18443	1	-4.2307	0.011023	0.020687	0.994321	401	1	-4.2307
LOC107977558	6	0.85319	0.92805	1	18174	2	-3.851	0.011034	0.020706	0.994321	402	2	-3.851
Slc38a8	6	0.32072	0.58949	1	11710	3	-5.4808	0.011072	0.020778	0.994321	403	2	-5.4808
Pla1a	6	0.33786	0.60965	1	12036	3	-4.8052	0.011072	0.02078	0.994321	404	1	-4.8052
Hsph1	6	0.32703	0.59695	1	11824	3	-3.7745	0.011084	0.020797	0.994321	405	2	-3.7745
LOC100773130	5	0.9859	0.9859	1	20405	0	-1.7815	0.011087	0.018348	0.994321	406	1	-1.7815
Nt5c3a	4	0.77301	0.84227	1	17252	1	-5.0271	0.011119	0.015431	0.994321	407	1	-5.0271
Ccdc126	6	0.34943	0.62075	1	12220	3	-3.9466	0.011122	0.020867	0.994321	408	2	-3.9466
Cnrip1	6	0.17406	0.39816	0.984355	8473	3	-5.3309	0.011153	0.020927	0.994321	409	2	-5.3309
Bmp10	6	0.97243	0.975	1	19900	1	-2.0821	0.011166	0.020953	0.994321	410	2	-2.0821
Limk1	6	0.0024432	0.012041	0.318303	796	4	-5.8622	0.011171	0.020964	0.994321	411	1	-5.8622
Slc6a19	6	0.65631	0.84325	1	16200	2	-1.4665	0.011185	0.020987	0.994321	412	2	-1.4665
Scn8a	6	0.20303	0.4388	1	9150	4	-4.9846	0.01122	0.021051	0.994321	413	1	-4.9846
Kiaa0895l	6	0.98834	0.98829	1	20543	0	-2.7628	0.011342	0.021281	0.994321	414	2	-2.7628
Psmf1	6	0.13439	0.3401	0.939372	7527	4	-5.2915	0.011368	0.021329	0.994321	415	2	-5.2915
Fstl4	6	0.43476	0.68392	1	13335	3	-4.8821	0.011368	0.021329	0.994321	416	1	-4.8821
Emd	6	0.15134	0.36534	0.962313	7926	3	-3.5403	0.011387	0.02136	0.994321	417	2	-3.5403
Idh3g	6	0.47816	0.71566	1	13860	3	-5.6556	0.011393	0.021372	0.994321	418	2	-5.6556
LOC100762312	6	0.19309	0.42506	0.998424	8927	4	-3.0265	0.011417	0.02142	0.994321	419	1	-3.0265
LOC100757545	6	0.24287	0.49213	1	10048	3	-5.9148	0.011467	0.021493	0.994321	420	1	-5.9148
Csf2	6	0.082877	0.24271	0.855524	5863	4	-6.1886	0.011501	0.021552	0.994321	421	2	-6.1886
Wfdc9	6	0.19946	0.4339	1	9060	4	-6.2643	0.011516	0.021577	0.994321	422	1	-6.2643
Pde6d	6	0.11499	0.31038	0.918178	7019	2	-2.5753	0.011527	0.021596	0.994321	423	2	-2.5753
Gab2	6	0.54821	0.76639	1	14818	3	-5.432	0.011565	0.021671	0.994321	424	1	-5.432
LOC103164448	6	0.23143	0.47717	1	9786	4	-4.9319	0.011615	0.021752	0.994321	425	1	-4.9319
LOC100768063	6	0.075242	0.22502	0.83751	5554	3	-5.5127	0.011664	0.021826	0.994321	426	1	-5.5127
Ostc	6	0.19438	0.42689	0.999675	8956	2	-3.0789	0.011706	0.02189	0.994321	427	2	-3.0789
Klhl33	6	0.12313	0.32291	0.928908	7208	3	-4.4671	0.011751	0.021971	0.994321	428	2	-4.4671
Trim28	6	0.98817	0.98811	1	20526	0	-1.393	0.011802	0.022065	0.994321	429	2	-1.393
Iqcd	6	0.043605	0.14632	0.739299	4081	5	-5.0778	0.011812	0.022078	0.994321	430	1	-5.0778
LOC100766109	6	0.6977	0.85889	1	16545	1	-4.917	0.011815	0.022083	0.994321	431	2	-4.917
Fah	6	0.035567	0.12479	0.699843	3691	4	-5.5675	0.011861	0.022171	0.994321	432	1	-5.5675
Trpm6	6	0.19906	0.43335	1	9049	3	-5.2907	0.011945	0.022321	0.994321	433	2	-5.2907
P2rx6	6	0.46402	0.70532	1	13668	1	-4.7621	0.011951	0.022335	0.994321	434	2	-4.7621
Dnajb1	6	0.076611	0.22826	0.842	5607	5	-6.4329	0.012009	0.022443	0.994321	435	1	-6.4329
Xkr5	6	0.83444	0.91846	1	17931	1	-4.9021	0.012068	0.022551	0.994321	436	2	-4.9021
Ovch2	5	0.63533	0.79446	1	15932	2	-4.3673	0.012114	0.019239	0.994321	437	1	-4.3673
Fbxo46	6	0.71798	0.86691	1	16710	2	-3.6295	0.01212	0.022646	0.994321	438	2	-3.6295
Sec22a	6	0.38385	0.64628	1	12664	2	-5.2083	0.012157	0.022708	0.994321	439	1	-5.2083
Slc1a5	6	0.040422	0.1379	0.724849	3930	4	-5.3332	0.012159	0.022714	0.994321	440	2	-5.3332
Lck	6	0.008553	0.038846	0.477016	1705	5	-6.7551	0.012206	0.022793	0.994321	441	1	-6.7551
Gp2	6	0.24392	0.49351	1	10071	4	-5.6093	0.012225	0.022826	0.994321	442	2	-5.6093
Aplp2	6	0.93459	0.95916	1	19170	1	-3.1794	0.012238	0.022851	0.994321	443	2	-3.1794
Uimc1	6	0.68168	0.85279	1	16411	2	-4.6089	0.012255	0.022877	0.994321	444	1	-4.6089
Tomm6	6	0.71007	0.86379	1	16652	2	-3.1064	0.012284	0.022929	0.994321	445	2	-3.1064
Tesk1	6	0.071324	0.21572	0.829337	5371	5	-5.6077	0.012304	0.022963	0.994321	446	1	-5.6077
Rims4	6	0.091188	0.26169	0.873088	6182	4	-5.5054	0.012354	0.02302	0.994321	447	1	-5.5054
LOC107977556	6	0.2104	0.44901	1	9325	4	-5.2177	0.012501	0.023157	0.994321	448	1	-5.2177
Rab36	6	0.10596	0.29434	0.899765	6774	4	-4.9046	0.0126	0.023241	0.994321	449	1	-4.9046
CTRLX16456	1	0.98735	0.98737	1	20487	0	1.7719	0.012646	0.012564	0.994321	450	1	1.7719
Chfr	6	0.45261	0.69703	1	13542	3	-5.4061	0.012698	0.023324	0.994321	451	1	-5.4061
LOC100752198	5	0.50102	0.72402	1	14157	2	-3.3687	0.01273	0.019748	0.994321	452	1	-3.3687
Pdlim3	6	0.18922	0.41965	0.995756	8832	3	-6.6061	0.012748	0.023368	0.994321	453	1	-6.6061
Irx5	6	0.0044572	0.021239	0.381099	1162	5	-4.7858	0.013043	0.023634	0.994321	454	1	-4.7858
CTRLX02526	1	0.98691	0.98691	1	20457	0	1.6632	0.013094	0.013001	0.994321	455	1	1.6632
Dtd1	6	0.52419	0.74914	1	14477	2	-4.2698	0.013142	0.023717	0.994321	456	1	-4.2698
LOC100756252	6	0.063631	0.19711	0.809476	5028	3	-5.2322	0.013191	0.023761	0.994321	457	1	-5.2322
Ubqln4	6	0.25753	0.51122	1	10401	4	-5.3476	0.01324	0.023796	0.994321	458	1	-5.3476
Irak1	6	0.2896	0.55169	1	11062	3	-5.4893	0.013338	0.023879	0.994321	459	1	-5.4893
LOC103163660	6	0.33693	0.60855	1	12017	3	-6.3282	0.013388	0.023922	0.994321	460	1	-6.3282
Clic6	6	0.0028558	0.013957	0.339241	863	4	-3.2557	0.013437	0.023961	0.994321	461	1	-3.2557
Izumo3	6	0.28385	0.54447	1	10943	3	-5.2198	0.013486	0.024001	0.994321	462	1	-5.2198
LOC100769533	6	0.99821	0.99819	1	21302	0	-3.6555	0.013535	0.024044	0.994321	463	1	-3.6555
Rgn	6	0.81498	0.90897	1	17718	1	-5.7462	0.013585	0.02409	0.994321	464	1	-5.7462
LOC103163926	6	0.6086	0.80978	1	15574	2	-5.1009	0.013634	0.024134	0.994321	465	1	-5.1009
LOC100774561	5	0.96767	0.96785	1	19766	1	-4.2571	0.013674	0.020542	0.994321	466	1	-4.2571
Aftph	6	0.087155	0.25252	0.864413	6029	4	-6.4045	0.013683	0.024181	0.994321	467	1	-6.4045
Mttp	6	0.6031	0.80592	1	15502	3	-4.8149	0.013732	0.024225	0.994321	468	1	-4.8149
Ethe1	6	0.00018851	0.0010143	0.144561	151	4	-4.2699	0.013781	0.024271	0.994321	469	1	-4.2699
Pde6a	6	0.97217	0.97483	1	19891	1	-5.3342	0.013831	0.024317	0.994321	470	1	-5.3342
Elavl2	5	0.61283	0.78217	1	15626	1	-5.3355	0.013838	0.020699	0.994321	471	1	-5.3355
CTRLX11249	1	0.98616	0.98617	1	20418	0	1.8858	0.01384	0.013739	0.994321	472	1	1.8858
Spi1	6	0.068547	0.209	0.820907	5259	5	-5.5631	0.01388	0.024357	0.994321	473	1	-5.5631
Cdhr2	6	0.049346	0.16118	0.758952	4373	3	-4.2577	0.013929	0.02441	0.994321	474	1	-4.2577
LOC100757551	6	0.16974	0.39205	0.979504	8370	3	-4.5435	0.013978	0.024441	0.994321	475	1	-4.5435
Lrch4	5	0.99631	0.99627	1	21072	0	-5.5241	0.014002	0.020852	0.994321	476	1	-5.5241
LOC100758728	6	0.97287	0.97525	1	19913	1	-3.7984	0.014027	0.024481	0.994321	477	1	-3.7984
Glyctk	6	0.047095	0.15542	0.75339	4252	4	-5.7235	0.014076	0.024528	0.994321	478	1	-5.7235
Tbc1d2b	6	0.045779	0.15198	0.746114	4202	5	-5.3502	0.014175	0.024605	0.994321	479	1	-5.3502
Colca2	6	0.34744	0.61929	1	12192	1	-5.9584	0.014224	0.024645	0.994321	480	1	-5.9584
Ttyh3	6	0.98555	0.9855	1	20387	0	-6.0066	0.014273	0.024697	0.994321	481	1	-6.0066
Btn1a1	6	0.28634	0.54764	1	10994	4	-4.5164	0.014322	0.024744	0.994321	482	1	-4.5164
Fmn1	6	0.33396	0.60508	1	11962	3	-5.3987	0.014372	0.024784	0.994321	483	1	-5.3987
Wdr47	6	0.7652	0.88651	1	17168	2	-5.6796	0.014421	0.024825	0.994321	484	1	-5.6796
Pcif1	6	0.34403	0.61672	1	12152	3	-6.3995	0.01447	0.024869	0.994321	485	1	-6.3995
Phka1	6	0.12328	0.32314	0.928908	7216	4	-4.6939	0.014568	0.024951	0.994321	486	1	-4.6939
LOC100759558	6	0.78462	0.89505	1	17378	2	-4.4455	0.014617	0.024988	0.994321	487	1	-4.4455
LOC100753186	6	0.040599	0.13837	0.724892	3946	5	-6.1508	0.014667	0.025033	0.994321	488	1	-6.1508
Ddit4	6	0.054837	0.17512	0.777856	4629	5	-6.36	0.014716	0.025072	0.994321	489	1	-6.36
Lhx5	6	0.55341	0.77018	1	14881	2	-4.613	0.014765	0.025116	0.994321	490	1	-4.613
CTRLX15324	1	0.98521	0.98523	1	20370	0	1.6414	0.014786	0.014682	0.994321	491	1	1.6414
Pdzrn4	6	0.097243	0.27529	0.881519	6453	5	-5.2493	0.014814	0.025153	0.994321	492	1	-5.2493
Fam124a	6	0.078052	0.23155	0.843947	5671	5	-4.2928	0.014863	0.025194	0.994321	493	1	-4.2928
Spg11	6	0.31763	0.58577	1	11658	3	-5.0452	0.014912	0.025236	0.994321	494	1	-5.0452
Adipor2	6	0.85374	0.92833	1	18182	1	-5.4111	0.015109	0.025399	0.994321	495	1	-5.4111
Thap8	6	0.028234	0.10417	0.658639	3282	4	-5.0605	0.015158	0.02545	0.994321	496	1	-5.0605
Nudt16l1	6	0.11508	0.31052	0.918398	7021	4	-5.1781	0.015207	0.025492	0.994321	497	1	-5.1781
CTRLX14522	1	0.98474	0.98474	1	20353	0	1.5223	0.015259	0.015172	0.994321	498	1	1.5223
LOC100760528	6	0.82369	0.91314	1	17813	1	-4.5429	0.015355	0.02561	0.994321	499	1	-4.5429
LOC100758519	6	0.15151	0.3656	0.96237	7931	4	-3.6629	0.015404	0.02565	0.994321	500	1	-3.6629
LOC100774791	4	0.65948	0.79135	1	16224	2	-5.6208	0.015422	0.019424	0.994321	501	1	-5.6208
Prr12	6	0.64874	0.83805	1	16117	3	-3.7627	0.015453	0.025687	0.994321	502	1	-3.7627
LOC100762478	6	0.079661	0.23523	0.84836	5735	5	-5.7866	0.0156	0.025836	0.994321	503	1	-5.7866
Zbtb4	6	0.077433	0.23012	0.843374	5643	4	-6.2878	0.015649	0.025871	0.994321	504	1	-6.2878
Tspan17	5	0.14573	0.34033	0.939458	7790	3	-5.8199	0.015764	0.022485	0.994321	505	1	-5.8199
LOC100768278	3	0.93333	0.93351	1	19155	0	-4.4076	0.015781	0.017451	0.994321	506	1	-4.4076
Tp53inp2	6	0.85688	0.92996	1	18235	2	-4.3026	0.015846	0.026044	0.994321	507	1	-4.3026
Pde4d	6	0.83954	0.92101	1	17993	1	-5.0513	0.015895	0.026092	0.994321	508	1	-5.0513
Znf212	6	0.19926	0.43362	1	9056	4	-5.7986	0.015944	0.026138	0.994321	509	1	-5.7986
LOC100758481	6	0.1484	0.36103	0.958427	7850	4	-6.339	0.015993	0.026182	0.994321	510	1	-6.339
Atp5sl	6	0.30229	0.56726	1	11342	1	-6.7874	0.016042	0.026224	0.994321	511	1	-6.7874
Mdp1	6	0.64654	0.8365	1	16088	2	-6.3062	0.01619	0.026348	0.994321	512	1	-6.3062
Kprp	6	0.030376	0.11021	0.669066	3411	4	-5.8538	0.016239	0.026383	0.994321	513	1	-5.8538
Slc22a15	6	0.02564	0.096681	0.642536	3127	5	-4.9322	0.016337	0.026477	0.994321	514	1	-4.9322
LOC100753681	6	0.018379	0.075314	0.589095	2652	4	-5.7266	0.016435	0.026565	0.994321	515	1	-5.7266
Mark3	6	0.18872	0.41894	0.995387	8826	4	-5.9433	0.016484	0.026609	0.994321	516	1	-5.9433
Bglap	6	0.13951	0.34782	0.945293	7644	4	-5.8883	0.01673	0.026821	0.994321	517	1	-5.8883
CTRLX08852	1	0.98314	0.98318	1	20278	0	1.3456	0.01686	0.016813	0.994321	518	1	1.3456
Slc25a15	5	0.009359	0.037271	0.470525	1813	4	-5.145	0.016869	0.023495	0.994321	519	1	-5.145
Lrit2	6	0.98823	0.98817	1	20532	0	-4.934	0.016877	0.026947	0.994321	520	1	-4.934
Pqlc3	6	0.22476	0.46829	1	9626	4	-5.5093	0.016926	0.026979	0.994321	521	1	-5.5093
CTRLX05201	1	0.98302	0.98306	1	20274	0	0.87012	0.016976	0.01693	0.994321	522	1	0.87012
Fhl3	6	0.10709	0.29678	0.902387	6810	4	-6.1542	0.017024	0.027071	0.994321	523	1	-6.1542
Srsf10	5	0.64607	0.80036	1	16082	1	-5.3543	0.017033	0.023627	0.994321	524	1	-5.3543
Reep1	6	0.15716	0.37385	0.967672	8068	4	-4.843	0.017073	0.027111	0.994321	525	1	-4.843
LOC100765103	6	0.69566	0.85807	1	16535	2	-5.5229	0.017122	0.027142	0.994321	526	1	-5.5229
Gmip	6	0.64606	0.83617	1	16081	3	-3.8162	0.017171	0.027192	0.994321	527	1	-3.8162
Otud7a	6	0.018586	0.075936	0.590345	2670	4	-5.8051	0.01722	0.027239	0.994321	528	1	-5.8051
Sost	6	0.47923	0.71643	1	13878	2	-6.0591	0.017318	0.027322	0.994321	529	1	-6.0591
Bambi	6	0.058195	0.18366	0.787399	4801	4	-4.6642	0.017465	0.02746	0.994321	530	1	-4.6642
Gmfb	5	0.62516	0.78888	1	15804	2	-2.996	0.017605	0.024137	0.994321	531	1	-2.996
Catsper3	6	0.85622	0.9296	1	18226	2	-4.236	0.017613	0.027595	0.994321	532	1	-4.236
C1qtnf7	6	0.065031	0.20044	0.812415	5089	3	-4.6191	0.017662	0.027641	0.994321	533	1	-4.6191
Desi2	6	0.2771	0.53604	1	10793	1	-4.178	0.017711	0.027691	0.994321	534	1	-4.178
Xkr9	5	0.14405	0.33738	0.936987	7756	3	-2.5123	0.017728	0.024253	0.994321	535	1	-2.5123
Slc13a2	6	0.45304	0.69735	1	13546	1	-4.3693	0.01776	0.027732	0.994321	536	1	-4.3693
Chst15	6	0.56507	0.77859	1	15038	2	-5.5948	0.017858	0.027821	0.994321	537	1	-5.5948
CTRL00990	1	0.9821	0.98214	1	20238	0	1.3114	0.017897	0.017848	0.994321	538	1	1.3114
Zfp28	6	0.0226	0.087842	0.620842	2934	3	-5.9025	0.017907	0.027869	0.994321	539	1	-5.9025
LOC100759204	5	0.076313	0.20857	0.820721	5593	2	-3.7656	0.017933	0.024459	0.994321	540	1	-3.7656
Sltm	6	0.96813	0.97253	1	19781	1	-5.2265	0.017956	0.027912	0.994321	541	1	-5.2265
Tmem252	6	0.13426	0.33992	0.939372	7521	4	-2.9636	0.018005	0.027959	0.994321	542	1	-2.9636
Itgb1bp2	6	0.01614	0.068597	0.569275	2498	3	-5.3923	0.018054	0.027997	0.994321	543	1	-5.3923
Cd28	6	0.67366	0.84974	1	16342	2	-5.3748	0.018103	0.028046	0.994321	544	1	-5.3748
Pxdn	6	0.1823	0.40998	0.991963	8660	4	-5.8535	0.018152	0.028087	0.994321	545	1	-5.8535
LOC100759862	6	0.19226	0.42388	0.998315	8904	2	-3.416	0.018201	0.028126	0.994321	546	1	-3.416
Sipa1l1	6	0.11525	0.31079	0.918432	7029	4	-5.3149	0.01825	0.028171	0.994321	547	1	-5.3149
Tm2d1	5	0.7927	0.88849	1	17467	2	-5.5898	0.01826	0.02474	0.994321	548	1	-5.5898
Abcc8	6	0.07706	0.22927	0.84249	5628	4	-4.5633	0.018299	0.028212	0.994321	549	1	-4.5633
Bche	6	0.26636	0.52247	1	10604	2	-5.5078	0.018348	0.028257	0.994321	550	1	-5.5078
LOC100751702	6	0.49784	0.72997	1	14120	3	-5.7038	0.018544	0.028437	0.994321	551	1	-5.7038
Rab5b	6	0.0040027	0.019214	0.36772	1089	5	-6.2484	0.018593	0.028478	0.994321	552	1	-6.2484
Dcdc2	6	0.0078079	0.03573	0.46312	1619	5	-5.7413	0.018691	0.028556	0.994321	553	1	-5.7413
CTRLX12083	1	0.98131	0.98135	1	20200	0	1.1472	0.018693	0.018639	0.994321	554	1	1.1472
Drp2	6	0.77164	0.88933	1	17240	2	-5.4709	0.01874	0.028603	0.994321	555	1	-5.4709
Maneal	6	0.75137	0.88053	1	17035	2	-4.7121	0.018789	0.028644	0.994321	556	1	-4.7121
Pi4k2a	6	0.70325	0.86106	1	16595	2	-4.9331	0.018838	0.028689	0.994321	557	1	-4.9331
CTRLX09160	1	0.98107	0.9811	1	20192	0	0.94978	0.018925	0.018877	0.994321	558	1	0.94978
Mgarp	6	0.33152	0.60223	1	11924	3	-5.6967	0.018985	0.028829	0.994321	559	1	-5.6967
LOC103158711	6	0.66786	0.84757	1	16296	2	-5.8857	0.019034	0.028872	0.994321	560	1	-5.8857
Slc2a4	6	0.37344	0.63857	1	12532	3	-5.4807	0.019083	0.028913	0.994321	561	1	-5.4807
CTRLX13192	1	0.98083	0.98085	1	20181	0	1.0495	0.019174	0.019134	0.994321	562	1	1.0495
Pparg	6	0.78587	0.89558	1	17394	2	-4.8338	0.01923	0.029038	0.994321	563	1	-4.8338
LOC100756701	3	0.50805	0.65772	1	14253	1	-0.41433	0.019273	0.020818	0.994321	564	1	-0.41433
Smyd5	6	0.04014	0.13712	0.724849	3908	4	-4.9132	0.019279	0.029083	0.994321	565	1	-4.9132
LOC100775054	6	0.75593	0.88247	1	17076	2	-5.391	0.019328	0.029125	0.994321	566	1	-5.391
LOC100759233	6	0.0029421	0.014348	0.344231	872	5	-5.5318	0.019377	0.029166	0.994321	567	1	-5.5318
Aff2	6	0.1267	0.32839	0.932623	7312	3	-5.0002	0.019426	0.029211	0.994321	568	1	-5.0002
Elk4	6	0.47013	0.70978	1	13754	3	-4.9777	0.019475	0.029254	0.994321	569	1	-4.9777
CTRLX17918	1	0.98049	0.98051	1	20166	0	1.0774	0.019506	0.019496	0.994321	570	1	1.0774
Fbxl14	6	0.70393	0.86134	1	16597	2	-5.1764	0.019524	0.029291	0.994321	571	1	-5.1764
Wdr83os	6	0.19405	0.4264	0.999261	8951	2	-5.2545	0.019621	0.02938	0.994321	572	1	-5.2545
Npc1l1	6	0.61792	0.81638	1	15694	3	-6.4311	0.01967	0.029428	0.994321	573	1	-6.4311
Ggt6	6	0.00022315	0.0011883	0.151046	165	5	-5.8477	0.019768	0.029511	0.994321	574	1	-5.8477
Cfdp1	5	0.874	0.91866	1	18486	1	-5.9398	0.019771	0.026091	0.994321	575	1	-5.9398
Irf8	6	0.012168	0.053567	0.530814	2108	5	-4.8533	0.019817	0.029558	0.994321	576	1	-4.8533
Bcl2l10	6	0.03719	0.12919	0.709048	3764	4	-6.2025	0.019866	0.029596	0.994321	577	1	-6.2025
Smim18	6	0.41032	0.66593	1	12985	3	-5.6704	0.019915	0.029633	0.994321	578	1	-5.6704
Dzip1l	6	0.42554	0.67724	1	13200	1	-4.7609	0.019964	0.029681	0.994321	579	1	-4.7609
Znf655	6	0.90377	0.95126	1	18843	1	-3.1203	0.020013	0.029731	0.994321	580	1	-3.1203
Dennd2c	5	0.68775	0.82417	1	16461	2	-3.4758	0.020097	0.026383	0.994321	581	1	-3.4758
Tmcc2	6	0.52453	0.74937	1	14481	2	-5.9782	0.020111	0.029815	0.994321	582	1	-5.9782
Atf6b	6	0.77124	0.88916	1	17236	1	-4.0766	0.02016	0.029861	0.994321	583	1	-4.0766
LOC100750512	6	0.10503	0.29234	0.898228	6737	4	-4.7498	0.020258	0.029932	0.994321	584	1	-4.7498
R3hdm4	6	0.063342	0.19639	0.808732	5014	4	-2.8712	0.020307	0.029972	0.994321	585	1	-2.8712
Lsm12	6	0.88912	0.94762	1	18722	2	-4.8653	0.020356	0.030021	0.994321	586	1	-4.8653
LOC100774145	6	0.22457	0.46806	1	9621	3	-5.4516	0.020453	0.030099	0.994321	587	1	-5.4516
LOC100773923	4	0.98124	0.98122	1	20199	0	-3.1357	0.020463	0.024093	0.994321	588	1	-3.1357
Tmem97	6	0.36114	0.62945	1	12382	3	-4.824	0.020502	0.030139	0.994321	589	1	-4.824
Senp3	6	0.28072	0.54057	1	10867	3	-5.2463	0.020551	0.030185	0.994321	590	1	-5.2463
Pcdhgc5	6	0.16661	0.38752	0.977383	8292	3	-5.1803	0.0206	0.030227	0.994321	591	1	-5.1803
Ptrf	6	0.066251	0.20343	0.815057	5154	4	-2.9827	0.020649	0.030285	0.994321	592	1	-2.9827
LOC100765463	6	0.43103	0.68116	1	13264	1	-5.7106	0.020698	0.030326	0.994321	593	1	-5.7106
CTRLX04871	1	0.97922	0.97923	1	20114	0	0.90899	0.020783	0.020732	0.994321	594	1	0.90899
LOC100751981	6	0.0063253	0.029462	0.431245	1435	3	-5.8815	0.020796	0.030413	0.994321	595	1	-5.8815
Ern1	6	0.4995	0.73117	1	14139	1	-2.5148	0.020845	0.030451	0.994321	596	1	-2.5148
Fam173a	6	0.3959	0.65526	1	12801	3	-5.2142	0.020894	0.030499	0.994321	597	1	-5.2142
LOC103164202	6	0.24159	0.49043	1	10015	3	-5.1233	0.020943	0.030547	0.994321	598	1	-5.1233
CTRLX06597	1	0.97902	0.97903	1	20108	0	0.64158	0.020982	0.020921	0.994321	599	1	0.64158
Smco1	6	0.89147	0.94867	1	18749	1	-3.9295	0.020991	0.030587	0.994321	600	1	-3.9295
LOC100771680	5	0.5181	0.73261	1	14385	1	-5.3295	0.021035	0.027203	0.994321	601	1	-5.3295
LOC100751624	6	0.9941	0.99405	1	20892	0	-4.9245	0.02104	0.03064	0.994321	602	1	-4.9245
Myh10	6	0.26511	0.52089	1	10572	2	-5.8142	0.021138	0.030726	0.994321	603	1	-5.8142
Gal3st1	6	0.39965	0.658	1	12849	3	-4.3403	0.021187	0.030768	0.994321	604	1	-4.3403
C2cd2l	6	0.034338	0.12129	0.692805	3620	4	-4.2611	0.021285	0.030859	0.994321	605	1	-4.2611
Znf641	6	0.43727	0.68575	1	13362	3	-6.1352	0.021334	0.030904	0.994321	606	1	-6.1352
Adamts7	6	0.087103	0.25241	0.864413	6028	5	-4.2027	0.021383	0.030945	0.994321	607	1	-4.2027
LOC107979246	5	0.47416	0.6998	1	13818	2	-5.6936	0.021402	0.027528	0.994321	608	1	-5.6936
Hkdc1	6	0.68473	0.8539	1	16428	1	-3.3497	0.021431	0.030994	0.994321	609	1	-3.3497
CTRLX09713	1	0.97852	0.97854	1	20078	0	0.79498	0.02148	0.021413	0.994321	610	1	0.79498
Rnf10	6	0.12626	0.32773	0.931914	7299	4	-6.1955	0.021529	0.031078	0.994321	611	1	-6.1955
Iars	5	0.48228	0.70732	1	13916	2	-4.0127	0.021565	0.027685	0.994321	612	1	-4.0127
Tnfsf15	6	0.63594	0.82904	1	15944	1	-6.637	0.021578	0.031124	0.994321	613	1	-6.637
LOC100764627	6	0.21603	0.45663	1	9455	4	-6.1597	0.021627	0.031172	0.994321	614	1	-6.1597
LOC100772988	6	0.47685	0.7147	1	13840	3	-3.4802	0.021676	0.031218	0.994321	615	1	-3.4802
Sft2d1	6	0.1535	0.36852	0.964862	7981	3	-4.4086	0.021725	0.031257	0.994321	616	1	-4.4086
Gyg1	6	0.16133	0.37996	0.97228	8171	4	-5.6702	0.021774	0.031297	0.994321	617	1	-5.6702
Pard3b	6	0.84049	0.92153	1	18004	2	-4.9569	0.021822	0.031341	0.994321	618	1	-4.9569
Ica1	6	0.063353	0.19642	0.808732	5015	3	-5.7342	0.02192	0.031431	0.994321	619	1	-5.7342
Cops7a	6	0.2362	0.48335	1	9893	3	-5.9004	0.021969	0.03147	0.994321	620	1	-5.9004
Hgh1	6	0.26195	0.51689	1	10502	4	-5.517	0.022018	0.031513	0.994321	621	1	-5.517
Ccdc66	6	0.0036145	0.017436	0.359573	1015	4	-3.7953	0.022116	0.0316	0.994321	622	1	-3.7953
Smyd3	6	0.07332	0.22042	0.834598	5463	4	-4.3644	0.022164	0.031644	0.994321	623	1	-4.3644
Rwdd2a	6	0.28272	0.54305	1	10912	2	-5.3846	0.022213	0.031685	0.994321	624	1	-5.3846
Myef2	6	0.61104	0.8115	1	15606	3	-6.2066	0.022311	0.031767	0.994321	625	1	-6.2066
Rai1	6	0.007692	0.035238	0.462346	1599	5	-4.5489	0.02236	0.031811	0.994321	626	1	-4.5489
Pcp4l1	6	0.051822	0.16754	0.767186	4495	5	-5.1815	0.022457	0.031896	0.994321	627	1	-5.1815
CTRLX17878	1	0.97753	0.97755	1	20047	0	0.64303	0.022467	0.0224	0.994321	628	1	0.64303
Ebna1bp2	6	0.97268	0.97514	1	19905	1	-5.7423	0.022506	0.031937	0.994321	629	1	-5.7423
Adam11	6	0.074791	0.22394	0.836718	5533	5	-5.3432	0.022555	0.031982	0.994321	630	1	-5.3432
Hprt1	5	0.85622	0.91313	1	18225	1	-3.0849	0.022584	0.028582	0.994321	631	1	-3.0849
Usp19	6	0.46207	0.70388	1	13650	1	-4.2773	0.022604	0.03202	0.994321	632	1	-4.2773
Pik3c2a	6	0.70912	0.86341	1	16641	2	-5.6591	0.022653	0.032064	0.994321	633	1	-5.6591
LOC100774582	5	0.60048	0.77549	1	15471	1	-6.577	0.022665	0.028656	0.994321	634	1	-6.577
CTRLX16256	1	0.97731	0.97734	1	20041	0	0.72629	0.022691	0.022635	0.994321	635	1	0.72629
LOC100764719	4	0.92541	0.92601	1	19057	1	-4.8628	0.022715	0.02619	0.994321	636	1	-4.8628
B3gntl1	6	0.71728	0.86664	1	16705	2	-5.7255	0.02275	0.032151	0.994321	637	1	-5.7255
LOC100761350	1	0.97717	0.97719	1	20033	0	0.88605	0.022832	0.022778	0.994321	638	1	0.88605
Hnf1a	6	0.30051	0.56509	1	11308	4	-6.0346	0.022848	0.032239	0.994321	639	1	-6.0346
LOC100758983	6	0.88177	0.94344	1	18603	1	-3.1891	0.022897	0.032287	0.994321	640	1	-3.1891
Hamp	6	0.059521	0.18696	0.794091	4857	5	-5.7476	0.022946	0.032326	0.994321	641	1	-5.7476
Scaf4	6	0.00023073	0.0012272	0.151046	172	4	-2.0671	0.022995	0.032369	0.994321	642	1	-2.0671
LOC100764104	6	0.53489	0.75686	1	14615	3	-5.3805	0.023092	0.032454	0.994321	643	1	-5.3805
CTRLX07412	1	0.97689	0.97691	1	20028	0	0.8228	0.023106	0.023035	0.994321	644	1	0.8228
Fastkd5	6	0.43336	0.68288	1	13306	2	-3.7924	0.023141	0.032506	0.994321	645	1	-3.7924
Tspyl1	6	0.58724	0.79462	1	15297	3	-5.6637	0.02319	0.032544	0.994321	646	1	-5.6637
CTRLX13121	1	0.97677	0.97679	1	20026	0	0.96702	0.02323	0.023163	0.994321	647	1	0.96702
Apbb3	6	0.18893	0.41924	0.995719	8828	4	-5.5816	0.023287	0.032628	0.994321	648	1	-5.5816
Tekt2	6	0.55057	0.76813	1	14844	3	-4.7685	0.023385	0.032715	0.994321	649	1	-4.7685
Dlx3	6	0.27354	0.53159	1	10732	4	-5.841	0.023434	0.032764	0.994321	650	1	-5.841
Sfxn2	6	0.76277	0.88546	1	17146	2	-4.1356	0.02358	0.032889	0.994321	651	1	-4.1356
Ndrg1	6	0.42998	0.68041	1	13256	3	-5.7612	0.023629	0.032928	0.994321	652	1	-5.7612
LOC100754807	5	0.99364	0.99361	1	20861	0	-5.6884	0.023683	0.029602	0.994321	653	1	-5.6884
LOC100753660	6	0.15135	0.36535	0.962313	7927	2	-5.8959	0.023727	0.033014	0.994321	654	1	-5.8959
Ubr4	6	0.78488	0.89516	1	17382	2	-3.3617	0.023775	0.033056	0.994321	655	1	-3.3617
LOC103162768	6	0.034582	0.122	0.693854	3636	5	-4.9173	0.023824	0.033108	0.994321	656	1	-4.9173
CTRLX14712	1	0.9761	0.97611	1	20004	0	0.59031	0.023902	0.02381	0.994321	657	1	0.59031
Usp27x	6	0.26742	0.5238	1	10628	3	-6.0393	0.023922	0.033187	0.994321	658	1	-6.0393
LOC100766493	6	0.24819	0.49904	1	10181	3	-5.2747	0.02397	0.033229	0.994321	659	1	-5.2747
LOC100759775	5	0.72738	0.84743	1	16798	1	-4.4015	0.024009	0.029888	0.994321	660	1	-4.4015
Pyurf	6	0.18376	0.41204	0.992987	8696	3	-6.381	0.024019	0.033268	0.994321	661	1	-6.381
LOC100763520	6	0.98434	0.98426	1	20334	1	-4.6527	0.024117	0.033352	0.994321	662	1	-4.6527
Ccm2l	6	0.54772	0.76607	1	14810	3	-6.1067	0.024166	0.033398	0.994321	663	1	-6.1067
Frmd5	6	0.59856	0.80266	1	15445	2	-5.4181	0.024214	0.03344	0.994321	664	1	-5.4181
Il17re	6	0.82254	0.91259	1	17798	2	-4.313	0.024312	0.033521	0.994321	665	1	-4.313
Ranbp6	6	0.73948	0.87563	1	16908	2	-3.624	0.024361	0.033559	0.994321	666	1	-3.624
LOC100757690	5	0.0046986	0.019616	0.369224	1193	2	-5.4828	0.024375	0.030218	0.994321	667	1	-5.4828
Cspg5	6	0.27442	0.5327	1	10750	3	-6.6629	0.024409	0.033599	0.994321	668	1	-6.6629
Lxn	5	0.95421	0.9565	1	19472	1	-6.6598	0.024456	0.030286	0.994321	669	1	-6.6598
Usb1	6	0.52328	0.74845	1	14462	3	-4.1537	0.024458	0.033637	0.994321	670	1	-4.1537
Pdha1	6	0.57133	0.78308	1	15119	3	-6.3638	0.024507	0.033685	0.994321	671	1	-6.3638
Baiap2l2	6	0.04546	0.15115	0.745063	4186	5	-4.6636	0.024556	0.033734	0.994321	672	1	-4.6636
Kcnh1	6	0.45083	0.69576	1	13529	2	-6.1919	0.024604	0.033779	0.994321	673	1	-6.1919
Dse	6	0.42028	0.67336	1	13114	2	-6.8526	0.024653	0.033819	0.994321	674	1	-6.8526
Nrxn1	6	0.80078	0.90228	1	17558	2	-5.1583	0.024702	0.033866	0.994321	675	1	-5.1583
Kcna2	6	0.62998	0.82486	1	15866	2	-6.2181	0.024751	0.033905	0.994321	676	1	-6.2181
Slc9a3r1	6	0.17071	0.39346	0.98023	8395	4	-6.1808	0.024799	0.033945	0.994321	677	1	-6.1808
Kifc3	6	0.022565	0.087735	0.620842	2932	5	-6.0573	0.024848	0.033985	0.994321	678	1	-6.0573
Wrb	6	0.99609	0.99607	1	21052	0	-6.3594	0.024946	0.034062	0.994321	679	1	-6.3594
Ccdc88b	6	0.33043	0.60093	1	11892	4	-6.5156	0.024994	0.034101	0.994321	680	1	-6.5156
Abr	6	0.98945	0.98939	1	20616	0	-4.5562	0.025043	0.034139	0.994321	681	1	-4.5562
Msantd4	6	0.24528	0.49529	1	10108	3	-5.7814	0.02514	0.034222	0.994321	682	1	-5.7814
P2ry13	5	0.79267	0.88847	1	17466	1	-6.342	0.025228	0.03097	0.994321	683	1	-6.342
Tbc1d8b	6	0.84032	0.92143	1	18002	1	-5.9091	0.025238	0.034309	0.994321	684	1	-5.9091
Glis3	6	0.17423	0.39841	0.984596	8477	4	-6.4275	0.025287	0.034351	0.994321	685	1	-6.4275
Themis	6	0.35241	0.62297	1	12253	1	-3.846	0.025335	0.034395	0.994321	686	1	-3.846
Sec13	6	0.95812	0.96766	1	19548	1	-4.8215	0.025384	0.034438	0.994321	687	1	-4.8215
Rab44	6	0.0017951	0.0089576	0.301001	628	4	-4.904	0.025433	0.034485	0.994321	688	1	-4.904
LOC100758032	6	0.0014153	0.0071043	0.280673	526	5	-6.2242	0.025481	0.03452	0.994321	689	1	-6.2242
CTRLX15382	1	0.97451	0.97452	1	19959	0	0.82234	0.025487	0.025396	0.994321	690	1	0.82234
LOC100773113	6	0.42734	0.67853	1	13228	3	-6.1755	0.02553	0.034571	0.994321	691	1	-6.1755
Thap3	6	0.0066837	0.031014	0.440245	1479	4	-6.0628	0.025676	0.034689	0.994321	692	1	-6.0628
Ipp	6	0.5343	0.75645	1	14609	3	-3.4664	0.025725	0.034734	0.994321	693	1	-3.4664
Rnf183	6	0.040104	0.13702	0.724765	3907	5	-3.8767	0.025774	0.034769	0.994321	694	1	-3.8767
Pank2	5	0.72689	0.84715	1	16793	2	-5.4582	0.025838	0.03152	0.994321	695	1	-5.4582
Ip6k1	6	0.32719	0.59714	1	11826	3	-6.3136	0.025871	0.034865	0.994321	696	1	-6.3136
Bbs4	5	0.10763	0.27053	0.879978	6832	3	-4.7669	0.025878	0.031557	0.994321	697	1	-4.7669
Eif2ak1	6	0.9895	0.98944	1	20619	0	-5.5288	0.02592	0.034914	0.994321	698	1	-5.5288
Cfap43	6	0.57435	0.7853	1	15158	2	-5.2147	0.025968	0.034956	0.994321	699	1	-5.2147
Zar1l	6	0.51539	0.74274	1	14349	3	-5.7367	0.026017	0.034992	0.994321	700	1	-5.7367
LOC100761930	6	0.19882	0.43305	1	9044	1	-4.9044	0.026066	0.035044	0.994321	701	1	-4.9044
Pidd1	6	0.35611	0.62572	1	12318	2	-3.2208	0.026115	0.035088	0.994321	702	1	-3.2208
Slc27a1	6	0.0070216	0.032412	0.44877	1517	5	-6.0185	0.026163	0.035127	0.994321	703	1	-6.0185
Poldip3	6	0.0021631	0.010728	0.310055	726	4	-5.1496	0.026212	0.035169	0.994321	704	1	-5.1496
LOC100760212	6	0.017069	0.071388	0.576196	2559	5	-5.5701	0.026309	0.035256	0.994321	705	1	-5.5701
St13	5	0.99505	0.99502	1	20965	0	-2.9138	0.026406	0.032031	0.994321	706	1	-2.9138
Ganc	6	0.6509	0.83956	1	16145	2	-5.0714	0.026407	0.035348	0.994321	707	1	-5.0714
Zeb1	5	0.78116	0.881	1	17341	2	-2.3931	0.026487	0.032111	0.994321	708	1	-2.3931
LOC100764810	6	0.18629	0.41556	0.994798	8754	2	-5.6559	0.026504	0.035444	0.994321	709	1	-5.6559
LOC100760741	5	0.70744	0.83567	1	16622	1	-6.0662	0.026528	0.032155	0.994321	710	1	-6.0662
LOC100763349	6	0.69549	0.85802	1	16533	2	-5.9904	0.026601	0.03552	0.994321	711	1	-5.9904
Znf326	6	0.11774	0.31463	0.920169	7091	3	-5.571	0.026699	0.035621	0.994321	712	1	-5.571
Tecr	6	0.93232	0.9585	1	19136	1	-4.6296	0.026796	0.035706	0.994321	713	1	-4.6296
Cops4	6	0.99858	0.99857	1	21361	0	-2.7645	0.026845	0.035751	0.994321	714	1	-2.7645
Wnt8a	6	0.61336	0.81318	1	15636	2	-3.3436	0.026893	0.035796	0.994321	715	1	-3.3436
LOC100756432	6	0.0035625	0.017182	0.359573	999	5	-6.0528	0.026942	0.035832	0.994321	716	1	-6.0528
Ccer1	6	0.062547	0.19443	0.807593	4969	4	-5.6189	0.026991	0.035878	0.994321	717	1	-5.6189
Glra4	6	0.41058	0.66612	1	12991	1	-4.4194	0.027185	0.036032	0.994321	718	1	-4.4194
Chrna3	6	0.88816	0.94705	1	18703	1	-4.6985	0.027234	0.036082	0.994321	719	1	-4.6985
Sema3c	6	0.043711	0.14659	0.7395	4090	4	-3.3485	0.027331	0.036164	0.994321	720	1	-3.3485
Mroh7	6	0.99428	0.99424	1	20903	0	-4.4138	0.02738	0.036209	0.994321	721	1	-4.4138
LOC100758033	5	0.97391	0.97395	1	19941	0	-5.2099	0.027421	0.032966	0.994321	722	1	-5.2099
Ndfip1	5	0.11975	0.29327	0.898907	7141	2	-3.5106	0.027461	0.033003	0.994321	723	1	-3.5106
LOC103164189	6	0.15962	0.37742	0.970249	8136	3	-5.3896	0.027526	0.036334	0.994321	724	1	-5.3896
CTRLX02795	1	0.97246	0.97248	1	19901	0	0.25342	0.027536	0.027439	0.994321	725	1	0.25342
Btbd2	6	0.78599	0.89563	1	17396	2	-4.3492	0.027574	0.036376	0.994321	726	1	-4.3492
Chrm2	6	0.99452	0.99448	1	20923	0	-3.8986	0.027671	0.036467	0.994321	727	1	-3.8986
LOC103164548	6	0.83733	0.91992	1	17966	2	-5.4811	0.027769	0.036548	0.994321	728	1	-5.4811
Tas2r3	6	0.059518	0.18695	0.794091	4856	4	-5.0445	0.027817	0.036589	0.994321	729	1	-5.0445
Gpalpp1	6	0.56696	0.77995	1	15066	1	-3.7856	0.027866	0.036627	0.994321	730	1	-3.7856
Scrt2	6	0.023314	0.089953	0.628637	2970	5	-5.7006	0.027915	0.036664	0.994321	731	1	-5.7006
LOC103160432	6	0.50625	0.73613	1	14227	2	-5.8094	0.028012	0.036745	0.994321	732	1	-5.8094
Spatc1	6	0.058329	0.18401	0.788301	4808	4	-5.309	0.02806	0.036791	0.994321	733	1	-5.309
LOC103164392	6	0.99523	0.99521	1	20975	0	-3.8802	0.028206	0.036923	0.994321	734	1	-3.8802
Slc36a2	6	0.026399	0.098863	0.647485	3172	4	-5.3829	0.028255	0.036962	0.994321	735	1	-5.3829
CTRLX18552	1	0.97174	0.97176	1	19878	0	0.19523	0.028257	0.028171	0.994321	736	1	0.19523
Tmem191c	6	0.012019	0.052977	0.5289	2092	5	-4.6843	0.028303	0.037013	0.994321	737	1	-4.6843
Elane	6	0.89913	0.95026	1	18801	1	-5.7359	0.028401	0.037113	0.994321	738	1	-5.7359
Pkp2	6	0.2463	0.4966	1	10137	3	-4.3135	0.028449	0.037155	0.994321	739	1	-4.3135
CTRLX01124	1	0.97153	0.97154	1	19871	0	0.22249	0.028473	0.02838	0.994321	740	1	0.22249
Sdad1	4	0.95413	0.954	1	19469	0	-4.8882	0.028507	0.031529	0.994321	741	1	-4.8882
Amdhd1	6	0.56204	0.77642	1	15002	3	-3.6461	0.028546	0.03723	0.994321	742	1	-3.6461
LOC107977678	6	0.49108	0.72507	1	14024	2	-5.0908	0.028643	0.037314	0.994321	743	1	-5.0908
Rexo2	6	0.89027	0.94828	1	18743	2	-6.6262	0.028692	0.037362	0.994321	744	1	-6.6262
Smcp	6	0.043408	0.14579	0.738533	4070	4	-4.9279	0.028789	0.037454	0.994321	745	1	-4.9279
Sgk3	6	0.42147	0.67424	1	13131	3	-6.1015	0.028838	0.037496	0.994321	746	1	-6.1015
Brk1	6	0.34289	0.61552	1	12136	4	-5.656	0.028886	0.037533	0.994321	747	1	-5.656
LOC100760076	6	0.93402	0.95898	1	19163	1	-5.741	0.028983	0.037609	0.994321	748	1	-5.741
LOC100752166	5	0.014289	0.054779	0.533794	2338	2	-5.7376	0.029002	0.034405	0.994321	749	1	-5.7376
Calhm2	6	0.21835	0.45969	1	9498	3	-2.2554	0.029081	0.03769	0.994321	750	1	-2.2554
LOC100760306	6	0.056977	0.18058	0.784282	4734	3	-4.0805	0.029129	0.037739	0.994321	751	1	-4.0805
Hoxd8	6	0.65415	0.84181	1	16175	3	-5.1361	0.029226	0.037815	0.994321	752	1	-5.1361
2001-03-01	10	0.26364	0.58199	1	10545	3	-4.4446	0.029308	0.052594	0.994321	753	2	-4.4446
Enpp3	6	0.83835	0.92042	1	17977	2	-2.991	0.029323	0.037909	0.994321	754	1	-2.991
Tbc1d10b	6	0.24629	0.4966	1	10136	3	-6.0321	0.029372	0.037949	0.994321	755	1	-6.0321
CTRLX10027	1	0.97058	0.97065	1	19843	0	0.13204	0.029419	0.029337	0.994321	756	1	0.13204
Myrf	6	0.17283	0.39647	0.982714	8445	2	-3.9509	0.02942	0.037988	0.994321	757	1	-3.9509
CTRLX12842	1	0.97048	0.97054	1	19838	0	0.12076	0.029518	0.029434	0.994321	758	1	0.12076
Msantd3	6	0.81456	0.90877	1	17716	2	-4.428	0.029566	0.038117	0.994321	759	1	-4.428
LOC100773884	5	0.98284	0.98291	1	20266	0	-5.244	0.029609	0.034926	0.994321	760	1	-5.244
Leo1	6	0.22385	0.46708	1	9612	4	-5.8443	0.029615	0.038161	0.994321	761	1	-5.8443
Ids	6	0.28989	0.55204	1	11069	4	-5.8077	0.029663	0.038198	0.994321	762	1	-5.8077
CTRLX13547	1	0.9702	0.97028	1	19832	0	0.11525	0.0298	0.029724	0.994321	763	1	0.11525
Comtd1	6	0.82069	0.91168	1	17780	2	-6.3355	0.029809	0.038326	0.994321	764	1	-6.3355
LOC100773525	6	0.97112	0.97422	1	19855	1	-5.1952	0.029906	0.038412	0.994321	765	1	-5.1952
Trib2	6	0.019543	0.078808	0.595375	2745	5	-4.165	0.029954	0.038448	0.994321	766	1	-4.165
Myoz1	6	0.032365	0.11583	0.680335	3527	5	-5.0193	0.030003	0.038493	0.994321	767	1	-5.0193
Ficd	6	0.9236	0.95605	1	19037	1	-3.4461	0.030051	0.038534	0.994321	768	1	-3.4461
Tmx3	5	0.94174	0.94818	1	19270	1	-4.1418	0.030095	0.035387	0.994321	769	1	-4.1418
Dand5	6	0.38221	0.6451	1	12650	2	-5.2448	0.0301	0.038579	0.994321	770	1	-5.2448
Gsap	6	0.57622	0.78662	1	15180	2	-6.0808	0.030148	0.038615	0.994321	771	1	-6.0808
LOC100750926	6	0.55403	0.77064	1	14886	3	-5.8137	0.030245	0.038696	0.994321	772	1	-5.8137
Ca13	6	0.00022775	0.0012123	0.151046	170	5	-4.6247	0.030294	0.03874	0.994321	773	1	-4.6247
Spa17	5	0.032574	0.11341	0.675007	3540	3	-5.6905	0.030338	0.035594	0.994321	774	1	-5.6905
F13b	6	0.45544	0.69909	1	13574	1	-6.1762	0.030391	0.038824	0.994321	775	1	-6.1762
Kcnj16	6	0.33301	0.60398	1	11950	2	-5.093	0.03044	0.038864	0.994321	776	1	-5.093
Hif1an	6	0.0094167	0.042492	0.489977	1819	4	-5.1145	0.030488	0.038908	0.994321	777	1	-5.1145
LOC100770072	4	0.76008	0.83746	1	17111	1	-2.5368	0.030519	0.033368	0.994321	778	1	-2.5368
Pxmp2	6	0.17976	0.40636	0.989736	8601	4	-5.3924	0.030585	0.038991	0.994321	779	1	-5.3924
CTRLX02476	1	0.96938	0.96947	1	19809	0	0.047462	0.030621	0.030502	0.994321	780	0	0.047462
Fgd5	6	0.51421	0.74188	1	14334	3	-4.0873	0.030634	0.039032	0.994321	781	1	-4.0873
Cmc2	6	0.94119	0.96118	1	19262	1	-4.6553	0.030682	0.03907	0.994321	782	1	-4.6553
LOC100762189	6	0.0029621	0.014429	0.344231	875	5	-5.1957	0.03073	0.039115	0.994321	783	1	-5.1957
Cdpf1	6	0.25964	0.51388	1	10449	3	-6.4461	0.030779	0.039161	0.994321	784	1	-6.4461
Grk6	6	0.17303	0.39674	0.983121	8449	2	-5.7089	0.030876	0.039247	0.994321	785	1	-5.7089
Shisa4	6	0.42428	0.67633	1	13181	1	-5.7677	0.031021	0.039376	0.994321	786	1	-5.7677
Bcas3	6	0.28936	0.55136	1	11057	2	-3.7842	0.03107	0.039413	0.994321	787	1	-3.7842
Kdelr2	6	0.92056	0.95523	1	19013	1	-4.0559	0.031118	0.039454	0.994321	788	1	-4.0559
LOC100765771	6	0.94286	0.96174	1	19280	1	-6.0299	0.031215	0.039541	0.994321	789	1	-6.0299
Fstl1	6	0.60081	0.80424	1	15478	3	-5.9679	0.031264	0.039588	0.994321	790	1	-5.9679
Vstm5	6	0.55311	0.76998	1	14877	2	-3.7066	0.031361	0.039667	0.994321	791	1	-3.7066
LOC100772755	6	0.99921	0.99919	1	21491	0	-5.8398	0.031409	0.039704	0.994321	792	1	-5.8398
Ly6d	6	0.34211	0.61461	1	12114	2	-5.3036	0.031458	0.039756	0.994321	793	1	-5.3036
Aire	6	0.21772	0.45884	1	9484	3	-6.3138	0.031506	0.039804	0.994321	794	1	-6.3138
Rubcn	6	0.011369	0.050423	0.521507	2021	5	-4.8863	0.031555	0.039846	0.994321	795	1	-4.8863
Tdo2	5	0.19339	0.41763	0.994907	8938	2	-5.2814	0.031632	0.036778	0.994321	796	1	-5.2814
Ppfibp2	6	0.18085	0.40792	0.990771	8626	3	-2.3608	0.031651	0.039936	0.994321	797	1	-2.3608
Galnt12	6	0.39759	0.65647	1	12821	3	-5.0666	0.031797	0.040076	0.994321	798	1	-5.0666
LOC100760728	6	0.079613	0.23512	0.84836	5732	2	-4.4183	0.031845	0.040116	0.994321	799	1	-4.4183
LOC100760951	6	0.0028584	0.013967	0.339241	864	5	-5.7667	0.031894	0.040157	0.994321	800	1	-5.7667
Tspan18	6	0.55528	0.77154	1	14907	2	-4.8751	0.031942	0.040202	0.994321	801	1	-4.8751
LOC100756876	6	0.0018429	0.0091935	0.302053	638	4	-3.3315	0.031991	0.040252	0.994321	802	1	-3.3315
LOC100755361	6	0.036379	0.12702	0.704689	3729	5	-5.5677	0.032039	0.04029	0.994321	803	1	-5.5677
Chat	6	0.56203	0.77641	1	15001	3	-5.7417	0.032136	0.040375	0.994321	804	1	-5.7417
Sema4f	6	0.0093452	0.042186	0.488242	1811	3	-5.5709	0.032281	0.040509	0.994321	805	1	-5.5709
Slc1a6	6	0.023729	0.091152	0.629757	2998	3	-5.7519	0.03233	0.040549	0.994321	806	1	-5.7519
Lgals1	6	0.26706	0.52334	1	10616	4	-4.8749	0.032378	0.040591	0.994321	807	1	-4.8749
LOC100757930	5	0.054436	0.16246	0.760305	4612	2	-2.6483	0.0324	0.037474	0.994321	808	1	-2.6483
Hopx	6	0.31622	0.58409	1	11626	3	-5.6466	0.032475	0.040693	0.994321	809	1	-5.6466
Cd2ap	4	0.58879	0.73624	1	15326	2	-2.5128	0.032495	0.035239	0.994321	810	1	-2.5128
LOC100760472	6	0.69075	0.85619	1	16486	2	-5.2668	0.032572	0.040781	0.994321	811	1	-5.2668
LOC100772390	3	0.068635	0.15901	0.756348	5262	2	-5.1525	0.032575	0.033581	0.994321	812	1	-5.1525
LOC100754200	5	0.95424	0.95652	1	19473	1	-5.463	0.032602	0.037652	0.994321	813	1	-5.463
Slc27a3	6	0.071503	0.21612	0.829514	5382	4	-4.4698	0.03262	0.040818	0.994321	814	1	-4.4698
Kiaa1257	6	0.80053	0.90216	1	17549	2	-2.8452	0.032669	0.040865	0.994321	815	1	-2.8452
Znf329	5	0.10835	0.27193	0.879978	6853	2	-5.8598	0.032682	0.037721	0.994321	816	1	-5.8598
LOC100772655	6	0.75664	0.88278	1	17083	2	-4.2174	0.032717	0.040909	0.994321	817	1	-4.2174
Il12a	6	0.39484	0.65448	1	12783	3	-5.5009	0.032911	0.041091	0.994321	818	1	-5.5009
Prrg2	6	0.1588	0.37623	0.969725	8108	3	-5.1094	0.032959	0.041138	0.994321	819	1	-5.1094
LOC103161891	6	0.52987	0.75327	1	14551	3	-4.6566	0.033104	0.041258	0.994321	820	1	-4.6566
Nmb	6	0.10364	0.28933	0.894683	6692	5	-5.5241	0.033153	0.04131	0.994321	821	1	-5.5241
Ifnar1	6	0.30144	0.56623	1	11325	2	-4.0132	0.033201	0.041353	0.994321	822	1	-4.0132
Dennd3	6	0.2317	0.47752	1	9791	4	-6.1402	0.033249	0.041394	0.994321	823	1	-6.1402
Srsf4	6	0.11911	0.31677	0.921934	7127	4	-5.3059	0.033298	0.041435	0.994321	824	1	-5.3059
LOC100766213	6	0.76555	0.88667	1	17169	1	-5.4123	0.033346	0.041481	0.994321	825	1	-5.4123
LOC100768756	6	0.99796	0.99794	1	21264	0	-6.4667	0.033395	0.041518	0.994321	826	1	-6.4667
CTRLX14775	1	0.96657	0.96673	1	19741	0	-0.10688	0.033425	0.033349	0.994321	827	0	-0.10688
Pole2	6	0.94449	0.9623	1	19303	1	-4.062	0.033443	0.04156	0.994321	828	1	-4.062
A4gnt	6	0.21964	0.46143	1	9524	3	-6.1276	0.033491	0.041602	0.994321	829	1	-6.1276
LOC100763764	6	0.17153	0.3946	0.981286	8411	4	-5.8654	0.03354	0.041641	0.994321	830	1	-5.8654
Slc5a7	6	0.92989	0.95778	1	19100	1	-4.1181	0.033588	0.041688	0.994321	831	1	-4.1181
Cables1	6	0.19501	0.42781	1	8970	4	-4.3396	0.033636	0.041736	0.994321	832	1	-4.3396
Epx	6	0.17223	0.39561	0.98192	8429	4	-5.7165	0.033685	0.041773	0.994321	833	1	-5.7165
Thra	6	0.094427	0.26901	0.877279	6332	3	-5.5604	0.033733	0.041819	0.994321	834	1	-5.5604
Fam179a	6	0.21106	0.4499	1	9341	4	-4.7894	0.033782	0.041857	0.994321	835	1	-4.7894
LOC100751053	6	0.019661	0.079164	0.596016	2751	5	-5.4513	0.03383	0.041904	0.994321	836	1	-5.4513
CTRLX04544	1	0.96616	0.96633	1	19732	0	-0.14313	0.03384	0.033764	0.994321	837	0	-0.14313
Qpctl	6	0.0084559	0.038425	0.474692	1696	3	-5.7627	0.033975	0.04204	0.994321	838	1	-5.7627
LOC100750789	6	0.4881	0.72295	1	13992	2	-4.6493	0.034023	0.042087	0.994321	839	1	-4.6493
Tmprss2	6	0.28433	0.54508	1	10951	3	-5.7267	0.03412	0.042175	0.994321	840	1	-5.7267
Tectb	6	0.93198	0.95841	1	19132	1	-5.846	0.034168	0.042214	0.994321	841	1	-5.846
LOC100767490	6	0.88105	0.94304	1	18585	2	-5.2466	0.034217	0.042248	0.994321	842	1	-5.2466
LOC107978987	5	0.69926	0.83085	1	16559	2	-5.9407	0.034297	0.039179	0.994321	843	1	-5.9407
LOC103164424	6	0.37003	0.63605	1	12494	3	-5.206	0.034313	0.042334	0.994321	844	1	-5.206
LOC100763617	6	0.42937	0.67997	1	13250	3	-5.5602	0.034362	0.042374	0.994321	845	1	-5.5602
Cpa2	5	0.16017	0.36553	0.96237	8147	2	-4.1995	0.034377	0.039241	0.994321	846	1	-4.1995
Fgf12	6	0.81055	0.9069	1	17672	2	-5.7114	0.03441	0.042417	0.994321	847	1	-5.7114
LOC100751762	6	0.35283	0.62329	1	12259	2	-2.8939	0.034458	0.042454	0.994321	848	1	-2.8939
Sfrp2	6	0.35711	0.62647	1	12328	3	-4.9098	0.034507	0.042498	0.994321	849	1	-4.9098
Kpna2	6	0.79064	0.89768	1	17439	2	-5.598	0.034555	0.042536	0.994321	850	1	-5.598
Zfp41	6	0.12111	0.31981	0.925502	7170	4	-5.3375	0.034603	0.042576	0.994321	851	1	-5.3375
Msgn1	6	0.45643	0.69982	1	13586	3	-4.7915	0.034652	0.042619	0.994321	852	1	-4.7915
LOC100765480	6	0.44712	0.69303	1	13468	2	-4.9504	0.034748	0.042714	0.994321	853	1	-4.9504
Slc2a3	6	0.074007	0.22206	0.835726	5493	3	-4.5402	0.034893	0.042843	0.994321	854	1	-4.5402
Bsdc1	6	0.43266	0.68236	1	13290	3	-3.95	0.03499	0.042927	0.994321	855	1	-3.95
Dsc1	6	0.20763	0.44516	1	9252	2	-4.608	0.035135	0.043067	0.994321	856	1	-4.608
Znf569	5	0.97753	0.97763	1	20046	0	-5.6427	0.035144	0.039946	0.994321	857	1	-5.6427
Fam219a	6	0.23606	0.48318	1	9890	3	-3.2775	0.035183	0.043107	0.994321	858	1	-3.2775
LOC100758957	6	0.052614	0.16953	0.769808	4531	4	-4.5431	0.035232	0.043158	0.994321	859	1	-4.5431
Brms1l	6	0.97994	0.98029	1	20141	1	-4.5564	0.03528	0.043201	0.994321	860	1	-4.5564
Casq2	6	0.35499	0.62489	1	12304	3	-6.5282	0.035473	0.043368	0.994321	861	1	-6.5282
LOC100764892	6	0.64013	0.83197	1	16005	3	-6.3891	0.035521	0.043404	0.994321	862	1	-6.3891
Ltbp3	6	0.044996	0.14993	0.743019	4164	1	-3.4583	0.03557	0.043457	0.994321	863	1	-3.4583
Zc3h11a	4	0.83419	0.86813	1	17925	1	-4.4594	0.035663	0.038229	0.994321	864	1	-4.4594
Trpc4	6	0.12812	0.33051	0.933666	7357	2	-4.2529	0.035715	0.043581	0.994321	865	1	-4.2529
S100a4	6	0.98197	0.98204	1	20231	1	-4.4021	0.035859	0.043714	0.994321	866	1	-4.4021
Rbm34	6	0.098455	0.27797	0.884023	6497	3	-4.1646	0.035908	0.043752	0.994321	867	1	-4.1646
Rnd3	5	0.04515	0.14204	0.730884	4171	2	-6.4022	0.035949	0.040705	0.994321	868	1	-6.4022
LOC100763656	6	0.03528	0.12397	0.698219	3670	3	-5.3667	0.035956	0.0438	0.994321	869	1	-5.3667
LOC100757782	4	0.9995	0.99951	1	21576	0	-4.2494	0.03605	0.038588	0.994321	870	1	-4.2494
Ccnd2	6	0.79718	0.90066	1	17506	2	-5.2307	0.036052	0.043881	0.994321	871	1	-5.2307
Fam184b	6	0.77754	0.89189	1	17299	1	-5.7328	0.036101	0.043927	0.994321	872	1	-5.7328
Slc5a8	6	0.23476	0.4815	1	9861	2	-5.5911	0.036149	0.043966	0.994321	873	1	-5.5911
LOC100752389	6	0.0018349	0.0091506	0.302053	634	5	-4.5064	0.036197	0.044008	0.994321	874	1	-4.5064
Bbs7	6	0.3696	0.63576	1	12489	2	-4.3173	0.036246	0.044041	0.994321	875	1	-4.3173
Htra2	6	0.25969	0.51394	1	10451	1	-5.1368	0.036487	0.044269	0.994321	876	1	-5.1368
Pitx1	6	0.10636	0.29523	0.900912	6786	4	-4.6795	0.036583	0.044362	0.994321	877	1	-4.6795
LOC100771290	6	0.86737	0.9355	1	18382	1	-4.969	0.036632	0.0444	0.994321	878	1	-4.969
Idh1	5	0.81987	0.90342	1	17767	1	-5.053	0.036674	0.041374	0.994321	879	1	-5.053
Ptcd1	6	0.56629	0.77945	1	15059	3	-6.7696	0.03668	0.044442	0.994321	880	1	-6.7696
Clcn5	6	0.064202	0.19848	0.81111	5052	3	-4.5371	0.036728	0.044487	0.994321	881	1	-4.5371
Dcc	6	0.63232	0.8265	1	15904	2	-4.8815	0.036776	0.044545	0.994321	882	1	-4.8815
Rpap1	6	0.6463	0.83633	1	16086	1	-4.9012	0.036825	0.04459	0.994321	883	1	-4.9012
LOC100756074	5	0.99736	0.99735	1	21183	0	-4.5624	0.036835	0.041526	0.994321	884	1	-4.5624
Tldc2	6	0.23501	0.48181	1	9868	4	-5.8769	0.036873	0.04463	0.994321	885	1	-5.8769
Cers2	6	0.72417	0.86942	1	16764	2	-6.9074	0.036921	0.044669	0.994321	886	1	-6.9074
Idua	6	0.88404	0.94472	1	18636	2	-3.2467	0.036969	0.044713	0.994321	887	1	-3.2467
Sertad1	6	0.0012513	0.0063121	0.27063	487	5	-4.0294	0.037017	0.044767	0.994321	888	1	-4.0294
Eva1a	6	0.062029	0.19314	0.805907	4949	5	-5.6417	0.037066	0.044816	0.994321	889	1	-5.6417
Gldc	6	0.54249	0.7623	1	14740	2	-5.4072	0.037114	0.044857	0.994321	890	1	-5.4072
Itpkc	6	0.21834	0.45966	1	9497	4	-4.7665	0.037162	0.04489	0.994321	891	1	-4.7665
Hsd17b13	6	0.35946	0.62821	1	12365	3	-5.9049	0.03721	0.044934	0.994321	892	1	-5.9049
Baz2b	6	0.20109	0.43612	1	9102	3	-6.0282	0.037259	0.044981	0.994321	893	1	-6.0282
LOC100757792	6	0.0041292	0.01977	0.370472	1110	5	-3.732	0.037307	0.045023	0.994321	894	1	-3.732
LOC100775032	6	0.26975	0.52681	1	10658	4	-5.9431	0.037355	0.045074	0.994321	895	1	-5.9431
LOC100770956	4	0.98014	0.98013	1	20153	0	-3.3438	0.037438	0.039909	0.994321	896	1	-3.3438
Prrt3	6	0.029004	0.10636	0.662166	3329	5	-4.639	0.037596	0.04528	0.994321	897	1	-4.639
Prdm12	6	0.016091	0.068446	0.568879	2496	3	-5.5831	0.037693	0.045366	0.994321	898	1	-5.5831
Ackr1	6	0.18071	0.4077	0.990771	8621	3	-6.3241	0.037885	0.045536	0.994321	899	1	-6.3241
LOC100772892	6	0.3489	0.62036	1	12212	2	-6.49	0.037982	0.045625	0.994321	900	1	-6.49
Gmcl1	6	0.10771	0.29811	0.903614	6835	3	-3.3334	0.03803	0.045668	0.994321	901	1	-3.3334
LOC100761590	5	0.13796	0.32647	0.930783	7606	3	-5.4491	0.038042	0.042611	0.994321	902	1	-5.4491
LOC100758063	6	0.15592	0.37204	0.967462	8030	3	-5.7059	0.038126	0.045765	0.994321	903	1	-5.7059
Mcf2l	6	0.26255	0.51765	1	10518	4	-3.9464	0.038223	0.045848	0.994321	904	1	-3.9464
Plagl2	6	0.96351	0.97014	1	19667	1	-3.945	0.038271	0.04589	0.994321	905	1	-3.945
Pcdh17	6	0.073362	0.2205	0.834643	5466	4	-5.1055	0.038415	0.046015	0.994321	906	1	-5.1055
Cbln4	6	0.52003	0.74613	1	14411	3	-5.8481	0.038512	0.046101	0.994321	907	1	-5.8481
Mccc1	6	0.0095921	0.043239	0.494134	1835	2	-2.7259	0.03856	0.046142	0.994321	908	1	-2.7259
Ppp1r7	5	0.9865	0.98649	1	20438	0	-5.785	0.038565	0.043052	0.994321	909	1	-5.785
Senp8	6	0.89781	0.94996	1	18792	1	-4.3007	0.038608	0.046179	0.994321	910	1	-4.3007
Ccdc3	6	0.35807	0.62717	1	12343	3	-5.2483	0.038704	0.04626	0.994321	911	1	-5.2483
Slc9a5	6	0.046141	0.15294	0.747903	4215	5	-6.3821	0.038801	0.046341	0.994321	912	1	-6.3821
LOC100765228	5	0.20952	0.43516	1	9295	3	-5.6163	0.038806	0.043285	0.994321	913	1	-5.6163
Bgn	6	0.1073	0.29722	0.902896	6818	5	-6.4491	0.038897	0.046427	0.994321	914	1	-6.4491
Apold1	6	0.82379	0.91319	1	17816	2	-4.2879	0.038945	0.046471	0.994321	915	1	-4.2879
LOC100772035	6	0.86484	0.93414	1	18345	2	-3.6334	0.039041	0.046553	0.994321	916	1	-3.6334
LOC100768300	5	0.30783	0.53838	1	11439	1	-6.2165	0.039047	0.043512	0.994321	917	1	-6.2165
Gmnn	5	0.9893	0.98933	1	20606	0	-4.3649	0.039167	0.043626	0.994321	918	1	-4.3649
Slc20a2	6	0.0023183	0.011454	0.315271	764	5	-5.8178	0.039234	0.04673	0.994321	919	1	-5.8178
Tmem206	6	0.075989	0.2268	0.840022	5581	3	-5.3209	0.03933	0.046805	0.994321	920	1	-5.3209
Zbtb16	6	0.041014	0.13946	0.727013	3961	1	-2.1534	0.039378	0.046843	0.994321	921	1	-2.1534
Tnfaip8l2	6	0.086193	0.25035	0.862542	5994	2	-4.0316	0.039427	0.046889	0.994321	922	1	-4.0316
Lipg	6	0.38594	0.64784	1	12684	3	-5.1306	0.039475	0.046937	0.994321	923	1	-5.1306
Anxa11	6	0.030452	0.11043	0.66944	3414	5	-5.8452	0.039523	0.046977	0.994321	924	1	-5.8452
Gtsf1	6	0.29486	0.55816	1	11179	4	-6.4998	0.039571	0.047021	0.994321	925	1	-6.4998
Tmem104	6	0.99362	0.99356	1	20857	0	-5.4774	0.039619	0.047065	0.994321	926	1	-5.4774
Acad11	6	0.018795	0.076554	0.591818	2686	3	-5.8377	0.039667	0.047111	0.994321	927	1	-5.8377
LOC100770395	6	0.29778	0.56174	1	11243	3	-5.4402	0.039715	0.047153	0.994321	928	1	-5.4402
Ppp1r3b	5	0.20935	0.43498	1	9293	3	-5.4211	0.03973	0.044153	0.994321	929	1	-5.4211
Eci1	6	0.87399	0.93913	1	18485	2	-5.3084	0.039763	0.04719	0.994321	930	1	-5.3084
LOC100764723	6	0.22527	0.46896	1	9633	4	-3.4951	0.039811	0.04724	0.994321	931	1	-3.4951
Mlxip	6	0.93952	0.96062	1	19237	1	-5.8876	0.03986	0.047279	0.994321	932	1	-5.8876
CTRL00400	1	0.9601	0.96023	1	19599	0	-0.24965	0.039904	0.039802	0.994321	933	0	-0.24965
Ccl17	6	0.6862	0.85444	1	16443	2	-3.5766	0.039908	0.04732	0.994321	934	1	-3.5766
Tyw3	5	0.033899	0.11648	0.681341	3606	4	-6.1622	0.03993	0.044345	0.994321	935	1	-6.1622
L3mbtl1	6	0.31377	0.58113	1	11572	3	-5.0741	0.039956	0.047365	0.994321	936	1	-5.0741
Dcun1d5	3	0.99937	0.99937	1	21531	0	-1.7815	0.039981	0.040663	0.994321	937	1	-1.7815
Ttc21b	6	0.91816	0.95463	1	18976	1	-5.7201	0.040004	0.047412	0.994321	938	1	-5.7201
Gdpgp1	6	0.38182	0.64481	1	12644	3	-6.4017	0.040052	0.047458	0.994321	939	1	-6.4017
Hsd17b8	6	0.24467	0.49447	1	10090	3	-3.682	0.0401	0.047503	0.994321	940	1	-3.682
Dmgdh	6	0.28848	0.55029	1	11032	4	-4.4189	0.040196	0.047597	0.994321	941	1	-4.4189
LOC107979086	6	0.63138	0.82584	1	15884	2	-5.2079	0.040244	0.04764	0.994321	942	1	-5.2079
LOC100765012	6	0.63709	0.82985	1	15959	3	-6.2547	0.040341	0.04773	0.994321	943	1	-6.2547
Kiaa2012	6	0.068572	0.20906	0.820907	5260	4	-5.7386	0.040389	0.047778	0.994321	944	1	-5.7386
Ruvbl1	6	0.99952	0.99951	1	21587	0	-3.4697	0.040437	0.047827	0.994321	945	1	-3.4697
Tprkb	4	0.99561	0.99561	1	21013	0	-3.812	0.040497	0.042721	0.994321	946	1	-3.812
Fam229b	6	0.54792	0.7662	1	14813	3	-5.8919	0.040533	0.047913	0.994321	947	1	-5.8919
Angptl4	6	0.066943	0.2051	0.817239	5179	4	-5.7435	0.040581	0.047955	0.994321	948	1	-5.7435
Ivns1abp	6	0.82284	0.91274	1	17804	2	-2.3118	0.040629	0.04801	0.994321	949	1	-2.3118
Znf385a	6	0.04786	0.15737	0.753872	4301	4	-6.8958	0.040821	0.048184	0.994321	950	1	-6.8958
LOC100761504	6	0.038538	0.13282	0.717661	3812	4	-4.0741	0.04087	0.048229	0.994321	951	1	-4.0741
LOC100765759	6	0.8551	0.92902	1	18209	2	-5.0575	0.040918	0.048268	0.994321	952	1	-5.0575
Tvp23b	5	0.72895	0.8484	1	16808	2	-5.4273	0.040934	0.045265	0.994321	953	1	-5.4273
Rasl11b	6	0.022979	0.088967	0.625136	2953	5	-4.5698	0.040966	0.048311	0.994321	954	1	-4.5698
LOC100763430	5	0.94189	0.94827	1	19272	1	-4.695	0.041054	0.045384	0.994321	955	1	-4.695
Prodh2	6	0.05284	0.17009	0.770554	4542	5	-5.3444	0.041062	0.048394	0.994321	956	1	-5.3444
Fez1	6	0.53882	0.75964	1	14671	3	-6.244	0.041158	0.048476	0.994321	957	1	-6.244
Oxtr	6	0.00025941	0.001384	0.162149	183	5	-3.3121	0.041206	0.048515	0.994321	958	1	-3.3121
Hspb8	6	0.0015828	0.0079358	0.290844	570	5	-6.0009	0.041254	0.048555	0.994321	959	1	-6.0009
Cabp2	6	0.95554	0.96653	1	19502	1	-5.747	0.04135	0.048638	0.994321	960	1	-5.747
Strbp	6	0.51672	0.74369	1	14362	1	-5.5068	0.041398	0.048674	0.994321	961	1	-5.5068
Hspb3	6	0.8406	0.92159	1	18007	1	-6.0255	0.041446	0.048714	0.994321	962	1	-6.0255
LOC100768264	6	0.11804	0.31508	0.920169	7103	2	-5.1942	0.041542	0.048802	0.994321	963	1	-5.1942
LOC103162876	6	0.13846	0.34622	0.944148	7615	3	-5.5585	0.04159	0.048843	0.994321	964	1	-5.5585
LOC103164550	6	0.81715	0.90997	1	17737	1	-5.9464	0.041638	0.048875	0.994321	965	1	-5.9464
Slc16a8	6	0.57678	0.78704	1	15188	2	-6.2004	0.041686	0.048915	0.994321	966	1	-6.2004
LOC100766137	6	0.47366	0.71239	1	13809	3	-5.0871	0.041782	0.049014	0.994321	967	1	-5.0871
Sypl2	6	0.17772	0.4034	0.987949	8562	3	-4.2675	0.04183	0.049051	0.994321	968	1	-4.2675
Casp1	6	0.057619	0.18217	0.786029	4770	3	-5.129	0.041879	0.04909	0.994321	969	1	-5.129
Btla	6	0.84916	0.92594	1	18115	2	-4.8435	0.041927	0.049131	0.994321	970	1	-4.8435
Smoc1	6	0.072442	0.21832	0.831591	5429	3	-5.9214	0.042119	0.049304	0.994321	971	1	-5.9214
Phf8	6	0.20443	0.44074	1	9189	3	-5.9471	0.042167	0.049356	0.994321	972	1	-5.9471
Ptgfrn	6	0.20893	0.44701	1	9283	3	-5.3065	0.042215	0.049394	0.994321	973	1	-5.3065
Mbtd1	5	0.99805	0.99806	1	21280	0	-5.5573	0.042256	0.046454	0.994321	974	1	-5.5573
LOC100757380	6	0.80795	0.90563	1	17649	2	-2.5423	0.042263	0.049443	0.994321	975	1	-2.5423
LOC100758625	6	0.017487	0.072624	0.579852	2590	5	-5.2521	0.042311	0.049493	0.994321	976	1	-5.2521
Gnrh1	6	0.9781	0.97887	1	20063	1	-5.0236	0.042359	0.049526	0.994321	977	1	-5.0236
Adora2b	6	0.052432	0.16906	0.769725	4517	3	-5.0283	0.042407	0.049568	0.994321	978	1	-5.0283
LOC100772389	6	0.096395	0.27345	0.88102	6411	3	-2.9153	0.042503	0.049667	0.994321	979	1	-2.9153
Tmem219	6	0.092271	0.26414	0.874939	6231	2	-5.6374	0.042599	0.04976	0.994321	980	1	-5.6374
Nrk	5	0.98824	0.98822	1	20534	0	-5.9775	0.042617	0.046781	0.994321	981	1	-5.9775
LOC100765152	6	0.82761	0.91507	1	17852	1	-5.5733	0.042647	0.049794	0.994321	982	1	-5.5733
Zcchc11	6	0.62851	0.82382	1	15853	3	-4.2755	0.042695	0.049841	0.994321	983	1	-4.2755
Myo3a	5	0.4124	0.64196	1	13008	2	-0.5592	0.042737	0.046897	0.994321	984	1	-0.5592
Sgk1	6	0.12802	0.33037	0.933572	7355	4	-5.6147	0.042791	0.049924	0.994321	985	1	-5.6147
Pced1a	6	0.50793	0.73732	1	14250	3	-6.7045	0.042839	0.049965	0.994321	986	1	-6.7045
Ces1	6	0.91714	0.95436	1	18966	1	-4.9053	0.042887	0.050008	0.994321	987	1	-4.9053
Cnst	6	0.8331	0.91779	1	17917	2	-4.5298	0.042935	0.050056	0.994321	988	1	-4.5298
LOC107980308	6	0.74968	0.87981	1	17018	1	-5.7336	0.043079	0.050184	0.994321	989	1	-5.7336
LOC100762854	6	0.20648	0.44354	1	9225	3	-4.0802	0.043127	0.050225	0.994321	990	1	-4.0802
Helz2	6	0.71212	0.8646	1	16665	2	-5.1522	0.043175	0.050264	0.994321	991	1	-5.1522
LOC103161035	4	0.63722	0.77392	1	15966	1	-3.9519	0.043228	0.045237	0.994321	992	1	-3.9519
Shroom3	6	0.029518	0.10779	0.665233	3355	4	-5.2171	0.04327	0.050347	0.994321	993	1	-5.2171
LOC100772955	5	0.9737	0.97375	1	19937	0	-4.4252	0.043338	0.047447	0.994321	994	1	-4.4252
Ap5s1	6	0.012899	0.056475	0.537494	2193	5	-5.476	0.043366	0.05043	0.994321	995	1	-5.476
LOC100759281	6	0.34761	0.61941	1	12193	3	-5.3741	0.043414	0.050474	0.994321	996	1	-5.3741
LOC103164574	6	0.073522	0.22088	0.835268	5471	5	-4.6236	0.043462	0.050518	0.994321	997	1	-4.6236
Tsc22d2	6	0.8815	0.94328	1	18596	2	-3.6315	0.04351	0.050566	0.994321	998	1	-3.6315
Itfg2	6	0.14175	0.35117	0.948914	7701	3	-2.2398	0.043558	0.050615	0.994321	999	1	-2.2398
Myo1e	6	0.64769	0.83731	1	16101	3	-5.5624	0.043606	0.050654	0.994321	1000	1	-5.5624
Cd55	5	0.94424	0.94971	1	19300	1	-4.9168	0.043618	0.047703	0.994321	1001	1	-4.9168
Csf3r	6	0.62796	0.82345	1	15842	3	-3.705	0.043654	0.050695	0.994321	1002	1	-3.705
Ak8	6	0.075279	0.22511	0.83751	5556	5	-2.5246	0.043702	0.050736	0.994321	1003	1	-2.5246
Scn7a	5	0.97353	0.97358	1	19931	0	-4.3918	0.043738	0.04782	0.994321	1004	1	-4.3918
Hspa9	4	0.99997	0.99997	1	21839	0	-3.062	0.043742	0.045723	0.994321	1005	1	-3.062
Mrc2	6	0.65943	0.84442	1	16222	2	-5.9831	0.043894	0.050894	0.994321	1006	1	-5.9831
Sel1l3	6	0.59156	0.79772	1	15349	2	-5.7349	0.043942	0.050931	0.994321	1007	1	-5.7349
Hmgn3	6	0.33512	0.60641	1	11982	2	-3.1802	0.04399	0.050973	0.994321	1008	1	-3.1802
LOC100756022	6	0.11138	0.30481	0.911572	6938	2	-5.6154	0.044086	0.051054	0.994321	1009	1	-5.6154
LOC100761069	6	0.32717	0.59712	1	11825	2	-0.97246	0.044229	0.051182	0.994321	1010	1	-0.97246
Palm	6	0.0083555	0.038004	0.473242	1681	5	-5.1502	0.044277	0.051221	0.994321	1011	1	-5.1502
Rangrf	6	0.17337	0.39719	0.983763	8454	4	-4.9869	0.044373	0.051303	0.994321	1012	1	-4.9869
LOC100759710	6	0.41042	0.666	1	12987	1	-4.8302	0.044421	0.051354	0.994321	1013	1	-4.8302
Nek8	6	0.30641	0.57224	1	11412	2	-6.4919	0.044469	0.051396	0.994321	1014	1	-6.4919
Msrb3	6	0.30841	0.57467	1	11450	2	-3.769	0.044517	0.051446	0.994321	1015	1	-3.769
Rgs20	6	0.031337	0.11293	0.675007	3458	5	-6.8037	0.044565	0.051489	0.994321	1016	1	-6.8037
Trim44	6	0.36298	0.63084	1	12407	3	-4.14	0.044613	0.051527	0.994321	1017	1	-4.14
LOC100756347	6	0.0005293	0.0027809	0.211374	276	5	-4.2842	0.044661	0.05157	0.994321	1018	1	-4.2842
Irak2	6	0.0025108	0.012355	0.321482	810	5	-4.2602	0.044709	0.051613	0.994321	1019	1	-4.2602
Rbpjl	6	0.10331	0.28859	0.893409	6681	4	-6.3874	0.044757	0.051658	0.994321	1020	1	-6.3874
LOC107977648	4	0.99876	0.99876	1	21392	0	-2.5035	0.0448	0.046729	0.994321	1021	1	-2.5035
Terf2	6	0.99875	0.99874	1	21386	0	-5.5705	0.044804	0.051703	0.994321	1022	1	-5.5705
Mfsd1	6	0.70007	0.8598	1	16563	2	-5.4666	0.044852	0.051744	0.994321	1023	1	-5.4666
Pou2f1	6	0.3747	0.6395	1	12549	3	-5.5196	0.0449	0.051782	0.994321	1024	1	-5.5196
Coro2b	6	0.94626	0.9629	1	19331	1	-2.3592	0.044948	0.051824	0.994321	1025	1	-2.3592
Sorbs1	6	0.21828	0.4596	1	9494	3	-4.9694	0.044996	0.051866	0.994321	1026	1	-4.9694
LOC100757319	5	0.2212	0.4476	1	9551	3	-3.7833	0.045098	0.049077	0.994321	1027	1	-3.7833
Mgme1	6	0.46327	0.70479	1	13662	3	-6.0278	0.045188	0.052035	0.994321	1028	1	-6.0278
Fbxl15	6	0.35605	0.62567	1	12317	2	-4.3447	0.045236	0.052078	0.994321	1029	1	-4.3447
A3galt2	6	1.11e-06	6.1e-06	0.013366	10	5	-3.8072	0.045283	0.052114	0.994321	1030	1	-3.8072
Gal	6	0.032701	0.11675	0.681712	3545	4	-5.7903	0.045331	0.052147	0.994321	1031	1	-5.7903
Traf3ip2	6	0.50645	0.73627	1	14230	2	-6.1371	0.045379	0.052186	0.994321	1032	1	-6.1371
Jam3	5	0.24389	0.47176	1	10069	3	-4.949	0.045458	0.049415	0.994321	1033	1	-4.949
LOC107977730	6	0.84515	0.9239	1	18073	2	-4.7587	0.045523	0.052308	0.994321	1034	1	-4.7587
Atp5h	6	0.85561	0.9293	1	18218	1	-6.0008	0.045571	0.05235	0.994321	1035	1	-6.0008
LOC100761901	5	0.01162	0.045404	0.502144	2046	4	-4.0554	0.045617	0.049558	0.994321	1036	1	-4.0554
Carm1	6	0.9616	0.96923	1	19628	1	-3.9879	0.045619	0.052391	0.994321	1037	1	-3.9879
Klhl7	5	0.091512	0.23922	0.85233	6204	3	-4.1096	0.045657	0.049598	0.994321	1038	1	-4.1096
Tas2r41	6	0.14373	0.35414	0.952377	7748	4	-5.7936	0.045666	0.052435	0.994321	1039	1	-5.7936
Mettl25	6	0.17074	0.3935	0.98023	8397	4	-5.2487	0.045714	0.052478	0.994321	1040	1	-5.2487
Aldh5a1	6	0.38372	0.64619	1	12663	3	-5.3382	0.045762	0.052517	0.994321	1041	1	-5.3382
Wnt9a	6	0.10976	0.30227	0.908793	6897	4	-5.9197	0.04581	0.05256	0.994321	1042	1	-5.9197
Rhod	6	0.30355	0.56876	1	11367	4	-3.2535	0.045858	0.052599	0.994321	1043	1	-3.2535
LOC100772401	6	0.97939	0.97986	1	20122	1	-5.1597	0.045906	0.052639	0.994321	1044	1	-5.1597
Cnnm4	6	0.61735	0.81598	1	15686	3	-3.79	0.045954	0.052688	0.994321	1045	1	-3.79
Top1mt	5	0.29194	0.52206	1	11115	3	-5.8984	0.046017	0.049927	0.994321	1046	1	-5.8984
Tgfbr3	6	0.27756	0.53663	1	10806	4	-6.2812	0.046049	0.05278	0.994321	1047	1	-6.2812
Limd2	6	0.10714	0.2969	0.902387	6813	3	-4.8995	0.046193	0.052904	0.994321	1048	1	-4.8995
LOC100766443	6	0.58547	0.79333	1	15282	3	-5.142	0.046241	0.05294	0.994321	1049	1	-5.142
LOC100760524	6	0.19326	0.42529	0.998473	8935	2	-5.0667	0.046289	0.052982	0.994321	1050	1	-5.0667
Mcu	6	0.98382	0.98377	1	20308	1	-5.9328	0.046336	0.053017	0.994321	1051	1	-5.9328
CTRLX00419	1	0.95363	0.95373	1	19456	0	-1.767	0.04637	0.04637	0.994321	1052	0	-1.767
LOC100768807	6	0.71892	0.8673	1	16721	2	-6.3545	0.046432	0.053105	0.994321	1053	1	-6.3545
Col6a1	6	0.71817	0.86699	1	16712	2	-4.3534	0.04648	0.053143	0.994321	1054	1	-4.3534
Trim25	6	0.12294	0.32263	0.928908	7201	4	-5.5	0.046528	0.053195	0.994321	1055	1	-5.5
Etv3	4	0.12634	0.27763	0.883594	7303	3	-2.5578	0.046562	0.048353	0.994321	1056	1	-2.5578
Baz2a	6	0.051355	0.16632	0.765836	4469	3	-5.9836	0.046576	0.053237	0.994321	1057	1	-5.9836
CTRLX11495	1	0.9534	0.95351	1	19452	0	-1.4396	0.046598	0.046593	0.994321	1058	0	-1.4396
Sgsm3	6	0.24097	0.48962	1	9998	4	-5.8694	0.046623	0.053283	0.994321	1059	1	-5.8694
LOC100764333	5	0.38109	0.61152	1	12631	2	-4.9748	0.046656	0.050512	0.994321	1060	1	-4.9748
LOC103160018	6	0.45578	0.69936	1	13579	2	-3.2441	0.046719	0.053364	0.994321	1061	1	-3.2441
Tmem218	6	0.99334	0.99328	1	20840	0	-3.6572	0.046767	0.053401	0.994321	1062	1	-3.6572
Tmem216	6	0.99693	0.99692	1	21127	0	-3.977	0.046863	0.053493	0.994321	1063	1	-3.977
Tmem107	6	0.093206	0.26624	0.87525	6274	3	-5.7968	0.04691	0.053538	0.994321	1064	1	-5.7968
Pacsin1	6	0.18944	0.41996	0.995756	8836	4	-5.7448	0.047006	0.053623	0.994321	1065	1	-5.7448
Fam83e	6	0.35402	0.62417	1	12279	3	-5.9349	0.047054	0.05366	0.994321	1066	1	-5.9349
Nek5	6	0.87186	0.93794	1	18457	2	-3.7971	0.047102	0.053706	0.994321	1067	1	-3.7971
Smim6	6	0.87605	0.94025	1	18517	2	-3.5	0.047149	0.053749	0.994321	1068	1	-3.5
C1qtnf5	6	0.05486	0.17517	0.777856	4630	4	-4.3112	0.047197	0.053787	0.994321	1069	1	-4.3112
CTRLX09600	1	0.95277	0.95291	1	19441	0	-1.8241	0.047228	0.047228	0.994321	1070	0	-1.8241
Cbr3	6	0.13146	0.33569	0.935968	7457	3	-6.063	0.047245	0.053827	0.994321	1071	1	-6.063
Irf5	6	0.013338	0.058189	0.540861	2236	5	-5.2333	0.047293	0.053864	0.994321	1072	1	-5.2333
Clstn3	6	0.5121	0.74033	1	14304	3	-4.7417	0.047341	0.053905	0.994321	1073	1	-4.7417
LOC100773157	6	0.19234	0.424	0.998315	8906	4	-4.6909	0.047388	0.053952	0.994321	1074	1	-4.6909
Numa1	6	0.4337	0.68314	1	13315	2	-6.0237	0.047436	0.05399	0.994321	1075	1	-6.0237
LOC100767729	5	0.68507	0.82258	1	16431	2	-5.897	0.047454	0.051265	0.994321	1076	1	-5.897
Usp2	6	0.14318	0.35333	0.951362	7738	4	-6.4699	0.047532	0.054076	0.994321	1077	1	-6.4699
Cdadc1	5	0.96712	0.96735	1	19752	1	-3.6217	0.047534	0.05134	0.994321	1078	1	-3.6217
Rnh1	6	0.41753	0.67128	1	13071	3	-4.8867	0.04758	0.054122	0.994321	1079	1	-4.8867
Itgb8	5	0.00086756	0.0039002	0.233698	382	4	-6.0858	0.047613	0.051424	0.994321	1080	1	-6.0858
Sema7a	6	0.48906	0.72366	1	14004	3	-5.2507	0.047627	0.05416	0.994321	1081	1	-5.2507
Orc5	6	0.98711	0.98704	1	20468	0	-2.226	0.047675	0.054198	0.994321	1082	1	-2.226
Gpr149	5	0.22968	0.45668	1	9743	3	-6.1705	0.047733	0.051533	0.994321	1083	1	-6.1705
LOC100765610	6	0.04464	0.149	0.742605	4142	4	-5.4956	0.047771	0.054289	0.994321	1084	1	-5.4956
LOC100756627	5	0.20318	0.42828	1	9152	2	-4.8275	0.047813	0.0516	0.994321	1085	1	-4.8275
Tmem55a	6	0.57917	0.78877	1	15211	3	-5.7667	0.047819	0.054335	0.994321	1086	1	-5.7667
Sfxn5	6	0.12427	0.32463	0.929155	7247	4	-4.4395	0.047866	0.054385	0.994321	1087	1	-4.4395
Prepl	6	0.86066	0.93197	1	18286	1	-4.2612	0.047962	0.054474	0.994321	1088	1	-4.2612
Mbnl3	6	0.57447	0.78538	1	15159	3	-6.111	0.04801	0.05451	0.994321	1089	1	-6.111
LOC107980143	6	0.50713	0.73677	1	14241	3	-5.7195	0.048057	0.054549	0.994321	1090	1	-5.7195
LOC100770995	6	0.30572	0.57138	1	11405	4	-6.3742	0.048105	0.054596	0.994321	1091	1	-6.3742
Clec4d	6	0.28944	0.55147	1	11058	3	-4.5742	0.048153	0.054638	0.994321	1092	1	-4.5742
Map7d2	5	0.84897	0.91103	1	18113	1	-5.7459	0.048172	0.051954	0.994321	1093	1	-5.7459
Centrin-2	6	0.41854	0.67205	1	13087	3	-4.7671	0.048201	0.054684	0.994321	1094	1	-4.7671
Fbxl3	6	0.32117	0.59004	1	11721	2	-5.1891	0.048248	0.054723	0.994321	1095	1	-5.1891
Ppp1r37	6	0.044502	0.14864	0.742605	4130	5	-4.6013	0.048296	0.05477	0.994321	1096	1	-4.6013
CTRLX09499	1	0.95165	0.9518	1	19423	0	-0.25176	0.048348	0.048379	0.994321	1097	0	-0.25176
Usp9x	6	0.89698	0.94979	1	18783	1	-2.1016	0.048392	0.054854	0.994321	1098	1	-2.1016
CTRLX12967	1	0.95157	0.95171	1	19421	0	-0.84508	0.048431	0.048459	0.994321	1099	0	-0.84508
LOC100768249	5	0.33836	0.56931	1	12044	3	-6.2386	0.048451	0.052205	0.994321	1100	1	-6.2386
Cuedc1	6	0.79891	0.90144	1	17526	2	-6.1162	0.048487	0.054946	0.994321	1101	1	-6.1162
Magt1	5	0.62535	0.78899	1	15807	2	-3.3762	0.048491	0.052243	0.994321	1102	1	-3.3762
LOC107977518	6	0.36996	0.63601	1	12492	2	-6.3055	0.048535	0.054991	0.994321	1103	1	-6.3055
Gclm	5	0.82731	0.90525	1	17848	1	-2.498	0.04857	0.052316	0.994321	1104	1	-2.498
LOC100765650	6	0.35479	0.62474	1	12298	3	-4.9616	0.048583	0.055031	0.994321	1105	1	-4.9616
Tcea2	6	0.023429	0.090309	0.629344	2978	5	-6.3126	0.048678	0.055117	0.994321	1106	1	-6.3126
LOC100760753	5	0.35299	0.58379	1	12263	1	-4.0904	0.04869	0.052413	0.994321	1107	1	-4.0904
Tjap1	6	0.42249	0.67501	1	13151	2	-6.2081	0.048726	0.055153	0.994321	1108	1	-6.2081
Camk1	6	0.47792	0.71548	1	13857	3	-5.8199	0.048774	0.055197	0.994321	1109	1	-5.8199
LOC100756540	3	0.69208	0.74337	1	16499	1	-5.207	0.048793	0.04929	0.994321	1110	1	-5.207
Lrrc1	6	0.4099	0.66562	1	12975	3	-4.7427	0.048821	0.055234	0.994321	1111	1	-4.7427
Arhgap19	6	0.9646	0.97068	1	19697	1	-4.4226	0.048869	0.055275	0.994321	1112	1	-4.4226
Pcolce	5	0.32233	0.55306	1	11738	3	-3.6949	0.048889	0.052598	0.994321	1113	1	-3.6949
Tmem127	6	0.014432	0.06244	0.550944	2353	5	-6.2156	0.048965	0.055358	0.994321	1114	1	-6.2156
LOC103162815	3	0.31508	0.46857	1	11603	1	-4.0138	0.048986	0.049493	0.994321	1115	1	-4.0138
Wbscr22	6	0.77223	0.88957	1	17244	2	-3.7158	0.049012	0.055404	0.994321	1116	1	-3.7158
LOC100757839	6	0.012521	0.054978	0.533873	2144	5	-4.6451	0.049108	0.055494	0.994321	1117	1	-4.6451
LOC100769330	5	0.79444	0.88963	1	17483	2	-5.7985	0.049128	0.052808	0.994321	1118	1	-5.7985
Hspa12b	6	0.98698	0.98691	1	20463	0	-5.8918	0.049251	0.055619	0.994321	1119	1	-5.8918
Slc25a53	6	0.011674	0.051616	0.524755	2059	3	-5.3249	0.049299	0.055654	0.994321	1120	1	-5.3249
LOC100767654	6	0.9971	0.99709	1	21148	0	-4.4221	0.049346	0.055693	0.994321	1121	1	-4.4221
Tas2r4	6	0.46298	0.70456	1	13659	3	-3.9632	0.049394	0.055737	0.994321	1122	1	-3.9632
LOC100773178	4	0.99996	0.99996	1	21829	0	-2.8771	0.049472	0.051094	0.994321	1123	1	-2.8771
Tcp11	6	0.60708	0.80871	1	15556	3	-5.1059	0.04949	0.055815	0.994321	1124	1	-5.1059
LOC107977042	6	0.82638	0.91447	1	17841	1	-5.083	0.049537	0.055861	0.994321	1125	1	-5.083
Ntrk1	6	0.11293	0.30721	0.914457	6977	4	-2.7359	0.049585	0.055899	0.994321	1126	1	-2.7359
LOC100767355	6	0.85738	0.93024	1	18247	2	-5.5314	0.049633	0.055943	0.994321	1127	1	-5.5314
Ebag9	4	0.28857	0.50335	1	11037	3	-4.5274	0.049696	0.051307	0.994321	1128	1	-4.5274
Rnf8	6	0.038732	0.13333	0.717661	3832	4	-5.6332	0.049728	0.056037	0.994321	1129	1	-5.6332
Tead1	6	0.71614	0.86619	1	16697	2	-3.4608	0.049776	0.056073	0.994321	1130	1	-3.4608
Spock3	6	0.30765	0.57374	1	11437	3	-5.7698	0.049967	0.05624	0.994321	1131	1	-5.7698
LOC103163500	6	0.20725	0.44461	1	9243	3	-5.7667	0.050014	0.056278	0.994321	1132	1	-5.7667
LOC100764744	6	0.24528	0.49529	1	10109	3	-5.4513	0.05011	0.056359	0.994321	1133	1	-5.4513
LOC100751039	6	0.21207	0.45127	1	9370	3	-4.0171	0.050157	0.056397	0.994321	1134	1	-4.0171
Kank3	6	0.21911	0.46072	1	9511	4	-6.4429	0.050205	0.056441	0.994321	1135	1	-6.4429
Cask	6	0.29586	0.55939	1	11208	3	-6.0863	0.050253	0.05648	0.994321	1136	1	-6.0863
Acrv1	6	0.18438	0.41291	0.993383	8711	3	-2.9928	0.0503	0.056528	0.994321	1137	1	-2.9928
LOC100762658	6	0.00037414	0.0019923	0.18616	229	4	-5.1225	0.050348	0.056571	0.994321	1138	1	-5.1225
LOC100764997	6	0.64781	0.83739	1	16103	2	-3.6573	0.050396	0.056612	0.994321	1139	1	-3.6573
Cep250	6	0.0013245	0.0066492	0.275384	504	5	-6.5807	0.050443	0.056657	0.994321	1140	1	-6.5807
Akap14	6	0.84512	0.92389	1	18072	2	-5.3566	0.050539	0.056751	0.994321	1141	1	-5.3566
Tes	6	0.92261	0.9558	1	19027	1	-5.1325	0.050586	0.056802	0.994321	1142	1	-5.1325
LOC100763880	5	0.10336	0.26227	0.873088	6682	3	-6.1231	0.050601	0.054165	0.994321	1143	1	-6.1231
LOC100754630	6	0.019385	0.078353	0.594747	2732	5	-6.2626	0.050682	0.056885	0.994321	1144	1	-6.2626
CTRLX17971	1	0.9493	0.9495	1	19376	0	-2.0322	0.050696	0.050729	0.994321	1145	0	-2.0322
Nlrp2	5	0.11441	0.28338	0.888858	7010	3	-5.014	0.05076	0.054314	0.994321	1146	1	-5.014
Polr3gl	6	0.37333	0.6385	1	12530	2	-4.806	0.050777	0.056972	0.994321	1147	1	-4.806
Slfn14	6	0.24269	0.4919	1	10045	4	-5.8694	0.050825	0.057016	0.994321	1148	1	-5.8694
LOC100761271	6	0.0041391	0.019816	0.370472	1113	5	-6.0839	0.050872	0.05705	0.994321	1149	1	-6.0839
LOC100753806	5	0.011703	0.045719	0.503528	2060	1	-5.7282	0.05088	0.054413	0.994321	1150	1	-5.7282
Fate1	6	0.1371	0.34422	0.942604	7592	4	-5.3957	0.050968	0.057132	0.994321	1151	1	-5.3957
Apba3	6	0.15654	0.37294	0.967462	8050	3	-6.0676	0.051015	0.057182	0.994321	1152	1	-6.0676
Acot9	6	0.46642	0.70709	1	13702	3	-3.8228	0.051158	0.057322	0.994321	1153	1	-3.8228
Uhmk1	6	0.55437	0.77089	1	14893	2	-4.2647	0.051206	0.057358	0.994321	1154	1	-4.2647
Krt80	6	0.1313	0.33543	0.935968	7452	3	-5.6053	0.051253	0.057405	0.994321	1155	1	-5.6053
Sema3g	6	0.0049985	0.023634	0.399582	1235	5	-4.3848	0.051301	0.057443	0.994321	1156	1	-4.3848
Map1lc3a	6	0.12715	0.32904	0.933371	7324	3	-6.3913	0.051349	0.057491	0.994321	1157	1	-6.3913
LOC100772780	6	0.79485	0.89958	1	17487	2	-5.4698	0.051396	0.057541	0.994321	1158	1	-5.4698
Sepn1	6	0.092227	0.26404	0.874939	6229	4	-4.6946	0.051444	0.05758	0.994321	1159	1	-4.6946
Hibch	6	0.77536	0.89094	1	17275	2	-4.9005	0.051492	0.057624	0.994321	1160	1	-4.9005
LOC100759980	1	0.94846	0.94863	1	19361	0	-2.1259	0.051537	0.051575	0.994321	1161	0	-2.1259
Engase	6	0.29083	0.5532	1	11092	3	-5.041	0.051634	0.057769	0.994321	1162	1	-5.041
Ubr1	6	0.16997	0.39238	0.979504	8376	3	-5.5725	0.051682	0.057811	0.994321	1163	1	-5.5725
CTRLX09134	1	0.94828	0.94846	1	19359	0	-0.32541	0.051716	0.051755	0.994321	1164	0	-0.32541
LOC100763594	6	0.83353	0.918	1	17922	2	-4.0538	0.05173	0.057852	0.994321	1165	1	-4.0538
Lrpap1	6	0.11542	0.31106	0.918584	7034	4	-5.7151	0.051825	0.057939	0.994321	1166	1	-5.7151
Znf32	6	0.25631	0.50964	1	10364	3	-4.8139	0.051873	0.05799	0.994321	1167	1	-4.8139
Duox1	6	0.74617	0.87837	1	16976	1	-5.8879	0.05192	0.058043	0.994321	1168	1	-5.8879
LOC100769708	4	0.98774	0.98773	1	20507	0	-4.2808	0.05193	0.053446	0.994321	1169	1	-4.2808
Tmem9	6	0.15498	0.37071	0.967335	8011	4	-2.9074	0.051968	0.058088	0.994321	1170	1	-2.9074
LOC103161741	5	0.40084	0.63084	1	12867	3	-5.8735	0.051993	0.055472	0.994321	1171	1	-5.8735
Etnppl	6	0.79296	0.89874	1	17471	2	-4.2583	0.052015	0.058128	0.994321	1172	1	-4.2583
LOC100766167	1	0.94797	0.94814	1	19352	0	-2.1484	0.052027	0.052059	0.994321	1173	0	-2.1484
LOC103160129	6	0.56135	0.77591	1	14997	2	-5.178	0.052063	0.058162	0.994321	1174	1	-5.178
LOC100773648	6	0.99342	0.99335	1	20846	0	-5.3314	0.052158	0.058249	0.994321	1175	1	-5.3314
Wdr5b	6	0.72038	0.86787	1	16731	1	-5.8049	0.052206	0.058294	0.994321	1176	1	-5.8049
Gpihbp1	6	0.17316	0.39691	0.983367	8451	4	-6.0443	0.052301	0.058367	0.994321	1177	1	-6.0443
Hyal3	6	0.0079144	0.036175	0.465117	1632	5	-4.6995	0.052349	0.058409	0.994321	1178	1	-4.6995
Filip1	6	0.19713	0.43072	1	9017	4	-5.847	0.052396	0.05845	0.994321	1179	1	-5.847
Higd1c	6	0.0050232	0.023744	0.399582	1240	5	-6.0309	0.052444	0.058492	0.994321	1180	1	-6.0309
LOC100755542	5	0.99499	0.99496	1	20954	0	-5.9711	0.05251	0.055924	0.994321	1181	1	-5.9711
Nell1	6	0.098634	0.27837	0.884449	6507	4	-5.1312	0.052539	0.058574	0.994321	1182	1	-5.1312
Barhl1	6	0.53591	0.75756	1	14633	2	-3.3363	0.052586	0.058615	0.994321	1183	1	-3.3363
Rnf128	5	0.44429	0.67204	1	13439	2	-5.2002	0.052589	0.055997	0.994321	1184	1	-5.2002
Pon1	6	0.47603	0.71412	1	13834	3	-6.0225	0.052634	0.058652	0.994321	1185	1	-6.0225
Gadd45gip1	6	0.090111	0.25925	0.871686	6132	1	-5.835	0.052729	0.058731	0.994321	1186	1	-5.835
Wnt16	6	0.081287	0.23901	0.852071	5799	4	-5.9675	0.052777	0.058778	0.994321	1187	1	-5.9675
Prr22	6	0.045498	0.15126	0.745119	4188	4	-6.6963	0.052824	0.058819	0.994321	1188	1	-6.6963
Shh	6	0.21604	0.45664	1	9456	2	-3.6983	0.052872	0.058859	0.994321	1189	1	-3.6983
Mrpl21	6	0.90385	0.95127	1	18845	1	-6.5732	0.052919	0.058897	0.994321	1190	1	-6.5732
Pde1c	6	0.1349	0.34088	0.939762	7539	3	-5.7467	0.052967	0.058936	0.994321	1191	1	-5.7467
Cd8b	5	0.9734	0.97346	1	19928	0	-5.7711	0.053026	0.056409	0.994321	1192	1	-5.7711
LOC100766861	6	0.70711	0.86261	1	16620	2	-3.2549	0.053062	0.059027	0.994321	1193	1	-3.2549
Dnase1l1	6	0.48242	0.71876	1	13917	3	-5.569	0.05311	0.059069	0.994321	1194	1	-5.569
LOC100759622	6	0.87543	0.93992	1	18510	2	-5.6365	0.053157	0.059112	0.994321	1195	1	-5.6365
LOC103158809	6	0.10535	0.29302	0.898907	6746	4	-6.1205	0.053205	0.059155	0.994321	1196	1	-6.1205
Dync1li2	6	0.30298	0.56809	1	11356	3	-4.6584	0.053252	0.059193	0.994321	1197	1	-4.6584
Phc1	6	0.054899	0.17527	0.777856	4633	4	-5.3076	0.0533	0.059234	0.994321	1198	1	-5.3076
Muc1	6	0.22668	0.47083	1	9662	4	-6.0538	0.053348	0.059272	0.994321	1199	1	-6.0538
LOC100756249	6	0.079224	0.23424	0.847124	5717	4	-6.3622	0.053395	0.059319	0.994321	1200	1	-6.3622
Mtor	6	0.99064	0.99059	1	20683	0	-5.8443	0.053633	0.059522	0.994321	1201	1	-5.8443
LOC100750928	6	0.35962	0.62832	1	12367	3	-4.4106	0.05368	0.059563	0.994321	1202	1	-4.4106
Col3a1	6	0.47056	0.71009	1	13763	2	-3.2965	0.053775	0.059653	0.994321	1203	1	-3.2965
Agpat2	6	0.27344	0.53146	1	10730	4	-5.7957	0.053823	0.059696	0.994321	1204	1	-5.7957
CTRLX14993	1	0.94616	0.9463	1	19329	0	-2.2766	0.053839	0.053851	0.994321	1205	0	-2.2766
LOC107977585	6	0.084819	0.24722	0.859478	5940	2	-5.9313	0.053918	0.059782	0.994321	1206	1	-5.9313
Amt	6	0.41292	0.66784	1	13020	3	-5.1283	0.054013	0.059872	0.994321	1207	1	-5.1283
Pqbp1	6	0.88134	0.9432	1	18589	2	-6.8389	0.054061	0.059916	0.994321	1208	1	-6.8389
Sox2	6	0.58089	0.79002	1	15228	3	-6.2527	0.054108	0.059966	0.994321	1209	1	-6.2527
Cptp	6	0.097772	0.27645	0.882529	6475	4	-6.3633	0.054156	0.060002	0.994321	1210	1	-6.3633
Dnah10	6	0.060778	0.19009	0.801008	4897	5	-4.821	0.054203	0.06004	0.994321	1211	1	-4.821
Il1rn	6	0.21303	0.45259	1	9390	4	-5.2428	0.054251	0.060081	0.994321	1212	1	-5.2428
Sharpin	6	0.25911	0.51322	1	10436	4	-5.5133	0.054346	0.060162	0.994321	1213	1	-5.5133
Ppy	6	0.97626	0.97752	1	20008	1	-3.8904	0.054393	0.060207	0.994321	1214	1	-3.8904
Clrn3	6	0.2935	0.55648	1	11154	2	-4.1037	0.054441	0.060247	0.994321	1215	1	-4.1037
LOC107976991	5	0.93839	0.94623	1	19214	1	-3.925	0.054454	0.057762	0.994321	1216	1	-3.925
LOC100765659	6	0.010886	0.048477	0.513189	1974	3	-5.4076	0.054583	0.060358	0.994321	1217	1	-5.4076
Plxnc1	6	0.33723	0.6089	1	12022	4	-4.2195	0.054631	0.060402	0.994321	1218	1	-4.2195
Tpra1	6	0.13846	0.34622	0.944148	7614	4	-6.0951	0.054678	0.060447	0.994321	1219	1	-6.0951
Mrps36	6	0.82908	0.91578	1	17870	2	-4.1166	0.054726	0.060499	0.994321	1220	1	-4.1166
Cwc15	6	0.65012	0.83901	1	16136	1	-5.5555	0.054821	0.06059	0.994321	1221	1	-5.5555
Mier2	6	0.3332	0.6042	1	11952	3	-3.1214	0.054868	0.060627	0.994321	1222	1	-3.1214
Arf5	6	0.60146	0.80471	1	15482	3	-5.9791	0.054916	0.060676	0.994321	1223	1	-5.9791
LOC100774470	5	0.91644	0.93492	1	18957	1	-4.7871	0.05501	0.058294	0.994321	1224	1	-4.7871
Sp4	6	0.083151	0.24334	0.855614	5877	3	-5.6829	0.05501	0.06078	0.994321	1225	1	-5.6829
Ppp2r1a	6	0.29337	0.55631	1	11149	4	-5.8599	0.055058	0.060818	0.994321	1226	1	-5.8599
Cdc25b	6	0.00763	0.034977	0.462143	1588	4	-5.9493	0.055105	0.060871	0.994321	1227	1	-5.9493
LOC100772041	6	0.027806	0.10293	0.654951	3260	4	-4.1639	0.055153	0.060911	0.994321	1228	1	-4.1639
Elmsan1	6	0.22098	0.46323	1	9547	2	-5.2228	0.0552	0.060956	0.994321	1229	1	-5.2228
Emilin1	6	0.62141	0.81881	1	15746	3	-6.4796	0.055248	0.060997	0.994321	1230	1	-6.4796
LOC100758702	6	0.13551	0.34179	0.940475	7552	4	-3.6392	0.055295	0.061047	0.994321	1231	1	-3.6392
LOC100751452	6	0.40162	0.65946	1	12877	3	-3.6381	0.05539	0.06113	0.994321	1232	1	-3.6381
Gapdhs	6	0.8487	0.92569	1	18110	2	-4.7368	0.055438	0.06118	0.994321	1233	1	-4.7368
Pla2g7	6	0.95742	0.96735	1	19530	1	-5.3257	0.055485	0.061219	0.994321	1234	1	-5.3257
Zwilch	4	0.57517	0.72585	1	15169	2	-6.0701	0.055527	0.056836	0.994321	1235	1	-6.0701
Slitrk5	6	0.058169	0.1836	0.787399	4800	5	-5.8825	0.055533	0.061261	0.994321	1236	1	-5.8825
Pxdc1	6	0.06651	0.20405	0.816337	5164	4	-5.6941	0.05558	0.061306	0.994321	1237	1	-5.6941
LOC100768452	5	0.88022	0.92072	1	18572	1	-4.3617	0.055644	0.058891	0.994321	1238	1	-4.3617
Dennd5b	6	0.054161	0.17342	0.775098	4599	4	-6.6692	0.055675	0.061388	0.994321	1239	1	-6.6692
LOC100765963	5	0.59128	0.7705	1	15347	1	-5.6759	0.055723	0.058964	0.994321	1240	1	-5.6759
Dpyd	5	0.66971	0.81378	1	16311	1	-5.118	0.055763	0.059002	0.994321	1241	1	-5.118
Nfatc4	6	0.017397	0.072359	0.578581	2587	5	-6.5879	0.05577	0.061471	0.994321	1242	1	-6.5879
Cep135	6	0.24441	0.49412	1	10084	2	-4.7506	0.055817	0.06151	0.994321	1243	1	-4.7506
Pim2	6	0.94864	0.96379	1	19365	1	-4.0609	0.055865	0.061549	0.994321	1244	1	-4.0609
Kcnk17	6	0.034408	0.12149	0.693153	3624	4	-5.9223	0.055912	0.061597	0.994321	1245	1	-5.9223
Tnfaip8l3	5	0.98886	0.98889	1	20582	0	-2.699	0.055961	0.059175	0.994321	1246	1	-2.699
Swsap1	6	0.33436	0.60554	1	11969	2	-2.978	0.056055	0.061729	0.994321	1247	1	-2.978
Ghrl	6	0.047186	0.15565	0.75375	4257	5	-5.7824	0.056102	0.061767	0.994321	1248	1	-5.7824
Coch	6	0.59297	0.79869	1	15370	1	-5.639	0.056149	0.061811	0.994321	1249	1	-5.639
Tmem233	6	0.19611	0.42931	1	8994	3	-4.827	0.056197	0.061851	0.994321	1250	1	-4.827
Cyhr1	6	0.44187	0.68914	1	13407	3	-4.9612	0.056244	0.061889	0.994321	1251	1	-4.9612
Fam124b	6	0.00070374	0.0036499	0.229031	338	4	-6.2468	0.056292	0.061934	0.994321	1252	1	-6.2468
LOC100755906	4	0.9996	0.99961	1	21617	0	-3.7793	0.056321	0.057606	0.994321	1253	1	-3.7793
Kctd10	6	0.0083212	0.037871	0.472707	1678	4	-5.1513	0.056339	0.061977	0.994321	1254	1	-5.1513
LOC100755171	5	0.25601	0.48448	1	10358	2	-4.4146	0.056357	0.059548	0.994321	1255	1	-4.4146
Mrvi1	6	0.4469	0.69287	1	13466	2	-5.2053	0.056387	0.062025	0.994321	1256	1	-5.2053
Adhfe1	6	0.024685	0.093939	0.635934	3065	5	-5.4543	0.056434	0.062063	0.994321	1257	1	-5.4543
LOC100755880	5	0.20193	0.42695	0.999675	9119	3	-5.6166	0.056515	0.059692	0.994321	1258	1	-5.6166
Cxcl3	6	0.0097083	0.043724	0.494134	1854	5	-6.1172	0.056529	0.06215	0.994321	1259	1	-6.1172
Txndc2	6	0.88623	0.94597	1	18673	1	-4.1962	0.056576	0.06219	0.994321	1260	1	-4.1962
Rap1b	6	0.93455	0.95915	1	19169	1	-3.2721	0.056624	0.062232	0.994321	1261	1	-3.2721
Sh3bgrl2	6	0.082658	0.24222	0.855169	5852	4	-5.6617	0.056718	0.062317	0.994321	1262	1	-5.6617
Usp45	6	0.81901	0.91086	1	17756	2	-5.1195	0.056813	0.062402	0.994321	1263	1	-5.1195
Ednrb	6	0.01985	0.079715	0.59647	2768	5	-4.7573	0.056908	0.062478	0.994321	1264	1	-4.7573
Tapt1	6	0.92893	0.9575	1	19088	1	-2.2423	0.056955	0.062528	0.994321	1265	1	-2.2423
Abhd8	6	0.16492	0.38511	0.975668	8260	3	-5.3462	0.05705	0.062608	0.994321	1266	1	-5.3462
LOC100750764	6	0.0094558	0.042666	0.491465	1821	5	-5.7338	0.057145	0.062686	0.994321	1267	1	-5.7338
Nsrp1	5	0.82773	0.90536	1	17855	1	-6.128	0.057227	0.060363	0.994321	1268	1	-6.128
Tmem222	6	0.29014	0.55235	1	11075	3	-4.797	0.05724	0.062771	0.994321	1269	1	-4.797
LOC100767714	6	0.19362	0.42581	0.998826	8943	3	-5.1622	0.057287	0.062814	0.994321	1270	1	-5.1622
Aff3	6	0.95222	0.96515	1	19433	1	-5.8032	0.057335	0.062862	0.994321	1271	1	-5.8032
LOC100765439	6	0.22718	0.47147	1	9672	3	-4.3125	0.057382	0.062904	0.994321	1272	1	-4.3125
LOC100759491	6	0.0076319	0.034985	0.462143	1589	5	-5.7903	0.057429	0.062943	0.994321	1273	1	-5.7903
Lmln	6	0.58194	0.79075	1	15243	3	-5.2627	0.057477	0.062988	0.994321	1274	1	-5.2627
Ticam1	6	0.087485	0.25327	0.86579	6044	4	-5.0664	0.057571	0.063074	0.994321	1275	1	-5.0664
Mxra7	6	0.75878	0.88368	1	17104	2	-4.7609	0.057619	0.063122	0.994321	1276	1	-4.7609
Arl6ip1	6	0.2002	0.4349	1	9075	4	-6.0477	0.057666	0.063168	0.994321	1277	1	-6.0477
Svop	6	0.30537	0.57098	1	11398	4	-5.9774	0.057714	0.063207	0.994321	1278	1	-5.9774
Ghrhr	6	0.43191	0.68179	1	13280	3	-4.8963	0.057761	0.063251	0.994321	1279	1	-4.8963
Pdcd10	5	0.42034	0.64948	1	13119	2	-5.4568	0.057821	0.060903	0.994321	1280	1	-5.4568
Bbx	6	0.014255	0.06175	0.548834	2335	4	-4.223	0.05795	0.063433	0.994321	1281	1	-4.223
Cdnf	6	0.93843	0.96027	1	19215	1	-5.7275	0.058045	0.063529	0.994321	1282	1	-5.7275
LOC100753793	5	0.18055	0.39985	0.985105	8617	2	-5.0456	0.058137	0.061188	0.994321	1283	1	-5.0456
Hectd2	4	0.26504	0.47297	1	10569	3	-5.8541	0.058162	0.059321	0.994321	1284	1	-5.8541
CTRLX06142	1	0.94179	0.94197	1	19271	0	-2.4945	0.058207	0.058195	0.994321	1285	0	-2.4945
Slc7a5	6	0.91407	0.95362	1	18927	1	-4.8176	0.058234	0.063682	0.994321	1286	1	-4.8176
LOC103164128	6	0.71889	0.86729	1	16719	2	-3.1103	0.058282	0.063724	0.994321	1287	1	-3.1103
Znf703	6	0.595	0.80013	1	15395	3	-4.8639	0.058329	0.063764	0.994321	1288	1	-4.8639
LOC100765671	5	0.97917	0.97927	1	20112	0	-5.2878	0.058453	0.061471	0.994321	1289	1	-5.2878
Adnp2	6	0.061188	0.1911	0.802691	4912	4	-5.173	0.058518	0.06393	0.994321	1290	1	-5.173
Cpsf6	6	0.65664	0.84337	1	16203	2	-6.355	0.058755	0.06415	0.994321	1291	1	-6.355
LOC103160317	4	0.99314	0.99311	1	20823	0	-2.2665	0.058828	0.059941	0.994321	1292	1	-2.2665
Hmgcl	6	0.592	0.798	1	15358	3	-5.479	0.05885	0.064243	0.994321	1293	1	-5.479
Nr2c2	6	0.11244	0.30644	0.913924	6958	4	-3.3693	0.058944	0.06432	0.994321	1294	1	-3.3693
Edn2	6	0.045555	0.15141	0.745119	4191	5	-5.5704	0.058992	0.064362	0.994321	1295	1	-5.5704
Tgm5	5	0.023255	0.085187	0.6128	2966	3	-5.7508	0.059046	0.062016	0.994321	1296	1	-5.7508
Strn	6	0.17671	0.40194	0.986664	8538	3	-5.3202	0.059086	0.064451	0.994321	1297	1	-5.3202
Rgs9	6	0.024019	0.091984	0.631705	3019	5	-4.6141	0.059134	0.064492	0.994321	1298	1	-4.6141
Piezo1	6	0.073992	0.22202	0.835726	5492	5	-4.8521	0.059275	0.064614	0.994321	1299	1	-4.8521
Rgs14	6	0.62459	0.82106	1	15793	3	-5.3049	0.059323	0.064662	0.994321	1300	1	-5.3049
Cdk5rap2	6	0.10848	0.29979	0.905926	6860	4	-6.4389	0.059417	0.06476	0.994321	1301	1	-6.4389
Bloc1s1	6	0.51279	0.74086	1	14315	3	-5.9874	0.059465	0.064803	0.994321	1302	1	-5.9874
Aldh4a1	6	0.0035037	0.016907	0.358923	988	3	-5.8222	0.059512	0.064847	0.994321	1303	1	-5.8222
Pank4	6	0.25767	0.51139	1	10403	4	-4.6793	0.059559	0.064889	0.994321	1304	1	-4.6793
Pmp22	6	0.19038	0.42127	0.99589	8870	4	-4.791	0.059607	0.064928	0.994321	1305	1	-4.791
Rbm22	6	0.99999	0.99999	1	21876	0	-3.3212	0.059654	0.064964	0.994321	1306	1	-3.3212
Krt9	6	0.075819	0.22638	0.839504	5574	4	-6.0505	0.059701	0.065011	0.994321	1307	1	-6.0505
Glipr2	6	0.02307	0.089219	0.626101	2957	4	-5.9898	0.059748	0.065052	0.994321	1308	1	-5.9898
LOC100761654	6	0.0010241	0.0052	0.252127	430	3	-2.698	0.059796	0.0651	0.994321	1309	1	-2.698
Syn1	6	0.20605	0.44297	1	9218	3	-4.1415	0.05989	0.065187	0.994321	1310	1	-4.1415
Kcnk6	6	0.055818	0.17761	0.780362	4680	4	-5.0019	0.059937	0.065225	0.994321	1311	1	-5.0019
Prrt4	6	0.10303	0.28796	0.893348	6669	5	-5.9012	0.059985	0.065267	0.994321	1312	1	-5.9012
Akap5	6	0.30069	0.56531	1	11310	4	-6.0416	0.060032	0.065308	0.994321	1313	1	-6.0416
LOC100774550	6	0.51801	0.74466	1	14383	2	-5.3513	0.060079	0.065346	0.994321	1314	1	-5.3513
Mpzl3	6	0.1314	0.33558	0.935968	7455	3	-4.9461	0.060221	0.06548	0.994321	1315	1	-4.9461
LOC100773089	5	0.59053	0.77008	1	15341	2	-5.4677	0.06023	0.063156	0.994321	1316	1	-5.4677
Pdlim5	6	0.073491	0.2208	0.835268	5469	4	-6.336	0.060268	0.065525	0.994321	1317	1	-6.336
LOC103164536	6	0.79571	0.89998	1	17493	2	-5.6689	0.060316	0.065573	0.994321	1318	1	-5.6689
Slc17a6	6	0.027346	0.10162	0.652712	3227	3	-5.8691	0.060363	0.065614	0.994321	1319	1	-5.8691
Ubap2	6	0.71834	0.86707	1	16715	2	-6.6388	0.060457	0.065707	0.994321	1320	1	-6.6388
LOC107977609	1	0.9395	0.93967	1	19234	0	-2.6207	0.060505	0.060526	0.994321	1321	0	-2.6207
Mpeg1	6	0.96417	0.97047	1	19686	1	-5.3114	0.060505	0.065759	0.994321	1322	1	-5.3114
LOC100764080	6	0.095735	0.27197	0.879978	6380	3	-4.0421	0.060552	0.065806	0.994321	1323	1	-4.0421
Kpna5	6	0.20927	0.44747	1	9290	1	-5.5521	0.060646	0.0659	0.994321	1324	1	-5.5521
Krt82	6	0.0034541	0.016677	0.358165	978	3	-6.0595	0.060694	0.065938	0.994321	1325	1	-6.0595
Sgsm2	6	0.085407	0.24855	0.86068	5962	5	-6.0498	0.060788	0.066025	0.994321	1326	1	-6.0498
Eif2d	6	0.85655	0.92979	1	18231	1	-4.2355	0.060835	0.066066	0.994321	1327	1	-4.2355
LOC100770566	5	0.95005	0.95351	1	19397	1	-5.6435	0.060862	0.063724	0.994321	1328	1	-5.6435
LOC100761112	6	0.010411	0.046588	0.504582	1928	4	-3.9887	0.060883	0.066116	0.994321	1329	1	-3.9887
Znf219	6	0.59986	0.80356	1	15461	2	-5.7959	0.06093	0.066157	0.994321	1330	1	-5.7959
Cttnbp2	6	0.84828	0.92548	1	18105	2	-5.9314	0.060977	0.066197	0.994321	1331	1	-5.9314
Csnk1g2	6	0.016828	0.070673	0.574964	2542	4	-5.3513	0.061024	0.066242	0.994321	1332	1	-5.3513
Gfi1b	6	0.03772	0.13062	0.71364	3780	5	-3.9504	0.061071	0.066287	0.994321	1333	1	-3.9504
Tceanc	4	0.38054	0.58217	1	12623	2	-4.2983	0.061078	0.062026	0.994321	1334	1	-4.2983
Omd	5	0.99962	0.99963	1	21623	0	-4.4491	0.061138	0.064017	0.994321	1335	1	-4.4491
Arl13a	6	0.99996	0.99995	1	21818	0	-4.4766	0.061166	0.066365	0.994321	1336	1	-4.4766
Eri3	6	0.15635	0.37269	0.967462	8043	4	-6.3219	0.061213	0.066407	0.994321	1337	1	-6.3219
LOC100752140	6	0.086183	0.25033	0.862542	5993	4	-4.8537	0.061308	0.066494	0.994321	1338	1	-4.8537
Mettl24	6	0.2906	0.55293	1	11086	4	-6.078	0.061355	0.066536	0.994321	1339	1	-6.078
Adgre5	6	0.59776	0.80208	1	15434	2	-3.6235	0.061402	0.066578	0.994321	1340	1	-3.6235
Tpd52l1	5	0.62666	0.78967	1	15828	2	-5.2625	0.061414	0.064257	0.994321	1341	1	-5.2625
Pik3c2g	6	0.18263	0.41043	0.992181	8666	1	-5.9692	0.061496	0.066671	0.994321	1342	1	-5.9692
Dcxr	6	0.045613	0.15155	0.745467	4196	4	-5.3385	0.061544	0.066712	0.994321	1343	1	-5.3385
Mc5r	6	0.069493	0.2113	0.823693	5299	4	-5.1762	0.061591	0.066759	0.994321	1344	1	-5.1762
Siglec1	6	0.011514	0.050976	0.523057	2039	5	-6.0704	0.061638	0.0668	0.994321	1345	1	-6.0704
Ovca2	6	0.92692	0.95691	1	19070	1	-6.3621	0.061685	0.066843	0.994321	1346	1	-6.3621
Tshr	6	0.87057	0.93726	1	18428	2	-5.5528	0.061732	0.066887	0.994321	1347	1	-5.5528
Erich3	6	0.2166	0.45737	1	9465	4	-6.609	0.06178	0.066926	0.994321	1348	1	-6.609
Pkp1	6	0.024701	0.093987	0.635934	3069	5	-5.7657	0.061827	0.066973	0.994321	1349	1	-5.7657
LOC100758794	4	0.022682	0.071741	0.577055	2938	1	-2.5921	0.061837	0.062757	0.994321	1350	1	-2.5921
Bpifb1	6	0.5459	0.76476	1	14789	2	-5.4382	0.061874	0.06701	0.994321	1351	1	-5.4382
Mbd4	6	0.62059	0.81825	1	15730	3	-4.1331	0.061921	0.067057	0.994321	1352	1	-4.1331
LOC100766707	2	0.68836	0.69159	1	16469	1	-3.4734	0.061945	0.061833	0.994321	1353	0	-3.4734
Mcm9	6	0.28934	0.55134	1	11056	2	-6.0886	0.061968	0.067097	0.994321	1354	1	-6.0886
Cux2	6	0.06569	0.20207	0.813157	5130	2	-5.801	0.062016	0.067138	0.994321	1355	1	-5.801
LOC100756320	5	0.039131	0.12846	0.707638	3864	4	-2.9053	0.062044	0.064849	0.994321	1356	1	-2.9053
Mtfr1l	6	0.026355	0.098729	0.647394	3168	5	-6.8099	0.06211	0.067225	0.994321	1357	1	-6.8099
LOC107977657	6	0.10954	0.30192	0.907872	6892	4	-5.2477	0.062157	0.067268	0.994321	1358	1	-5.2477
Nicn1	6	0.44188	0.68916	1	13408	3	-5.3112	0.062204	0.06731	0.994321	1359	1	-5.3112
Vps11	6	0.74268	0.87695	1	16935	2	-6.1465	0.062251	0.067364	0.994321	1360	1	-6.1465
LOC100761813	6	0.00082412	0.0042238	0.240989	366	4	-3.3428	0.062346	0.067456	0.994321	1361	1	-3.3428
LOC100754297	6	0.017007	0.071197	0.576196	2552	4	-5.0212	0.06244	0.06755	0.994321	1362	1	-5.0212
Klhl21	6	0.13275	0.33766	0.936987	7495	4	-6.213	0.062534	0.06763	0.994321	1363	1	-6.213
Wsb2	6	0.44419	0.69085	1	13437	2	-3.6194	0.062582	0.06767	0.994321	1364	1	-3.6194
LOC107977030	6	0.48618	0.72155	1	13956	3	-5.1092	0.062629	0.067709	0.994321	1365	1	-5.1092
LOC100765442	6	0.078967	0.23364	0.846649	5701	2	-5.7758	0.062723	0.067793	0.994321	1366	1	-5.7758
LOC100756545	4	0.9495	0.94944	1	19380	0	-2.9589	0.062817	0.063703	0.994321	1367	1	-2.9589
Ppp1r14d	6	0.09365	0.26728	0.875882	6297	5	-4.3324	0.062817	0.067875	0.994321	1368	1	-4.3324
Paqr5	6	0.61203	0.81218	1	15619	3	-6.17	0.062912	0.067965	0.994321	1369	1	-6.17
LOC100765383	6	0.0071209	0.03284	0.449681	1532	2	-5.1305	0.062959	0.068005	0.994321	1370	1	-5.1305
Myrfl	6	0.071633	0.21643	0.829514	5392	5	-4.8057	0.063006	0.068041	0.994321	1371	1	-4.8057
Adamts18	6	0.43612	0.68493	1	13353	3	-6.0125	0.063147	0.06817	0.994321	1372	1	-6.0125
Ccdc88c	6	0.042091	0.14227	0.73094	4012	3	-5.8391	0.063195	0.068209	0.994321	1373	1	-5.8391
Dusp22	6	0.50229	0.73322	1	14177	3	-4.9341	0.063242	0.068268	0.994321	1374	1	-4.9341
Rnase9	5	0.9217	0.93743	1	19016	1	-3.5668	0.063265	0.06596	0.994321	1375	1	-3.5668
LOC100761806	6	0.14481	0.35575	0.954343	7769	2	-5.7375	0.063336	0.068353	0.994321	1376	1	-5.7375
Ccnc	4	0.85282	0.8775	1	18168	1	-4.879	0.063354	0.06422	0.994321	1377	1	-4.879
Ing2	6	0.54469	0.76388	1	14768	1	-2.8712	0.063383	0.068398	0.994321	1378	1	-2.8712
Kiaa1109	6	0.99125	0.99119	1	20710	0	-4.754	0.06343	0.068447	0.994321	1379	1	-4.754
Fezf2	6	0.11988	0.31791	0.922896	7145	2	-5.2691	0.063477	0.068487	0.994321	1380	1	-5.2691
Sh2d1a	6	0.42261	0.67509	1	13154	2	-4.9088	0.063524	0.068524	0.994321	1381	1	-4.9088
Pkib	6	0.93043	0.95793	1	19110	1	-4.6331	0.063572	0.068566	0.994321	1382	1	-4.6331
Xirp2	5	0.3687	0.59935	1	12477	2	-2.4354	0.06358	0.066244	0.994321	1383	1	-2.4354
LOC100762108	5	0.053026	0.15931	0.756572	4549	4	-6.6518	0.063659	0.06632	0.994321	1384	1	-6.6518
Tmem136	6	0.10053	0.28252	0.888196	6578	4	-6.9121	0.063666	0.068657	0.994321	1385	1	-6.9121
Msl3	6	0.15099	0.36484	0.96171	7920	3	-6.039	0.063713	0.068699	0.994321	1386	1	-6.039
Igsf21	6	0.02891	0.10612	0.661557	3324	4	-6.0945	0.06376	0.068746	0.994321	1387	1	-6.0945
Npc2	6	0.98897	0.9889	1	20589	0	-5.9605	0.063807	0.068793	0.994321	1388	1	-5.9605
LOC100770890	6	0.96816	0.97255	1	19782	1	-3.3807	0.063854	0.06884	0.994321	1389	1	-3.3807
Nsun5	6	0.13754	0.34487	0.943527	7599	2	-6.0503	0.063901	0.068882	0.994321	1390	1	-6.0503
Iqcc	6	0.76443	0.88617	1	17165	1	-5.985	0.063948	0.06892	0.994321	1391	1	-5.985
LOC100767157	4	0.49693	0.66714	1	14109	2	-4.5243	0.063986	0.064807	0.994321	1392	1	-4.5243
LOC103159343	6	0.54384	0.76328	1	14758	1	-5.4949	0.064043	0.06901	0.994321	1393	1	-5.4949
Fam155a	6	0.74299	0.87707	1	16937	2	-6.1713	0.064184	0.069135	0.994321	1394	1	-6.1713
Cpt1a	6	0.065682	0.20205	0.813157	5128	5	-5.6937	0.064231	0.06917	0.994321	1395	1	-5.6937
LOC100767496	6	0.12989	0.3332	0.935053	7412	3	-4.5291	0.064278	0.069215	0.994321	1396	1	-4.5291
LOC103161805	6	0.0064412	0.029967	0.434847	1447	5	-5.8332	0.064325	0.069255	0.994321	1397	1	-5.8332
Moxd1	6	0.88019	0.94256	1	18571	2	-5.5665	0.064514	0.069422	0.994321	1398	1	-5.5665
Mbd3	6	0.46175	0.70367	1	13647	3	-5.4613	0.064561	0.069465	0.994321	1399	1	-5.4613
Lamb2	6	0.00021769	0.0011607	0.151046	161	5	-4.8	0.064608	0.069501	0.994321	1400	1	-4.8
LOC100772276	6	0.092238	0.26407	0.874939	6230	4	-6.311	0.064702	0.069589	0.994321	1401	1	-6.311
Ak5	6	0.070584	0.21395	0.827443	5341	4	-4.8557	0.064749	0.069634	0.994321	1402	1	-4.8557
Erich4	6	0.04463	0.14898	0.742605	4140	3	-4.8587	0.064796	0.069672	0.994321	1403	1	-4.8587
LOC100764006	4	0.47108	0.64812	1	13775	1	-6.4388	0.064838	0.065644	0.994321	1404	1	-6.4388
LOC100765163	6	0.50078	0.7321	1	14154	2	-5.2668	0.064843	0.069712	0.994321	1405	1	-5.2668
Ptprq	5	0.87704	0.91965	1	18527	1	-4.4415	0.064878	0.067448	0.994321	1406	1	-4.4415
Ptprh	6	0.020994	0.083094	0.605223	2838	3	-4.4731	0.065031	0.069873	0.994321	1407	1	-4.4731
Egfl6	5	0.29329	0.52345	1	11148	2	-5.2748	0.065075	0.067636	0.994321	1408	1	-5.2748
Syt11	6	0.21816	0.45944	1	9492	2	-3.7348	0.065078	0.069916	0.994321	1409	1	-3.7348
LOC107977676	6	0.42785	0.67889	1	13235	3	-4.6983	0.065125	0.06996	0.994321	1410	1	-4.6983
Aqp11	6	0.36022	0.62878	1	12374	2	-6.3629	0.065267	0.070092	0.994321	1411	1	-6.3629
Nes	6	0.044563	0.1488	0.742605	4133	4	-5.8473	0.065314	0.070135	0.994321	1412	1	-5.8473
Rps6kb1	6	0.24563	0.49575	1	10119	4	-5.8753	0.065361	0.070183	0.994321	1413	1	-5.8753
Bcl7b	6	0.50704	0.73671	1	14239	3	-5.2296	0.065408	0.070222	0.994321	1414	1	-5.2296
Mageh1	6	0.66732	0.84736	1	16288	2	-3.9897	0.065455	0.07026	0.994321	1415	1	-3.9897
LOC107977051	6	0.067288	0.20593	0.817239	5207	4	-6.4829	0.065502	0.070303	0.994321	1416	1	-6.4829
Vwa5b2	6	0.50271	0.73354	1	14179	3	-4.8993	0.065596	0.070387	0.994321	1417	1	-4.8993
Rtp2	6	0.00098956	0.0050336	0.251786	421	5	-5.7144	0.06569	0.070474	0.994321	1418	1	-5.7144
Ccdc62	6	0.15676	0.37326	0.967672	8056	2	-4.1145	0.065737	0.070516	0.994321	1419	1	-4.1145
Plbd1	6	0.0079018	0.036123	0.465117	1629	4	-5.6049	0.065784	0.070555	0.994321	1420	1	-5.6049
LOC100768489	6	0.54986	0.7676	1	14836	2	-4.2343	0.065831	0.070597	0.994321	1421	1	-4.2343
Mettl23	6	0.58404	0.7923	1	15269	3	-5.9806	0.065878	0.070638	0.994321	1422	1	-5.9806
LOC100773367	6	0.079497	0.23485	0.847764	5731	3	-6.7953	0.065925	0.070684	0.994321	1423	1	-6.7953
Fdxr	6	0.98649	0.98643	1	20436	0	-5.8759	0.065972	0.070733	0.994321	1424	1	-5.8759
LOC100751378	6	0.10237	0.28653	0.891482	6646	4	-4.82	0.066019	0.070773	0.994321	1425	1	-4.82
Lsm10	6	0.97654	0.97772	1	20017	1	-5.039	0.066113	0.070861	0.994321	1426	1	-5.039
Taok2	6	0.2439	0.49347	1	10070	3	-5.4994	0.06616	0.07091	0.994321	1427	1	-5.4994
LOC100766093	6	0.18177	0.40923	0.991466	8646	3	-6.5465	0.066207	0.070958	0.994321	1428	1	-6.5465
Mks1	6	0.052578	0.16943	0.769808	4527	3	-5.7973	0.066254	0.071005	0.994321	1429	1	-5.7973
Uchl5	6	0.96175	0.9693	1	19631	1	-5.3479	0.066301	0.071046	0.994321	1430	1	-5.3479
Tlr6	6	0.53257	0.75518	1	14588	3	-4.8914	0.066348	0.07108	0.994321	1431	1	-4.8914
Znf143	5	0.99944	0.99944	1	21554	0	-4.4811	0.066449	0.068894	0.994321	1432	1	-4.4811
Mgmt	6	0.7101	0.8638	1	16654	1	-6.0793	0.066583	0.071299	0.994321	1433	1	-6.0793
Mkl2	6	0.054536	0.17436	0.77675	4619	4	-5.9804	0.06663	0.07134	0.994321	1434	1	-5.9804
LOC100754377	6	0.017643	0.073105	0.580993	2604	4	-5.9588	0.066724	0.071419	0.994321	1435	1	-5.9588
Pou6f1	6	0.33226	0.60313	1	11934	3	-6.5886	0.066818	0.0715	0.994321	1436	1	-6.5886
Tmprss7	6	0.55341	0.77018	1	14882	3	-4.4079	0.066865	0.07154	0.994321	1437	1	-4.4079
Chd4	6	0.95772	0.96747	1	19537	1	-4.3082	0.066959	0.071628	0.994321	1438	1	-4.3082
Fam126b	6	0.70185	0.86051	1	16579	2	-5.1734	0.067053	0.07171	0.994321	1439	1	-5.1734
Itpka	6	0.098862	0.27889	0.884592	6519	4	-4.8406	0.0671	0.071757	0.994321	1440	1	-4.8406
LOC100755608	6	0.019897	0.079843	0.59647	2771	5	-3.988	0.067147	0.071796	0.994321	1441	1	-3.988
LOC100755803	6	0.25149	0.50335	1	10247	4	-4.6043	0.067194	0.071833	0.994321	1442	1	-4.6043
Lhfpl1	6	0.10379	0.28965	0.894837	6697	5	-6.0279	0.067288	0.071921	0.994321	1443	1	-6.0279
Stx12	6	0.97991	0.98026	1	20139	1	-5.5733	0.067335	0.071968	0.994321	1444	1	-5.5733
Acyp1	6	0.57632	0.78668	1	15184	3	-4.0381	0.067382	0.072015	0.994321	1445	1	-4.0381
Etfb	6	0.010593	0.047317	0.508171	1948	5	-6.1435	0.067476	0.072101	0.994321	1446	1	-6.1435
LOC103164496	6	0.9013	0.95071	1	18824	1	-5.6779	0.067523	0.072141	0.994321	1447	1	-5.6779
LOC100765616	6	0.43256	0.68229	1	13289	2	-5.5426	0.06757	0.072185	0.994321	1448	1	-5.5426
Rbm33	6	0.81515	0.90905	1	17721	2	-3.2261	0.067617	0.072226	0.994321	1449	1	-3.2261
Magi2	6	0.26024	0.51466	1	10464	3	-5.6558	0.067663	0.072264	0.994321	1450	1	-5.6558
LOC100772379	6	0.82339	0.91299	1	17810	1	-3.8686	0.06771	0.072309	0.994321	1451	1	-3.8686
LOC107977033	6	0.10602	0.29445	0.899809	6776	4	-4.817	0.067757	0.072355	0.994321	1452	1	-4.817
Dxo	6	0.54958	0.7674	1	14831	2	-4.5992	0.067804	0.072399	0.994321	1453	1	-4.5992
Lnx1	6	0.082992	0.24298	0.855524	5869	4	-4.2642	0.067851	0.072445	0.994321	1454	1	-4.2642
Fam150b	6	0.10119	0.28395	0.889747	6602	3	-5.6293	0.067945	0.072519	0.994321	1455	1	-5.6293
LOC103163167	4	0.98445	0.98443	1	20338	0	-2.217	0.067958	0.068682	0.994321	1456	1	-2.217
Atg14	6	0.23897	0.48696	1	9960	4	-6.233	0.067992	0.072561	0.994321	1457	1	-6.233
LOC100759397	6	0.090492	0.26011	0.872429	6151	4	-6.0681	0.068086	0.072662	0.994321	1458	1	-6.0681
LOC100771610	6	0.87961	0.94225	1	18567	1	-3.4751	0.06818	0.072741	0.994321	1459	1	-3.4751
Lrmp	6	0.85488	0.9289	1	18205	2	-5.4735	0.068227	0.072785	0.994321	1460	1	-5.4735
Fmo4	6	0.35754	0.62679	1	12334	2	-5.8827	0.068321	0.072882	0.994321	1461	1	-5.8827
Fntb	6	0.99021	0.99015	1	20660	0	-6.4324	0.068367	0.072915	0.994321	1462	1	-6.4324
Spdef	6	0.032076	0.11501	0.677967	3511	3	-5.9599	0.068414	0.072954	0.994321	1463	1	-5.9599
Hnrnpa1	6	0.45499	0.69877	1	13568	1	-4.2469	0.068461	0.072998	0.994321	1464	1	-4.2469
Rec114	6	0.13727	0.34447	0.942897	7595	3	-4.6588	0.068508	0.073043	0.994321	1465	1	-4.6588
Cuta	6	0.83609	0.91928	1	17949	2	-3.0055	0.068555	0.073089	0.994321	1466	1	-3.0055
LOC100759196	5	0.95699	0.9586	1	19524	1	-3.648	0.068567	0.070933	0.994321	1467	1	-3.648
Sertad4	6	0.02665	0.099587	0.64809	3189	5	-4.8602	0.068602	0.073135	0.994321	1468	1	-4.8602
Slc35b1	6	0.12602	0.32737	0.931914	7291	4	-5.3391	0.068649	0.07318	0.994321	1469	1	-5.3391
LOC100761223	6	0.19373	0.42595	0.999053	8944	4	-6.2086	0.068743	0.073256	0.994321	1470	1	-6.2086
LOC100774806	6	0.042644	0.14378	0.733925	4041	3	-5.0214	0.068837	0.073337	0.994321	1471	1	-5.0214
Adgrf4	6	0.021379	0.084248	0.609531	2856	4	-5.0479	0.068883	0.07338	0.994321	1472	1	-5.0479
Scn5a	6	0.44574	0.69202	1	13455	3	-5.2742	0.06893	0.073432	0.994321	1473	1	-5.2742
Olfm1	6	0.59379	0.79928	1	15377	2	-2.9963	0.069071	0.073572	0.994321	1474	1	-2.9963
Ttll7	6	0.18153	0.40889	0.991204	8641	4	-6.1012	0.069165	0.073651	0.994321	1475	1	-6.1012
Hmgb2	6	0.99267	0.99262	1	20786	0	-4.3969	0.069212	0.073701	0.994321	1476	1	-4.3969
LOC100755549	6	0.013369	0.058307	0.540861	2240	4	-6.2811	0.069259	0.073744	0.994321	1477	1	-6.2811
Pak4	6	0.057795	0.18263	0.786561	4779	3	-5.9612	0.069305	0.073784	0.994321	1478	1	-5.9612
Sh3gl3	5	0.16763	0.37817	0.970843	8320	2	-5.8861	0.06939	0.071693	0.994321	1479	1	-5.8861
CTRLX05879	1	0.93058	0.93073	1	19113	0	-3.0732	0.069422	0.06945	0.994321	1480	0	-3.0732
Cacna2d2	6	0.5956	0.80055	1	15407	2	-4.1702	0.069446	0.073902	0.994321	1481	1	-4.1702
Arih2	6	0.99278	0.99274	1	20798	0	-5.5428	0.06954	0.073985	0.994321	1482	1	-5.5428
Abhd2	6	0.88799	0.94695	1	18699	1	-4.3467	0.069587	0.074033	0.994321	1483	1	-4.3467
Dmc1	5	0.36117	0.59196	1	12383	3	-6.0994	0.069742	0.072025	0.994321	1484	1	-6.0994
LOC100771548	6	0.84268	0.92268	1	18032	2	-5.4411	0.069774	0.074195	0.994321	1485	1	-5.4411
Rce1	6	0.077014	0.22916	0.84249	5625	3	-5.6748	0.069821	0.07424	0.994321	1486	1	-5.6748
Syntaxin-3	6	0.25306	0.50542	1	10290	3	-5.5857	0.069915	0.074318	0.994321	1487	1	-5.5857
Orai2	6	0.072302	0.218	0.831591	5420	5	-6.4722	0.070008	0.074412	0.994321	1488	1	-6.4722
Ryr2	6	0.13854	0.34633	0.944148	7619	3	-5.7359	0.070055	0.074462	0.994321	1489	1	-5.7359
Rnpc3	4	0.9982	0.99822	1	21299	0	-4.0714	0.070096	0.07077	0.994321	1490	1	-4.0714
LOC103160509	5	0.79699	0.89129	1	17503	1	-4.4156	0.070173	0.072421	0.994321	1491	1	-4.4156
Smc1b	6	0.15043	0.36401	0.960846	7907	3	-6.4447	0.070196	0.074594	0.994321	1492	1	-6.4447
Fam91a1	6	0.04337	0.14568	0.738202	4069	5	-6.4049	0.070243	0.07463	0.994321	1493	1	-6.4049
Sdccag8	6	0.012673	0.05557	0.534165	2168	4	-2.3863	0.070289	0.074669	0.994321	1494	1	-2.3863
LOC100765183	5	0.72349	0.84516	1	16759	2	-6.0131	0.070329	0.07257	0.994321	1495	1	-6.0131
Prss35	6	0.88288	0.94406	1	18619	2	-5.7444	0.070336	0.074716	0.994321	1496	1	-5.7444
LOC100764209	6	0.062021	0.19313	0.805907	4948	3	-3.8709	0.070383	0.074764	0.994321	1497	1	-3.8709
Fam107b	5	0.8851	0.92241	1	18657	1	-2.8371	0.070447	0.072679	0.994321	1498	1	-2.8371
LOC100765215	6	0.55763	0.77328	1	14941	2	-3.0836	0.070477	0.074861	0.994321	1499	1	-3.0836
Btg1	6	0.61583	0.81494	1	15662	3	-4.2406	0.070524	0.074896	0.994321	1500	1	-4.2406
CTRLX17262	1	0.92941	0.92959	1	19094	0	-3.1252	0.070587	0.07057	0.994321	1501	0	-3.1252
Znf513	6	0.4786	0.71597	1	13870	3	-3.1204	0.070617	0.074985	0.994321	1502	1	-3.1204
Hmgxb4	6	0.70996	0.86375	1	16650	2	-5.9575	0.070664	0.075027	0.994321	1503	1	-5.9575
Muc6	6	0.027769	0.10283	0.654951	3254	3	-4.6913	0.070711	0.075075	0.994321	1504	1	-4.6913
Rasef	6	0.81852	0.91065	1	17752	2	-4.4989	0.070805	0.075169	0.994321	1505	1	-4.4989
Sqstm1	6	0.071316	0.2157	0.829337	5370	4	-4.4274	0.070898	0.075253	0.994321	1506	1	-4.4274
LOC100767354	6	0.75303	0.88126	1	17051	2	-5.5224	0.070992	0.075347	0.994321	1507	1	-5.5224
Vpreb1	6	0.12276	0.32233	0.928908	7199	4	-6.5049	0.071039	0.075385	0.994321	1508	1	-6.5049
LOC100760928	6	0.031797	0.11421	0.676294	3493	2	-5.8329	0.071085	0.075432	0.994321	1509	1	-5.8329
Hdac7	6	0.06269	0.19477	0.807593	4981	5	-5.1792	0.071132	0.075475	0.994321	1510	1	-5.1792
Fahd1	6	0.028919	0.10614	0.661557	3325	5	-6.0065	0.071179	0.075516	0.994321	1511	1	-6.0065
Ovol2	6	0.012409	0.05453	0.533347	2131	5	-5.3008	0.071226	0.075558	0.994321	1512	1	-5.3008
Nosip	6	0.59325	0.79889	1	15373	2	-5.677	0.071273	0.075605	0.994321	1513	1	-5.677
LOC100755011	6	0.09724	0.27529	0.881519	6452	4	-5.3431	0.071319	0.075648	0.994321	1514	1	-5.3431
LOC100750551	5	0.20037	0.42523	0.998424	9082	3	-2.0322	0.071385	0.07355	0.994321	1515	1	-2.0322
LOC100768383	6	0.43601	0.68486	1	13351	2	-5.6017	0.071413	0.075726	0.994321	1516	1	-5.6017
Mfap3	6	0.56255	0.77678	1	15007	1	-3.7906	0.071507	0.075807	0.994321	1517	1	-3.7906
Pdcd11	6	0.99804	0.99802	1	21278	0	-5.2149	0.071553	0.07585	0.994321	1518	1	-5.2149
LOC100757762	6	0.0016855	0.0084239	0.296958	595	4	-6.021	0.0716	0.075899	0.994321	1519	1	-6.021
Egflam	5	0.044187	0.13985	0.727118	4117	2	-1.9492	0.07162	0.073765	0.994321	1520	1	-1.9492
Cfap44	6	0.25225	0.50435	1	10269	3	-5.2567	0.071694	0.075984	0.994321	1521	1	-5.2567
Osmr	6	0.036101	0.12624	0.702361	3717	2	-6.0988	0.071741	0.076023	0.994321	1522	1	-6.0988
Lhx6	6	0.12329	0.32316	0.928908	7218	4	-6.0828	0.071787	0.076069	0.994321	1523	1	-6.0828
LOC100765981	6	0.058863	0.18534	0.791368	4826	3	-4.4981	0.071881	0.076148	0.994321	1524	1	-4.4981
LOC100774280	6	0.14365	0.35401	0.952247	7747	4	-3.9614	0.071928	0.076191	0.994321	1525	1	-3.9614
Ctrl	6	0.9852	0.98514	1	20369	0	-3.8194	0.071974	0.076238	0.994321	1526	1	-3.8194
LOC100754871	4	0.99995	0.99995	1	21813	0	-2.4625	0.072012	0.072613	0.994321	1527	1	-2.4625
Ampd1	6	0.30063	0.56523	1	11309	3	-6.0991	0.072068	0.07633	0.994321	1528	1	-6.0991
Nkain4	6	0.090329	0.25973	0.872037	6142	5	-6.1498	0.072115	0.07637	0.994321	1529	1	-6.1498
Fam13a	6	0.27285	0.53069	1	10719	2	-5.5031	0.072208	0.076456	0.994321	1530	1	-5.5031
Mfsd11	6	0.74957	0.87977	1	17017	1	-5.2441	0.072255	0.0765	0.994321	1531	1	-5.2441
Khnyn	6	0.44391	0.69066	1	13433	3	-5.066	0.072302	0.076536	0.994321	1532	1	-5.066
Ppm1a	6	0.5626	0.77681	1	15009	3	-4.9542	0.072348	0.076578	0.994321	1533	1	-4.9542
LOC103158744	6	0.31919	0.58766	1	11687	3	-6.6535	0.072395	0.076624	0.994321	1534	1	-6.6535
Boc	6	0.81189	0.90753	1	17689	2	-6.4619	0.072442	0.076661	0.994321	1535	1	-6.4619
Abcg1	6	0.038729	0.13332	0.717661	3830	4	-5.254	0.072489	0.07671	0.994321	1536	1	-5.254
Aatk	6	0.013896	0.060364	0.545536	2300	4	-7.1737	0.072535	0.076752	0.994321	1537	1	-7.1737
Pex12	6	0.71267	0.86478	1	16669	2	-5.1787	0.072629	0.07683	0.994321	1538	1	-5.1787
Cideb	6	0.038334	0.13229	0.717568	3804	4	-4.327	0.072676	0.076868	0.994321	1539	1	-4.327
Tspo	6	0.43082	0.681	1	13262	2	-5.5396	0.072722	0.07691	0.994321	1540	1	-5.5396
Scarb1	6	0.3715	0.63716	1	12510	3	-3.2755	0.072769	0.07695	0.994321	1541	1	-3.2755
Fstl3	6	0.93037	0.95792	1	19109	1	-3.2675	0.072816	0.076992	0.994321	1542	1	-3.2675
LOC100767358	6	0.94603	0.96282	1	19326	1	-5.9122	0.073003	0.077168	0.994321	1543	1	-5.9122
Kif26a	6	0.094444	0.26905	0.877279	6334	4	-6.1994	0.07305	0.077212	0.994321	1544	1	-6.1994
Pcnx1	6	0.11809	0.31516	0.920169	7107	4	-6.2948	0.073096	0.077263	0.994321	1545	1	-6.2948
Prrg4	5	0.47964	0.70487	1	13884	2	-6.0955	0.073143	0.075227	0.994321	1546	1	-6.0955
LOC103162167	6	0.26782	0.52434	1	10633	3	-4.1466	0.073143	0.077307	0.994321	1547	1	-4.1466
Slc7a4	6	0.33502	0.60631	1	11980	4	-4.5736	0.07319	0.077349	0.994321	1548	1	-4.5736
Rnf215	6	0.051745	0.16733	0.767186	4488	5	-7.0328	0.07333	0.077473	0.994321	1549	1	-7.0328
Tbp	6	0.99657	0.99654	1	21094	0	-3.3801	0.073377	0.077502	0.994321	1550	1	-3.3801
Asb1	6	0.37171	0.63731	1	12513	2	-6.0148	0.073423	0.077545	0.994321	1551	1	-6.0148
Carf	6	0.53331	0.75572	1	14596	1	-3.7523	0.073563	0.07767	0.994321	1552	1	-3.7523
LOC103158991	6	0.053332	0.17127	0.772062	4562	5	-4.9203	0.073657	0.07775	0.994321	1553	1	-4.9203
LOC100752904	6	0.30009	0.56458	1	11298	4	-4.2411	0.073703	0.077787	0.994321	1554	1	-4.2411
LOC100774817	6	0.04713	0.15551	0.753617	4254	5	-5.3561	0.073797	0.077874	0.994321	1555	1	-5.3561
Wdr78	6	0.26183	0.51673	1	10498	4	-5.0757	0.073843	0.077915	0.994321	1556	1	-5.0757
Rpp25	5	0.64287	0.79859	1	16040	2	-1.5737	0.073845	0.075916	0.994321	1557	1	-1.5737
Cdkl1	6	0.18103	0.40816	0.990771	8630	4	-6.299	0.07389	0.077957	0.994321	1558	1	-6.299
LOC103159607	6	0.26282	0.51797	1	10524	3	-5.5754	0.073937	0.078003	0.994321	1559	1	-5.5754
Yrdc	6	0.98807	0.98801	1	20518	0	-6.2196	0.074077	0.078143	0.994321	1560	1	-6.2196
Ranbp17	4	0.85261	0.87738	1	18164	1	-2.6514	0.074112	0.074615	0.994321	1561	1	-2.6514
Gzmk	6	0.81966	0.91119	1	17765	2	-4.8739	0.074124	0.078173	0.994321	1562	1	-4.8739
Ntn1	6	0.61922	0.8173	1	15715	2	-3.526	0.07417	0.078221	0.994321	1563	1	-3.526
Gpr137b	6	0.43057	0.68082	1	13259	3	-6.0695	0.074217	0.078267	0.994321	1564	1	-6.0695
Ubtd1	6	0.1046	0.29142	0.897238	6723	5	-5.3585	0.074264	0.078312	0.994321	1565	1	-5.3585
Mier1	5	0.99844	0.99847	1	21330	0	-4.5677	0.074313	0.076354	0.994321	1566	1	-4.5677
Stat1	5	0.15757	0.36107	0.958427	8079	3	-3.4626	0.074352	0.076393	0.994321	1567	1	-3.4626
Oxct1	6	0.22183	0.46439	1	9562	4	-6.1318	0.074404	0.078444	0.994321	1568	1	-6.1318
LOC103160924	6	0.68593	0.85435	1	16440	2	-5.0523	0.07445	0.078487	0.994321	1569	1	-5.0523
Pcdh1	6	0.59468	0.79992	1	15391	3	-2.9377	0.074497	0.078523	0.994321	1570	1	-2.9377
Cad	6	0.52207	0.7476	1	14444	3	-5.799	0.074544	0.078568	0.994321	1571	1	-5.799
Olr1	6	0.36689	0.63375	1	12460	2	-4.9991	0.07459	0.078612	0.994321	1572	1	-4.9991
Jph2	6	0.06718	0.20568	0.817239	5199	5	-6.3235	0.074637	0.078659	0.994321	1573	1	-6.3235
Slc22a1	6	0.37382	0.63885	1	12537	3	-3.5722	0.074684	0.07871	0.994321	1574	1	-3.5722
LOC100771945	6	0.028578	0.10515	0.660122	3303	5	-5.8699	0.07473	0.07876	0.994321	1575	1	-5.8699
Smarcal1	6	0.0022462	0.011124	0.312059	747	4	-4.6914	0.074777	0.078802	0.994321	1576	1	-4.6914
Rybp	6	0.10764	0.29796	0.903405	6833	5	-3.1427	0.074824	0.078845	0.994321	1577	1	-3.1427
LOC100767566	6	0.65289	0.84094	1	16160	1	-2.315	0.07487	0.078889	0.994321	1578	1	-2.315
Scarf1	6	0.84073	0.92165	1	18009	2	-5.4061	0.074963	0.078977	0.994321	1579	1	-5.4061
LOC100775082	6	0.076955	0.22902	0.842464	5623	4	-5.8492	0.07501	0.079016	0.994321	1580	1	-5.8492
Gpatch1	6	0.70923	0.86346	1	16644	1	-5.8413	0.075057	0.079061	0.994321	1581	1	-5.8413
CTRLX00909	1	0.92492	0.92521	1	19053	0	-2.8007	0.075083	0.075045	0.994321	1582	0	-2.8007
Kcmf1	6	0.96621	0.97152	1	19733	1	-4.491	0.07515	0.079151	0.994321	1583	1	-4.491
Dnah17	6	0.7446	0.87773	1	16958	2	-5.8254	0.075197	0.079196	0.994321	1584	1	-5.8254
Pmepa1	6	0.062779	0.19499	0.807593	4986	5	-4.8174	0.075243	0.079231	0.994321	1585	1	-4.8174
LOC100760144	6	0.41495	0.66935	1	13043	2	-6.2527	0.07529	0.079274	0.994321	1586	1	-6.2527
Plcb3	6	0.18672	0.41615	0.994798	8767	4	-5.9203	0.075337	0.079322	0.994321	1587	1	-5.9203
LOC107979952	6	0.24766	0.49836	1	10169	4	-4.3382	0.075383	0.079361	0.994321	1588	1	-4.3382
Cfap65	6	0.8176	0.9102	1	17742	2	-4.2986	0.075476	0.079443	0.994321	1589	1	-4.2986
Nfu1	4	0.81353	0.85872	1	17706	1	-2.6899	0.075489	0.075957	0.994321	1590	1	-2.6899
Plppr4	6	0.19865	0.43282	1	9039	3	-6.285	0.075523	0.079485	0.994321	1591	1	-6.285
LOC100773556	6	0.92385	0.95611	1	19038	1	-5.7728	0.07557	0.079527	0.994321	1592	1	-5.7728
Ace	6	0.14085	0.3498	0.94743	7676	4	-5.524	0.075616	0.079576	0.994321	1593	1	-5.524
Dera	6	0.82033	0.91152	1	17775	2	-3.5984	0.075663	0.07962	0.994321	1594	1	-3.5984
Nek4	6	0.084757	0.24708	0.859478	5934	4	-4.4294	0.075709	0.079665	0.994321	1595	1	-4.4294
LOC103162656	6	0.45004	0.6952	1	13514	2	-5.1329	0.075756	0.079708	0.994321	1596	1	-5.1329
Oprm1	6	0.31217	0.5792	1	11528	3	-6.4074	0.075849	0.079785	0.994321	1597	1	-6.4074
Arhgap4	6	0.79427	0.89932	1	17482	1	-5.1024	0.075942	0.079872	0.994321	1598	1	-5.1024
Lrrtm4	6	0.28836	0.55013	1	11028	3	-6.1221	0.076129	0.08005	0.994321	1599	1	-6.1221
Cfap161	6	0.0016876	0.008432	0.296958	596	3	-5.6751	0.076175	0.08009	0.994321	1600	1	-5.6751
Mtm1	5	0.02265	0.083217	0.605712	2936	4	-6.4183	0.076183	0.078137	0.994321	1601	1	-6.4183
Ddah2	6	0.66476	0.84639	1	16265	2	-5.5319	0.076222	0.080132	0.994321	1602	1	-5.5319
Kdm3b	6	0.87057	0.93725	1	18427	2	-4.8761	0.076269	0.080175	0.994321	1603	1	-4.8761
Reep3	4	0.7225	0.82432	1	16749	1	-5.9824	0.076271	0.076705	0.994321	1604	1	-5.9824
Cab39l	6	0.1683	0.38995	0.978294	8338	3	-5.4349	0.076315	0.080215	0.994321	1605	1	-5.4349
Proz	6	0.1701	0.39258	0.979504	8380	4	-4.7826	0.076362	0.080263	0.994321	1606	1	-4.7826
Inppl1	6	0.47049	0.71004	1	13761	3	-5.7563	0.076408	0.080294	0.994321	1607	1	-5.7563
Por	6	0.021357	0.084193	0.609434	2854	4	-5.4188	0.076502	0.080374	0.994321	1608	1	-5.4188
Mrpl34	6	0.85956	0.93138	1	18268	1	-6.3059	0.076548	0.080412	0.994321	1609	1	-6.3059
Cryl1	6	0.13028	0.33384	0.935065	7426	3	-6.3686	0.076641	0.080503	0.994321	1610	1	-6.3686
Tnk2	6	0.4396	0.68744	1	13382	3	-4.6541	0.076688	0.080554	0.994321	1611	1	-4.6541
Gtpbp10	4	0.44269	0.62725	1	13413	1	-4.4487	0.076708	0.077106	0.994321	1612	1	-4.4487
LOC100761079	6	0.12353	0.32349	0.928908	7228	4	-6.0839	0.076781	0.08064	0.994321	1613	1	-6.0839
LOC103162199	6	0.98375	0.9837	1	20303	1	-2.4817	0.076828	0.080689	0.994321	1614	1	-2.4817
Mysm1	6	0.99976	0.99974	1	21670	0	-4.2047	0.076921	0.080768	0.994321	1615	1	-4.2047
Tbcel	6	0.093149	0.26611	0.87525	6269	4	-4.7578	0.076967	0.080807	0.994321	1616	1	-4.7578
LOC100754750	5	0.39891	0.62897	1	12842	2	-6.5142	0.077039	0.078933	0.994321	1617	1	-6.5142
Sun5	6	0.10376	0.28958	0.894837	6695	3	-4.7476	0.07706	0.080893	0.994321	1618	1	-4.7476
Col16a1	6	0.0072603	0.033396	0.451603	1552	4	-5.6777	0.077153	0.080976	0.994321	1619	1	-5.6777
Mex3a	6	0.93875	0.96037	1	19223	1	-5.6823	0.0772	0.081016	0.994321	1620	1	-5.6823
Dpysl4	6	0.31726	0.58533	1	11647	3	-5.3581	0.077247	0.081053	0.994321	1621	1	-5.3581
Slc4a1ap	6	0.043702	0.14657	0.7395	4088	3	-6.4152	0.077293	0.081092	0.994321	1622	1	-6.4152
Smarcc1	6	0.022653	0.088	0.62153	2937	3	-5.6552	0.077386	0.081196	0.994321	1623	1	-5.6552
Mrps12	6	0.99962	0.99961	1	21624	0	-5.2503	0.077433	0.081237	0.994321	1624	1	-5.2503
Taf11	6	0.38192	0.64489	1	12647	2	-5.1383	0.077479	0.081283	0.994321	1625	1	-5.1383
Zfp64	6	0.074764	0.22389	0.836718	5531	4	-4.1023	0.077526	0.081328	0.994321	1626	1	-4.1023
CTRLX05971	1	0.92244	0.92273	1	19025	0	-3.431	0.077559	0.077563	0.994321	1627	0	-3.431
LOC107978944	6	0.023112	0.089356	0.626517	2959	5	-4.9287	0.077619	0.081416	0.994321	1628	1	-4.9287
Itpr2	6	0.63566	0.82884	1	15941	2	-3.6895	0.077665	0.081454	0.994321	1629	1	-3.6895
Flrt1	6	0.58382	0.79215	1	15265	3	-5.6946	0.077712	0.081499	0.994321	1630	1	-5.6946
LOC100767000	5	0.70886	0.83654	1	16636	1	-2.5963	0.077739	0.079598	0.994321	1631	1	-2.5963
Slc26a7	6	0.086062	0.25004	0.862528	5987	3	-5.7071	0.077758	0.081545	0.994321	1632	1	-5.7071
Sstr5	6	0.042723	0.14401	0.734967	4042	5	-5.4254	0.077805	0.081579	0.994321	1633	1	-5.4254
LOC100765053	5	0.35496	0.58574	1	12302	3	-4.9684	0.077817	0.079683	0.994321	1634	1	-4.9684
LOC107980176	6	0.18708	0.41664	0.994798	8782	3	-5.8421	0.077851	0.081617	0.994321	1635	1	-5.8421
Spata17	6	0.020676	0.082154	0.603226	2816	5	-5.2963	0.077898	0.081661	0.994321	1636	1	-5.2963
Cenph	6	0.81914	0.91092	1	17758	2	-5.7565	0.078084	0.081821	0.994321	1637	1	-5.7565
LOC100767633	6	0.84093	0.92177	1	18011	1	-5.2572	0.078131	0.081867	0.994321	1638	1	-5.2572
Nf2	6	0.077889	0.23118	0.84373	5664	3	-5.6418	0.078177	0.08191	0.994321	1639	1	-5.6418
Slc26a9	6	0.21413	0.45411	1	9411	3	-3.9001	0.07827	0.081999	0.994321	1640	1	-3.9001
Acsl6	6	0.052777	0.16992	0.770124	4541	4	-4.2181	0.078317	0.082037	0.994321	1641	1	-4.2181
Rimklb	5	0.57308	0.7609	1	15140	2	-4.547	0.0784	0.080207	0.994321	1642	1	-4.547
Rab9b	5	0.023683	0.086549	0.616979	2996	1	-6.0166	0.078439	0.080237	0.994321	1643	1	-6.0166
Tacr2	6	0.14374	0.35415	0.952377	7749	4	-6.0557	0.078503	0.082211	0.994321	1644	1	-6.0557
Clec11a	6	0.012748	0.055865	0.534729	2175	4	-6.098	0.078549	0.08225	0.994321	1645	1	-6.098
LOC100772567	6	0.88524	0.94541	1	18660	2	-4.175	0.078596	0.082295	0.994321	1646	1	-4.175
LOC100759218	5	0.57537	0.76208	1	15175	1	-4.0189	0.078633	0.080428	0.994321	1647	1	-4.0189
Ssmem1	6	0.042768	0.14413	0.735032	4046	2	-6.2221	0.078642	0.082337	0.994321	1648	1	-6.2221
Shisa5	6	0.01722	0.071826	0.577055	2572	4	-5.2349	0.078689	0.082381	0.994321	1649	1	-5.2349
Kti12	6	0.1189	0.31645	0.921785	7120	2	-6.2574	0.078735	0.082422	0.994321	1650	1	-6.2574
Rufy1	6	0.024882	0.094502	0.636667	3082	4	-4.774	0.078781	0.082461	0.994321	1651	1	-4.774
LOC100757490	5	0.0090216	0.036032	0.465117	1773	4	-4.1977	0.078788	0.080569	0.994321	1652	1	-4.1977
LOC100759732	6	0.0019338	0.0096463	0.303865	667	5	-3.7078	0.078828	0.082506	0.994321	1653	1	-3.7078
Znf395	6	0.0017249	0.008606	0.298338	608	5	-5.5946	0.078874	0.082541	0.994321	1654	1	-5.5946
Cth	6	0.16141	0.38007	0.97228	8173	3	-5.5578	0.078921	0.082581	0.994321	1655	1	-5.5578
Ppp1r3a	5	0.4383	0.66645	1	13371	2	-3.9264	0.078944	0.080705	0.994321	1656	1	-3.9264
Aldh1l1	6	0.65589	0.84299	1	16194	2	-4.109	0.078967	0.082624	0.994321	1657	1	-4.109
Lrp10	6	0.052003	0.16801	0.767341	4503	4	-5.6872	0.079107	0.082741	0.994321	1658	1	-5.6872
CTRL00392	1	0.92088	0.92119	1	19014	0	-3.4939	0.079119	0.079121	0.994321	1659	0	-3.4939
Fam26d	6	0.54102	0.76123	1	14714	3	-5.9411	0.079153	0.082785	0.994321	1660	1	-5.9411
Rnf111	6	0.072266	0.21792	0.831591	5418	4	-3.9583	0.079293	0.082919	0.994321	1661	1	-3.9583
Hrasls	6	0.24942	0.50065	1	10206	4	-3.8785	0.079339	0.082956	0.994321	1662	1	-3.8785
Col4a1	6	0.02012	0.08051	0.600169	2777	5	-5.8381	0.079386	0.082997	0.994321	1663	1	-5.8381
Gap43	6	0.029178	0.10685	0.663205	3337	3	-5.3719	0.079478	0.08308	0.994321	1664	1	-5.3719
LOC100769432	6	0.82804	0.91527	1	17857	1	-4.2861	0.079525	0.083118	0.994321	1665	1	-4.2861
LOC103164457	6	0.97178	0.97461	1	19879	1	-4.2228	0.079571	0.083164	0.994321	1666	1	-4.2228
Cpsf7	6	0.36479	0.63219	1	12431	3	-5.5698	0.079618	0.083207	0.994321	1667	1	-5.5698
LOC100758808	6	0.26355	0.51888	1	10543	2	-3.6571	0.079664	0.083248	0.994321	1668	1	-3.6571
Opn3	6	0.19474	0.4274	1	8963	3	-5.4265	0.079711	0.083289	0.994321	1669	1	-5.4265
Glod5	6	0.22441	0.46785	1	9619	1	-4.4751	0.079757	0.083327	0.994321	1670	1	-4.4751
Paox	6	0.37863	0.64245	1	12603	2	-4.6806	0.079804	0.083372	0.994321	1671	1	-4.6806
Slc6a6	6	0.025598	0.09656	0.642432	3124	3	-5.0036	0.07985	0.083414	0.994321	1672	1	-5.0036
LOC100762526	6	0.037204	0.12923	0.709074	3765	4	-5.8607	0.079896	0.083443	0.994321	1673	1	-5.8607
Knstrn	6	0.0018543	0.0092514	0.302053	644	5	-3.9191	0.079989	0.083522	0.994321	1674	1	-3.9191
Hmgxb3	5	0.63218	0.7927	1	15898	2	-5.5747	0.080031	0.081785	0.994321	1675	1	-5.5747
Ubxn8	6	0.23866	0.48655	1	9955	3	-5.3269	0.080082	0.08361	0.994321	1676	1	-5.3269
LOC100756313	5	0.18798	0.41174	0.992987	8804	1	-5.4291	0.080108	0.081859	0.994321	1677	1	-5.4291
Alpk3	6	0.18692	0.41643	0.994798	8778	3	-5.0797	0.080129	0.08365	0.994321	1678	1	-5.0797
LOC100768038	5	0.13236	0.31627	0.921785	7480	3	-5.0686	0.080147	0.081894	0.994321	1679	1	-5.0686
Ca6	6	0.028789	0.10578	0.660985	3315	4	-4.5922	0.080175	0.083693	0.994321	1680	1	-4.5922
Khdrbs1	6	0.0077395	0.035432	0.462454	1608	5	-6.0318	0.080268	0.083772	0.994321	1681	1	-6.0318
LOC100769912	6	0.13031	0.33389	0.935065	7428	4	-4.8467	0.080314	0.083811	0.994321	1682	1	-4.8467
Stap1	6	0.30527	0.57085	1	11396	1	-5.282	0.080361	0.083852	0.994321	1683	1	-5.282
Spata3	6	0.0307	0.1111	0.671488	3422	4	-3.8445	0.080407	0.0839	0.994321	1684	1	-3.8445
Nphs1	6	0.022436	0.087348	0.619571	2920	4	-5.3048	0.080454	0.083934	0.994321	1685	1	-5.3048
CTRLX10708	1	0.91953	0.9199	1	18997	0	-3.5458	0.080467	0.08048	0.994321	1686	0	-3.5458
Ogt	6	0.99334	0.99327	1	20839	0	-5.7536	0.0805	0.083978	0.994321	1687	1	-5.7536
Abcd2	6	0.0087524	0.039705	0.479274	1735	4	-4.1657	0.080546	0.084026	0.994321	1688	1	-4.1657
LOC100764366	5	0.0030447	0.013023	0.328757	894	3	-4.6926	0.080574	0.082295	0.994321	1689	1	-4.6926
Rbm28	6	0.9996	0.99959	1	21615	0	-4.5345	0.080639	0.084106	0.994321	1690	1	-4.5345
Rem2	6	0.41223	0.66734	1	13004	3	-6.3216	0.080686	0.084146	0.994321	1691	1	-6.3216
CTRLX09230	1	0.9193	0.91968	1	18989	0	-0.42383	0.080699	0.080696	0.994321	1692	0	-0.42383
LOC100770009	6	0.85426	0.92861	1	18191	2	-6.1024	0.080732	0.08419	0.994321	1693	1	-6.1024
LOC100773943	2	0.99656	0.9965	1	21092	0	-1.923	0.080746	0.080623	0.994321	1694	0	-1.923
Fndc3b	6	0.44136	0.68876	1	13401	2	-5.533	0.080778	0.084234	0.994321	1695	1	-5.533
Hmcn1	6	0.68998	0.85589	1	16477	2	-5.5692	0.080825	0.084279	0.994321	1696	1	-5.5692
Tsnax	6	0.99097	0.99091	1	20699	0	-3.7669	0.080871	0.084323	0.994321	1697	1	-3.7669
Dlgap4	6	0.02613	0.098076	0.646431	3155	5	-6.4744	0.080918	0.084373	0.994321	1698	1	-6.4744
Fam122b	6	0.78653	0.89587	1	17404	1	-5.437	0.080964	0.084416	0.994321	1699	1	-5.437
Lep	6	0.56298	0.77708	1	15014	2	-6.0178	0.081057	0.084502	0.994321	1700	1	-6.0178
LOC100751743	6	0.19338	0.42547	0.998508	8936	1	-2.9479	0.081103	0.084555	0.994321	1701	1	-2.9479
Bbs2	6	0.53059	0.75378	1	14568	1	-3.2991	0.081149	0.0846	0.994321	1702	1	-3.2991
Sms	5	0.48764	0.71222	1	13983	2	-5.8076	0.081155	0.082861	0.994321	1703	1	-5.8076
Kiaa1107	6	0.71687	0.86647	1	16703	2	-5.6628	0.081196	0.08464	0.994321	1704	1	-5.6628
Tbx6	6	0.28505	0.54599	1	10969	3	-5.8758	0.081242	0.08468	0.994321	1705	1	-5.8758
CTRLX01743	1	0.91872	0.91912	1	18982	0	-3.5793	0.081275	0.081258	0.994321	1706	0	-3.5793
Mxd3	6	0.019457	0.078564	0.595375	2739	4	-6.1344	0.081335	0.084759	0.994321	1707	1	-6.1344
LOC103162324	6	0.99936	0.99933	1	21530	0	-3.4826	0.081381	0.084803	0.994321	1708	1	-3.4826
Aldh8a1	6	0.56179	0.77623	1	14999	2	-5.6266	0.081428	0.084846	0.994321	1709	1	-5.6266
CTRLX13276	1	0.9185	0.91888	1	18978	0	-0.70072	0.081504	0.081489	0.994321	1710	0	-0.70072
Kcnv2	6	0.052634	0.16958	0.769841	4533	3	-4.3767	0.08152	0.084938	0.994321	1711	1	-4.3767
Klk13	6	0.053405	0.17145	0.772248	4564	4	-5.3945	0.081567	0.084979	0.994321	1712	1	-5.3945
Pms2	6	0.584	0.79228	1	15268	3	-5.8192	0.081613	0.085016	0.994321	1713	1	-5.8192
LOC103164450	6	0.98661	0.98654	1	20445	0	-3.5516	0.08166	0.085053	0.994321	1714	1	-3.5516
Mst1r	6	0.31364	0.58097	1	11565	3	-3.7538	0.081752	0.085149	0.994321	1715	1	-3.7538
LOC100768666	6	0.77811	0.89215	1	17306	1	-3.6928	0.081799	0.085201	0.994321	1716	1	-3.6928
Tmod1	6	0.050282	0.16356	0.761963	4418	5	-6.0373	0.081845	0.085242	0.994321	1717	1	-6.0373
LOC100765019	6	0.014126	0.061267	0.548322	2321	3	-5.8212	0.081891	0.085287	0.994321	1718	1	-5.8212
LOC100761216	5	0.86438	0.9156	1	18340	1	-4.4444	0.08193	0.083601	0.994321	1719	1	-4.4444
Aoah	6	0.71081	0.86409	1	16659	2	-5.8235	0.081938	0.085333	0.994321	1720	1	-5.8235
Ppm1n	6	0.24922	0.50037	1	10202	4	-6.2485	0.081984	0.085374	0.994321	1721	1	-6.2485
Galm	6	0.54748	0.7659	1	14806	3	-3.8839	0.08203	0.085417	0.994321	1722	1	-3.8839
LOC100755233	6	0.039378	0.13506	0.719982	3876	4	-4.7079	0.082077	0.085469	0.994321	1723	1	-4.7079
Lgals8	6	0.83677	0.91964	1	17959	1	-3.7356	0.082169	0.085546	0.994321	1724	1	-3.7356
Ccnb2	6	0.51459	0.74216	1	14339	3	-6.4097	0.082216	0.085581	0.994321	1725	1	-6.4097
LOC100773429	6	0.26318	0.51841	1	10534	4	-4.4239	0.082262	0.085633	0.994321	1726	1	-4.4239
LOC100752657	4	0.70659	0.81923	1	16617	1	-4.5929	0.082352	0.082655	0.994321	1727	1	-4.5929
Ldhb	6	0.99484	0.9948	1	20944	0	-5.135	0.082355	0.085717	0.994321	1728	1	-5.135
Capn2	6	0.027742	0.10275	0.654951	3251	4	-5.7048	0.082447	0.085793	0.994321	1729	1	-5.7048
Drgx	6	0.53819	0.75923	1	14661	3	-4.9878	0.082494	0.085835	0.994321	1730	1	-4.9878
Anxa6	6	0.18544	0.41439	0.994293	8735	4	-6.0689	0.08254	0.085878	0.994321	1731	1	-6.0689
LOC100762293	6	0.068375	0.20858	0.820721	5251	5	-2.4846	0.082586	0.085924	0.994321	1732	1	-2.4846
Akna	6	0.13697	0.34402	0.942604	7585	4	-5.5968	0.082725	0.086065	0.994321	1733	1	-5.5968
LOC107977067	6	0.89012	0.94821	1	18740	1	-2.6203	0.082772	0.086111	0.994321	1734	1	-2.6203
Cnga3	6	0.97655	0.97772	1	20018	1	-6.0465	0.082818	0.086149	0.994321	1735	1	-6.0465
LOC100764473	5	0.42351	0.65254	1	13168	3	-3.4537	0.082859	0.084516	0.994321	1736	1	-3.4537
LOC100768540	4	0.90848	0.91222	1	18892	1	-4.6462	0.082881	0.083179	0.994321	1737	1	-4.6462
Lsm14b	6	0.37338	0.63853	1	12531	3	-3.1023	0.082911	0.086241	0.994321	1738	1	-3.1023
Slc35e4	6	0.31663	0.58458	1	11632	4	-5.3393	0.082957	0.086286	0.994321	1739	1	-5.3393
LOC100763702	1	0.91702	0.91739	1	18963	0	-3.6481	0.082984	0.082941	0.994321	1740	0	-3.6481
Irf7	6	0.016932	0.070977	0.575516	2550	4	-3.5355	0.083003	0.086325	0.994321	1741	1	-3.5355
LOC100754891	6	0.99285	0.99281	1	20803	0	-5.2268	0.083049	0.086373	0.994321	1742	1	-5.2268
Tet1	6	0.65837	0.84402	1	16214	2	-5.699	0.083142	0.08646	0.994321	1743	1	-5.699
LOC100756416	6	0.57746	0.78751	1	15199	3	-5.0062	0.083188	0.086505	0.994321	1744	1	-5.0062
Zmynd10	6	0.52692	0.75116	1	14514	3	-5.9851	0.083235	0.086543	0.994321	1745	1	-5.9851
Prkcq	6	0.17557	0.40033	0.985388	8512	3	-4.251	0.083327	0.086628	0.994321	1746	1	-4.251
LOC100763819	6	0.30646	0.57231	1	11413	3	-5.2657	0.083374	0.086669	0.994321	1747	1	-5.2657
Rpl3l	6	0.47807	0.71559	1	13859	3	-4.5336	0.08342	0.08671	0.994321	1748	1	-4.5336
LOC100768731	6	0.5746	0.78547	1	15161	2	-6.3557	0.083466	0.086747	0.994321	1749	1	-6.3557
Thnsl2	6	0.10761	0.29789	0.903308	6831	4	-4.7572	0.083512	0.086793	0.994321	1750	1	-4.7572
E2f1	6	0.95163	0.96493	1	19422	1	-6.2056	0.083559	0.086839	0.994321	1751	1	-6.2056
CTRLX17948	1	0.91638	0.91672	1	18956	0	-0.61766	0.083619	0.08355	0.994321	1752	0	-0.61766
Vstm2b	6	0.11734	0.31404	0.920169	7079	4	-5.1918	0.083651	0.086927	0.994321	1753	1	-5.1918
Wif1	6	0.86532	0.9344	1	18352	2	-1.884	0.083697	0.086972	0.994321	1754	1	-1.884
Zfand3	6	0.31685	0.58483	1	11638	4	-5.0325	0.083744	0.087018	0.994321	1755	1	-5.0325
Dysf	6	0.61112	0.81156	1	15609	3	-1.9552	0.083836	0.087104	0.994321	1756	1	-1.9552
Slx4ip	6	0.15364	0.36873	0.964897	7983	2	-3.2376	0.083883	0.087158	0.994321	1757	1	-3.2376
Col6a2	6	0.28978	0.5519	1	11067	4	-3.7651	0.083975	0.08724	0.994321	1758	1	-3.7651
Ube2q2	6	0.098458	0.27798	0.884023	6498	5	-4.9188	0.084021	0.087285	0.994321	1759	1	-4.9188
LOC100765464	6	0.033179	0.11812	0.684025	3571	2	-6.2894	0.084114	0.087363	0.994321	1760	1	-6.2894
Alkbh1	4	0.80266	0.85403	1	17583	1	-4.2128	0.084124	0.084377	0.994321	1761	1	-4.2128
Fcn1	6	0.19301	0.42493	0.998424	8922	3	-6.5072	0.08416	0.087404	0.994321	1762	1	-6.5072
Pip	6	0.031748	0.11407	0.676294	3489	2	-5.8052	0.084206	0.087449	0.994321	1763	1	-5.8052
CTRLX13888	1	0.91575	0.91608	1	18950	0	-3.7024	0.084245	0.08418	0.994321	1764	0	-3.7024
Reps1	6	0.0591	0.18592	0.792332	4837	5	-5.8917	0.084299	0.087529	0.994321	1765	1	-5.8917
LOC100766652	6	0.78867	0.8968	1	17425	2	-4.6906	0.084345	0.087578	0.994321	1766	1	-4.6906
Gpatch2l	6	0.22933	0.47436	1	9727	4	-4.2778	0.084391	0.087619	0.994321	1767	1	-4.2778
LOC100762026	6	0.11747	0.31425	0.920169	7083	3	-5.1618	0.084438	0.087668	0.994321	1768	1	-5.1618
Triml1	6	0.77926	0.89267	1	17318	2	-4.2841	0.08453	0.087761	0.994321	1769	1	-4.2841
LOC100772107	6	0.75563	0.88234	1	17069	2	-6.3951	0.084576	0.087808	0.994321	1770	1	-6.3951
LOC100767289	2	0.99721	0.99716	1	21160	0	-1.7615	0.084591	0.08446	0.994321	1771	0	-1.7615
LOC100760967	6	0.021683	0.085144	0.6128	2878	5	-6.2023	0.084715	0.087947	0.994321	1772	1	-6.2023
Srrt	6	0.99984	0.99983	1	21719	0	-5.7214	0.084761	0.087992	0.994321	1773	1	-5.7214
Slc6a17	6	0.020559	0.081803	0.602489	2806	4	-5.374	0.084808	0.088034	0.994321	1774	1	-5.374
Isl1	6	0.0012401	0.0062538	0.269714	484	4	-5.1507	0.084854	0.088079	0.994321	1775	1	-5.1507
Slx1a	6	0.055533	0.17689	0.780323	4663	5	-6.8203	0.0849	0.088117	0.994321	1776	1	-6.8203
LOC107977748	6	0.64016	0.83199	1	16007	2	-5.2217	0.084946	0.088167	0.994321	1777	1	-5.2217
Dennd4c	6	0.014076	0.061089	0.547573	2318	4	-6.3739	0.085085	0.088296	0.994321	1778	1	-6.3739
Ltbp2	6	0.9882	0.98814	1	20529	0	-5.7616	0.085131	0.08834	0.994321	1779	1	-5.7616
LOC100753674	6	0.17802	0.40386	0.987949	8569	3	-6.314	0.085177	0.088382	0.994321	1780	1	-6.314
Fam163b	6	0.20208	0.43748	1	9125	4	-5.3895	0.085223	0.088424	0.994321	1781	1	-5.3895
LOC107978250	5	0.37459	0.60524	1	12547	3	-5.8096	0.085256	0.086801	0.994321	1782	1	-5.8096
Klf10	6	0.3861	0.64797	1	12686	1	-4.399	0.08527	0.088466	0.994321	1783	1	-4.399
Chka	5	0.99951	0.9995	1	21579	0	-4.1305	0.085295	0.086832	0.994321	1784	1	-4.1305
Agbl3	6	0.2022	0.43766	1	9131	2	-3.4291	0.085362	0.088551	0.994321	1785	1	-3.4291
Pigf	6	0.24731	0.49791	1	10161	3	-5.2297	0.085408	0.088598	0.994321	1786	1	-5.2297
LOC100751530	5	0.73906	0.85457	1	16905	2	-4.6714	0.08545	0.086989	0.994321	1787	1	-4.6714
Dnai1	6	0.028031	0.10355	0.656923	3270	3	-5.8086	0.085455	0.088634	0.994321	1788	1	-5.8086
Plekhg6	6	0.024994	0.094818	0.637623	3090	4	-5.5867	0.085547	0.088713	0.994321	1789	1	-5.5867
LOC100752901	2	0.99045	0.99034	1	20675	0	-2.6002	0.085559	0.085403	0.994321	1790	0	-2.6002
LOC100765363	2	0.64061	0.65046	1	16014	1	-3.6476	0.085559	0.085403	0.994321	1791	0	-3.6476
LOC103160199	6	0.53638	0.75791	1	14639	3	-6.1463	0.085593	0.088758	0.994321	1792	1	-6.1463
LOC107977003	6	0.027779	0.10285	0.654951	3255	2	-3.9582	0.085639	0.088799	0.994321	1793	1	-3.9582
Hmgcll1	5	0.86595	0.91609	1	18361	1	-4.8877	0.085643	0.087165	0.994321	1794	1	-4.8877
Plch2	6	0.041376	0.14037	0.72809	3979	5	-4.7182	0.085685	0.088838	0.994321	1795	1	-4.7182
Akap3	6	0.21466	0.45482	1	9421	2	-2.7047	0.085732	0.088884	0.994321	1796	1	-2.7047
Rag1	6	0.050711	0.16466	0.762528	4443	5	-5.83	0.085778	0.088927	0.994321	1797	1	-5.83
LOC103158822	6	0.2174	0.45842	1	9479	4	-6.4341	0.085824	0.088974	0.994321	1798	1	-6.4341
Ppp1r15a	6	0.21327	0.45293	1	9395	4	-5.0401	0.08587	0.089019	0.994321	1799	1	-5.0401
Pald1	6	0.58387	0.79218	1	15267	3	-4.9785	0.085916	0.08906	0.994321	1800	1	-4.9785
Grip1	6	0.065257	0.20099	0.812415	5107	3	-4.982	0.086009	0.089143	0.994321	1801	1	-4.982
LOC100753682	5	0.96682	0.96706	1	19747	1	-5.8781	0.086029	0.087534	0.994321	1802	1	-5.8781
Isg20	6	0.017647	0.073111	0.580993	2605	4	-5.6023	0.086055	0.089189	0.994321	1803	1	-5.6023
LOC100765353	6	0.049657	0.16197	0.759976	4386	5	-5.8246	0.086147	0.089273	0.994321	1804	1	-5.8246
Als2cr12	6	0.24972	0.50105	1	10212	4	-6.3964	0.086193	0.089312	0.994321	1805	1	-6.3964
Znf474	6	0.079872	0.2357	0.849064	5741	4	-3.8733	0.08624	0.089356	0.994321	1806	1	-3.8733
Kcne3	6	0.63897	0.83117	1	15989	2	-4.7088	0.086286	0.089396	0.994321	1807	1	-4.7088
Wnt9b	6	0.092701	0.26509	0.87525	6249	3	-4.1323	0.086332	0.08944	0.994321	1808	1	-4.1323
Styk1	6	0.016486	0.069627	0.572147	2519	3	-3.1707	0.086378	0.089475	0.994321	1809	1	-3.1707
LOC100761053	6	0.070405	0.2135	0.826737	5334	3	-4.6359	0.086424	0.08952	0.994321	1810	1	-4.6359
Ifitm3	6	0.017186	0.071729	0.577055	2568	3	-3.5138	0.086517	0.089611	0.994321	1811	1	-3.5138
Letm2	5	0.073097	0.20193	0.813157	5450	4	-5.1914	0.08653	0.088021	0.994321	1812	1	-5.1914
Nrp2	6	0.49779	0.72994	1	14119	2	-5.0735	0.086609	0.089696	0.994321	1813	1	-5.0735
Anxa7	6	0.26875	0.52553	1	10643	2	-4.5518	0.086655	0.08974	0.994321	1814	1	-4.5518
Gcdh	6	0.055865	0.17773	0.780362	4682	3	-6.1829	0.086701	0.089772	0.994321	1815	1	-6.1829
Gpc6	6	0.2072	0.44455	1	9241	3	-5.339	0.086747	0.089818	0.994321	1816	1	-5.339
Farp2	6	0.98863	0.98857	1	20560	0	-3.8341	0.086793	0.089857	0.994321	1817	1	-3.8341
LOC100773736	5	0.94515	0.95027	1	19315	1	-5.5783	0.0868	0.088278	0.994321	1818	1	-5.5783
Rbm15b	6	0.19888	0.43313	1	9046	4	-6.1688	0.08684	0.0899	0.994321	1819	1	-6.1688
Pigm	6	0.030086	0.10941	0.668803	3391	5	-5.2783	0.086886	0.089939	0.994321	1820	1	-5.2783
2005-03-01	6	0.99926	0.99924	1	21500	0	-5.4271	0.087024	0.090065	0.994321	1821	1	-5.4271
Art4	6	0.99031	0.99025	1	20665	0	-5.2295	0.08707	0.090102	0.994321	1822	1	-5.2295
LOC107980392	2	0.99346	0.99338	1	20847	0	-2.58	0.087089	0.086946	0.994321	1823	0	-2.58
LOC100772286	2	0.3952	0.47228	1	12791	1	-3.7215	0.087089	0.086946	0.994321	1824	0	-3.7215
LOC100750611	6	0.019666	0.079179	0.596016	2752	4	-5.0733	0.087209	0.090226	0.994321	1825	1	-5.0733
Cd53	5	0.97622	0.97629	1	20007	0	-3.7873	0.087224	0.088676	0.994321	1826	1	-3.7873
Fabp3	6	0.3267	0.59656	1	11820	2	-5.7116	0.087301	0.090309	0.994321	1827	1	-5.7116
Als2cl	6	0.29711	0.5609	1	11229	4	-3.335	0.087347	0.090354	0.994321	1828	1	-3.335
Gna13	6	0.56394	0.77775	1	15025	3	-4.7808	0.087393	0.090398	0.994321	1829	1	-4.7808
LOC100762355	5	0.1556	0.35764	0.955456	8024	3	-3.6173	0.087417	0.088867	0.994321	1830	1	-3.6173
Azin1	5	0.88832	0.92355	1	18707	1	-4.0962	0.087456	0.088909	0.994321	1831	1	-4.0962
Gas8	6	0.5303	0.75358	1	14562	2	-5.1212	0.087485	0.090484	0.994321	1832	1	-5.1212
Tfpi2	6	0.81346	0.90824	1	17704	1	-3.8568	0.087532	0.090525	0.994321	1833	1	-3.8568
LOC103158596	6	0.36998	0.63602	1	12493	3	-5.476	0.087578	0.090568	0.994321	1834	1	-5.476
Luc7l3	6	0.99688	0.99687	1	21122	0	-5.8476	0.087624	0.090614	0.994321	1835	1	-5.8476
Ccs	6	0.40182	0.6596	1	12879	3	-6.6101	0.08767	0.090656	0.994321	1836	1	-6.6101
Ormdl1	6	0.097731	0.27635	0.882319	6474	4	-5.5176	0.087716	0.090701	0.994321	1837	1	-5.5176
Ndufv3	6	0.21523	0.45559	1	9437	4	-6.4212	0.087808	0.09079	0.994321	1838	1	-6.4212
Stk38	6	0.82465	0.91361	1	17826	1	-4.961	0.0879	0.090874	0.994321	1839	1	-4.961
Gria1	6	0.066606	0.20426	0.816636	5168	4	-5.3925	0.087993	0.090973	0.994321	1840	1	-5.3925
LOC100758795	5	0.26698	0.49614	1	10614	1	-5.3284	0.088034	0.089455	0.994321	1841	1	-5.3284
Kif18a	6	0.66491	0.84644	1	16266	2	-5.4811	0.088039	0.091017	0.994321	1842	1	-5.4811
Hgd	6	0.032178	0.11531	0.678582	3518	4	-5.9449	0.088085	0.091065	0.994321	1843	1	-5.9449
Pef1	6	0.020855	0.082685	0.604647	2824	5	-4.9272	0.088177	0.091149	0.994321	1844	1	-4.9272
Nhs	6	0.2989	0.5631	1	11268	4	-4.923	0.088269	0.091237	0.994321	1845	1	-4.923
LOC100763017	6	0.012754	0.055888	0.534729	2177	5	-4.3276	0.088361	0.091315	0.994321	1846	1	-4.3276
LOC100761135	2	0.9933	0.99323	1	20837	0	-2.6088	0.088373	0.088255	0.994321	1847	0	-2.6088
Acp2	6	0.14337	0.35361	0.951584	7742	3	-6.5254	0.088407	0.091361	0.994321	1848	1	-6.5254
Rab33a	6	0.21127	0.45018	1	9349	3	-4.426	0.088453	0.091398	0.994321	1849	1	-4.426
LOC103160024	4	0.61678	0.75801	1	15676	1	-5.1408	0.088558	0.08867	0.994321	1850	1	-5.1408
CTRLX10297	1	0.91141	0.91168	1	18912	0	-3.8641	0.088592	0.088519	0.994321	1851	0	-3.8641
LOC107980194	6	0.98538	0.98532	1	20379	0	-4.4156	0.088638	0.09156	0.994321	1852	1	-4.4156
Spink4	6	0.025216	0.095447	0.639692	3099	5	-5.2596	0.088684	0.091598	0.994321	1853	1	-5.2596
Fam83f	6	0.10864	0.3001	0.905944	6867	3	-5.915	0.08873	0.091637	0.994321	1854	1	-5.915
LOC103161149	6	0.098817	0.27878	0.884592	6517	3	-4.3919	0.088776	0.091679	0.994321	1855	1	-4.3919
LOC100761886	3	0.9539	0.95418	1	19465	0	-4.268	0.088799	0.088528	0.994321	1856	0	-4.268
Ccdc114	6	0.686	0.85437	1	16441	2	-5.9448	0.088914	0.091803	0.994321	1857	1	-5.9448
Znf383	5	0.99391	0.99388	1	20879	0	-5.7182	0.088958	0.090335	0.994321	1858	1	-5.7182
Samd4b	6	0.20409	0.44026	1	9177	4	-5.4871	0.08896	0.091841	0.994321	1859	1	-5.4871
Ppif	6	0.02054	0.081742	0.602489	2804	5	-5.9469	0.089006	0.091886	0.994321	1860	1	-5.9469
Spata22	6	0.72704	0.87057	1	16794	2	-4.0728	0.089052	0.091927	0.994321	1861	1	-4.0728
Spty2d1	6	0.12239	0.32181	0.928801	7194	3	-6.5231	0.089098	0.09198	0.994321	1862	1	-6.5231
Slc39a4	6	0.076795	0.22868	0.842464	5614	4	-5.6429	0.089144	0.092018	0.994321	1863	1	-5.6429
Fmnl2	6	0.4939	0.72709	1	14066	2	-6.2607	0.08919	0.092064	0.994321	1864	1	-6.2607
Trim7	6	0.13824	0.34592	0.944148	7609	3	-6.125	0.089236	0.092106	0.994321	1865	1	-6.125
Cetn2	6	0.012354	0.054301	0.533104	2124	4	-6.1275	0.089282	0.092152	0.994321	1866	1	-6.1275
LOC100767636	5	0.55309	0.75055	1	14874	1	-2.7733	0.089305	0.090663	0.994321	1867	1	-2.7733
Fbln7	6	0.2827	0.54302	1	10911	4	-4.9841	0.089328	0.092197	0.994321	1868	1	-4.9841
LOC100756085	6	0.0012752	0.0064292	0.272201	494	5	-5.4287	0.089375	0.092236	0.994321	1869	1	-5.4287
Smarca5	5	0.49142	0.71565	1	14028	3	-4.2326	0.089382	0.090727	0.994321	1870	1	-4.2326
Metrnl	6	0.082077	0.24088	0.854085	5825	4	-5.5635	0.089421	0.092278	0.994321	1871	1	-5.5635
LOC100760681	6	0.0016898	0.0084442	0.296958	598	5	-5.2592	0.089467	0.092323	0.994321	1872	1	-5.2592
Mlc1	5	0.13846	0.32742	0.931914	7616	3	-6.5813	0.089497	0.090845	0.994321	1873	1	-6.5813
Dhrs3	6	0.0096854	0.04362	0.494134	1852	4	-6.3765	0.089513	0.092357	0.994321	1874	1	-6.3765
LOC100773062	6	0.19875	0.43296	1	9043	3	-5.6372	0.089559	0.092404	0.994321	1875	1	-5.6372
Htra3	6	0.0032188	0.015587	0.350744	932	4	-5.9743	0.089605	0.092444	0.994321	1876	1	-5.9743
Lrriq1	6	0.061213	0.19117	0.80282	4913	3	-5.1813	0.089651	0.092485	0.994321	1877	1	-5.1813
LOC100760701	6	0.0031787	0.01541	0.350744	917	5	-5.4045	0.089743	0.092568	0.994321	1878	1	-5.4045
Golga5	6	0.79935	0.90163	1	17531	1	-3.9499	0.089789	0.09261	0.994321	1879	1	-3.9499
Usp43	6	0.7794	0.89273	1	17321	2	-5.3174	0.089835	0.09265	0.994321	1880	1	-5.3174
LOC100767416	4	0.61188	0.75418	1	15617	1	-6.6626	0.089857	0.089917	0.994321	1881	1	-6.6626
Arhgdig	6	0.12888	0.33165	0.933961	7383	4	-3.9542	0.089881	0.092693	0.994321	1882	1	-3.9542
LOC107978969	6	0.94724	0.96328	1	19343	1	-5.6633	0.089927	0.092726	0.994321	1883	1	-5.6633
Acot11	6	0.44304	0.69002	1	13421	3	-5.3162	0.090019	0.092819	0.994321	1884	1	-5.3162
Lrrc46	6	0.20764	0.44518	1	9253	2	-5.1119	0.090065	0.092851	0.994321	1885	1	-5.1119
Ssfa2	6	0.63566	0.82884	1	15940	3	-4.9915	0.090111	0.092902	0.994321	1886	1	-4.9915
Ash1l	6	0.8047	0.9041	1	17610	1	-5.5063	0.090157	0.092939	0.994321	1887	1	-5.5063
P2ry4	5	0.42692	0.65576	1	13223	2	-5.6003	0.090189	0.091502	0.994321	1888	1	-5.6003
Stc2	6	0.04673	0.15446	0.751002	4239	4	-5.8126	0.090249	0.093037	0.994321	1889	1	-5.8126
Mfap1	6	0.95851	0.96783	1	19561	1	-4.1274	0.090295	0.09309	0.994321	1890	1	-4.1274
LOC100756612	6	0.014786	0.063783	0.555855	2387	5	-4.3109	0.090341	0.09313	0.994321	1891	1	-4.3109
LOC100772413	6	0.35639	0.62593	1	12320	3	-5.0964	0.090387	0.093172	0.994321	1892	1	-5.0964
LOC100757526	5	0.017701	0.066725	0.562941	2609	4	-6.3347	0.090497	0.091805	0.994321	1893	1	-6.3347
LOC100765341	2	0.99092	0.99081	1	20697	0	-2.9473	0.090589	0.090499	0.994321	1894	0	-2.9473
Ebf3	6	0.23721	0.48465	1	9919	3	-6.0333	0.090617	0.09339	0.994321	1895	1	-6.0333
Timm8b	6	0.49573	0.72842	1	14089	3	-6.2583	0.090663	0.09344	0.994321	1896	1	-6.2583
LOC100766310	4	0.3908	0.58957	1	12739	1	-5.7571	0.090723	0.090767	0.994321	1897	1	-5.7571
Il33	5	0.029796	0.10579	0.660985	3375	3	-5.2242	0.090728	0.092024	0.994321	1898	1	-5.2242
Hdac9	6	0.050515	0.16414	0.762375	4430	5	-6.1317	0.090755	0.093529	0.994321	1899	1	-6.1317
Fxyd6	5	0.17054	0.38312	0.974633	8388	3	-3.3189	0.090766	0.092067	0.994321	1900	1	-3.3189
Ptbp1	6	0.32998	0.60038	1	11885	4	-6.2513	0.090801	0.09358	0.994321	1901	1	-6.2513
Crnkl1	4	0.54312	0.70166	1	14749	1	-4.7873	0.090877	0.090911	0.994321	1902	1	-4.7873
Lag3	6	0.24113	0.48982	1	10006	4	-4.208	0.090893	0.093664	0.994321	1903	1	-4.208
Micall1	6	0.214	0.45393	1	9408	2	-4.4246	0.090939	0.093708	0.994321	1904	1	-4.4246
LOC100756584	5	0.73021	0.84916	1	16821	1	-5.742	0.090958	0.092254	0.994321	1905	1	-5.742
Tnks1bp1	6	0.17416	0.3983	0.984463	8476	3	-6.2751	0.090985	0.093745	0.994321	1906	1	-6.2751
Tbce	5	0.63234	0.7928	1	15905	1	-4.2289	0.090997	0.092293	0.994321	1907	1	-4.2289
LOC103158941	6	0.98074	0.98097	1	20176	1	-5.6253	0.091031	0.093794	0.994321	1908	1	-5.6253
LOC100762534	6	0.73722	0.87472	1	16882	2	-5.8899	0.091122	0.093888	0.994321	1909	1	-5.8899
Il17a	6	0.94664	0.96305	1	19333	1	-5.9883	0.091168	0.093936	0.994321	1910	1	-5.9883
LOC100755173	6	0.59222	0.79815	1	15361	2	-5.683	0.091214	0.093979	0.994321	1911	1	-5.683
Raver1	6	0.080871	0.23801	0.851583	5778	3	-4.9555	0.09126	0.09403	0.994321	1912	1	-4.9555
Chrdl2	6	0.85282	0.92786	1	18167	2	-2.0387	0.091352	0.09412	0.994321	1913	1	-2.0387
LOC100757910	5	0.0032307	0.013752	0.337005	937	4	-5.1529	0.091381	0.092652	0.994321	1914	1	-5.1529
Nt5dc1	6	0.1354	0.34162	0.940475	7549	4	-5.9343	0.091398	0.094163	0.994321	1915	1	-5.9343
LOC100770984	5	0.99867	0.99869	1	21375	0	-5.0735	0.091419	0.092691	0.994321	1916	1	-5.0735
Reep5	6	0.028775	0.10574	0.660985	3313	5	-3.6892	0.091444	0.09421	0.994321	1917	1	-3.6892
Snrpg	2	0.99221	0.99213	1	20762	0	-2.8231	0.091459	0.091391	0.994321	1918	0	-2.8231
LOC103164542	1	0.90853	0.90882	1	18894	0	-3.9848	0.091466	0.091422	0.994321	1919	0	-3.9848
LOC100755728	6	0.12356	0.32354	0.928908	7231	3	-3.533	0.091582	0.094345	0.994321	1920	1	-3.533
Clec5a	6	0.026302	0.098578	0.647229	3163	5	-5.0755	0.091628	0.094388	0.994321	1921	1	-5.0755
Jkamp	6	0.89006	0.94817	1	18738	2	-5.074	0.091674	0.094431	0.994321	1922	1	-5.074
Tcf3	6	0.57181	0.78341	1	15127	3	-5.8463	0.091766	0.094515	0.994321	1923	1	-5.8463
Apbb1	6	0.28797	0.54967	1	11018	2	-4.7363	0.091812	0.094562	0.994321	1924	1	-4.7363
Ap3m1	6	0.99076	0.9907	1	20688	0	-3.7419	0.091858	0.094602	0.994321	1925	1	-3.7419
Hhipl1	6	0.090215	0.25949	0.871933	6136	4	-5.6427	0.091904	0.094631	0.994321	1926	1	-5.6427
Gfod1	6	0.0026034	0.012795	0.327108	824	5	-5.4582	0.091949	0.094681	0.994321	1927	1	-5.4582
LOC100765406	5	0.0043751	0.018319	0.362895	1145	4	-5.2061	0.092034	0.093279	0.994321	1928	1	-5.2061
Rac1	6	0.0093106	0.042046	0.488139	1807	4	-4.6046	0.092041	0.09476	0.994321	1929	1	-4.6046
Spic	5	0.68493	0.8225	1	16430	1	-5.2416	0.092072	0.093316	0.994321	1930	1	-5.2416
LOC100755258	6	0.015415	0.066226	0.562528	2445	5	-4.3586	0.092087	0.094798	0.994321	1931	1	-4.3586
LOC103158666	4	0.99069	0.99063	1	20685	0	-3.0441	0.092112	0.092151	0.994321	1932	1	-3.0441
Entpd2	6	0.011507	0.050949	0.523057	2037	4	-4.5078	0.092133	0.094836	0.994321	1933	1	-4.5078
CTRLX12534	1	0.90784	0.90812	1	18883	0	-4.0127	0.092159	0.092113	0.994321	1934	0	-4.0127
Dnajc14	6	0.62511	0.82145	1	15802	1	-5.0322	0.092179	0.094877	0.994321	1935	1	-5.0322
Ehbp1	6	0.97323	0.97547	1	19923	1	-3.3424	0.092225	0.094919	0.994321	1936	1	-3.3424
LOC100772384	3	0.31645	0.46996	1	11630	1	-5.4646	0.092233	0.091892	0.994321	1937	0	-5.4646
Brd3	6	0.4954	0.72818	1	14084	3	-5.9284	0.092271	0.094959	0.994321	1938	1	-5.9284
Ogfrl1	6	0.56192	0.77632	1	15000	3	-5.9023	0.092363	0.095053	0.994321	1939	1	-5.9023
Mkln1	5	0.80695	0.89794	1	17636	1	-4.2753	0.092379	0.093627	0.994321	1940	1	-4.2753
Epm2aip1	6	0.0019239	0.0095953	0.303585	664	5	-5.7962	0.092409	0.095104	0.994321	1941	1	-5.7962
Meis2	6	0.62505	0.8214	1	15801	3	-5.7749	0.092455	0.095134	0.994321	1942	1	-5.7749
LOC100769980	6	0.79708	0.90061	1	17505	1	-3.3069	0.0925	0.095173	0.994321	1943	1	-3.3069
Khdc3l	5	0.29473	0.52494	1	11177	1	-2.699	0.092533	0.093776	0.994321	1944	1	-2.699
CTRLX18582	1	0.90744	0.90774	1	18881	0	-4.025	0.092561	0.092503	0.994321	1945	0	-4.025
Stk3	6	0.54945	0.76729	1	14829	2	-6.5191	0.092592	0.095262	0.994321	1946	1	-6.5191
LOC100774880	4	0.9586	0.95854	1	19563	0	-5.1313	0.092637	0.092693	0.994321	1947	1	-5.1313
Gpr107	6	0.54542	0.76443	1	14783	3	-5.5623	0.092684	0.095347	0.994321	1948	1	-5.5623
CTRLX13539	1	0.9073	0.90759	1	18878	0	-0.71436	0.092702	0.092644	0.994321	1949	0	-0.71436
Cmpk2	6	0.12378	0.32387	0.929155	7234	4	-5.8885	0.092822	0.095482	0.994321	1950	1	-5.8885
Ctgf	6	0.12883	0.33159	0.933901	7380	4	-6.2553	0.092868	0.095526	0.994321	1951	1	-6.2553
Acd	6	0.98595	0.98589	1	20409	0	-3.8211	0.092913	0.095569	0.994321	1952	1	-3.8211
Spg20	6	0.45434	0.6983	1	13560	3	-5.9739	0.092959	0.095611	0.994321	1953	1	-5.9739
Rbm46	6	0.18865	0.41885	0.995387	8820	3	-4.3918	0.093005	0.095659	0.994321	1954	1	-4.3918
Snurf	6	0.13424	0.33989	0.939372	7520	3	-3.9337	0.093051	0.095701	0.994321	1955	1	-3.9337
CTRLX05754	1	0.90693	0.90723	1	18874	0	-0.46864	0.093067	0.093009	0.994321	1956	0	-0.46864
Dmrt1	6	0.0082442	0.037545	0.472204	1666	5	-5.2816	0.093097	0.095739	0.994321	1957	1	-5.2816
LOC100773713	5	0.99739	0.99738	1	21186	0	-3.4098	0.093108	0.094328	0.994321	1958	1	-3.4098
Sox8	6	0.29821	0.56224	1	11255	3	-3.4163	0.093143	0.095784	0.994321	1959	1	-3.4163
Ccr7	6	0.98472	0.98464	1	20351	0	-4.8861	0.093189	0.09583	0.994321	1960	1	-4.8861
LOC100773835	6	0.12337	0.32327	0.928908	7222	4	-5.9726	0.093235	0.095868	0.994321	1961	1	-5.9726
Atad2b	6	0.49074	0.72484	1	14020	1	-5.5585	0.09328	0.095916	0.994321	1962	1	-5.5585
LOC100774077	5	0.97955	0.97965	1	20129	0	-2.944	0.0933	0.094525	0.994321	1963	1	-2.944
Ms4a8	6	0.98637	0.98631	1	20430	0	-5.1134	0.093418	0.096048	0.994321	1964	1	-5.1134
LOC100756748	6	0.027454	0.10194	0.653557	3232	3	-4.1731	0.093464	0.096091	0.994321	1965	1	-4.1731
Hoxa3	6	0.2819	0.54202	1	10890	3	-3.8788	0.093556	0.096183	0.994321	1966	1	-3.8788
Pabpc1l	6	0.0040655	0.019489	0.368411	1100	5	-5.8463	0.093831	0.096439	0.994321	1967	1	-5.8463
Acrbp	6	0.33594	0.60737	1	11998	4	-5.7476	0.093877	0.096475	0.994321	1968	1	-5.7476
Serpina12	6	0.094741	0.26973	0.878735	6343	4	-5.7618	0.093922	0.096515	0.994321	1969	1	-5.7618
Cdh26	6	0.61829	0.81664	1	15701	2	-4.2949	0.094014	0.096595	0.994321	1970	1	-4.2949
Rhov	6	0.026313	0.09861	0.647229	3166	5	-6.2438	0.09406	0.096634	0.994321	1971	1	-6.2438
Ventx	6	0.00053328	0.0028016	0.211374	279	5	-5.3412	0.094106	0.096676	0.994321	1972	1	-5.3412
LOC100750423	4	0.52962	0.69142	1	14548	1	-3.7418	0.094117	0.094151	0.994321	1973	1	-3.7418
LOC100770382	6	0.81196	0.90755	1	17691	2	-5.7094	0.094152	0.096718	0.994321	1974	1	-5.7094
Nt5c2	6	0.06503	0.20044	0.812415	5088	4	-5.9258	0.094198	0.096771	0.994321	1975	1	-5.9258
Azin2	6	0.33013	0.60056	1	11889	3	-5.6636	0.094243	0.096812	0.994321	1976	1	-5.6636
Acbd4	6	0.016811	0.07062	0.574964	2539	4	-6.4697	0.094335	0.096893	0.994321	1977	1	-6.4697
Ccnl2	6	0.048105	0.15802	0.755024	4314	1	-2.633	0.094381	0.096943	0.994321	1978	1	-2.633
CTRLX15004	1	0.90562	0.90593	1	18862	0	-3.5269	0.094382	0.094333	0.994321	1979	0	-3.5269
Rps27l	5	0.99958	0.99957	1	21605	0	-5.3123	0.09445	0.0956	0.994321	1980	1	-5.3123
LOC100770696	4	0.99984	0.99984	1	21713	0	-2.3869	0.094455	0.094478	0.994321	1981	1	-2.3869
Bace2	6	0.9154	0.95395	1	18946	1	-5.2086	0.094472	0.097017	0.994321	1982	1	-5.2086
Plppr3	6	0.74655	0.87852	1	16979	2	-3.5606	0.094518	0.097057	0.994321	1983	1	-3.5606
Eps15l1	6	0.28635	0.54765	1	10995	3	-2.6188	0.094564	0.097092	0.994321	1984	1	-2.6188
Enpp7	6	0.767	0.88729	1	17190	1	-5.8057	0.09461	0.097137	0.994321	1985	1	-5.8057
Kcng3	6	0.048391	0.15876	0.756023	4325	2	-4.3847	0.094656	0.097179	0.994321	1986	1	-4.3847
Shbg	6	0.1306	0.33437	0.935252	7435	4	-5.0112	0.094702	0.097228	0.994321	1987	1	-5.0112
LOC103158908	3	0.99615	0.99623	1	21060	0	-4.6118	0.094704	0.094337	0.994321	1988	0	-4.6118
B4galt3	5	0.35334	0.58413	1	12269	3	-6.3718	0.094718	0.095849	0.994321	1989	1	-6.3718
Fam71e1	6	0.14886	0.3617	0.958675	7868	4	-4.5872	0.094747	0.097268	0.994321	1990	1	-4.5872
Acp6	6	0.016813	0.070628	0.574964	2540	5	-5.7327	0.094793	0.09732	0.994321	1991	1	-5.7327
Mst1	6	0.82167	0.91215	1	17789	1	-5.822	0.094839	0.097367	0.994321	1992	1	-5.822
LOC100767989	6	0.12843	0.33097	0.933681	7365	3	-4.4737	0.094885	0.097413	0.994321	1993	1	-4.4737
LOC100757905	6	0.71295	0.8649	1	16671	2	-3.1246	0.094931	0.097466	0.994321	1994	1	-3.1246
Anxa4	5	0.20678	0.43219	1	9233	2	-5.404	0.094986	0.096121	0.994321	1995	1	-5.404
Ermap	6	0.0089633	0.040608	0.481894	1764	3	-5.5914	0.095022	0.097541	0.994321	1996	1	-5.5914
LOC100770394	6	0.99374	0.99368	1	20872	0	-4.0318	0.095114	0.097625	0.994321	1997	1	-4.0318
LOC100762836	5	0.015564	0.059303	0.542753	2463	3	-4.2029	0.095178	0.096309	0.994321	1998	1	-4.2029
Kdm3a	5	0.51696	0.73204	1	14367	2	-2.724	0.095254	0.096386	0.994321	1999	1	-2.724
[truncated: 19,910 more rows]
